# Supplementary material
Source: PubMed Central journal article supplement (PMC11022542)
Supplement: aem.02099-23-s0002.pdf [file aem.02099-23-s0002.pdf]

```
1 >WP_085441360_NuoL_Magnetofaba_australis
2 MST-----YKLIVLLPLMGSIAGLFG----RRLGNQMSQIVTIGGIGLALLLSIKAFFEIAL--GDAP-
... AVHETFFTWIPSGDFVVTLGVLVDRLTAIMLIVVTGVSTLVHIYSVNYMEEDPD-----
... VPRFFSYLSLFSFAMLSLVTAPNFLQLFFGWEGVGLASYLLIGFWFKKESACNAAIKAFLVNRVGDGFGFALGVF
... GVFMVFGTLDLFLGDKGVFMALTNQAT----
... MMFLGHEFNTMTLICLLLFMGAMGKSAQFFLHTWLPDAMEGPTPVSALIIHAATMVTAGVFLVCRASPLFEQSET
... ALMVVTVIGAVTAIFAASVGLVQNDIKRVIAYSTCSQLGYMFFAAGVSAYAASMFHLMTHAFFKALLFLGAGAV
... IHAMHHEQDMRKMGGWLKKIPLTYALMMIGTLALT--GFPY-----
... LAGWWSKDAILESAAHTGVGTFAWVIGLIAAFMTTFYSFRLVFMTFHGKPH---DEHHYDHA-----
... -----
... HEAPWFMRAPNLLLAVGALLAGYLGHGIIIEAG-----WF--
... KDAIFLAEGHDALAHAAHAPAHVKWLPFVMFLGGLFLALLMYIWV-----
... -----
... PTLPKKVSELCPRGYQFLLNAWYFDKLYDAIFIKPAKAIGKGLWQT--GDATIIDGYGVNGTA-
... NLMVRMGAVLKRMSQSGYVYHYAFAMLAGVLVLITFYA-----
3 >WP_011715163_NuoL_Magnetococcus_marinus
4 MST-----YKLIVLLPLLGLSIAGLLG----RTIGTRMSQMTIGGIGLSLLLISIQAFWQIAV--NDGE-
... VVREIFWSWVISGDFQVTLGVLVDRLTAVMLIVVTGVSTLVHIYSVDYMHEDPD-----
... NPRFFSYLSLFSFAMLMVLTSPNFLQLFFGWEGVGLASYLLIGFWFKKESACNAAIKAFLVNRVGDGFGFALGVL
... AIFMVFGLTDY--SAVFGAARGEFNQT----
... MHFLGYEFTTITLICLLLFLGAMGKSAQLFLHTWLPDAMEGPTPVSALIIHAATMVTAGVFLVCRASPLFELSET
... ALAVVTIIGALTAFFAATVGMVQNDIKRVVAYSTCSQLGYMFFAAGVSAYAASMFHLMTHAFFKALLFLGAGAV
... IHAMHHEQDMRKMGGWLKVIPLTYGLMMIGTLALT--GFPG-----
... LAGFFSKDAILESAYAAHSATGTFAFWLGIMAAGMTTFYSFRLVFMTFHGKPK---DHHAYDHA-----
... -----
... HEAPWFMRGNIALAIGALFAGYLGVPLIEAG-----WF--
... KEAIVLAAGHNALEHAHHVPAWVKWLPFVMFVLGLSVAVVLYVLA-----
... -----
... PTLPAKIAQMCPRGYNFLLNAWYFDKLYDKL FVKGAQCLGQGLWKT--ADETIVDGYGVNGWA-
... RTLGRWGASLRRMQSGYVYHYAFAMFVGVLALATFYS-----
5 >WP_068489994_NuoL_Magnetospirillum_marisnigri
6 MI-----TATVFLPLLGAAVAGLLG----RFIGDRGAQILTCGLLLISAVLAGLIFQTVAL--GHQP-
... QTVVIA--DWITSGTFNVAWTLKVDTLTAVMLIVVTWVSAAVHVYSVGYMSHDTS-----
... IARFQSYLSLFTFAMLMVLTSDNLVQMFFGWEGVGVASYLLIGFWYKPSASAAAIAFVNRVGDGFGFALGIF
... GYVFMFGTVGF--DAIFAAAPDKAAAT----
... VTFFGVVEWHAITICLLL FVGAMGKSAQLGLHTWLPDAMEGPTPVSALIIHAATMVTAGVFMVARMSPLEFSDT
... ALTVVTVVGAATAIFAATVGCVQNDIKRVIAYSTCSQLGYMFFAIGVSAYQAAIFHLMTHAFFKALLFLGAGSV
... IHAMSDEQDIRRMGGIWKHVKTWVLMWIGSLALA--GIPV-----
... FAGYYSKDTILEAAWASHSIAGQGAYWLGCTAAFLTAFYSWRLLLLLTFHGRPR--ADEHVMAHV-----
... -----
... HESPAVMLIPLLFLALGAVFAGWLGVDL FVGH--HNAE----FW--
... GKSILVTAHPSLENAHHVPSWAALLPTVVAVSGIALAYLLYSFA-----
... -----
... PGIPGALAKAFQPIYLFLLNKWYFDELYDKIFVKPAFKLGKGLWQG--GDGALIDGVGPDGVA-
... AGTLAVARKVGRMQSGYLYHYAYAMLIGVAVFVTWYVFNAR-----
7 >WP_014745483_NuoL_Tistrella_mobilis
8 MY-----VALILLPLAAAI VAGFFG----RVIGDRGSQLVTTGAVGLAALLSVVAFFDVAV--GGNA-
... TTVNLF--TWIRSGELAFSWALRIDSLTAVMLIVVNGVSFMVHIYSIGYMSHDPH-----
```

```
8... KPRFMAYLSLFTFAMLTTLVTADNLVQMFFGWEGVGLASYLLIGFWYKRPSANKAAMKAFVNVNRVGDGFGSLGIF
... ALFFVTGSVGF--DAIFADLGTVAGTS----
... IDFLGMTLPTIEVIAVLLFIGAMGKSAQLGLHTWLPDAMEGPTPVSALIIHAATMVTAGVFMVARLSPVFELTSF
... TSDMITVIGASTAFFAATVGLTQTDIKRVIAYSTCSQLGYMFFAAGVGAYPAAIFHLMTHAFFKALLFLGAGSV
... IHAMSDEQDMRKMGGIWKLIPTVYTFMWIGSLALA--GLPP-----
... FAGFFSKDMILETAYAAHTGVGAYAFWLGIAAAFMTAFYSWRLLFMTFHGKPR--ADKHTMDHV-----
... -----
... HESPLVMTAPLFPPLAVGAIVAGYIGLPMVDPE-LH-----FW--
... NGAITMLGEHNILEEAHHVPGWVKLLPLVMSVGGIALAWFLYIRR-----
... -----
... PDLPGKIARDFSGLHKFLLNKWYFDELYDAIFVRPSLWIGRVLWQA-GDRKIIDGLGPDGIA-
... AVSVDLARRAGRMQSGYVYHYAFAMLIGLALIVSYF-FGLEA-----
9 >WP_188574487_NuoL_Tistrella_bauzanensis
10 MY-----VALILLPLAAAIVAGFFG----RVLGDRGSQFVTTGAVGLAALLSVVAFFDVAV--YGNA-
... TTIELF-TWIRSGGLDFAWALRIDALTAVMLIVVNGVSFMVHLYSIGYMSHDPH-----
... KPRFMAYLSLFTFAMLTTLVTADNLVQMFFGWEGVGLASYLLIGFWYKPSANKAAMKAFVNVNRVGDGFGSLGIF
... GVFLVTGSVTF--DAVFGELGNVAGTT---
... IDFLGMSLPTIEVLGVLLFIGAMGKSAQLGLHTWLPDAMEGPTPVSALIIHAATMVTAGVFMVARLSPLFELTVF
... TSDMITVIGASTAFFAATIGLTQTDIKRVIAYSTCSQLGYMFFAAGVGAYPAAIFHLMTHAFFKALLFLGAGSV
... IHAMSDEQDMRRMGGIWKLIPTVYMMMWIGSLALA--GIPP-----
... FAGFFSKDMILETAYAAHSTVGAYAFWMGIAAAFMTAFYSWRLLFMTFHGKPR--ADKHTMEHV-----
... -----
... HESPLIMTVPLFLLAVGAITAGYIGQPMVDAG-LA-----FW--
... NGAITMLGEHNILEEAHHVPGWVKLLPLVMSAAGIGLAWLFYIRR-----
... -----
... PDLPGKVASDFSGLYKFLNKWYFDELYDAIFVRPALWIGRVLWQG-GDRRIIDGFGPDGIA-
... AVSLGLARRAGRMQSGYVYHYAFAMLIGLALIVSYFFFGLEAGW-----
11 >WP_074766735_NuoL_Magnetospirillum_fulvum
12 MTV-----IATVFLPLLGAAGLFG----RVLGARGSQIVTTGLLMMAAVSAAMVFDRVAL--GGQT-
... ETVILA-DWIKSGGLELSWALKVDTLTAVMLVVVTWVSAAVHLYSIGYMAHDPS-----
... IPRFQAYLSLFTFAMLMMLVTADNLVQLFFGWEGVGLASYLLIGFWYKPSASAAAIAKAFVNVNRVGDGFGFLGIF
... GLFALFGTIGL--DAIFAAP-AKAGAT---
... LTVLGLKINAITVCLLLLFVGAMGKSAQLGLHTWLPDAMEGPTPVSALIIHAATMVTAGVFLVARMSPLELSDA
... ALAVVTVVGAATAIFAATIGCVQNDIKRIIAYSTCSQLGYMFFALGVSAYQAAIFHLMTHAFFKALLFLAAGSV
... IHAMSDEQDIRRMGGIWKHKVKTWALMWVWGLSLALA--GIPF-----
... FAGYYSKDIILEAAWAAGTPVGQIAYWVGLLAAVLTAFYSWRLLLLTFHGRPR--ADEQVMAHV-----
... -----
... HESPAVMIVPLLFLGAGAMFAGWIGYDLFVGP-ASHD---FW--
... GHALTVADIHPALDNAHHVPEWVALMPTIAAAGGIATAYLLYVFA-----
... -----
... PSLPGMLAGAFPGLHRFLLNKWYFDELYDAILVRPAFRLGRGLWKG-GDGALIDGLGPDGVA-
... ATSIRMGRKVAAAETGYLFHYAFAMLIGVAALVTWYMAFKN-----
13 >WP_046021349_NuoL_Magnetospira_sp._QH-2
14 MY-----AAIVFLPFLAFLIAGILAFVTPKHRIDRNAQWVTSGSLVISWILSIFAFIDVAL--GGNP-
... VTIELF-RWISGSMDSWALKVDTLTAVMLIVVTTVSAMVHIYSIGYMHDPD-----
... VPRFMAYLSFFTFCMLMLVTADNLLQMFFGWEGVGVASYLLIGFWYDKPSANAAAIAKAFVNVNRVGDGFGFALGIF
... GTFLLFDTISL--DAIFAAPVPGKADTM---
... LEVFGMEVHALTALCLLLLFGAMGKSAQLGLHTWLPDAMEGPTPVSALIIHAATMVTAGVFMVARLSPMFEFSET
```

```
14... ALMVVTVYGAFATAFFAATVGLVQNDIKRVIAYSTCSQLGYMFFACGVSAYSAGIFHLMTHASFKALLFLGAGSV
... IHAMSDEQDMRRMGGIWKMPMTYILMWIGSLALA--GVPP-----
... FAGFFSKDMILESAGWAHSSVGNLAFWLGVAAAFMTAFYSMRLMMTFHKGPR--ADETTMAHV-----
... -----
... HESPKVMILPLLVLAAAGIAGYMGYEFVGH-DAAA---FW--
... GNAIYVAEHHQALENAHHAPGWVKLLPLVMGVSGLGFLFYGPM-----
... -----
... SSMPGWLVTNFRSVYDLLLNKWWFDELYDFLFVRPAFKLGRGFWK-GDGAVIDGCGPDGIA-
... SGVLRWVRRATSMQTGFVYHYAFSMLIGVAGLVTWYLFTLG-----
15 >WP_007089417_NuoL_Thalassospira_xiamenensis
16 MY-----PLIVFLPLIAATIAGIIDHHHGVTSDRISQLITVGGVTAFIISIFAFVDVAL--GNP-
... VTVQLF-TWISSGNFTAEWALRFDTLTCVMLIVVTGVSSMVHIYSIGYMSHDPD-----
... KPRFMAYLSLFTFAMLMLVTADNLIQLFFGWEGVGLASYLLIGFWYSKPSASAAAIKAFVVRVGDGFGFALGIF
... AVYVLFDSVQF--DVIFANAEEVAGTT---
... LLFLGHEFSALEITCFLFIGAMGKSAQLGLHTWLPDAMEGPTPVSALHAATMVTAGVFMVARLSPIFEYAET
... TLAITVVGASTAFFAATIGCVQNDIKRVIAYSTCSQLGYMFFACGVSAYSAGVFHLMTHGFFKALLFLGAGSV
... IHAMSDEQDMRKMGGIYKMPVPLTFVMMVGTLAIT--GFP-----
... LAGFYSKDLVIESAFAAHTAVGTYAFWAGILALMTSFYSWRLIFMTFFGTTPR--ADERTMAHV-----
... -----
... HESPAVMTLPLLFLTIGAIFAGWFAKDFGGG-DYEEMLAFW--
... NGAIFMAEGHQALEHAHHVPGWVKLAPFVAMVSGFVIALVMYKLV-----
... -----
... PSLPRQLANTFNGLYRFALNKWYFDELYDKIFVKPAFYLYGYFWKS-GDGALIDGVGPDGVA-
... AACRNIARRVSALQSGFVYHYAFAMLIGIAALVSYTIWKMG-----
17 >WP_073954579_NuoL_Thalassospira_sp._TSL5-1
18 MY-----ALIVFLPLIAAIIAGLIDHHHGVTDDRLSQLVTVAGVVIAAALSVAAFIEVAL--NGNP-
... VTLDLF-TWISSGDFTANWSLRFDTLTCVMLIVVTGVSSMVHIYSIGYMSHDPD-----
... KPRFMAYLSLFTFAMLMLVTADNLIQLFFGWEGVGLASYLLIGFWYSKPSASSAAMKAFIVNRVGDGFGFALGIF
... AVYVLFGTVQF--DTIFANAEEISGST---
... LVFLGHDFSALNIATFLLFIGAMGKSAQLGLHTWLPDAMEGPTPVSALHAATMVTAGVFMVARLSPIFEYAET
... TLAIVTVGATTAFFAATIGCVQNDIKRVIAYSTCSQLGYMFFACGVSAYSAGVFHLMTHGFFKALLFLSAGSV
... IHAMSDEQDMRKMGGIWKMPVPLTFGVMIIGTLAIT--GVP-----
... FAGYYSKDMIIESAFAAHTSVGLYAFWGVIAAFMTSFYSWRLIFMTFFGAPR--ADERTMAHV-----
... -----
... HESPAVMTVPLLILAVGAVFAGWFAVNWFGGN--YEEMLSFW--
... NGAIFVAENHQALEHSHHVPEWVKMAPFVAMMLGLALAVLMYRLV-----
... -----
... PSLPRMLANTFNGLIYRFLLNKWYFDELYDAIFVKPAFALGRGFWKA-GDGALIDGVGPDGVA-
... AACRNIARRISTLQSGFVYHYAFAMLIGIAALVSYTIWKMG-----
19 >WP_189051263_NuoL_Aliidongia_dinghuensis
20 MA-----TAIVFLPLIAAIIIVGLLG----RTLGDVRSQLITCGCVLVAAALSVLVFKDVAL--DHHT-
... QTISLL-NWIDTGPLSVDWAIRLDTLAVMLIVVTGVSSMVHVYSIGYMSHDHS-----
... IPRFMAYLSLFTFAMLMLVTADNLVQMFFGWEGVGLASYLLIGFWYDRPSANAAAIAKAFVVRIGDFGFSGLGIF
... AAFFLFGTLQF--DQIFAAAPGAVGKT---
... FHFLSWDVDALTCTSILLFIGAMGKSAQLGLHTWLPDAMEGPTPVSALHAATMVTAGVFMVCRLSPLLEYSND
... ALHFIAIIGAATAIFAASVGMAQNDIKRVIAYSTCSQLGYMVFAGVSAIPAAMFHLATHASFKALLFLSAGSV
... IHAMSGEQDMRKMGGGLWKLIPVTYVMMWIGNLALA--GIPP-----
... FAGYWSKDTIIEAAYAAGTPYGHFAYWLGIAAAFLTSFYSWRLIFMTFFHKGSR--ADHHTLEHV-----
```

```
20... -----  
... HESPMVMVPLIVLAIGAVFAGWLGNAADFVGE--GLKE----FW--  
... GKSILILDSHPGLAAREEIPPLMSYMALIVGVAGIVLAWVFYVAV-----  
... -----  
... PSLPGAFTSAAKTLYLACLNKWYFDEIYDFLVVVKPAMWLGWGLWKG--GDGMIIDGLGPDGVA--  
... AVTRGLSRRASKLQTGYVYHYAFAMLIGVLCLVSWYLLSQR-----  
21 >WP_088150318_NuoL_Inquilinus_limosus  
22 MD-----IAAIFLPLAGFLIAGLFG----RLIGDRASMAVTTLAVCVAALISWWLFFDVAI--DGNV--  
... RTHSLL-LWINSGTFFVADWALKFDTLTAVMLIVVNTVSAMVHIYSIGYMSHDHS-----  
... KPRFFAYLSLFTFAMLMLVTADNLIQLFFGWEGVGLASYLLIGFWYEKESARAAVKAFLVNRVGDGFGFALGIF  
... AVYKIFGTVRY--EEIFAVP--HMVDAR---  
... INFLGMDLPALTTACLLL FVGAMGKSAQLGLHTWLPDAMEGPTPVSAL IHAATMVTAGVFMLARMSPLFEYAPD  
... ALAVVCVVGALTAFVAATIGLTQFDIKRVIAYSTMSQLGYMFFAIGVSAYQAAIFHLMTHAFFKALLFLGAGSV  
... IHAMGGEQDMRKMGGIWRLIPTTYALMWIGSLALAGIGIPGV-----  
... FGFAGFYSKDMILEAAWAHSGVGNLAYWLGVIAALMTAFYSGRLLFLTFHGKPR--ADHHTMEHA-----  
... -----  
... HESPPVMLVPLIVLAAGAVLAGVIGFGIFVGD--GREG---FW--  
... REAILVLHGQDSIEAAHHAPEWVSLPLL LAGLVGLGASWLFYIQS-----  
... -----  
... PGLPGAVVRAFKPIHQLFFRKWYFDEIYDALLVKPAFVLGRVFWKA--GDGAIIDRLGPDGVA--  
... ATSIGIARRASRLESGYVYHYAFVMVIGVVALVSWYVFGGRI-----  
23 >WP_088873694_NuoL_Nitrospirillum_amazonense  
24 MAV-----IAAIFLPLLAFFIAGFFG----RRIGDLGSQVLTTCAMVAALVLSIILFIDVAV--NGHA--  
... TVVPLANWVASGDFHVDWALRVDTLTAVMLIVVNGVSTMVHIYSVGYMSHDPD-----  
... KPRFMSYLSLFTFMMLMLVTSNLLQMF FGWEGVGVASYLLINFWFEKKSANDASMKAFLVNRVGDGFGFALGIF  
... SIFIIFGSVEF--GTIFPAAAGKAHAT---  
... FNFLGWVHSALDCACLLL FVGAMGKSAQLGLHTWLPDAMEGPTPVSAL IHAATMVTAGVFMLARMSPVFEYAPT  
... ALAVVTVLGALTAFVAATIGMTQFDIKRVIAYSTMSQLGYMFFAIGVSAYQAAV FHLMTHAFFKALLFLGAGSV  
... IHAMSGEQDMRKMGGIARLIPFTYVVMWIGNLALAGVGIPGV-----  
... YGFAGFYSKDIVLEAAYGSGTAVGHFAYWLGIAAAFMTAFYSWRLIMTFHGKPR--ASKEVMDHV-----  
... -----  
... HESPLVMTGPLTVLAIGALVAGIGGYEWFVGHAAARAE---FW--  
... RGAIQVLHAHDSIHAAHEGPEWVGLLPLL VGLAGIALAYVCYMFV-----  
... -----  
... PGIPATFTKIVKPLHVLVFNKYFFDQIYDVLVFKPAQVLGFGLWKA--GDGAIIDGLGPDGVA--  
... KTRRGVAAGVSRQLQSGYVYHYAFAMVIGVVALVGVWFYFKP-----  
25 >WP_184800291_NuoL_Nitrospirillum_irisidis  
26 MAV-----IAAIFLPLLASFIAGFFG----RRIGDRGSQFVTCAAMLVALGLSIHLFIDVAI--NGHA--  
... QIVTLA-NWVASGAFHVDWALRVDTLTAVMLIVVNGVSTMVHIYSVGYMSHDPD-----  
... KPRFMSYLSLFTFMMLMLVTSNLLQMF FGWEGVGVASYLLINFWFEKKSANDASMKAFLVNRVGDGFGFALGIF  
... TVFVIFGTVEF--KPIFAAA--SQAHAHAT---  
... FNFLGWNVSALDCACLLL FVGAMGKSAQLGLHTWLPDAMEGPTPVSAL IHAATMVTAGVFMLARMSPVFEYAPT  
... ALAVVTVVGALTAFVAATIGMTQFDIKRVIAYSTMSQLGYMFFAIGVSAYQAAIFHLMTHAFFKALLFLGAGSV  
... IHAMSGEQDMRKMGGIWKLIPTTYAVMWIGNLALAGVGIPGV-----  
... YGFAGFYSKDIILEAAYGSGTAVGHFAYWLGIAAAFMTAFYSWRLILTFHGKPR--ATKDVMDHV-----  
... -----  
... HESPVVMTGPLTVLALGALVAGIGGYEWFVGHARAEG--FW--RGAI--  
... QVLHAHDSIHAAHEGPEWVGLVPLL VGLTGIGLAYVCYMFV-----
```

```
26... -----PGIPATFTRVVKPLHTLVFNKYFFDQIYNALFVKPAQLLGYGLWKG-
... GDGAIIDGLGPDGVA-KTTRGIAGGVSRLQSGYVYHYAFAMVIGVVALVGWFYFKP-----
27 >WP_207478836_NuoL_Desertibacter_SYSUD00532
28 ME-----VLAIFLPLLGAFFIAGFFG----RWIGDRGAQIVTCAGLIVSAMISIWLFNDIAL--GGNP-
... RTVELF-TWMDSGALEVSWSLRDLSTAVMLIVVTVVSSCVHVYVSGYMSHDHS-----
... IPRFMAYLSLFTFFMLMLVTADNLLQMFFGWEGVGLASYLLINFWYEKPSANAAAMKAFIVNRVGDGFGFALGIM
... ATFAIFGTIQF--DAIFGAVPQAANQD---
... MNFLGFQAHALTVTCLLLFMGAMGKSAQLGLHTWLPDAMEGPTPVSALIIHAATMVTAGVFMVCRLSPMFEYAPA
... ALAVVTIVGALTAFVAATIGFTQFDIKRVIAYSTMSQLGYMFFAAGVSAYGAAMFHLMTHAFFKALLFLGAGSV
... IHAMSDEQDMRRMGGIWKMIPTTYAMMWVGSLLALA--GIPV-----
... FAGYYSKDMILEAAYADHSVAGTLAFWLGIAAAFLTAFYSWRLIIMAFHGKPR--ADEKTMAHV-----
... -----
... HESPLVMTLPLLVLAI GAVFSGMVAYGWVGE--GRAE---FW-
... KGRAILVLHENDTVEAAHHVPGWVPLAPLVVALAGIATAYVFYMF-----
... -----
... PDLPGALAQRFAGLHRFLYNKWFDELYDRIFVRPAKALGFGLWQA-GDRAVIDGVGPDGVA-
... AATRGMAARAARLQSGYVYHYAFAMVVGVVVLVGWFYLRG-----
29 >WP_094456846_NuoL_Niveispirillum_lacus
30 ME-----IAAIFLPLAGAFIAGFFG----RLIGDRGAQIVTCAGVLIAAVLSVILFIKVG--
... GGPEAARTVELFTWIDSGTFEVSWSLRIDTLTAVMLVVVNVVSSMVHVYVSGYMSHDPH-----
... RARFMAYLSLFTFMMLMLVTADNLLQMFFGWEGVGVASYLLINFWYEKKSANDASMKAFLVNRVGDGFGFALGIM
... AIYMIFGTVEF--DGIFAQAASKADAT---
... FNFLGWVHALTCACLLLFIGAMGKSAQLGLHTWLPDAMEGPTPVSALIIHAATMVTAGVFMFLARMSPVFEYAPT
... ALEVVTYLGAATAFVAATIGLTQFDIKRVIAYSTMSQLGYMFFAIGVGAYPAAIFHLMTHAFFKALLFLGAGSV
... IHAMSDEQDMRNMGGIWKLIPTTYMMWIGNLALA--GIPF-----
... FAGFYKDMILEVAYAKHSAAGSFAFWMGIAAAMTAFYSWRLIMTFHGKPR--ASEKVMAHV-----
... -----
... HESPAVMLVPLVVL SIGALFAGFVAYPWVFGH--DMNA---
... FKAGSIVMLTGEHGSIIIEAAHHVPGWVVPYAPLVAGVSGIVLAYVFYMF-----
... -----
... PGLPGAFVNTFKALHAFVFRKYMFEDELYDALFVRPAMKLGFGWLWKG--VDIGVIDGLGPDGAA-
... AVTRRLSLASSRVQSGYVYHYAFVMVIGVVALTGWFILAR-----
31 >QJE72753_NuoL_Rhodospirillaceae_B3_Rhodocista
32 ME-----IAAIFLPLLGAFFIAGFFG----RQIGDRGAQIVTCAGVLVA AVLSCILFAQIGF--
... GGPEAARTVELFTWIDSGSFEVSWALRMDTLTAVMLVVVNVVVSAMVHVYVSGYMSHDPG-----
... KARFMAYLSLFTFMMLMLVTADNLLQMFFGWEGVGLASYLLINFWYEKTSANNASMKAFLVNRVGDGFGFALGIM
... AVFVIFGTVQF--DEIFAQAASKADAS---
... FNFLGFQVHALTCACLLLFIGAMGKSAQLGLHTWLPDAMEGPTPVSALIIHAATMVTAGVFMLSRMSPVFEYAPD
... ALAVVTVVGGLTAFLAATIGMTQFDIKRVI AFSTMSQLGYMFFAIGVGAYPAAIFHLMTHAFFKALLFLGAGSV
... IHAMSDEQDMRNMGGIWRMIPTTYAMMWIGNLALA--GIIP-----
... FAGYYSKDMILEVAYADHSWYGTAFWLGMAAALMTAFYSWRLLLLTFHGQPR--ANEKVMAHV-----
... -----
... HESPLVMTAPLAVLAVGAVFSGLVAYEWFVGH--DMAH---
... FWSGSITMLAGEHGTIIDAHHVPGWVPLAPLAMGILGIALAYVFYMF-----
... -----
... PDLPGKFVNSFRL LHGIVFRKYYFEDELYDALFVRPSMKLGYGLWKG--GDQAVIDGFGPDGAA-
... SVTRGLSAVTSRLQTGYVYHYAFVMVIGVVALVGWFYLR-----
33 >WP_014102898_NuoL_Micavibrio_aeruginosavorus
```

```
34 ME-----LIAVFAPLLGFVIAFLFG----KQIGDKGAQFVTCTGLIMAAVASC SLFY SVII--QSQP-
... HVVSLE-NWITVGDFTVDWALRFDQLSVMMCVINIVSACVHVY SVGYMSHDPC-----
... KARFMSYLSLFTFAMLMLVSADNLVQLFFGWEGVGLASYLLIGFWNHKHSANAAAVKAFV VNRV GDFGLALGIF
... TIFMVFQTVQF--QGI FDQAAQHKDTM---
... FMFLGYEVHALTLACL LLMFGAVGKSAQLGLHTWLPDAMEGPTPVSAL IHAATMVTAGVFLVSRFSPVFEYAPT
... ALMVVCI FGAVTALVAATIGLTQFDIKRVIAYSTMSQLGYMFFALGVSAYPAAMFHLTTHAFFKALLFLGAGSV
... IHAMSDEQDMRKMGGIWHLIPSTYILMWVGLSLALA--GMPF-----
... FAGYYSKDMILETAFADHTWFGTMAYWFGIVAALLTAFYSWRLILMTFHGKPR--ADEKVMAHV-----
...
... HESPLIMLLPLTVLAAGAILAGSVLYGGFV GSPNAAWDKHFV--
... GGSIFVLPENDTVEAAHHVPTWVKVLP I FVASAGIILAYIFYMFA-----
...
... PNMP SVMVKVFKPIHALFY NKWV FDELYDRV FTRNAFRLGRFFWQK-GDKAVIDGYGPDGVA-
... SMYARFAGVLSRFQTYGVFQYAFVMMIGLIGLVSWFVFRATMGQ-----
35 >WP_044426151_NuoL_Skermanella_aerolata
36 ME-----IAAIFLPLLAFFIAGFFG----RLIGDRGSQYITSGAVLLSALLSIWLFVDVAL--HGNA-
... RTIELF-TWIDSGT FEVSWALKFDTLTAVMLIVNVVSSMVHVYSIGYMSHDH-----
... KPRFMAYLSLFTFFMLMLVTADNFVQMYFGWEGVGVASYLLINFWYEKPSANNASMKAFIVNRV GDFGFALGIM
... AIFYLFGSVHF--DTVFAAAASKAGQT---
... MNFLGFNLDALTVACL LLMFGAMGKSAQLGLHTWLPDAMEGPTPVSAL IHAATMVTAGVFMVARLSPIFEYAPI
... ALNVIAIVGASTAFVAATIGLTQYDIKRVIAYSTMSQLGYMFFALGVSAYSAAAMFHLMTHAFFKALLFLGAGSV
... IHAMSDEQDIRKMGGVWRLIPITYAMMWIGSLALA--GIPF-----
... FAGYYSKDMILEAAYAHSVGVGAYAFWLGI AALMTAFYSWRLIILTFHGRPR--ANDRVM AHV-----
...
... HESPAIMTVPLAVLAVGALFSGMFAYNWFVGE-GREA---FW--
... GEAIFVLHEHDTVEAAHHVPSWVPLAPFIAGVIGIALAYLFYMFV-----
...
... PQLPGIVTNALGGVYRFVYRKWV FDELYDRLFVQPARYLGYGLWKS-GDGAIIDGVGPDGIA-
... AATRDVAFRAARLQSGVYHYAFVMVIGVLLVGVW-FYF-FG-----
37 >WP_123688416_NuoL_Stella_humosa
38 MF-----AAAI FLPLLGAI VAGFFG----RWIGDRGAQIVTCAGLLISMLL GWYILYLVGF--RGET-
... RTVELF-TWISSGT FEVAWALRFDTLTAVMVVTTVSAMVHVY SVGYMSHDHS-----
... IPRFMAYLSIFTFFMLMLVTADNFVQMFFGWEGVGVASYLLIGFWFDRQSANAAAMKAFIVNRV GDFGFALGIM
... AIFYLFGTVQF--DAVFQAAPQMAGR N---
... FEFLGMQVDALTTACILLF IGAMGKSAQLGLHTWLPDAMEGPTPVSAL IHAATMVTAGVFMLCRLSPVFEYAPT
... ALAIVTLVGATTAIFAATVGLTQFDIKRVIAYSTCSQLGYMFFAIGVSAYQAAIFHLMTHAFFKALLFLGAGSV
... IHAMSDEQDMRRMGGIWRLIPTTYTLMWIGSLALA--GLPF-----
... FAGFYSKDIILEAAFGAHSVGVGQYAFWLGI LAALLTAFYSWRLFLTFHGKPR--ANEKVMAHV-----
...
... HESPPVMIVPLVVLALGALFSGWLAYEAFVGH-DQKA---FW--
... GASIFVASHHDPLEAAHHVPGWVKLLPIFVAVAGIALAWIAYIAR-----
...
... PDLPRLAAEALRPVHRFFFNKWFYFDELYDRIFVRPSFYLGRGLWKT-GDGALIDGVGPDGVA-
... AATQAMSIRASRLQTYGVYHYAFAMLIGVVLLVSWYLYVRI-----
39 >MBT5660202_NuoL_partial_Rhodospirillaceae_SI073_bin103_UBA11136
40 -----
... -----VHVYSIGYMAKDDA-----
... IPRFFAYLNLFTFFMLMLVTADNMVQLFFGWEGVGLASYLLIGFWYKRPAANAAAVKAFV VNRV GDFGFALGIF
```

```
40... AIFLLFGSVNF--GEIFAAAPHHAEAT---  
... MSFLGFDFHAYTIICLLLFMGAMGKSAQIGLHIWLPDAMEGPTPVSALIIHAATMVTAGVFMVVRLSPLFEYAPG  
... VLNVIADVGGTTAFFAATIAITQNDIKKVIAYSTCSQLGYMFCIAIGVSAYGAAIFHLMTHAFFKSLFLCAGSV  
... IHAMSDEQDMRKMGGIWRKVPVTTYMMWIGSLALA--GVPF-----  
... FAGYYSKDMILEAAWGAHSLPGGYAFLMGTIAAFLTAFYIFRLIFLTFHGEPR--ADEKVMAHI-----  
-----  
... HESPKSMTVPLVVLAVGAIFAGYLGYSDFVGE-GEKA---FW--  
... GTSILVLDSTHALIDGHHAPFGIKILPVILGALGILLAYITYFMF-----  
-----  
... PGLASHAAERFPGLYAFLYNKWYFDELYDRLIVKPALVLGRGLWKS-GDGEVIDGVGPDGIA-  
... ASVIALGRRIAGIQSGYVYHYAFAMIIGIAGILTCFLYASVG-----  
41 >MBL6935107_NuoL_Alphaproteobacteria_BS150m-G7_UBA11136  
42 LY-----VATIFLPLIGAIAGLFG----RWVGDRAQLIACGMMVLSGLFSIIIFRDVAL--DGNE-  
... RVIELF-TWIRSGGFEASWALKFDLTSVMVFVSVVSALIIHIYSIGYMAKDPS-----  
... IPRFFSYLSLFTFFMLMLVSADNLVQLFFGWEGVGLCSYLLIGFWYDRDSANAAAIAKAFVLRIGDFGFALGIF  
... AVFYLFGSVSF--ETIFAAAPAQAETS---  
... FEFLGLEVHALTLICLLLFIGAMGKSAQIGLHVWLPDAMEGPTPVSALIIHAATMVTAGVFMVVRMSPLFELAPS  
... VLALVAVIGALTAFMAGTIALAQNDIKRVIAYSTCSQLGYMFFAIGVSAYGAAIFHLMTHAFFKSLFLGSGSV  
... IHAMSDEQDMRKMGGIWRKIPLTYAVMWVGSALV--GIPF-----  
... FAGYYSKDIIIESAWGAHSLVGNFAYVIGVVVAFLTAFYSCROLLFMTFHGEPR--ADEKVMAHV-----  
-----  
... HESPKVMTVPLVLLAVGAIFSGSLGYDLFVGD-GGEG---FW--  
... RASILVLPGHDALEAHHAPWYIKLTPLVLAFLGMALAFVYFMF-----  
-----  
... PGLAGHAAERFPRVHAFLYNKWFDEIYDRLIVRPAALILGRGLWKS-GDGELIDGIGPDGIA-  
... ASVMMGRRAAALQSGYVYHYAFAMIIGVVGFIWYLYGLMG-----  
43 >MAG23701_NuoL_Rhodospirillaceae_ARS27_o_UBA1136  
44 LY-----VATIFLPLIGAVVAGLGC----RWTGDRGAQLVTCGLMVLSGLFSIVIFREVAL--DGNE-  
... RAIELF-TWIRSGGLEAAWALKFDLTVAMVFVSVVSALIIHIYSIGYMAKDPS-----  
... IPRFFSYLSLFTFFMLMLVSADNLVQLFFGWEGVGLCSYLLIGFWYDRDSANAAAIAKAFVLRIGDFGFVGLGIF  
... AVFYLFGSVNF--ETIFTAAPDQAETT---  
... FEFLGLEVHALTLICLLLFIGAMGKSAQLGLHVWLPDAMEGPTPVSALIIHAATMVTAGVFMVVRMSPLFELAPL  
... VLALVAVVGALTAFMTATIALAQNDIKRVIAYSTCSQLGYMFFAIGVSAYGAAIFHLMTHAFFKSLFLGSGSV  
... IHAMSDEQDMRKMGGIWRRIPLTYTVMWVGSALV--GIPF-----  
... FAGYYSKDIIIESAWAAHG VGNFTYILSVVAFLTAFYSYRLLFMTFHGESR--ADERVMAHV-----  
-----  
... HESPKVMTVPLVLLSVGAIFSGYLGYSDFVGD-GGEE---FW--  
... RASILVLPGHDALEAHHVHWYIKIVPLVMAGLGILLAFVYFMF-----  
-----  
... PGLAGHAAERFPRLHTFLYNKWFDEYDRLIVRPAALAFGRALWKT-GDGELIDGIGPDGIA-  
... ASVMMGRRAAALQSGYVYHYAFAMIIGVVGFIWYLYELAG-----  
45 >MDP7045168_NuoL_Alphaproteobacteria_Arabian9_MAG_19  
46 LY-----VATIFLPLIGAVVAGLGC----RWTGDRGAQLVTCGLMVLSGLFSIVIFREVAL--DGNE-  
... RAIELF-TWIRSGGLEAAWALKFDLTVAMVFVSVVSALIIHIYSIGYMAKDPS-----  
... IPRFFSYLSLFTFFMLMLVSADNLVQLFFGWEGVGLCSYLLIGFWYDRDSANAAAIAKAFVLRIGDFGFVGLGIF  
... AVFYLFGSVNF--ETIFTAAPDQAETT---  
... FEFLGLEVHALTLICLLLFIGAMGKSAQLGLHVWLPDAMEGPTPVSALIIHAATMVTAGVFMVVRMSPLFELAPL  
... VLALVAVVGALTAFMTATIALAQNDIKRVIAYSTCSQLGYMFFAIGVSAYGAAIFHLMTHAFFKSLFLGSGSV
```

```
46... IHAMSDEQDMRKMGLWRRIPITYVMWVWVGLALA--GIPF-----  
... FAGYYSKDIIIESAWAAHGVVGNFTYILSVVVAFLTAIFYSRLLFMTFHGESR--ADERVMAHV-----  
...  
... HEAPKVMTPVPLVLLSVGAIIFSGYLGVDLFDVGD--GGEE----FW--  
... RASILVLPGHDAEAHHPRIYIKIVPLVMAGLGILLAFVVFYFMF-----  
...  
... PLAGHAAERFPRLLHTFLYNKWFDEVDRLVLRPALAFGRALWKT--GDGELIDGIGPDGIA--  
... ASVMMGRRAAALQSGYVYHYAFAMIIGVVGFIWYLYELAG-----  
47 >MDP7122910_NuoL_Alphaproteobacteria_ETNP8_MAG_36  
48 LY-----VATIFLPLIGAVVAGLCG----RWTGDRGAQLITCGLMVLSGLFSIVIFREVAL--DGNE--  
... RVIELF--TWIRSGGLEAAWALKFDLTAVMVFVVSVALIHIYSIGYMAKDPS-----  
... IPRFFSYLSLFTFFMLMLVSADNLVQLFFGWEGVGLCSYLLIGFWHDRDSANAAAIAKAFVLRIGDFGFVLGIF  
... AVFYLFSGVNF--ETIFTAAPDQAETT---  
... FEFLGLEVHALTLICLLLFIGAMGKSAQLGLHVWLPDAMEGPTPVSALIIHAATMVTAGVFMVVRMSPLFELAPL  
... VLALVAVVGALTAFTATIALAQNDIKRVIAYSTCSQLGYMFFAIGVSAYGAAIFHLMTHAFFKSLFLGSGSV  
... IHAMSDEQDMRKMGLWRRIPITYVMWVWVGLALA--GIPF-----  
... FAGYYSKDIIIESAWAAHGVVGNFTYILGVVVAFLTAIFYSRLLFMTFHGESR--ADERVMAHV-----  
...  
... HESPKVMTVPLVLLSVGAIIFSGYLGVDLFDVGD--GGEE----FW--  
... RASILVLPGHDAEVRYPQYIKIAPLAMAGLGILLAFVVFYFMF-----  
...  
... PLAGHAAERFPRLLHTFLYNKWFDEVDRLVLRPALAFGRALWKS--GDGELIDGIGPDGIA--  
... ASVMSMGRRAAALQSGYVYHYAFAMIIGVVGFIWYLYELAG-----  
49 >MBV23930_NuoL_Rhodospirillaceae_NP1051_UBA11136  
50 LY-----VATIFLPLIGAVVAGLCG----RWTGDRGAQLITCGLMVLSGLFSIVIFREVAL--DGNE--  
... RAIELF--TWIRSGGLEAAWALKFDLTAVMVFVVSVALIHIYSIGYMAKDPS-----  
... IPRFFSYLSLFTFFMLMLVSADNLVQLFFGWEGVGLCSYLLIGFWHDRDSANAAAIAKAFVLRIGDFGFVLGIF  
... AVFYLFSGVNF--ETIFTAAPDQAETT---  
... FEFLGLEVHALTLICLLLFIGAMGKSAQLGLHVWLPDAMEGPTPVSALIIHAATMVTAGVFMVVRMSPLFELAPL  
... VLALVAVVGALTAFTATIALAQNDIKRVIAYSTCSQLGYMFFAIGVSAYGAAIFHLMTHAFFKSLFLGSGSV  
... IHAMSDEQDMRKMGLWRRIPITYXVMWVWVGLALA--GIPF-----  
... FAGYYSKDIIIESAWAAHGVVGNFTYILGVVVAFLTAIFYSRLLFMTFHGESR--ADERVMAHV-----  
...  
... HESPKVMTVPLVLLSVGAIIFSGYLGVDLFDVGD--GGEE----FW--  
... RASILVLPGHDAEVRYPQYIKIAPLAMAGLGILLAFVVFYFMF-----  
...  
... PLAGHAAERFPRLLHTFLYNKWFDEVDRLVLRPALAFGRALWKS--GDGELIDGIGPDGIA--  
... ASVMMGRRAAALQSGYVYHYAFAMIIGVVGFIWYLYELAG-----  
51 >Ga0066848_100310331_ETNP2013_S10_300m_22_NuoL_500aa  
52 -----  
... -----ALIIHSIGYMAKDPS-----  
... IPRFFSYLSLFTFFMLMLVSADNLVQLFFGWEGVGLCSYLLIGFWHDRDSANAAAIAKAFVLRIGDFGFVLGIF  
... AVFYLFSGVNF--ETIFAVAPDQAETT---  
... FEFLGFVHALTLICLLLFIGAMGKSAQLGLHVWLPDAMEGPTPVSALIIHAATMVTAGVFMVVRMSPLFELAPL  
... VLALVAVVGALTAFTATIALAQNDIKRVIAYSTCSQLGYMFFAIGVSAYGAAIFHLMTHAFFKSLFLGSGSV  
... IHAMSDEQDMRKMGLWRRIPITYVMWVWVGLALA--GIPF-----  
... FAGYYSKDIIIESAWAAHGVVGNFTYILGVVVAFLTAIFYSRLLFMTFHGESR--ADERVMAHV-----  
...  
... -----
```



```
52... HESPKVMTVPLVLLSVGAI FSGYLGYDLFVGD-GGEE---FW--  
... RASILVLPGH DALAEAHHVPRYIKIVPLVMAGLG VLLAFVVYFMF-----  
... -----  
... PGLAGHAAERFPRLHTFLYNKWFDEVYDRLLVRPALAFGRALWKS-GDGELID-----  
... -----  
53 >MDP6780196_NuoL_Alphaproteobacteria_Arabian10_MAG_26  
54 LY-----VATIFLPLIGAVVAGLCG----RWTGDRGAQLVTCGLMVLSGLFSIVIFREVAL--DGNE-  
... RAIELF-TWIRSGGLEAAWALKFDTLTAVMV FVSVVSALIH IYSIGYMAKDPS-----  
... IPRFFSYLSLFTFFMLMLVSADNLVQLFFGWEGVGLCSYLLIGFWYDRDSANAAA IKAFLVLRIGDFGFVLGIF  
... AVFYLFGSVNF--ETIFTAAPDQAETT---  
... FEFLGLEVHALTLICLLL FVGAMGKSAQLGLHVWLPDAMEGPTPVSAL IHAATMVTAGVFMVVRMSPLFELAPL  
... VLALVAVVGALTAFMTATIALAQNDIKRVIAYSTCSQLGYMFFAIGVSAYGAAIFHLMTHAFFKSLLFLGSGSV  
... IHAMSDEQDMRKMGLWRRIP LTYTVMWVGS LALA--GIPF-----  
... FAGYYSKDIIIESAWAAHG VVGNFTYILGVVVAFLTAFYSYRLLFMTFHGESR--ADERVMAHV-----  
... -----  
... HEAPKVMTVPLVLLSVGAI FSGYLGYDLFVGD-GGEE---FW--  
... RASILVLPGH DALAEAHVHWYIKIVPLVMAGLG ILLAFVVYFMF-----  
... -----  
... PGLAGHAAERFPRLHTFLYNKWFDEVYDRLLVRPALAFGRALWKT-GDGELIDGIGPDGIA-  
... ASVMMGRRAAALQSGYVYHYAFAMIIGVVG FISWYLYELAG-----  
55 >MDP6660958_NuoL_Alphaproteobacteria_Arabian11_MAG_35  
56 LY-----VATIFLPLIGAVVAGLCG----RWTGDRGAQLVTCGLMVLSGLFSIVIFREVAL--DGNE-  
... RAIELF-TWIRSGGLEAAWALKFDTLTAVMV FVSVVSALIH IYSIGYMAKDPS-----  
... IPRFFSYLSLFTFFMLMLVSADNLVQLFFGWEGVGLCSYLLIGFWYDRDSANAAA IKAFLVLRIGDFGFVLGIF  
... AVFYLFGSVNF--ETIFTAAPDQAETT---  
... FEFLGLEVHALTLICLLL FVGAMGKSAQLGLHVWLPDAMEGPTPVSAL IHAATMVTAGVFMVVRMSPLFELAPL  
... VLALVAVVGALTAFMTATIALAQNDIKRVIAYSTCSQLGYMFFAIGVSAYGAAIFHLMTHAFFKSLLFLGSGSV  
... IHAMSDEQDMRKMGLWRRIP LTYTVMWVGS LALA--GIPF-----  
... FAGYYSKDIIIESAWAAHG VVGNFTYILSVVAAFLTAFYSYRLLFMTFHGESR--ADERVMAHV-----  
... -----  
... HEAPKVMTVPLVLLSVGAI FSGYLGYDLFVGD-GGEE---FW--  
... RASILVLPGH DALAEAHVHWYIKIVPLVMAGLG ILLAFVVYFMF-----  
... -----  
... PGLAGHAAERFPRLHTFLYNKWFDEVYDRLLVRPALAFGRALWKT-GDGELIDGIGPDGIA-  
... ASVMMGRRAAALQSGYVYHYAFAMIIGVVG FISWYLYELAG-----  
57 >MDP7669054_NuoL_Alphaproteobacteria_ETNP2_MAG_74  
58 LY-----VATIFLPLIGAVVAGLCG----RWTGDRGAQLITCGLMVLSGLFSIVIFREVAL--DGNE-  
... RAIELF-TWIRSGGLEAAWALKFDTLTAVMV FVSVVSALIH IYSIGYMAKDPS-----  
... IPRFFSYLSLFTFFMLMLVSADNLVQLFFGWEGVGLCSYLLIGFWHDRDSANAAA IKAFLVLRIGDFGFVLGIF  
... AVFYLFGSVNF--ETIFTAAPDQAETT---  
... FEFLGLEVHALTLICLLL FIGAMGKSAQLGLHVWLPDAMEGPTPVSAL IHAATMVTAGVFMVVRMSPLFELAPL  
... VLALVAVVGALTAFMTATIALAQNDIKRVIAYSTCSQLGYMFFAIGVSAYGAAIFHLMTHAFFKSLLFLGSGSV  
... IHAMSDEQDMRKMGLWRRIP LTYTVMWVGS LALA--GIPF-----  
... FAGYYSKDIIIESAWAAHG VVGNFTYILGVVVAFLTAFYSC RLLFMTFHGESR--ADERVMAHV-----  
... -----  
... HESPKVMTVPLVLLSVGAI FSGYLGYDLFVGD-GGEE---FW--  
... RASILVLPGH DALAEVRHAPWYIKIAPLVMAGLG ILLAFVVYFMF-----  
... -----
```

```
58... PGLAGHAAERFPRLHTFLYNKWFDEVYDRLLVRPALAFGRALWKS-GDGELIDGIGPDGIA-
... ASVMSMGRRAAALQSGYVYHYAFAMIIGVVGFIISWYLYELAG-----
59 >MDP7190726_NuoL_Alphaproteobacteria_ETNP7_MAG_8
60 LY-----VATIFLPLIGAVAVGLLG----RWTGDRGAQLITCGLMVLSGLFSLVIFREVAL--DGNA-
... RTIELF-TWIHSGEFEVSWALKFDTLTAVMVVSVVSALIHIYSIGYMAKDPS-----
... IPRFFSYLNLFTFFMLILVTANNLIQLFFGWEGVGLCSYLLIGFWYDRASANTAALKAFVVRIGDFGFALGIL
... AVFYLFSSVAF--ETIFTAAPAQAGTT---
... FEFLGLEVHALTLICLLLLIGAMGKSAQLGLHVWLPDAMEGPTPVSALIIHAATMVTAGVFMVVRLSPLFELAPS
... VLAAAIIIGALTAFITATIALVQNDIKRVIAYSTCSQLGYMFFAVGVSAYGAAIFHLMTHAFFKSLFLGSGSV
... IHAMSGERDMRQMGGIWRRIPLTYVAMCVGSLSLI--GIPF-----
... FAGYYSKDIILESAAWEAHGFAGNFAYILGVVVAFLTAFYSYRMLFMTFHGDSR--AGEKVMHV-----
... -----
... HESPKVMTVPLIILSVGAIFSGYLGVDLFDVGD-GGEG---FW--
... RASILALPSHDALADTHYASWYIQITPYIQITLGILLAFITYSKF-----
... -----
... PGLADSAERFPRLHAFLYNKWFDEVYDRLFVRPTLVLARGLWKS-GDGRLIDGIGPDGIA-
... ASVLRVGRRAAALQSGYVYHYAFAMIIGVVGFIISWHLYGSMG-----
61 >MBT5194942_NuoL_Rhodospirillaceae_SI074_bin4_oxycline_NosZ
62 MY-----HAIVFLPLIAFLIVGTG----RVLGDRPSQWITCGAVIISAVLSLVAFWQVAL--GGQP-
... VKVEVA-SWIVSGTFDVSWSLRIDQLTAVMLVVVNGVSALVHVYSVGYMSHDPH-----
... KPRFMAYLSLFTFAMLMLITSDNFLQMFAGVGLASVLLIGFWYHKPAANAAAIKAFVVRIGDFGFGLGIM
... ATFMVFGSVDF--DTVFAASPDQVGKT---
... FHFLSWEVDVMTTICILLFIGAMGKSAQVPLHTWLPDAMEGPTPVSALIIHAATMVTAGVFLVARCSPMFEFSPT
... ALVVVTIVGGTTAFAAATVGLVQNDIKRVIAYSTCSQLGYMFFALGVGAYPVAIFHLFTHAFFKALLFLGSGSV
... IHAMSDEQDMRRMGGIYKYIPQTYIMMWIGSLALA--GLPI-----
... FAGFYSKDAILESFAAHTGAGQYAFWLGLAAAVMTAFYSWRLLFMTFHGQPR--ASQEVMSHV-----
... -----
... HESPWSMLVPLYFLAAGSILSGILFVHYFVGD-GAGA---FW--
... GNSIFMLPDNNILEAMHHVPTWVKVAPIVAGLFGILVAWQFYIRR-----
... -----
... TDIPARLAKVHHEAYLFLLNKWFDELYDLTIVNPAKWLGRLLWKG-GDGRIIDGFGPDGIA-
... ATVMRVARASALQSGYLYHYAFAMLIGVAVLVTLFYTSTGGGH-----
63 >WP_108680428_NuoL_Methyloceanibacter_sp._wino2
64 MY-----HAILFLPLIGALFAGLFG----RFVGYRACEIVTISLMFVAAFLSWIAFYQVAI--QGED-
... VRISLI-GFMHSGAFETYWSIRIDTLTAVMLVVVNTVSSVHLYSVGYMDEDPH-----
... KERFFAYLSLFTFAMLALVTSDDLVLQFFGWEGVGLASVLLIGFWYKKPSANAAAIKAFVVRVGDGFLGIF
... TIFYVFGAVQY--DTIFAAAPDQVGKT---
... ITFLSWEVPALELMCFLLFMGAMGKSAQFLHTWLPDAMEGPTPVSALIIHAATMVTAGVFMVARMSPFLDLAPY
... ALAFVAFIGATSAFAAATAAVVQTDIKRVIAYSTCSQLGYMFAAEGVGAYGAGIFHLFTHACFKALLFLCAGAV
... IHTLADNQDMRRMGGLRKIIPFTWMMMLIGSLALT--AFPL-----
... TSGFVSKDFIIEFTWFDHTAVGQYTYWMVLIAAFLTSLYTWRLMFMTFEGNFR--GPKDVKHA-----
... -----
... HEPPTMGVPLMVLAAGALFAGLGRHLFIGA-DQAS---FW---NRDSIVLPH---
... GGHHVDPFWLVLSPTIAMTLGFLIAWYCYMWR-----
... -----PLVPFGLLKRFPATNQFFHAWYFDALYDRIFVRPAKWLGNFLWKV-
... GDGKIIDGLGPNVA-ARVLDITRGVVKLQTYIHYAFIMLIGVALLITYFIVTGGAKP-----
65 >PJK29752_NuoL_Minwuia_thermotolerans
66 MY-----SLIVFAPLLGAILAGFFG----RMIGDRGSMLVTSGLMTLAAVLSWIVFLDVTF--GHAP-
```

```
66... THVELL-TWITAGEFRVNWALQVDQLTAVMLIVVNTVACLVHWYSIGYMAHDPH-----  
... KARFFSYLSLFTFAMLMLVTSDFVQLYFGWEGVGLASYLLIGFWYHKPSANAAAMKAFIVNRVGDGFGFALGIA  
... GIFLVFEDVTF--AGVFAATPEVAGQT---  
... FQFLGYEVDILTITICLLLFMGAMGKSAQLPLHTWLPDAMEGPTPVSALIIHAATMVTAGVFLVVRCSHMFYEYSPD  
... ALAVVTVVGASTAFFAATIGLVQNDIKRVIAYSTCSQLGYMFFAAGLSAYPVAIFHLFTHAFFKALLFLGAGSV  
... IHAVADEQDMRKMGLLARHIKKTYYIMMWIGSLALAGIGIPG-----  
... FAYVFGFYSKDLIVESAFGAGSGVGQFAYIMGVGAAIMTAFYSWRLLFMTFHGKPR--APRETMAHI-----  
-----  
... HDSPPVMMIPLYILAVGAVFSGLLFIGPLTGH-HWHD---FW--  
... GDSILILPQHGAMEAAHEVPLWVKLSPLVASLVGILIAWVMYVRK-----  
-----  
... TDLPGNFANTHRPLYLFLLNKWFDELYDWIFVRPAKALGRILWKG-GDGRIIDGLGPDGIS--  
... ASVLRATRITMLQTGYVYHYAFAMLIGIAVLVTFYFYAIGV-----  
67 >WP_090071583_NuoL_Cohaesibacter_marisflavi  
68 MY-----SAIVFLPLIGFLIAGLFG----RTLGHKASEIITSTLLVIAAFLSWVAFLSVGI--  
... GHGESQTVNIL-TWSSGDLEINWSIRVDLTLVVMLVVNTISALVHIYSIGYMHGDPH-----  
... RARFFAYLSLFTFAMLSLVTADNLLQMFFGWEGVGLASYLLIGFWYQKPSANAAAMKAFIVNRVGDGFGFLGLC  
... GIYVLFGSISF--DTIFANASAMQEQT---  
... IHFLGQDFNALTITICLLLFMGAMGKSAQFLHTWLPDAMEGPTPVSALIIHAATMVTAGVFMVARLSPLFELSPT  
... ALEVVTFIGATTAFFAATVGLVQNDIKRVIAYSTCSQLGYMFFALGIGAYGAAVFLFTHAFFKALLFLGAGSV  
... IHAVSDEQDMRRMGGLRKHIKLTLYLMLLVGTFALTGVGIPGT-----  
... ILGFAGFNSKDAIIESAFAAQNGMANYAFAMTVIAALFTSFYSWRLLIFLTFHGRER--MSADVKAHI-----  
-----  
... HESPAVMTVPLIVLALGAVLAGMVFAGYFYGH-HYEE---FW--  
... KGALFTGAENHVMHESHDPMMVKLAPFVMMAVGFLVAFGFYILS-----  
-----  
... PSTPKKLAERHNWLYKFLLNKWFDELYNFLFIRGAKGLGSLLWKG-GDEGVIDRFGPNGIA--  
... ARVVALTSRINRLQTGYVYHYAFAMMIGVAILITYSMLS-GGAH-----  
69 >SDF10219_NuoL_Thalassobaculum_litoreum  
70 MY-----AAIVFLPLIGALIAG-FGN---KKLGDRGAQIVTCGAMLTSAVLGIVAFWEVAL--QGNA--  
... QTVELF-TWIDSGSFEASWALRWDLTLAVMVIVVTVVSSCVHVYSVGYMSHDPS-----  
... IPRFMAYLSFFTFAMLMLVTSDFVQLYFGWEGVGLASYLLIGFWYDRPSANAAAIIKAFVNRVGDGFGFALGIF  
... GCFLLFDAVSF--DAIFAAPEMAGTT---  
... FGFLWWEVDALTVAILLFIGAMGKSAQLGLHTWLPDAMEGPTPVSALIIHAATMVTAGVFLVARMSPLEFYAPT  
... ALVVVTVVGAAATAFFAATVGTQNDIKRVIAYSTCSQLGYMFFALGVSAYPAAIFHLMTHAFFKALLFLSAGSV  
... IHALHDEQDMRNMGGIWRKIPWTYAMFWIGSLALA--GIPF-----  
... FAGYYSKDMILESFAAHTGAGQFAFWAGIVAALLTAFYSWRLLFMTFHGKPR--MDQHTFDHA-----  
-----  
... HESPPVMLVPLIVLAIGAVFSGFIGYEYFVGH-EMDA---FW--  
... GSAIKVLEENNVIEAAHHSPTWVKLLPLVVGIVIGIGAAYVAYILN-----  
-----  
... PGIPAKVTSAIRPVYLFLLNKWFDELYDWL FVKRSWQAGLMFWKT-GDGTIINGFGPDGVS--  
... AMTRWCAGQVARLQTGYLYHYAFAMLIGVVALVSWYLAF-GG-----  
71 >WP_090018703_NuoL_Limimonas_halophila  
72 ME-----VVAVFLPLIGAALAGLFG----GVLGDRGSQLVTCGLLIVSAVLSVIVFVDVAL--YDNA--  
... RTTELF-TWFASGDLELSWAIRMDTL SAVMLATVTVISALIHVYSIGYMEHDAS-----  
... IQRFFSYISLFTFFMLMLVTDNLFQLFFGWEGVGLASYLLIGFWYQKPSANAAAIIKAFVNRVGDIGFALGIA  
... ATFFVFQTTSF--DQVFAAPEMADTG---
```

```
72... FSFLGIEAPALTIISILLFIGAMGKSAQLGLHTWLPDAMEGPTPVSALIIHAATMVTAGVFMFLARVSPILEQAPT
... ALAVITIIIGALTAFFAASVGMVQNDLKRVIAYSTCSQLGYMMFAVGVSAIYGAIIFHLMTHAFFKALLFMGAGSV
... LHAMDEEHDMRKMGGIWRMLPITYAVMWIGSLALA--GIPP-----
... FAGFFSKDMILEAAYAHSHTGQLAFWLGVIAGMTAFYSWRLLFMTFHGKPR--ASAETMKHV-----
... -----
... HESPKVMTLPLMALAVGAVLAGWLGYSFAVGH--GFEH----FW--SGSIL----
... GHEAIKAAHVPLWVKLLPLVVSVGGIAYAYVMIAR-----
... -----PELPAALASRLRPVHAFLYNKWYFDELYDLVFRPAWALGNGLWRA--
... GDIIVIDGLGPNQVS--SVARGLARRASQLQTGYVYHYAFAMLIQVVALVTWYMMTQIG-----
73 >WP_027135330_NuoL_Geminicoccus_roseus
74 MY-----TILVFAPLVGALIAGLFG----RLIGDRASQVVTGCFMAISAICAISSFFLNI---YGEP-
... FKVVLVFDWIVVGSFDTQWALRIDGLSATMMLVVSFISFLIHVYVSVGYMSHDAS-----
... IPRFMSYLSLFTFAMLMVTSNDLLQLFFGWEGVGVASYLLIGFWYKPSACAAAMKAFIVNRVGDVDFGLILGLA
... GCYLVFDSIQY--DVIFPQVAEFADSS----
... IVLFSYEFNTLTIIGVLLFIGAMGKSAQLGLHTWLPDAMEGPTPVSALIIHAATMVTAGVFLVARFSPLYEYAPT
... ALAMVTLVGASTAFFAATIGTVQNDIKRVIAYSTCSQLGYMFFACGVSAYSAGVFHLFTHAFFKALLFLSAGSV
... IHAMSDEQDMRKMGGIWRKIPYTYAMMWIGSLALM--GVPF-----
... FAGYYSKDAILEAAYASHAPFAGYAFWLGAAAFLTAFYSGRLLWMTFHGKPR--ADHHTMEHV-----
... -----
... HESPWVMLVPLFCLAAGAVFAGWLAGKALDPD-AA-----WW--
... GGAIIFMAHEPNIMEELHHVPALVKFAPLIVGIAGFGLSWVFYLM-----
... -----
... PGIPGRLASAARPVYLLLNKWFDELYDRIFVVRPSKMIGSALWRG--GDVFVIDGFDPDIA-
... ATTAQLAKQTARLQTYVYHYAFAMLIQVVALVTWYLLFFVS-----
75 >WP_088559410_NuoL_Arboricoccus_pini
76 MLH-----TILVLCALGALIVGLFG----RYLGDRAQIITCGLMAITALCAWIGVFTYM---GEP-
... FKVHWF--TWISVGGLEADWSLRIDSLSTIMMLVVGFIISFLIHVYVSVGYMSHDPS-----
... KPRFMAYLSLFTFAMLMVTSNDIIQLFFGWEGVGVASYLLIGFWYTRPSACAAAMKAFIVNRVGDVDFALMLGIG
... ALFLVFDVSVSY--DVIFNKAASLADTQ---
... IVLFGGTFQTLNIITLLLFIGAMGKSAQIGLHTWLPDAMEGPTPVSALIIHAATMVTAGVFLVARFSPVFEFAPS
... TLAFTVFIGATTCIFAATVGMTQFDIKRVIAYSTCSQLGYMFFACGVGAYQAGVFHLMTHAFFKALLFLGAGSV
... IHAMSDEQDMRKMGGIWKIPLTYAMMWIGTLALIGFGIPGIG-----
... GFAGFYKDAILEAAYASNGSFHLYAFWMGVLA AVLTA FYSGRLIFLSFHGEPR--ADHHTMEHV-----
... -----
... HESPPIMTVPLMVLGVGAVIAGFVAFGMVEPE--GN-----WW--
... GGAIFTGPHVHLHAMHEVPLWVSLAPFFAMAFGLGLSWVFYIAM-----
... -----
... PGTAPKIAAAVRPLDNFLRNKWFDELYDRIFVVRPALALGRGLWHG--GDQGIIDRFDPDIA-
... GTTWGTALRIARLQTYVYHYAFVMLIGVAVFVSWYLLFLQR-----
77 >TVQ34661_NuoL_Geminicoccaceae_bacterium
78 MY-----TAIVFLPLLGAIVAGLFG----RIIGDRAAQIVTCSLLCISALLSGIALLTVPF---GEP---
... FKVPLA--TWIVSGSFEVDWALRIDALTVVMLVVVTWVSALVHIYSIGYMSHDAS-----
... IARFMSYLSLFTFAMLMVTDNFLQLFFGWEGVGVASYLLIGFWYKASANNAAMKAFIVNRVGDVDFALILGIA
... AIFLVFDSVDF--DTVFAAAPAFAEHQ---
... IALFGVTWSTLDLICILLFIGAMGKSAQLGLHTWLPDAMEGPTPVSALIIHAATMVTAGVFLIARVSPIIIEYAPV
... ALAVIVLIGATTAFFAATVALTQNDIKRVIAYSTCSQLGYMFFALGVGAYAAAIFHLFTHAFFKALLFLAAGSV
... IHGMSNEQDMRRMGGIWRHMKFTYAMMWIGSLALV--GVPF-----FAGFYKDLILEAFAA-
... GGVGFYAFALGIAAAVMTAFYSGRLLFMTFHGKPR--ASEEVMHHV-----
```

```
78... -----HESPLVMTIPLGLLAVGAVFAGYLG LPMVADD-HA-----  
... FW--GGSIYLEMERNIIYLAHYVPTWVVIAPIVAGFVGLGLAYVIYIQR-----  
... -----  
... TELADRLAERFRPLYQFSLNKWYFDELYDALFVRPARQAGTFLWRR--VDAGIIDDYGPNGVA--  
... ATALEGTRVVKLQTGYIYHYAFVMLIGVAALVSWFLFVARG-----  
79 >WP_138380149_NuoL_Luteithermobacter_gelatinilyticus  
80 MY-----QAI VFLPLLGAIIAGFFG----KQIGDRGAQIVTCSFLVISALLSWIAFGQVAL--GHQE--  
... AYVTVL-NWISSGDLQLDWA FRIDTLTAVMLVVVTTVSALVHIYSVG YMSHDPH-----  
... IPRFMSYLSLFTFAMLM LVTADNFLQLFFGWEGVGLASYLLIGFWYKKPSANAAAIKAFV VNRVGD FGFALGIV  
... AIFMAFGSLDF--TTVFSSVPDYTDNV---  
... IYFLGMELDLITTISILLFIGAMGKSAQLGLHTWLPDAMEGPTPVSAL IHAATMVTAGVFMVARCSP IFEYSPD  
... ALAFVTFIGASTAIFAATIGVAQNDIKRVIAYSTCSQLGYMFFALGVSAYGAAIFHLFTHAFFKALLFLGSGSV  
... IHAMSDEQDMRKMGLWKKIPITFAMMTIGTLALT--GFPF-----  
... FAGYYSKDMIIESAFASSASMSDYAFAMGVLAALFTSFYSWRLVFMTFFGESR--ASKKVQDHV-----  
... -----  
... HESPQVMLIPLYLLAVGAIASGFVFSEYFTGH-HYED---FW--GTSLKV--  
... LGDNVMEAAHHVPAWVWSPFIAMVTGFAVAFYSYILA-----  
... -----PETPAAAARTFKYLYNLFLNKWYVDEIYDFLFVRPAKRLGAF LWKK--  
... GDLGTIDRYGPDGVS-ATVVALARKFREMQTGYLYHYAFAMLIGVAAFTTWFIV--GGN-----  
81 >WP_139938140_NuoL_Emcibacter_nanhaiensis  
82 MY-----QTIVFLPLVMSFIAGMFG----NRIGDRGAQIITCGGLIVSAILSWVAFFDIAL--GHNV--  
... AHVEVL-SWIVSGDFNLSWAFKVDLTSVMLVVVTTVSCV VHIYSVG YMSHDPD-----  
... IPRFVSYLSLFTFAMLM LVTADNFLQMF GWEGVGLASYLLIGFWYKKPSACAAA IKA FV VNRVGD FGFALGIF  
... AIFMTFGTLDF--ATVFASVPDVAGQK---  
... IHFLNWELDLITTICILLFIGAMGKSAQLGLHTWLPDAMEGPTPVSAL IHAATMVTAGVFMVARCSP IFEYSPD  
... ALAVVCVIGASTAIFAATIGVAQNDIKRVIAYSTCSQLGYMFFAIGVSAYGAAIFHLFTHAFFKALLFLGSGSV  
... IHAMSDEQDMRKMGLWKKIPVTFGLMTIGTLALT--GFPF-----  
... FAGYYSKDMIIESAFASHSPVGPYAFAMGVVAALFTSFYSWRLVFMTFFGESR--ASKKVQDHV-----  
... -----  
... HESPQVMLVPLYILAVGAVFAGWVFHEYFTGH-HYEE---FW--GHALKL--  
... VGDNMHEAAHHVPGWVWSPFVAMVTGFAVAWISYIYA-----  
... -----PWIPGAAASTFKYLYNLFLNKWYVDEIYDFLFVRPAKRLGVFLWKR--  
... GDEQTIDRYGPDGVS-ASVAALARKFKEMQTGYLYHYAFVMLIGVAAITTWFIV--GGN-----  
83 >WP_099472212_NuoL_Paremcibacter_congregatus  
84 MY-----QIIIVFGPLLAIIAGLFG----RKLGDKGAQAITCGALILSAILSWVAFFQIGL--GHTV--  
... EHVTVM-NWVTSGDLSFNWAFKVDLTA VMLVVVNTVSCLVHIYSVG YMSHDPH-----  
... KPRFMAYLSLFTFAMLM LVTADNFVQMFFGWEGVGLASYLLIGFWYKKPSACAAA IKA FLVNRVGD FGFALGIL  
... LVFMATGSVDF--ETVFAKIPELQGQQ---  
... IHFLWMELDLITTM CILLFIGAMGKSAQLGLHTWLPDAMEGPTPVSAL IHAATMVTAGVFMVARCSP IFEFSPD  
... ALAFVTLVGASTAIFAATIGTTQNDIKRVIAYSTCSQLGYMFFALGVSAYGAAIFHLFTHAFFKALLFLGSGSV  
... IHAMSDEQDMRKMGLWKNKIPITFAMMTIGTLALT--GFPF-----  
... LAGFYSKDMIIESAFAANNPWSDYAFFMGVFAALLTSFYSWRLVFMTFFGKSR--ASQSVQDHV-----  
... -----  
... HESTNWMLVPLYVLAAGALAAGFVFKENFVGH-HYED---FW--  
... GOALFLDAAANVMEAAHHVPGWVVAAPFVVMVLGFLGAIYAYIWK-----  
... -----  
... PETPAAFAGSFRYLYNLFYNKWIYDEIYDFLFVEPAKKIGVFLWKK--GDENVIDRF GPDGAA--  
... ASVMTLARRFKALQSGYVYHYAFAMLMGVA AFVTWFI---GGAS-----
```

```
85 >WP_085883634_NuoL_Oceanibacterium_hippocampi
86 MY-----VLIVFLPLAAALIAGFFG----RQLGDRGAQVVTSGAVLTSALLSWVALFQVAF--GHAP-
... VTITLF-DWVVSDFAAASWAIKRDALAVMLVVVNTVSSLVHVYSIGYMSHDKA-----
... KGRFMAYLSLFTFAMLMMLVTADNLLQLYFGWEGVGLASYLLIGFWYHKASANAAAIAKAFVVRVGDGFGFALGVV
... GIFYIFGSIEF--DQIFAAAPEQVGKS---
... FVFMGMEVDVLTTLCLLLFLGAMGKSAQLFLHTWLPDAMEGPTPVSALHAATMVTAGVFMVARLSPLFEYAPD
... ALTVVTVVGGSTAFFAATVGLVQNDIKRVIAYSTCSQLGYMFFAAGVSAYPVAIFHLFTHAFFKALLFLCAGSV
... IHAVSDEQDMRRMGGLWKHIKATYVLMWIGSLALA--GIWP-----
... FAGYFSKDMVLEAAYAAGTTVGSYAFWLGIAAAIMTAFYSWRLLFMTFHGAPR--ASKEVMDHV-----
-----
... HESPKVMLIPLYVLALGSICAGFIFAPYMVGH-HYQE---FW--
... GNSILVLEEHVAMAEAHDAVAVKFLPLVAGVVGILIAFQLYIRR-----
-----
... PEMPAELARTHQALYQFLLNKWYFDELYDWIFVRPATWLGRVLWKG-GDGRIIDGLGPDGIA-
... MTVVRVAARAKQIQTYIYHYAFAILIGIAAFVTLFFY--GVD-----
87 >MBT5765548_NuoL_Kordiimonadaceae_SI072_bin64
88 MY-----QTIVFLPLLASIIAGLFG----NRIGVRGAQGVTCGALIVSAVLSWVAFFQVAMAPGDHA-
... THVQVL-SWIVSGDFNVNNAFQIDTLAVMLVVVNTVSVCLVHIYSVGYMSHDPH-----
... IQRFMSYLSLFTFAMLMMLITSDNFVQMFFGWEGVGLASYLLIGFWYKKPSACAAAIAKAFVVRVGDGFGFALGIF
... AIFMTFGSADF--AVVFASVGDHVDKT---
... IHFLGMELDLLTTICLLLFIGAMGKSAQLGLHTWLPDAMEGPTPVSALHAATMVTAGVFMVARCSPLFEYSPD
... ALAVVAVIGASTAFFAATVGMSSQFDIKRVIAYSTCSQLGYMFFALGVSAYGAAVHFLFTHAFFKALLFLGSGSV
... IHASSDEQDMRNMGGLRQIPVTFWMMTIGTLALT--GFPF-----
... LAGYYSKDMIIESAFAAHSGVGTAFGLGVAAALMTSFYSWRLVFMTFFGESR--ASKEVQDHV-----
-----
... HESPQVMLIPLYVLALGALLSGFVFKEYFVGH-NYEE---FW--AGALFL-
... IGDNVMEAAHHVPTWVIASPFIAMVVGAFATAWYFYVKE-----
... -----PSMPGKFTSTFRFAHALSFNKWYFDELYDII FVKPAMKLGMI FWKR-
... GDENIIDRYGPDGVS-AAVVRVAQKFKQFQTGYLYHYAFVMLIGLSALVTFFV--MGGL-----
89 >MBT6031505_NuoL_Kordiimonadaceae_SI072_bin126
90 MY-----QTIVFLPLLASLIAGLFG----NRIGDRGAQIVTCGAMIVSAVLSWVAFYQVALTPGDNS-
... LHVQVL-SWIVSGDFNVNNAFQIDSLAVMLVVVNTVSVCLVHIYSVGYMSHDPH-----
... IPRFMSYLSLFTFAMLMMLITSDNFVQMFFGWEGVGLASYLLIGFWYKKPSACAAAIAKAFVVRVGDGFGFALGIF
... AIFMTFGSADF--AVVFADVGSYTDKS---
... IHFLGMELDLLTTICILLFIGAMGKSAQLGLHTWLPDAMEGPTPVSALHAATMVTAGVFMVARCSPLFEYAPA
... ALEVVCIVGASTAFFAATVGMSSQFDIKRVIAYSTCSQLGYMFFALGVGAYGAAIFHLFTHAFFKALLFLGSGSV
... IHASSDEQDMRNMGGLRKKIPLTFWMMTIGTLALT--GFPF-----
... LAGYYSKDMIIESAFAAHSSVGSYAFAMGVAAALMTSFYSWRLVFMTFFGESR--ASKEVQDHV-----
-----
... HESPQVMLVPLYVLAFGALFSGFIFHEYFVGA-HYED---FW--AGALFL-
... VGDNVMEAAHHVPMWVVEAPFVAMTVGLATAYFYIRR-----
... -----PEMPGKFVETFRFLHAISFNKWYFDELYDILFVRPAMKLG YILWKR-
... GDENIIDRYGPDGVS-AAVVRVAEKFRSLQTGYLYHYAFAMLIIGLSAFVTWFV--MGGQ-----
91 >MBT3790209_NuoL_Alphaproteobacteria_SI054_bin61
92 MY-----TALVFLPLLGAVALAGLFG----RILGDRGSQAVTLIGITTSALLSVYVFFDVT---
... GNNNPVVVDLF-TWIESDSFEVSWALRVDQLAVMLMVVAVVHWSVGYMSHDKA-----
... IPRFMSYLSLFTFAMLMMLVTADNFLQMFVGGWEGVGLCSYLLIGFWYDRPSANAAAIAKFLVNRVGDGFGFALGIM
... AIFFTFNSVEF--DVFFAAPEMAGKT---
```

```
92... FMFLGQEW DILTTITMLL FVGAMGKSAQLGLHTWLPDAMEGPTPVSAL IHAATMVTAGVFMLARCSYLF EYAPF
... TLEVVTVIGATTAFVAATIGLVQNDIKRVIAYSTMSQLGYMFFAIGVSAYPAAIFHLLTHAFFKALLFLGAGSV
... IHAMSDEQDMRNMGGIYKLI PGTYLMMWIGSLALA--GVPL-----FAGYYSKDMIIEVAFAG-
... SGVGYAFTMGILAALMTAFYSWRLLFMTFHGPAR--ADEKVMAHV-----
... -----HESPKVMMLPLLVLALG AIFAGWFWAGDMIGD-GRVA----
... FW--GGESIFIQ PANHIFENAHHVS AWVKYSPTALGAIGILLAWWFYIKN-----
... -----
... PNIPKAIATMHRE AHLFLLNKWYFDELYDLIFV NPAKRLGHFLWKF-GDGKIIDGLGPDGIS-
... RLVLNITRRAQTLQSGYVYHYAFAMMLGVAGFVSWFV FGLGG-----
93 >MBT4017013_NuoL_Alphaproteobacteria_SI053_bin31
94 MY-----TALVFLPLLGA VIAGLFG----RVLGDRGSQAVTLIGITTSALLSLYVFFDVT----
... GNNNPVVIELF-TWME SDSFEVSWALRIDQLTAVMLMVTVV SAVVHWYSVGYMSHDKA-----
... IPRFMAYLSLFTFAM LMLVTADNFMQMFFGWEGVGLCSYLLIGFWYDRPSANAAA IKAFLVNRVGD FGFALGIM
... AIFFTFNSVEF--D VVFAAAPDVAGKT----
... FVFLGQEW DILTTITMLL FVGAMGKSAQLGLHTWLPDAMEGPTPVSAL IHAATMVTAGVFMLARCSPIFEFAPF
... TLEVVTIIGATTAFVAATIGLVQNDIKRVIAYSTMSQLGYMFFAIGVSAYPAAIFHLMTHAFFKALLFLGAGSV
... IHAMSDEQDMRKMGGIYKLI PGTYLMMWIGSLALA--GVPL-----
... FAGYYSKDMIIEVAFAS NSGVGMYAFTMGILAALMTAFYSWRLLFMTFHGPAR--ADEKVMAHV-----
... -----
... HESPKVMMLPLLVLAFG AIFAGWFWFDDMVGD-GRAA----FW--
... GQSIFIQ PANQIFENAHHVS AWVKYSPTALGAFGILLAWWFYIKN-----
... -----
... PGIPKTIATAHRE VHSFLLNKWYFDELYDLIFVRPAKRIGYFLWKI-GDGKIIDGF GPDGIS-
... RLVLNITRRAQALQTGYVYHYAFAMMLGVAGFVSWFV FGLGG-----
95 >MBT7747133_NuoL_Alphaproteobacteria_SI037_bin135
96 MY-----TALVFLPLLGA VLAGLFG----RILGDRGSQAVTLIGITTSALLSVYVFFDVT----
... GNNNPVVVDLF-TWIE SDSFEVSWALRVDQLTAVMLMVVCVVS AVVHWYSVGYMSHDKA-----
... IPRFMSYLSLFTFAM LMLVTADNFLQMFFGWEGVGLCSYLLIGFWYDRPSANAAA IKAFLVNRVGD FGFALGIM
... AIFFTFNSVEF--D VVFAAAPEMAGKT----
... FMFLGQEW DILTTITMLL FVGAMGKSAQLGLHTWLPDAMEGPTPVSAL IHAATMVTAGVFMLARCSYLF EYAPF
... TLEVVTVIGATTAFVAATIGLVQNDIKRVIAYSTMSQLGYMFFAIGVSAYPAAIFHLLTHAFFKALLFLGAGSV
... IHAMSDEQDMRNMGGIYKLI PGTYLMMWIGSLALA--GVPL-----
... FAGYYSKDMIIEVAFAS GSGVGYAFTMGILAALMTAFYSWRLLFMTFHGPAR--ADEKVMAHV-----
... -----
... HESPKVMMLPLLVLALG AIFAGWFWAGDMIGD-GRVA----FW--
... GESIFIQ PANHIFENAHHVS AWVKYSPTALGAIGILLAWWFYIKN-----
... -----
... PNIPKAIATMHRE AHLFLLNKWYFDELYDLIFV NPAKRLGHFLWKF-GDGKIIDGLGPDGIS-
... RLVLNITRRAQTLQSGYVYHYAFAMMLGVAGFVSWFV FGLGG-----
97 >MBT5047508_NuoL_Rhodospirillaceae_SI074_bin93_MPN001
98 MLY-----VLCIFLPLI GAATAGLLG----PWIKARGAMIVTCGALLISALISPFILIEVGL--EGKT-
... TTIQIF-NWISSGAF EVDWALRFDLTA VMLVVTVVSCAVHFYSIGYMSH DPS-----
... IPRFFSYLSLFTFFM LMLVTADNFLQLFFGWEGVGLAS YLLIGFWYEKPSANAAA IKAFLVNRVGD FGFALGIM
... GVFLLYGTVSF--D AVFDATPGKAAAT----
... IEFLGGQYHALTVI CLLL FVGAMGKSAQLGLHTWLPDAMEGPTPVSAL IHAATMVTAGVFMVARLSPMFEYSPS
... ALAVTVVGASTAIFAATV GVCQNDIKRVIAYSTCSQLGYMFFACGVSAYAAGIFHLFTHAFFKALLFLGAGSV
... IHAMSDEQDMRKMGGIWRMIPV TYAVMWIGSLALA--GIPP-----
... FAGFYSKDIVLEAAYAS NTGIGEYAFWMGIAAAFLTAFYSWRLL LMTFHGEAR--ADERVMAHV-----
```

```
98... -----  
... HESPKVMLIPLILLAVGAIFAGYIGVSYFVGE--GAVE----FW--  
... GNAILVLPSPHALEAAHHVPFWVKALPLVVGVSIGIALAYILYVLA-----  
... -----  
... PGLPAAIAGRFRFIHQFLLNKWYFDELYDFLFVRPAFILGRGFWKS--GDGALIDGIGPDGIA--  
... AATLNLARRAAALQSGYLYHYAFAMLTGVVVLVTWYLFHQVG-----  
99 >MBT4689853_NuoL_Rhodospirillaceae_SI039_bin92  
100 MY-----HAIVFLPLIAFLIVGPFQ----RVLGDKPSQWITCGAVITSAVLSIVAFWQIAL--  
... GGGDTVKEIA--SWIVSGTFDVSALRIDALTAVMLVVVNGVSALVHVYVSGYMSHDPH-----  
... KPRFMAYLSLFTFAMLMLITSDNFLQMFQWEGVGLASYLLIGFWYHKPSANAAAIIKAFLVNRVGDGFGFLGIM  
... AIFMVFGSLDF--DTVFAAVPGQVGNT---  
... FHFLNWEFDIITTCICILLFIGAMGKSAQVPLHTWLPDAMEGPTPVSALIIHAATMVTAGVFLVARCSPMFEFSPT  
... ALVVVTIVGGFTAFAAATVGLVQNDIKRVIAYSTCSQLGYMFFALGVGAYPVAIFHLFTHAFFKALLFLGSGSV  
... IHAMSDEQDMRRMGGIFKYVPQTAIMMWIGSLALA--GLPI-----  
... FAGFYSKDAILESFAAHTGAGMFAFYAGMAAAVMTAFYSWRLLFMTFNGDPR--ASQEVMSHV-----  
... -----  
... HESPPSMLIPLYFLAAGSILSGMLFVHYFVGD--GHQA---FW--  
... GDAIFMGPENHILEAMHHVPTWVKIGPIAAGIIGIFVAWLFYIKR-----  
... -----  
... KDIPVNLAKVHHEVYLFLLNKWYFDELYDLIFVRPAKWLGRIWLRG--GDGRIIDGYGPDGIA--  
... AMVMHLARRASALQSGYLYHYAFAMLIGVAVLVTWYY--TTGGGH-----  
101 >MBV40747_NuoL_Rhodospirillaceae_NP113_oxycline  
102 MY-----HAIVFLPLLAFLIVGTFG----RVFGDKPSQWITCGAVIASAILSLVAFWQVAL--GGNP--  
... VKVEIA--SWIVSGTLDVSWALRIDALTAVMLVVVNGVSALVHVYSIGYMSHDPH-----  
... KPRFMAYLSLFTFAMLMLITSDNFLQMFQWEGVGLASYLLIGFWYHKPSANAAAIIKAFLVNRVGDGFGFLGIM  
... ATFMVFGSIDF--NTVFAAAPDQVGKT---  
... FHFLSWEVDVMTTCICILLFIGAMGKSAQVPLHTWLPDAMEGPTPVSALIIHAATMVTAGVFLVARCSPMFEFSPT  
... ALVVVTIVGGSTAFAAATVGLVQNDIKRVIAYSTCSQLGYMFFALGVGAYPVAIFHLFTHAFFKALLFLGSGSV  
... IHAMSEEQDMRRMGGIFKYVPQTAILMWVIGSLALA--GLPI-----  
... FAGFYSKDAILESFAAHTGAGDYAFYLGAAAVMTAFYSWRLLFMTFHGIPR--ASQAVMSHV-----  
... -----  
... HESPLVMLPLYFLAAGSILSGILFVHYFVGD--GHQA---FW--  
... RGQAI FMAEGNDILES FHHVPIWVKVAPIAAGVFGIFVAWLFYIRN-----  
... -----  
... QDLPAKLAKLHYPLYLFLLNKWYFDELYDLILVNPAAKWLGRIWLRG--GDGKIIDGFGPDGIA--  
... ATVMNLARRASALQSGYLYHYAFAMLIGAVLVTWYYTSTGGGH-----  
103 >MBT3373516_NuoL_Rhodospirillaceae_co234_bin8  
104 MY-----HAIVFLPLLAFLIVGTFG----RVLGDRPSQWITCGAVITSAILSLVAFWQVAL--GGQP--  
... VKVEIA--SWIVSGTFDVSALRIDALTAVMLVVVNGVSALVHVYVSGYMSHDPH-----  
... KPRFMAYLSLFTFAMLMLITSDNFLQMFQWEGVGLASYLLIGFWYHKPSANAAAIIKAFLVNRVGDGFGFLGIM  
... ATFMVFGSLDF--DTVFAASPDQVGKT---  
... FLFLSWEVDVMTTCICILLFIGAMGKSAQVPLHTWLPDAMEGPTPVSALIIHAATMVTAGVFLVARCSPMFEFSPT  
... ALVVVTIVGGTTAFAAATVGLVQTDIKRVIAYSTCSQLGYMFFALGVGAYPVAIFHLFTHAFFKALLFLGSGSV  
... IHAMSDEQDMRRMGGIFKYVPQTAILMWIGSLALA--GLPI-----  
... FAGFYSKDAILESFAAHTGAGDYAFYLGAAAVMTAFYSWRLLFMTFNGTPR--ASQEVMSHV-----  
... -----  
... HESPLVMLIPLYFLAAGSILSGILFVHYFVGD--GAEA---FW--  
... GQAI FMAEGNNILEAMHHVPMWVKIPIAAGVIGILLAWQFYIRR-----
```



```
104... -----  
... TDIPVKLAKMHHELYLFLLNKWFDELYDLIFVNPAKWLGRVLWKG-GDGRIIDGFGPDGIA-  
... ATVMRVARRASALQSGYLYHYAFAMLIGVAVLVSWYYLSSGGGH-----  
105 >MBL6951394_NuoL_Alphaproteobacteria_BS150m-G9_BlackSea  
106 MY-----HAIVFLPLLAFLIVGSLG----RVLGDRPSQWITCGAVIISALLSLLAFWQVAL--GGQA-  
... VRVDIG-SWIVSGTFDVSALRIDQLTAVMLVVVNGVSALVHVYVSGYMSHDPH-----  
... KPRFMAYLSLFTFAMLMLVTADNFLQLFFGWEGVGLASYLLIGFWYHRPTANAAAIIKAFLVNRVGDFFGLALGIM  
... AIFTVFGLSDF--DTVFAATPGQVGKS---  
... FNFLSWEVDVMTTICILLFIGAMGKSAQVPLHTWLPDAMEGPTPVSALIIHAATMVTAGVFLVARCSPMFEFSPT  
... ALVVVTIVGGTTAFFAATVGLVQNDIKRVIAYSTCSQLGYMFFALGVGAYPMAIFHLFTHAFFKALLFLGSGSV  
... IHAMSDEQDMRRMGGIYKYVPQTTGLMWVGLSLALA--GFWP-----  
... LAGYYSKDAILESFAVHTGAGEYAFWLGMAAAVMTAFYSWRLLFMTFAGEPR--ASQEVMRHV-----  
... -----  
... HESPLSMLIPLYFLAAGSILSGVLFVHYFVGE-GHVE---FW--  
... GQAI FMAPGNDVMEAVHHVPTWVKVAPLVAGIVGILVAWQFYIRR-----  
... -----  
... RDIPAGLAKINHEVEYFLLNKWFDEL FELIFVRPAKWLGRLLWKT-GDGRIIDGFGPDGIA-  
... ASVLNLARRASALQSGYLYHYAFAMLIGVAALVSWYYISSGGGH-----  
107 >MDP6874949_NuoL_Alphaproteobacteria_Arabian9_MAG_8_ODZ  
108 MY-----HAIVFLPLLAFLIVGALG----RILGDKPSQWITCGAVITSAILSLVSVFWQVAL--GGQP-  
... VKVEIA-SWIVSGTFDVSALRIDALTAVMLVVVNGVSALVHVYVSGYMSHDPH-----  
... KPRFMAYLSLFTFAMLMLITSDNFLQMF FGWEGVGLASYLLIGFWYHKPSANAAAIIKAFLVNRIGDFGFLCIM  
... ATFMVFGSVDF--DTVFAAAPDQVGKT---  
... LHFLNWEVDVMTTICILLFIGAMGKSAQVPLHTWLPDAMEGPTPVSALIIHAATMVTAGVFLVARCSPMFEYSPV  
... ALT VVTIVGASTAFFAATVGLVQNDIKRVIAYSTCSQLGYMFFALGVGAYPVAIFHLFTHAFFKALLFLGSGSV  
... IHAMSDEQDMRRMGGIFKYVPQTAIMMWIGSLALA--GLPI-----  
... FAGFYSKDAILESFAAHTGAGDYAFYLGAAAVMTAFYSWRLLFMTFNTPR--ASQEVMSHV-----  
... -----  
... HESPPSMLIPLYFLAAGSILSGILFSHYFIGE-GHEA---FW--  
... GQGI FMLPDNDILEALHHVPMWVKIAPIAAGIIGILVAWQFYIRR-----  
... -----  
... TDLPAKLAKVHHEAYLFLLNKWFDELYDLIFVNPAKWLGRLLWKG-GDGRIIDGFGPDGIA-  
... ATVMRVARRASALQSGYLYHYAFAMLIGVGLVLTWFYTSSGGGH-----  
109 >MBM3510012_NuoL_Alphaproteobacteria_K_Offshore_80m_m2_115  
110 MFY-----AAIVFLPLVGAIAAGLFG----RLLGVRASQLVTCLALTL SGVLATWGLYETAV-IGPKD-  
... QQIVLF-TWIVSGDFDVSWTLRIDTLTAVMLFTVSVISSIIHWYSIGYMAHDPH-----  
... IPRFFAYLSLFTFAMLVLTADNFLQLYFGWEGVGLCSYFLIGFWYDRPSANAAAIIKAFVNRVGDFFGFALGIM  
... AMFFTFNSVNF--DTVFAAGAPAVAGKT---  
... FEFLGAEYDILTVTLLLFIGAMGKSAQVPLHTWLPDAMEGPTPVSALIIHAATMVTAGVFLVARCSPLFEYAPT  
... TLAIVTVIGAFTAFFAATVGLVQNDIKRVIAYSTCSQLGYMFFACGVGAYAVAI FHLFTHAFFKALLFLGSGSV  
... IHGFSDEQDMRRMGGVWRKMPVTYAVMWVGLSLALA--GIPF-----  
... FAGYYSKDLIIESFAASTEVGYLAFYLGVAALLTAFYSWRLLFMTFHGPTR--ANPEVYEHV-----  
... -----  
... HESPKIMTVPLLALAVGALFAGVAGYDAFVGD-GRAA---FW--  
... REAIFLLPGHDVIEAAHHVPLWVKLLPIAIIASAGIALAWQFYIRR-----  
... -----  
... TELPGALAKTHADLYQFLLNKWFDELYDAIFVRPAKFLGRALWHG-GDGRIIDGFGPNGIA-  
... QVVIQLARRASLLQTGYLYHYAFAMLIGVAALVTFTRTGGGAP-----
```

```
111 >MBM3570281_NuoL_Alphaproteobacteria_M_DeepCast_65m_m2_129
112 MLY-----GLIVFLPLIAAIVAGFGG----RALGDRGAQVVTCGALIVSALLSGVAFYQVAW--KGQP-
... VTVELL-TWIDSGAFDVMWSLRIDQLTAVMLVVVTWVS AVVHVY SVGYMAHDPH-----
... IPRFMAYLSLFTFAMLMLVTSDFVQLYFGWEGVGLASYLLIGFWYHKPSANAAAIAKAFV VNRIGDFGFG LGIC
... GVFLVFGTVEF--DPVFQTAPGFAGKT---
... FEFLGMKLDMLTVICLLL FMGAMGKSAQVPLHTWLPDAMEGPTPVSAL IHAATMVTAGVFLVARCSPLFEYAPD
... ALAVVACIGAFTAFFAATVGLCQNDIKRVIAYSTCSQLGYMFFAAGLSAYAAAIFHLFTHAFFKALLFLGSGSV
... IHGMSGEQDMRRMGLLAPLKITYVLMWIGSLALA--GVPL-----
... FAGYYSKDAIVETA FMAGGKLG SFAFVMGVAAAFMTAFYSWRLLFMTFHGQNR--HPDRVIEHAH-----
-----
... HESPAVMLVPLYVLAAGSIFAGALFAQAFIGE-GSPI---FG--ASILVL-
... PGHDALAQAHHAPLWVKLAPVAVGLAGIALAWW MYVRR-----
-----
... PDLPGKLAAMHGDAHRFLLNKWYFDELYDALFVRPAKWLGHALWKR-
... GDGKVIDGLGPDGIA-ALTLDI AKRATRLQTGYVYHYAFAMLIGVALLVSWYLY-RGGM-----
113 >OUR77105_NuoL_Alphaproteobacteria_46_93_T64_Sneathiellales
114 MY-----VLIVFLPLLAALIAGLFG----RQLGDRGSQIVTSGAVSASAILSWVALFQVAF--GSAP-
... TTIELF-TWINS GTFDVSWSLRVDSL TAVMLVVNTVSALVHIYSIGYMSHDPH-----
... KPRFMSYLSLFTFAMLMLVTSDFLQMYFGWEGVGLASYLLIGFWFNKPSANAASIAKAFV VNRVGD FGFALGIM
... AIYLVFDSISF--DTVFAAVPEKVGET---
... FNFLGYEVDVITTIALLLFLGAMGKSAQLGLHTWLPDAMEGPTPVSAL IHAATMVTAGVFMVARCSPIFEFSPT
... ALAVVTVVGASTAFFAATVGLVQNDIKRVIAYSTCSQLGYMFFAIGVGAYPVAIFHLFTHAFFKALLFLGSGAV
... IHAVSDEQDMRKMGG LGKH IKITYAMMFIGTVALT--GVPF-----
... FAGFYSKDAIIESAFMAGTDVGN YAFWCGIGAALMTAFYSWRLLFMTFHGKPR--ASKEVMSHV-----
-----
... HESPNVMLIPLYVLAAGAIGAGFV FYEPMVGH-GYKE---FW--
... GNAILLRESNTIMTDFHNIPSWVFWAPMIAMIAGFLLA FNMYIRR-----
-----
... TDIPVQLAKTHSALYQFLLNKWYFDELYDVV FVRPARWIGSKLWTI-GDGKIIDGLGPDGIA-
... ARVLDLAKRASMLQSGYLYHYAFAMMIGVAAFVSFFFL-AGGGH-----
115 >WP_144258814_NuoL_Ferrovibrio_terrae
116 MY-----HLIVFLPLLA AIIAGLFG----RRIGDVASMAVTCVAVIISAVLSWVAFYLVIS--KGMV-
... VTVKVL-DWIDSGTFSVDWALKIDQLTAVMLVVNTVS AVVHVY SVGYMSHDPH-----
... RSRFFSYLSLFTFAMLMLITADNFVQLYMGWEGVGLASYLLIGFWFHKPSANAASIAKAFV VNRVGD FGFALGIM
... ALFFATGSVTF--EAVFAAAPDLAGKT---
... FHFLWKDWDILT VATFLLFLGAMGKSAQLGLHTWLPDAMEGPTPVSAL IHAATMVTAGVFMVARCSPLFEYAPD
... TLAFTVIGASTAFFAATVGLAQNDIKRVIAYSTCSQLGYMFFALGVSAYPAAIFHLFTHAFFKALLFLGAGSV
... IHAVDGEQDMRRMGGLWKHIKITYAMMWIGSLALA--GFPI-----FAGYYSKDMILEVAYAA-
... GGVGQYAYIMGMAAAILTAFYSWRLLFMTFHGKPR--ADHHVMEHV-----
... -----HESPMVMLIPLFVLATGAVLAGIVFYDGFVGH-HWKE---
... FW--GSSILILENHKAMDEAHHVPFLVKVGPIIVGVIGIFIAWIAYIRD-----
-----
... TSLPGRTAAQHMLYSFLLNKWYFDELYDRV FVRPTFWLGNLLWKG-GDGKIIDGLGPDGLA-
... ATVVRLARRASILQSGYVYHYAFAMLIGVAVLVTYFFS AMGH-----
117 >WP_206376079_NuoL_SneathIELLA_chungangensis
118 MMY-----VLIVFLPLLA AALIAGLFG----RSLGDRGSQLITCGAVIISAILSWVALYQIAF--QQT-
... EAVELL-TWINS GDFDVNWALRIDSL TAVMLVVNTVS AVVHVY SIGYMSHDPH-----
... KPRFMAYLSLFTFAMLMLVTSDFVQLYFGWEGVGLASYLLIGFWYKKPAANAAAIAKAFV VNRVGD FGFALGIM
... GIYFVFN SVS F--DEVFAAAPSQAGQT---
```

```
118... FEFLGYQVDILTTLCLLLFVGAMGKSAQIGLHTWLPDAMEGPTPVSALIIHAATMVTAGVFMVARCSPIFEYSPE
... ALMVVTVVGATTCFFAATIGLVQNDIKRVIAYSTCSQLGYMFFALGIGAYPAAIFHLFTHAFFKALLFLSAGSV
... IHAVSDEQDMRKMGGGLWKHIKVTYAMMWIGSLALA--GIPL-----
... FAGYYSKDLIIESAFAAHTGVGDYAFWAGVAAALLTAFYSGRLIFMTFHGEPR--ASKEVMAHV-----
... -----
... HESPMVMLIPLGVLAAGAI FAGMLFAGPMTGE-DFRE----FW--
... GASILMLENSTAMLDAAHVPLWVKLLPLVLGVFGIALTYQMYIRR-----
... -----
... TDIPVQLAKTHSALYQFLLNKWYFDELYDFLFVRPAKAIGRFFWTF-GDGKVIDGLGPDGIA-
... GRVVLARRASQLQSGYMYHYAFAMLLGVAAFVSYFFFAGGH-----
119 >GAK32918_NuoL_alpha_proteobacterium_0-1
120 MSQF-----HIIIVFGPLLGLIAGLFA----KQIGDRGAMAVTTGLVTL SAILS AFVLKDVAF--DHNQ-
... YRILVL-EWVRSGSL SFDWTL YIDSLTAVMLVVNTVSALVHWYSIGYMSHDPH-----
... RARFFAYLSLFTFAMLMLVTSNQLVQMFFGWEGVGLASYLLIGFWFKKPSANAAAIAKAFVNVNRVGDGFGSLGIF
... ALFLLTGSVIF--EDIFQSLEGFADAR---
... FVFLGMDVHALTTIAVLLFVGAMGKSAQLFLHTWLPDAMEGPTPVSALIIHAATMVTAGVFLMARMSPILLELAPG
... ALTLIMIIGGATAFFAASVGLVQNDIKRVIAYSTCSQLGYMFVAIGASAYGAAIFHLFTHAFFKALLFLGAGSV
... IHAMSDEQDMRKMGGGLSKMVPLTYLMMMVGTALALT--GFPY-----
... TAGFFSKDMIIESAFATHNPAASFGFLMTVIAAFMFSFYSWRLVFMTFHGTTPR--ADEKTL SHV-----
... -----
... HESPAVMWVPLAILAVGAVIAGVVFSDAFIGE-GRLA---FW--AGSLVA-
... GEGDVMDEAHHIASWIKWLPTGMMALGFALSFLFYIAK-----
... -----PGLPAAMARTFPAAYQFLLNKWYFDELYDRIFIRPAFWIGRFLWVR-
... GDQKTIDGLGPDGIA-AQVMAAARRVRVLQSGYVYHYAFAMLI GIALVITYFVLTGGGF-----
121 >WP_150006121_NuoL_Iodidimonas_muriae
122 MSQFMSQ-FHIIIVFGPLLGLIAGLFG----RRLGDRGAMGVT TGLVTL SAVLSAFALKDVAF--DHNQ-
... YRILVL-EWVRSGTSL SFDWV LNI DTLTAVMLVVNTVSALVHWYSIGYMSHDPH-----
... RSRFFAYLSLFTFAMLMLVTSNQLVQMFFGWEGVGLASYLLIGFWFKKPSANAAAIAKAFVNVNRVGDGFGSLGIF
... ALFMLTGSVVF--ADIFASLDGVADAR---
... FIFLGYEVHALTTIAVLLFIGAMGKSAQLFLHTWLPDAMEGPTPVSALIIHAATMVTAGVFLMARMSPILELAPG
... AMTLIMVIGGATAFFAASVGLVQNDIKRVIAYSTCSQLGYMFVAIGASAYGAAIFHLFTHAFFKALLFLGAGSV
... IHAMSDEQDMRKMGGGLSKMIPLTYVMMMVGTALALT--GFPY-----
... TAGFFSKDMIIEAAFATHNSMGSGFLMTVVAAFMTSFYSWRLVFMTFHGTTPR--ADEKVM SHV-----
... -----
... HESPAVMWVPLAILAVGAI AAGFVFSDFYFIGH-DRFD---FW--AGALVT-
... SHGDVMDEAHHIPGWIKWLPTGMMALGFLLSVLFYVVK-----
... -----PGIPKSMAATFPGAYKFLLNKWYFDELYDRIFVRPAFWLGRVLWIR-
... GDQKTIDGFGPDGIA-ATVLA AAKRIRVLQSGYVYHYAFAMLI GIIAIVISYFVLTGGGF-----
123 >RMF12532_NuoL_Alphaproteobacteria_J084
124 MNQ-----FHVIVFGPLVGLIAGLFG----RRIGDRASMLL TSLLVSL SAVLSIPVFIDTAF--SGGQ-
... FSVPVL-EWVQV GMLHFTW SLHVDTLTAVMLVVTVVSSLVHWYSIGYMDEDPD-----
... KPRFFAYLSLFTFAMLMLVSADNLVQTFGWEGVGLASYLLIGFWFKKPSANAAAIAKAFVNVNRVGDGFGSLGIF
... ALFMVTGSVGF--EKIFAKVPSLAQAD---
... FIFLGHQAHALTVIGVLLFIGAMGKSAQILLHTWLPDAMEGPTPVSALIIHAATMVTAGVFLVARMSPLYEHAPA
... AADLVTFIGATTAFFAATVGLVQNDIKRVIAYSTCSQLGYMFVAAGVSAYGAAIFHLFTHAFFKALLFLGAGSV
... IHAMHHEQDMRRMGGLRPMIPLTYLMMIVGTALALT--GFPL-----
... TAGYFSKDSIIIEAFAHGGSIGEYAFVMTVVAAALTSFYSWRLIFLTFHGRPR--ASEEVL AHV-----
... -----
```

```
124... HESPAVMTIPLMVLAAGALFAGWGFHEFFVGE--ARGE---FW--NGALAA-  
... GGGRVLDHIHHLPTWITYLPTVMMVLGFVIAFWFYLAN-----  
... -----PAVPVALAQRMNGLYRFLLNKWFDELYDLLFVRPAFRIGRALWKI-  
... GDGRIIDGLGPDGVA-RAVMAGAARIRRIQTGCIYTYAFAMLIGVVLLVATVMLAERGF-----  
125 >NVJ99269_NuoL_Alphaproteobacteria_HF-Din21  
126 MES-----KFIVFLPLVGFLIAGMFG----RNIGDRASQVLTSSLVTIGAALSWYVFADVAF--VHNV-  
... YPVHVL-DWVKSGTLEFAWAFKIDTLTAVMLVVNTVSALVHWYSMGYMEEDPD-----  
... KPRFFAYLSLFTFAMLMLVTSNLDLQVMFFGWEGVGLASYLLIGFWFKKPSANAAAIAKAFVNVNRVGDGFGFALGIY  
... AVFLMTGSVEF--DVIFANIGDYQTAT---  
... MTFLGHEYHAITVICLLL FVGAMGKSAQLGLHTWLPDAMEGPTPVSAL IHAATMVTAGVFLVARFSPVFEYSEY  
... ALQVVTIVGASTAFFAASVGLVQNDIKRVIAYSTCSQLGYMFFALGVGAYGGAVFHLFTHAFFKALLFLGAGSV  
... IHALHHEQDMRNMGGFLFKKIPFTGTVMIIIGTLAIT--GVPF-----  
... LSGFYSKDLIEAAYASDAGASQFAFVMGVAAAFMTSFYSWRLIFLTFFGETR--AKQKYFDHA-----  
... -----  
... HEGPIFIKVPLAILALGALGAGFIFKEFFIGH-ERVA---FW--NGALVT-  
... AMDDVMEAAHHVPGAVIAAPFVVMLLGFLLAFAFYGRK-----  
... -----TDLPKRTAEMWDGLYAFLLNKWYWDEL YNFLFVRPAFWLGNVFWKR-  
... GDEQTIIDGFGPNGVS-AVAAVAARKARKLQTYVYHYAFAMIIGLAVVVTWFMASGAH-----  
127 >WP_121938164_NuoL_Eilatimonas_milleporae  
128 MLY-----KLIVFLPLIGFLVAGLFG----RRIGDRGSQLLTSGLVTSAILS WTAFVDVAL--LHNK-  
... YSIHVL-DWVTSGSLEFNWAFKIDTLTAVMLVVNSVSALVHWYSMGYMHEDPD-----  
... KPRFFAYLSLFTFAMLMLVTADNLDLQVMFFGWEGVGLASYLLIGFWYTKPSANAAAIAKAFVNVNRIGDFGFSLGIF  
... AVFVLFNTVQF--DGIFTQVETYKDAT---  
... MVFLGQEYHALTVISLLL FVGAMGKSAQLGLHTWLPDAMEGPTPVSAL IHAATMVTAGVFLVARFSPVFDLAPD  
... ALAVVTVIGAATAFFAATIGLVQNDIKRVIAYSTCSQLGYMFFALGVSAYGAAIFHLFTHAFFKALLFLGAGSV  
... IHAMHHEQDMRKMGGVRQYAPLTYGMMIIIGTLALT--GFPF-----  
... TAGYYSKDMIIEAAYASHSAGAQAFAFVMGVAAALMTSFYSWRLIFMTFTGECR--ADEHTRLHA-----  
... -----  
... HESPWIMLIPLVLLSLGALFAGFGFHEMFIGH-DRIA---FW--NGSLVT-  
... AAGDVIDEAHHVPPFGVKLAPMVAMALGFLMAWIMYIRS-----  
... -----TDIPGRLAKTWDGLYAFLLNKWYVDELYNLI FVRPAFWIGRQFWKR-  
... GDQQTIDGLGPNGVS-GAVAAIAARARKLQSGYLYHYAFAMIVGLALVVTWFMVRAGG-----  
129 >WP_191253427_NuoL_Kordiimonas_sediminis  
130 MMY-----KLIVFLPLIGFLFAGLFG----SKFSDRISQLVTAGLVTVSAVLSWMAFADVAL--GGNQ-  
... YTVLVL-EWVSSGALSFDWAFKIDTLTVVMLVVNSVSALVHWYSFGYMEDDPS-----  
... KPRFFGYLSLFTFAMLMLVTSNLDLQVMFFGWEGVGLASYLLIGYYYKKPSANAAAIAKAFVNVNRVGDGFGFSLGIF  
... GAFALFGSVMF--DDIFASADQYADYY---  
... INFLGTDHFHAITVICILL FVGAMGKSAQLGLHTWLPDAMEGPTPVSAL IHAATMVTAGVFLVARFSPVFEMSPT  
... ALAVVTIIGATTAFFAATVGLVQNDIKRVIAYSTCSQLGYMFFALGVSAYGAAIFHLFTHAFFKALLFLGSGAV  
... IHAMHHEQDMRNYGGLAKKIPFTFAMMTIGTIALT--GFPG-----  
... TAGFYSKDMILEAAYASHAFGAQYAFVLGIAAAFMTSFYSWRLAHLTFFGECR--ADEHTASHA-----  
... -----  
... HEAPWIMRLPLVILAVGALFAGVVFADMVGE-GRFA---FW--NGALVT-  
... SVGDVLDEAHHVPPFAVKAAPFVVMLLGFIFATVMYYKV-----  
... -----TDIPERMAKTWDGLYAFLLNKWYFDEL FNFIFIRPAFWLGRVFWKK-  
... GDEATIDGFGPNGVS-HAIAFVAARARKLQTYVYHYAFAMIIGLSLAITWFMVTGSSH-----  
131 >WP_068306026_NuoL_Kordiimonas_lacus  
132 MET-----AAKFIVFLPLVGFLIAGMFG----RTIGDRVSQVLTSSLVTIGAILS WLVFVDVAL--AGNK-
```

```
132... FVVTLL-DWVKSGDLEFAWALQVDTLTAVMLVVVNTVSALVHWYSMGYMEEDPD-----  
... KPRFFAYLSLFTFAMLMLVTSNQLVQMFFGWEGVGLASYLLIGFWFKKPSANAAAIAKAFVNVNRVGDGFGFALGIY  
... AVFLLTGSVQF--DVIFSTIGNYETAT---  
... LSFLGHEYHAITVVCLLLFVGAMGKSAQLGLHTWLPDAMEGPTPVSALHAATMVTAGVFLVARFSPVFEYSAY  
... ALEVVAIVGATTAFFAASVGLVQNDIKRVIAYSTCSQLGYMFFALGVGAYGGAIHFLFTHAFFKALLFLGAGSV  
... IHALHHEQDMRKMGGFLFKKIPITATVMTIGTLAIT--GFPL-----  
... LSGYYSKDLIIQAAFASDSSVAQYAFVMGVAAALMTSFYSWRLVWMTFFGETR--AKQKYFDA-----  
-----  
... HEGPITIMGPLLILATGAVFAGAVFSSYFVGD-DRVA---FW--NGALVT-  
... QMGDVMCAAQSVPMGVTLAPFVVMVLGFFISMMFYAPRIAMPKFAAAGLAVLTLALFIAAKFTDLHHIGFMKYV  
... GYFAGFAFAIFYYAYLYAAGKVTNDLPQRTATMWNGLYAFLLSKWYWDELYDFLFVRPAFWLGRVFWKR-  
... GDEQIDGFGPNGVS-STVALVAAKARKLQTGYVYHYAFAMIIGLAVVVTWFMASGAH-----  
133 >WP_068149388_NuoL_Kordiimonas_lipolytica  
134 MET-----AAKFIVFLPLVGFLIAGMFG----RQIGDRFSQVLTASLVTIGAILSWLVFVDVAL--AGNK-  
... FVVTLL-DWVKSGDLEFAWALKVDTLTAVMLVVVNSVSALVHWYSMGYMEEDPD-----  
... KPRFFAYLSLFTFAMLMLVTSNQLVQMFFGWEGVGLASYLLIGFWFKKPSANAAAIAKAFVNVNRVGDGFGFALGIY  
... AVFLLTGSVQF--DVIFGSIGNYQEAT---  
... LSFLGHDYHAITVVCLLLFVGAMGKSAQLGLHTWLPDAMEGPTPVSALHAATMVTAGVFLVARFSPVFEYSEY  
... ALQVVAIVGATTAFFAASVGLVQNDIKRVIAYSTCSQLGYMFFALGMGAYGGAIHFLFTHAFFKALLFLGAGSV  
... IHALHHEQDMRNMGGFLFKKIPMTGTVMLIGTLAIT--GFPL-----  
... LSGYYSKDLIIIEAAFASDSSVAQYAFVMGVAAALMTSFYSWRLVWLTFFGETR--AKQKYFDA-----  
-----  
... HEGPIFIKAPLVILALGAVFAGAVFKEYFVGH-ERVA---FW--NGSLVT-  
... QMGDVIDAAHNVPMGVTLAPFVVMVLGFFISMMFYAPRIALPKLPAAGLAVLTLALFIAAKFTDLHHVAGMTYV  
... GYFSGFAFAIFYYAYLYAAGKVTNDLPQRTATMWSGLYAFLLNKWYWDELYDFLFVRPAFWLGRVFWKR-  
... GDEQIDGFGPNGVS-ATVALVAAKARKLQTGYVYHYAFAMIIGLALVVTWFMASGAH-----  
135 >MB06503706_NuoL_Kordiimonadaceae_HXMU1429-5  
136 MLF-----KLIVFLPLVGFLIAGMFG----RQIGDRASMITSLVSIAGILSWFAFFDVTA--GGNQ-  
... YSVHVL-SWVTSGTLTFDWFHIDTLTAVMLIVVNTVSALVHWYSMGYMEEDPH-----  
... KPRFFAYLSLFTFAMLMLVTSNQLVQMFFGWEGVGLASYLLIGFWYKKPSANAAAIAKAFVNVNRVGDGFGFALGIY  
... AVFLLVGSVEF--STIFARIGEFETAT---  
... VSFLGTEYHAITVAALLLFGAMGKSAQLGLHTWLPDAMEGPTPVSALHAATMVTAGVFLVARFSPLFDLSPV  
... ALSVVTYIGAATALFAASVGLVQNDIKRVIAYSTCSQLGYMFFALGVTAYGGAIHFLFTHAFFKALLFLGAGSV  
... IHAMHHEQDMRKMGGIYKKIPLTYIVMLIGTLAIT--GVPF-----  
... LSGYYSKDLIIIEAAYAADAPGAQFAFVMTVVAALMTSFYSWRLIFLTFHGQTR--ADNHTFDHA-----  
-----  
... HEGPAVMTIPLIMLAVGALAAGGYFASSFIGD-GRFA---FW--NGALVT-  
... TAGDVMDLAHEVPSAVVWAPFIAMILGLFISACFYRPQIKMPAVAAFLAVAAVAVLVLPVPSQYA-----  
... GYAAVAALALSPLYVLFGAWGLSDDLPKRTAETWDGLYAFILNKWYFDELYDFLFVRPAFWLKGKIFWKK-  
... GDEATIDGFGPNGVS-ALVAGVAARVRKLQTGYVYHYAFAMIIGLALVVTWFMQGGAH-----  
137 >WP_194211999_NuoL_Kordiimonas_pumila  
138 MI-----PKAIVFLPLIGFLIVGILG----SKLGDKLSQIITASLVTVAAVFSWVVFADVMT--VHNT-  
... YDIHIL-DWVTSGTLSFNWALKIDTLTAVMLVVVNSVSALVHWYSMGYMEEDPN-----  
... KPRFFAYLSLFTFAMLMLVTSNQLVQMFFGWEGVGLASYLLIGFWYKKPSANAAAIAKAFVNVNRVGDGFGFALGIY  
... AVFVLFVSVEF--ETIFANAGNYQDAT---  
... LNFLGHDYHALTVICLLLFVGAMGKSAQLGLHTWLPDAMEGPTPVSALHAATMVTAGVFLVARFSPVFOYSPD  
... ALAVVTVVGAMTAFFAASVGLVQNDIKRVIAYSTCSQLGYMFFALGVGAYGGAIHFLFTHAFFKALLFLGAGSV  
... IHAMHHEQDMRNMGGLYKKIPFTFGVMLVGTLAIT--GFPF-----
```

```
138... LSGYFSKDMIIEAAYASHSAGSEFAFVMGVTAALMTSFYSWRLIYMTFFGKTR--ADHHTFDHA-----  
-----  
... HEGPWVMRIPLFLLAVGAVFAGGVFAGEFIGH-DKVE---FW--NNALVV-  
... AAGDVMDEAHHVPAAVKFAPFVAMVLGFLVATFFYLK-----  
-----SDIAERTAETWDGLYKFLLNKWFDELYNLIFVRPAFWLGRQLWKR-  
... GDEQTIIDGFGPNGVS-HAVAVIATKVRKLTQGYVYHYAFAMIVGLAAVVTWFMVNTGGSH-----  
139 >WP_201240297_NuoL_Rhodothalassium_salexigens  
140 MI-----ELIVFLPLAGFLAAGLAG----QSLGDRGSMLLTSSFVTVSALLSVALFFEVS----  
... GNPDAFHTVTLGSWIASGDLAIDWALRVDTLTAVMLVVVNGVSALVHWYSVGYMAHDPS-----  
... KPRFFAYLSLFTFAMLMLVTADNLVQMFFGWEGVGLASYLLIGFWYQKPSANAASIKAFVVRIGDFGYSLGIF  
... ATFLLFGSVQF--DTIFANVDAVKGTT---  
... LDFVGYDVPALTLVALLL FVGAMGKSAQLILHTWLPDAMEGPTPVSAL IHAATMVTAGVFLIARMSPLFEAAPD  
... ALAVVTVIGAATAFFAATVGLVQNDIKRVIAYSTCSQLGYMFFALGVGAYGAGIFHLFTHAFFKALMFLSAGSV  
... IHALSDEQDMRRMGGLRPHLQTTWALMLVGTALALTGVGIPG-----  
... LIGFSGFYSKDIVIEAAYAGEVGGSLFAFVMGIAAVFMTSFYSWRLMFMTFENKPR--ASKDVMGHI-----  
-----  
... HESPMVMLVPLFVLAGGAVFAGLAFQDWFVGD-GRLA---FW--AGSIVQ-  
... GEHDVIEQAHHVSKWVKWLPTAMMALGLGAAWLFYIRS-----  
-----PQLPGQVAASAKGLYQFLLNKWFDELYRALIVRPV FALGRLLWIA-  
... GDQKTIDGLGPDGVS-RTL VAGGKRMRRVQSGYVYHYAFAMLVGVVILVSYIAFYSGGF-----  
141 >WP_132706734_NuoL_Rhodothalassium_salexigens  
142 MI-----ELIVFLPLAGFLAAGLAG----QSLGDRGSMLLTSSFVTVSALLSVALFFEVS----  
... GNPDAFHTVTLGSWIQSGDLAIDWALRVDTLTAVMLVVVNGVSALVHWYSVGYMAHDPS-----  
... KPRFFAYLSLFTFAMLMLVTADNLVQMFFGWEGVGLASYLLIGFWYQKPSANAASIKAFVVRIGDFGYSLGIF  
... ATFLLFGSVQF--DTIFANVDAVKGTT---  
... LDFVGYDVPALTLVALLL FVGAMGKSAQLILHIWLPDAMEGPTPVSAL IHAATMVTAGVFLVARMSPLEAAPD  
... ALAVVTVIGAATAFFAATVGLVQNDIKRVIAYSTCSQLGYMFFALGVGAYGAGIFHLFTHAFFKALMFLSAGSV  
... IHALSDEQDMRQMGLRPHLRRTTWALMLVGTALALTGVGIPG-----  
... LIGFSGFYSKDIVIEAAYAGEVGGSLFAFVMGVAAAFMTSFYSWRLMFMTFENKPR--ASKDVM SHI-----  
-----  
... HESPMVMLVPLFVLAGGAVFAGFAFQDWFVGD-GRLA---FW--AGSIVQ-  
... GEHDVVDKAHHVSKWVEWLPTAMMALGLGAAWLFYIRS-----  
-----PQLPGQVAASAKGLYQFLLNKWFDELYRALIVRPI FALGRLLWIG-  
... GDQKTIDGLGPDGVS-RTL VAGAKRMRRVQSGYVYHYAFAMLIGVVILVSYIAFYSGGF-----  
143 >PPR16856_NuoL_Alphaproteobacteria_MarineAlpha9_Bin3  
144 ML-----KLLVFLPLMGSVLSGLFP----KFLGKKGVMWLP TLF SFLSLLFSIILLSQAI---TGES-  
... YITHLG-YWVNSEALTVSWSLRLDVL SAVMLFVVMLVSSLVHLYSIGYMDHDEH-----  
... KSRFFSYLSLFTFAMLMLVTSNNFLQLFFGWEGVGLCSYLLIGFWFKKQSANAAA IKA FIVNRVGD LGLILGIC  
... IIYKLTGSLDF--DKVFEKTSLFLESS---  
... ILFFNFSIPYIELACFL LFIGAMGKSAQIGLHTWLADAMEGPTPVSAL IHAATMVTAGVFLVARCSPLFEYAPV  
... ALNFVILVGAITSIFAACIAITQNDIKKIIAYSTCSQLGYMFFACGVSAYSAGMFHLMTHAFFKALLFLGAGSV  
... IHALSDEQDIRKMGLAKVLPYTCAAMWIGSLALA--GLPP-----  
... FAGFFSKDIILEAAWGHSIFGYIAFYLG LIAAFLTAFYSWKILFMVFHGKPR-----TDISKA-----  
-----  
... HESPLYILIPLLILSIGAIISGWLGYSM-VDT-HHD-----FW--  
... LESILILDNHQALVNAHHVPLLVLKLSPIIVAILGIYFAWIFYIKK-----  
-----  
... VDLPKKNADKFPKLYNISKNKFWFDEIYDLILTRQLKNIGNILWTK-GDIRIIDRFGPNGIA-
```

```
144... YFCSRLASKIRSFQSGYVYHYAFTMFFGLIILFSWQFLIYFGW-----
145 >AIL65955_NuoL_Rickettsiales_Ac37b
146 MKNEI----VFLVFIPLITSVISGLFM----QRVNAALAQLTCIGMAISSFSLIIFYNIIIK--GYNY-
... NTVELL--RWIEINELVVNWALKVDALTAVMLVVTVVSFLVHVYVSGYMHDDQH-----
... KPRFMSYLSLFTFFMLMLVTSDFLQFLGWEGVGLCSYLLIGFWYQKNSANLAAMKAFIVNRVGDVGFILGIF
... SIYLI FNSLQF--DQIFKLVNEYSYKT----
... FNILGYNISAIIEISCMLLFIGCMGKSAQLGLHIWLPDAMEGPTPVSALIIHAATMVTAGVFLLRCSWLFQYAPI
... VLYIITVIGALTCIFAATIALTQNDIKKIIAYSTCSQLGYMFFACGVSAYNVALFHLATHAFFKALLFLGAGSV
... IHAMSGEQDINKMGGIWRKIPFTYLMWIGSLALA--GIYP-----
... FAGYYSKDMIIEAAYLSPSESGRFAYWIGISAAFCTAFYSWRLLIKVFHGKFK--NEPTVWKRV-----
... -----
... HESPLFMTIPLFILSLGAI FSGIIGEKLHIVD--NTNK---FW--HGAIEIFHSHS-----
... HHIPVLYKFMMPMGVILGIVIAVIYVVF-----
... -----KVL PDITKSTISPLYNLSYYKYYWDEIYIYIVIKPIRCLSVVLWKK-
... IDNVIIDGLGPNV--KIINLLSTKVTMGTGLYHYAYIMLGAVMVLTSWYIFNIIN-----
147 >WP_041471749_NuoL_Rickettsia_conorii
148 MYQNICI--MMIIMPLASSIINGLFL----RVIDKLAQVIATGFLSLSALFSLIIFCDTGL--DGNI-
... IHIKLL--PWIEVGTFKVNWISIYIDQLTSIMFIAVTWVSSIVHIYSLGYMAEDKG-----
... IIRFLSFLSLFTFFMLMLVSSDFLQFLGWEGVGVCSYLLIGFWYSKESANKAAIKAFIINRASDFAFILGVI
... TIIVYCGSANY--KVLSSAELLSNIK----IFL--
... HFSILDIICLLLFIGCMGKSAQIGLHVWLPDAMEGPTPVSALIIHAATMVTAGVFLVARCSYLFYYSPLILQFIT
... IIGGVTCLEFAASIAIMHSDIKKIIAYSTCSQLGYMFMACGVSAYNSGIFHLVTHAFFKALLFLSAGSVIHAVH-
... EQDIFKMGDLRNKMPVTYGNFLIGSLALI--GIYP-----LAGFYKDSILEAAYSS----
... GSFMFIFGIAAAILTAIYSMKIIMLVFHGKTK--LEKDVFEHA-----
... -----HEPAKVMNNPLILLVVG SFFSGMIGYLLAMD--KPNG---YF--
... HASLFNLHIYKLL--ISHPPLYIKLLPMAVGIVGIVTGIYLYKSSTV-----
... -----
... MSFPQKILRSSRGMTPVLVNLKYYFDEIYNCLIVKPINCLASLFYL--GDQI IDRFGPNGFS-
... RVVNCFSVLTGKIQTGYVFNALYIVSFIVVTISYFVWKNIMY-----
149 >AEI88434_NuoL_Candidatus_Midichloria_mitochondrii
150 MNMYLHNL SLSVFLPLLASIPVGLNT----NKVKPVIAQIITISFVSI AAI FSWIIFYYTCF--DGQI-
... IHLKLI--NWLNLGELKADWSIYIDPLTAIMFLVNTVSTLVHIYSVSYMSHDPN-----
... QPRFFSYLSLFTFFMLVLSADNFAQLFVGWEGVGLSSYLLIGFWFHKKSAYSAAAMKAFLVNRVGDIGLAIGIF
... LIAMKFGSVEY--ATVFSKTKYLSEET---
... INFLSVDTRLLTVICIALFIGCMGKSAQLGLHTWLPDAMEGPTPVSALIIHAATMVTAGVFLLRCSYLFYSEI
... ALDLVTIVGAATCLFAATIATAQNDIKKIIAYSTCSQLGYMFFACGVSAYSAGIFHLLTHAFFKALLFLGAGSI
... IHALADEQNIKKMGGIWKLPYTHALMWIGSIALA--GIPP-----
... LSGFFSKDLILEAAYASDSRFGHLAYWLGVAATLTAFYSCRLFLV FYAPT N--ADKKIFTEI-----
... -----
... HEAPQSMMIPLMVLGIGSLICGYIGYHIIDIS--NLS----FW--
... SGAI FVLQEHDSIDKIDTIGHWVAQIPLLAALFAMLLAYYSYILK-----
... -----
... PIVSSWSYKNFRNINSFLEKKWYFDEVYEFILIKPVKLLGTSLWRF--VDVGFIDGI--PNYSA-
... RAVARFAKVAQLLQTGYIYHYAMAMLIGVMILVYWYLPW-----
151 >WP_038464876_NuoL_andidatus_Paracaedibacter_acanthamoebae
152 --SVTHLSAMVAVFAPFIFGILSSLGI----RYRGDRFSQWVTCLFMLTATVAGGVLFYHIVF--MQGA-
... TVIKLL--DWMNVGGFQAHWGFKLDTLSTTMIMVNVIVSLLVHVYVSGYMSQDKS-----
... IPRFMGYLSFFTFTMLMLVTSDFLQFLGWEGVGVASYLLIGFWYERQSAGAAAMKAFIVNRVGDVGLALGIA
```

```
152... SLFLLTGTVEF--
... DGALSQITTTMAAGQRPELSFWGHSFDAINLIGILLFIGAMGKSAQLGLHTWLPDAMEGPTPVSALIIHAATMVTA
... GVFLVCRMSPLYEVAPFAREMIVIVGASTAFFAATVALTQTDIKRVIAYSTCSQLGYMFFAAGCSAYGAAMFHL
... VTHAFFKALLFLGAGSVIHAMSDEQNMNRMGGIYKLIPTTYALMWIGSLALA--GIPL-----
... FAGYYSKDAIIESAYLTGTSIGDYAFAIGLIVAFLLTAFYSWRLLLLSFHGKQH--ADDTVMAHV-----
-----
... HESPVVMLLPLFVLSLGAIFSGYLANDWFVGH-KMAE---FW--GSAIAL-PRQP-----
... HHELPTWVIYSPLAAAVSGIVFAYLFYGGA-----
-----RRLPQWIATKMSILYNFSYRKWFIDELYDILFVNRAFLGLQILWQK-
... GDIGLIDRYGPDGVT-RLSMLVSRFMSYFQTGYVYHYAFAMIVGVLLLLTWYLRGEIG-----
153 >WP_033444476_NuoL_Candidatus_Odyssella_thessalonicensis
154 MH----LSAI-AVFAPLLGFILSSLGI----RYLGDRFSQFITCLLMLIAAVAGATLFYEVVF--LRKD-
... TVIELL-SWINVGEFQANWGLKLDLSTTMIGVVNTVSLLVHIYSIGYMSHDKS-----
... IARFMSYLSFFFTTMLMLVTAPNLVQMFFGWEGVGVASYLLIGFWYERQSAGAAAMKAFIVNRVGDVGLALGIA
... TAFLLTGTVDF--
... DGVISTVTQIASAQRPSLNFWGYECDAINLLGILLFIGAMGKSAQLGLHTWLPDAMEGPTPVSALIIHAATMVTA
... GVFLVCRMSPVYEVAPVAREMIIIVGASTAFFAASIALTQTDIKRVIAYSTCSQLGYMFFAAGCSAYGAAMFHL
... VTHAFFKALLFLGAGSVIHAMSDEQDINRMGGIYKLIPTTYVLMWIGSLALA--GIPL-----
... FAGYYSKDAIIESAYLTGTGAGDYAFWIGLLVAFLLTAFYSWRLLLLAFHGSPK--ADDRVMAHV-----
-----
... HESPFVMLLPLFVLSVGAIFSGYLAHDWFVGT-KMAE---FW--NGAIAL-PHHH-----
... HSNLPAWVVYSPLVAAVSGIVTAYLFYSKS-----
-----QTPVQLIASKLSALYTFYSYRKWFIDELYNVLFVNRAFGIGQMLWQK-
... GDVGFIDRLGPNGIS-RVSLGLSRLVSYLQTYVYHYAFAMILGVLLLLTWYIKGQMG-----
155 >MBN8803795_NuoL_Sphingopyxis_terrae
156 MI-----QAIIVFLPLLAALVAGLGQ----RAIGTTAAKLVTTGALFASCALSWPIFLSFVA--
... GTGEAGVTPVL-HWVSSGALQFNWELRVDTLTAVMLVVITVSALVHLYSWGYMSEDPD-----
... QPRFFAYLSLFTFAMLMLVTANNLVQMFFGWEGVGLASYLLIGFWYKKPSANAAAIKAFVVRVGDVGLGIF
... GTFLVFGTVSI--PEILAAAPGMAGST---
... IGFLGHRFDTMTVLCLLLFIGAMGKSAQLGLHTWLPDAMEGPTPVSALIIHAATMVTAGVFMVCRLSPMFEAAPV
... AAGVTVFVGAATCFFAATVGTQWDIKRVIAYSTCSQLGYMFFAAGVGAYGAAMFHLFTHAFFKALLFLGAGSV
... IHAMHHEQDMRYYGGLRKHIPLYWAMMMGTLAIT--GVGIAGV----AGFAGFYSKDGILEAAFAA-
... GGGGQIAFWVGIFAALLTSFYSWRLVFLTFYGGKPRWEQSEHIQHAVHDDHGHGHDD-----
... HAHAPHQ--DAHGDGTAGYHP-----HESPINMLIPLGVLSLGAVFAGMLFNHQFIYPEEGAA--
... -FW--KGSALF-NEHL-MHAAHEVPLVWKWMPFTVMAIGLFLAWNSYIRN-----
-----
... TTLPARFVAQFSLLHKFLFNKWFDELYNFLFVKPAFAIGRFFWKR-GDEGTIDRFPGNGVA-
... ALVQGGTRLAVRLQSGYVYGYAFVMLLGLVGLASWAMVK-FQ-----
157 >WP_185664684_NuoL_Novosphingobium_flavum
158 MHS----ILFIVFLPLLAIVAGLGN----KALGNVPAKVITTGALFISCALSWPIFLSFVA--
... GSAEASVTPVL-KWVQSGSMSFDWALRVDTLTAVMLVVITSVSALVHLYSWGYMDEEPPD-----
... QPRFFAYLSLFTFAMLMLVTADNLVQMFFGWEGVGLASYLLIGFWFRKPSACSAAIKAFVVRVGDVGLGIF
... GTWLVFQTTSI--PEILHAAPSMAGST---
... IGFLGHRFDTMTVLCVLLFIGAMGKSAQLGLHTWLPDAMEGPTPVSALIIHAATMVTAGVFMVCRLSPMFVVSPT
... AMGVTVFVGAATCFFAATVGTQWDIKRVIAYSTCSQLGYMFFAAGSGAFGAAMFHLFTHAFFKALLFLGAGSV
... IHAMHHEQDMRYYGALRKEIPWTFWAMMAGTLAIT--GVGIVDV----
... IGFAFYKDSILEAAYASGSEVGSFAFWCGITAALMTSFYSWRLVFLTFYGAAPRWAASEHIQHAVHGEHEDAD
... AEDGHDH-----DHSHELLD--PHHGEGTAGYHP-----
```





```
166... GTATSHVAPVL-NWMQSGSLDVAWQLRVDTLTAVMLVVVTTVSALVHLYSWGYMDEDPD-----  
... QPRFFAYLSLFSFAMLMLVTANNLIQMFFGWEGVGLASYLLIGFWFRKPSANAAAIAKAFVVRVGD LGFMLGIF  
... GTFLVFGTVSI--PDILAAAPHMAGST---  
... IGFLWFRADTTTVLCLLLFIGAMGKSAQIGLHTWLPDAMEGPTPVSALHAATMVTAGVFMVCRLSPLFETSHT  
... AMAFVTAIGAITCFFAATIGTVQRDIKRVIAYSTCSQLGYMFFAAGVGAYGTAMFHLMTHAFFKALLFLSAGSV  
... IHAMHHEQDMRYYGGLRKHIPVTFWAMMAGTLAIT--GVGIFG-----IGFAGYYSKDAIIESAYAAG--  
... PGGYFAYWMGVIAALLTSFYSWRLMFLTFWGKPRWEQSEHIQHALHDAHGHGHHDH-----  
... -AGHDHDAPEGTGGYKP-----HESPVVMLIPLIVLSIGAVFAGAAFHHFFSDPGAGER---FW  
... --KGSLEFF-NEHL-AHATEEIPAWAKYGATAAMLLGLIPAWFAYIRS-----  
-----  
... TDLPKAFADQWRVLYLFLLNKWFDELYNWL FVRPAFAIGRLLWKR-GDEGTIDRFGPNGSA-  
... AIVALGSRIAGRLQSGYVYSYAFVMLIGLTAAITWVIAG-----  
167 >WP_176868685_NuoL_Parasphingopyxis_algicola  
168 MIQ-----LIVFLPLLAIVAGLGN----RMLGNFVAKLLTTGALFVACALSWPIFLDFMI--  
... GGQQAYVAPVF-DWIRSGMDVAWSLRVDTLTAVMLVVVTTVSALVHLYSWGYMEDDPD-----  
... QPRFFAYLSLFTFAMLMLVTSNNLVQMFFGWEGVGLASYLLIGFWYHKPSANAAAIAKAFVVRVGD FGFSLGIF  
... GTFLVFGTVSI--PEILEAAPAMAGST---  
... IGFLGYRVDTMTLLCLLLFIGAMGKSAQFGLHTWLPDAMEGPTPVSALHAATMVTAGVFMVCRLSPMFETS DM  
... ALAVVTFVGLLTAFFAATVGT AQMDIKRVIAYSTCSQLGYMFAAGVGAYGIAMFHLFTHAFFKALLFLGAGSV  
... IHAMHHEQDMRHYGALRKEIPLTFWAMIIGTLSIT--GVGIVGI-----  
... FGFAGFYSKDLIEAAFASATEMGGIAFFTLVFAALLTSFYSWRLIFLTFFGKPRWITSEHIQHSVHKTPET--  
... -----AEDATGGYHP-----  
... HESPWSMLIPLGVLSLGAILAGYLFYYPFGYAEQGEI---FW--AGSIAL-DTHL-  
... LHAIHEVPTWVKYAPGAVMLVGLAIAWLAYIRY-----  
... -----TDWPQKFVDQFRLHAFLYNKWYIDELYDLIFVRPAFAIGRFLWKR-  
... GDKGFIDRFGPDGVS-ALVASGSGVTRRFQSGYLYTYALVMLIGLAAAATWAITR-----  
169 >WP_072595757_NuoL_Tardibacter_chloracetimidivorans  
170 MIQ-----ALVFLPLVAALIAGLGN----RAIGNVPAKLLTTGALFISCALAWGIFLPMMG--  
... GQTQPYVAHVL-DFIHSGDLNVAWSLRVDMLTAVMLVVVTTVSALVHLYSWGYMAEDPD-----  
... QPRFFAYLSLFTFAMLMLVTADNLVQMFFGWEGVGLASYLLIGFWYHKPSANAAAIAKAFVVRVGD FGFSLGIF  
... GTFLVFGTVSI--PAILAAPDMAGST---  
... IGFLGMRMDTMTLLCLLLFIGAMGKSAQLGLHTWLPDAMEGPTPVSALHAATMVTAGVFMVCRLSPMFETS VT  
... ATNVVIYVGAATALFAATVGT VQNDIKRVIAYSTCSQLGYMFFAAGVGAYSAMFHLFTHAFFKALLFLGAGSV  
... IHAMHHEQDMRFYGGGLRRHIPLTFWAMTAGTLAIT--GVGVIGV-----  
... FGFAGFYSKDAIIEAFAAGGQAGYAAFAVGVFAALLTSFYSWRLVFLTFFGQPRWAASEHIQHAVHGDHHDHP  
... DAEDAGQETE-----AHSHGHVHPAKGTAGYHP-----  
... HESPWTMLVPLGV LALGAVFAGFIFHHGFIDVEGN-----FW--NGSIAF-DAHL-  
... MHAMHEVPLWVKLSPAAMLLGLFLAWNSYIRN-----  
... -----PALPGAFVAQFRGLYAFLLNKWYFDELYNVL FVRPALAIGRFFWKK-  
... GDVGTIDRFGPDGMA-AVVAGGSVAARRLQTGYVYTYALVMLLGIAAAATWAMVR-----  
171 >WP_079638416_NuoL_Sphingopyxis_flava  
172 MIQ-----AIVFLPLLAALVAGLGQ----RFIGTAASKIVTTGALFASCALSWPIFLSFLG--  
... GDAEASVTPVL-HWVSSGALQFNWELRVDTLTAVMLVVITTVSALVHLYSWGYMEEDPD-----  
... QPRFFAYLSLFTFAMLMLVTANNLVQMFFGWEGVGLASYLLIGFWYKKPSANAAAIAKAFVVRVGD LGFMLGIF  
... GTFLVFNTVSI--PEILAAPGMAGST---  
... IGFLGQRFDTMTVLCLLLFIGAMGKSAQLGLHTWLPDAMEGPTPVSALHAATMVTAGVFMVCRLSPMF EVAPI  
... ALGVVTFVGAATCLFAATVGT TQWDIKRVIAYSTCSQLGYMFFAAGVGAYGAAMFHLFTHAFFKALLFLGAGSV  
... IHAMHHEQDMRYYGGLRKHIPLTYWAMMAGTLAIT--GVGIAGV-----FGFAGFYSKDGILEAAYASGGGGQIA
```

```
172... -FWVGTFAALLTSFYSWRLVFLTFFGKPRWAASEHIQHAVHGDHHRPADEHAGGDVHH-----  
...  AHAADAHEGTAGYHP-----HESPLSMLIPLGVLSVGAI FAGYLFHHPFIYPEEGMA----FW--  
...  NGLSALF-DAHL-MHAAHEVPTLIKWMPFAAMAIGLLIAWNSYIRN-----  
...  -----  
...  TALPARFVAQFGLLHQFLFNKWFDELYNLLFVKPAFAIGRFFWKR-GDEGTIDRFGPDGVA-  
...  ALVQGGTRLAVRLQSGYVYGYAFVMLLGLVGLASWVMVRFL-----  
173 >GGD46181_NuoL_Croceicoccus_pelagius  
174 MIE-----IIVFAPLLAAIIAGLGN----RMIGNMPAKIVTTGALFLSCALSWPIFLGFMT--  
...  GSETAYVDPVL-KWVQSGGMNFDWSLRVDLTAVMLVVITSVSALVHLYSWG YMDEDPD-----  
...  QPRFFAYLSLFTFAMLMLVTADNLVQMFFGWEGVGLASYLLIGFWFKKPSASAAAIKAFV VNRVGD LGFMMGIF  
...  GVFLVFGTTSI--PEILDRAPEMAGST---  
...  IGFLGMRVDTMTVLCLLLFIGAMGKSAQLGLHTWLPDAMEGPTPVSAL IHAATMVTAGVFMVCRLSPLFETSQT  
...  ALTFVTFIGAATCFFAATIGTTQTDIKRVIAYSTCSQLGYMFFAAGVGAYGAAMFHLFTHAFFKALLFLGAGSV  
...  IHAMHHEQDMRYYGGLRKQIPITFWAMMAGTLAIT--GVGIWFLH---  
...  IGFAGFYSKDAILESASFASGSEMGOFAFVMGIVAALLTSFYSWRLMFLTFWGKPRWIESEHIQHTVHKTPEEAG  
...  A-----DTTGGYHP-----  
...  HESPWVMLTPLVILSLGAVFAGAIWSHSFLDSA E-----FW--NGSIFY-NEHL-  
...  IHAMHNVPWTWKIAPGAVMLIGLLIAWNNYIRD-----  
...  -----PDAPARFVGMFGGIYTF LKNKWFDELYNVIFVKPAFWLGRKFWKW-  
...  GDVGTIDRFGPDGAA-WVVAQGSRYAQKVQTYLYSYALVMLLGLLAAISWIMVR-----  
175 >WP_066770280_NuoL_Croceicoccus_mobilis  
176 MIQ-----ILVFLPLLAIVAGL FN----RQLGNLPAKIITTGALFISCALAWPIFIGFLT--  
...  GSAEAYVAPVL-KWVQSGDMSFDWALRVDLTAVMLVVITSVSALVHLYSWG YMDEEPD-----  
...  QARFFAYLSLFTFAMLMLVTADNLVQMFFGWEGVGLASYLLIGFWFRKPSANAAAMKAFV VNRVGD LGFMLGIF  
...  GTFLVFGTTSI--SEILSAAPGMAGSS---  
...  ITFMSMRLQTM DILCLLLFVGAMGKSAQLGLHTWLPDAMEGPTPVSAL IHAATMVTAGVFMVCRLSPMFEAAPV  
...  ALAFVTFIGAATCFFAATIGTTQTDIKRVIAYSTCSQLGYMFFAAGVGAYNAAMFHLFTHAFFKALLFLGAGSV  
...  IHAMHHEQDMRYYGGLRKKIPLTFWAMMAGTLAIT--GVGLWFAH---  
...  AGFAGFHSKDAILES AFAKGT ELSQFAFFMGIVAALLTSFYSWRLMFLTFWGKPRWIESEHIQHSVHKTPEEAG  
...  E-----DTTGGYHP-----  
...  HESPLVMLIPLIVLSIGAVFAGFAFTHSFLDSSD-----FW--DNSLFY-NEHL-  
...  VHAMHEVPTWVKLAPGIVMLIGLAIWNNYIRD-----  
...  -----PGAPARFVGQFGFVYTF LKNKWFDELYHTIFVKPAFWLGRKFWKI-  
...  GDVGIIDRFGPNGAA-WVVAASSRFASKVQTYLYSYALIMLLGLVAAVSWIIATAGQ-----  
177 >WP_119034702_NuoL_Hephaestia_caeni  
178 GDRVTSTFILLIVFLPLLA AVIAGLGN----RALGNVAAKT VTTGALFVACALSWPIFFSYLA--  
...  GTATATVVPVF-DWINS GSMHIGWALRVDALTAVMLVVVTTVSALVHLYSWG YMEEDPD-----  
...  QPRFFAYLSLFTFAMLMLVTADNIVQMFFGWEGVGLASYLLIGFWFKKPSANAAAIKAFV VNRVGD LGFMLGIF  
...  GTYLVFNTISI--PEILAAAPNMAGST---  
...  IGFLWFRADTMTVLCLLLFVGAMGKSAQLGLHTWLPDAMEGPTPVSAL IHAATMVTAGVFMVCRLSPMFEASPT  
...  ALGVVTFIGAATCLFAATIGCVQTDIKRVIAYSTCSQLGYMFFAAGVGAFGGAMFHLFTHAFFKALLFLCAGSV  
...  IVAMHHEQDMRFYGGGLRKRI PVTFWAMVAGTLAIT--GVGLPGIGGLAFGFAGFHSKDAVLEASFASGYGGEI-  
...  AWWVGTFAALLTSFYSWRLIFLTFFGKPRWVESEHIQH ALHDEHGHGAHHGDGAHG-----  
...  -HENEAGTGGYRP-----HESPLSILIPLVLLSVGAVAAGYAFQNYFIAPDAGET----FW--  
...  KGALYH-SEHL-MHAMHEVPVWVKLGPTIVMLIGLYVAWLAYIRK-----  
...  -----  
...  TDIPAHTAKAFEPVYRFLLNKWFVDELYDLLFVRPAFAIGRLFWRK-GDEGTIDRLGPNGIA-  
...  AVIDGGSRVAGRLQSGYVYTYAFVMLIGLTA AVTWA IAG-----
```

```
179 >WP_156500484_NuoL_Croceicoccus_bisphenolivorans
180 MPV-----IKIIVFAPLLASIIAGLGN----RAMGNFAAKVVTTGALFLSCALSWPIFLGFMT--
... GAESAYVEPVL-KWVQSGTMTFDWALRVDTLTAVMLVVITSVSALVHLYSWGMYMDEDPD-----
... QPRFFAYLSLFTFAMLMMLVTADNLVQMFFGWEGVGLASYLLIGFWFRKPSASAAAIAKAFVNVNRVGD LGFMMGIF
... GVFLVFGTTSI--PEILDRAPEMAGSS---
... IGFLGYRVDTMTVLCILLFIGAMGKSAQLGLHTWLPDAMEGPTPVSALHAATMVTAGVFMVCRLSPLFETSQM
... ALTFVTFIGAATCFFAATIGTTQTDIKRVIAYSTCSQLGYMFFAAGVGAYGAAMFHLFTHAFFKALLFLGAGSV
... IHAMHHEQDMRYYGGLRKHIPITFWAMMAGTLAIT--GVGIWFLH---
... IGFAGFYSKDAILESAFASGTEMGQFAFFMGIVAALLTSFYSWRLMFLTFWGKPRWEQSEHIQHAVYGHHEEPS
... EESDDHHEH-----AHASHGDGTAGYHP-----
... HESPWVMLTPLVVLSLGAVLAGAIWSHSFLDSAEE-----FW--NGSIFY-NEHL-
... IHAMHNVPTWVKIAPGAAMLIGLAIWNNYIRD-----
... -----PGAAGRFVGMFGGVYTF LKNKWYFDEVYHTIFVKPAFWLGRKFWKW-
... GDEGTIDRFGPNGAA-WVVAQGSRYAQKVQTGYLYSYALVMLLGLVAAISWVMANGLGH-----
181 >RXR30042_NuoL_Sphingobium_fluiale
182 -----MLLIVFLPLLAIIAGLGN----KALGKLPKALITTGALFVSCALSWPIFLSYVA--
... GDAGPTVVPVL-HWLSSGSFEAAWELRVDALTA VMLVVVTSVSALVHLYSWGMYMDEEPD-----
... QPRFFAYLSLFTFAMLMMLVTANNLLQMFFGWEGVGLASYLLIGFWFRKPSASAAAIAKAFVNVNRVGD LGFMLGIF
... GTYLVFDTISI--PDILAAAPGMAGST---
... IGFLGYRFDTMTVLCLLL FVGACGKSAQLGLHTWLPDAMEGPTPVSALHAATMVTAGVFMVCRLSPMFETSET
... ALAVVTYVGAATCLFAATVGTTQNDIKRVIAYSTCSQLGYMFFAAGVGAYGAAMFHLFTHAFFKALLFLGAGSV
... IHAMHHEQDMRYYGALRKEIPITFWAMTAGTLAIT--GVGIPGTL---FGFAGFFSKDSIIESAYAAGGPGTT-
... AFLIGITAALLTSFYSWRLVFLTFFGKARWAGSEHIQHAVHDAHGHDSHGHDDHAHD-----
... DHHGHDAHAIGTAGYHP-----HESPLVMLIPLIVLSIGAVAAGFVFHAFIDAEGGAQ---FW-
... -APSTLAFDAHL-MHASHEVPLWVKWSPFAVMATGLMIAYMAYIRH-----
... -----
... TDWPAKFTAQFHVLYDFLLNKWYFDELYDMLFVKPAFAIGRFFWKR-GDEGTIDRFGPNGMA-
... ALVVAGGRLTRRLQSGYLYTYALVMLLGLAAAVTWAITVS-----
183 >WP_046902666_NuoL_Altererythrobacter_atlanticus
184 MSS-----VLVIVFLPLLAIIAGFGN----RAIGNVAAKVVTTGALLIACALSWPIFITFLA--
... GDVPTTVVPVL-KWVQSGALTFDWALRVDTLTAIMLVVVVTSVSALVHLYSWGMYMSEDPD-----
... QPRFFAYLSLFTFAMLMMLVTADNLVQMFFGWEGVGLASYLLIGFWFRKPSASAAAIAKAFVNVNRVGD LGFMLGIF
... GTFLVFQTTSI--AEILEAAPAMKGAS--
... TIGFLGMQLDTMTIICLLL FVGAMGKSAQLGLHTWLPDAMEGPTPVSALHAATMVTAGVFMVCRLSPMFEAAP
... AALTFVTFVGGATCFFAATVGTTQWDIKRVIAYSTCSQLGYMFFAAGVGAYGAAMFHLFTHAFFKALLFLGAGS
... VIHAMHHEQDMRYYGGLRKHIPITFWAMMAGTLAIT--GVGIYWLH---
... AGFAGFHSKDAILEAAFAFASGTEMGRTAFWLGAFAALLTSFYSWRLMFLTFWGKPRWAESEHIQHAVHHGHAEPN
... DANPPSQED-----AGHDVAHHVPSNDHEDGTAGYHP-----
... HESPWVMLVPLIVLSFGAVFAGYIFSPSFI ESEA-----FW--NGSIAF-NEHL-
... IHSMHEVPLWVKLSASIVMLIGLAIWAYAYIRN-----
... -----TSVPQKAAAQLGPIYRFLFNKWYFDELYNFIFVKPAFWLGRQFWQR-
... GDVGLIDRFGPNGAA-WVVEKGSVLAHKIQSGYLYSYALVMLIGLVAAISWVLV-----
185 >WP_205441185_NuoL_Tsuneonella_flava
186 MHP-----ILLIVFLPLLAIVIGLGN----KALGNLAVKSLTTALLFVSCGLSWPIFIGFLT--
... GAETASVIPVL-QWVHSGSMTFDWALRVDTLTAVMLVVVTTVSALVHLYSWGMYMADEPD-----
... QPRFFAYLSLFTFAMLMMLVTADNLVQMFFGWEGVGLASYLLIGFWFRKPSASAAAIAKAFVNVNRVGD FGFMLGIF
... GTYLVFQTVSI--PEILAAAPGMAGST---
... IGFLGYRVDTMDLLCILLFIGAMGKSAQLGLHTWLPDAMEGPTPVSALHAATMVTAGVFMVCRLSPMFEAAPA
```

```
186... ALMFMFTVGAATCFFAATIGTTQWDIKRVIAYSTCSQLGYMFFAAGVGAYNVAMFHLFTHAFFKALLFLCAGSV
... IHAMHHEQDMRYYGGLRKHIPITFWAMLAGTLAIT--GVGVAGV----
... FGFAGFYSKDAILEAAFARGTNLGNLAFWMGTIAALLTSFYSWRLVFLTFYGGKPRWIESEHIQHSVHKTPAQAG
... EDT-----TGGYHP-----
... HESPLPMLVPLLALSFGAVFAGFVFAPAFVESAE-----FW--QGSVFF--NEGL-
... MHAMHGIPAWAKWSATVAMLIGLAIAFQGYIRD-----
... -----KELPARIAGQLGPVYRFVYNKWFDELYHFLFVKPAFWLGNKFWKW-
... GDIGIIDRFGPNGAA-WLVSQGTAAAKKVQSGYLYSYALVMLIGVVVAISWVMVR-----
187 >WP_120110433_NuoL_Tsuneonella_suprasediminis
188 MHP-----ILLIVFLPLLAIVIGGLGN----KALGNLAVKSLTTAFLFVSCGLSWPIFIGFLT--
... GAETASVIPVL-QWVHSGSMTFDWALRVDTLTAVMLVVTTVSALVHLYSWGMADEPD-----
... QPRFFAYLSLFTFAMLMLVTADNLVQMFFGWEGVGLASYLLIGFWFRKPSASAAAIAKAFVNVNRVGDGFMGLGIF
... GTYLVFQTVSI--PEILAAAPGMAGST---
... IGFLGHRVDTMDLLCILLFIGAMGKSAQLGLHTWLPDAMEGPTPVSALHAATMVTAGVFMVCRLSPMFEAAPA
... ALMFMFTVGAATCFFAATIGTTQWDIKRVIAYSTCSQLGYMFFAAGVGAYNVAMFHLFTHAFFKALLFLCAGSV
... IHAMHHEQDMRYYGGLRKHIPITFWAMLAGTLAIT--GVGLAGV----
... FGFAGFYSKDAILEAAFARGTNLGNLAFWMGTIAALLTSFYSWRLVFLTFYGGKPRWIESEHIQHSVHKTAEQAG
... EDT-----TGGYHP-----
... HESPLPMLVPLLALSFGAVFAGFVFAPAFVESAE-----FW--QGSVFF--NEDL-
... MHAMHGIPAWAKWSATVAMLIGLAIAFQGYIRD-----
... -----KELPARIAGQLGPVYRFVYNKWFDELYHFLFVKPAFWLGNKFWKW-
... GDIGIIDRFGPNGAA-WLVTQGTAAAKKVQSGYLYSYALVMLIGVVVAISWVMVR-----
189 >MXP14217_NuoL_Pseudopontixanthobacter_confluentis
190 MSS-----ILLIIVFLPLLAIVAGLGN----RALGNTVSKSITTGALFISCALSWPIFLGFVA--
... GSAEATVVPVL-QWVQSGDLSFDWALRVDTLTAIMLVVITTVSALVHLYSWGMEEDPD-----
... QPRFFAYLSLFTFAMLMLVTADNLVQMFFGWEGVGLASYLLIGFWFRKPSANAAAIAKAFVNVNRVGDGFMGLGIF
... GTFLVFGTVSI--PEILEAAPSMSGAT---
... IGFLGYRMQTMIDILCILLFIGAMGKSAQLGLHTWLPDAMEGPTPVSALHAATMVTAGVFMVCRLSPMFETAPV
... ALGFVTFIGAATCLFAATVGTTQWDIKRVIAYSTCSQLGYMFFAAGVGAYGAAMFHLFTHAFFKALLFLGAGSV
... IHSMHHEQDMRYYGGLRKKIPLTFFAMLAGTLAIT--GVGIYWLH---
... AGFAGFHSKDAILEVAFARGTELSQFAFWGCFALLTSFYSWRLMFLTFWGKPRWIESEHIQHSVHKTPAEAG
... EDT-----TGGYHP-----
... HESPLSMLVPLGILSIGAVFAGFVFNPQFLDSAE-----FW--AGSIYY--ENL-
... IHAMHAVPLWVKLSATIVMLLGVLIAMMAYIRD-----
... -----TSIPGKFVEQFRNLHNFVYNKWFDELYNLVVRPAFWLGRKFWKI-
... GDEGIIDRFGPNGAA-WLVSKGTVAQAQKVQSGYLYSYALVMLLGLVAAVTWVLM-----
191 >WP_130586631_NuoL_Qipengyuania_flava
192 MHP-----ILLIVFLPLLAALVAGLTN----KAAPSVFAKAITTGALFVSAALSWPIFLGFVA--
... GTYEPTVVPVL-KWVQSGSLSFDWALRVDTLTAIMLVVINTVSALVHLYSWGMDDEDPD-----
... QPRFFAYLSLFTFAMLMLVTADNLVQMFFGWEGVGLASYLLIGFWFRKPSASAAAIAKAFVNVNRVGDGFMGLGIF
... GTYLVFDTVSI--TEILAAAPGMSGAT---
... IGFLGYNVYTMVLCVLLFIGAMGKSAQLGLHTWLPDAMEGPTPVSALHAATMVTAGVFMVCRLSPMFETAPV
... ALGLVTFIGAATCIFAATVGTTQWDIKRVIAYSTCSQLGYMFFAAGVGAYGAAMFHLFTHAFFKALLFLGAGSV
... IHAMHHEQDMRYYGELRKHIPITFWAMMAGTLAIT--GVGIYHLG---
... AGFAGFWSKDAILEVAYGRGTELGNFAFWMGTFALLTSFYSWRLMFLTFWGKPRWIESEHIQHSVHKTPEEAG
... ADT-----TGGYHP-----
... HESPLTMLIPLGVLSIGAVLAGQVFAPTFLDDAA-----FW--GSSIFY--NEPL-
... IHAMHNVPYLVKYAALIVMIGLVVAWYAYIKD-----
```

```
192... -----TSIPAKTAEQLGPIYRFLYNKWFDELYHYLFVVPAPFWLGRQFWKI-  
... GDVGTIDRFGPNGIA-WVVEKGSVGARKFQTGYLYSYALVMLLGLVAAITWVLF-----  
193 >WP_120323177_NuoL_Altererythrobacter_spongiae  
194 MSS-----ILIIIVFLPLLASAIAGLGN----KALGNVPAKVITTTGALFISCALSWPIFLSYLA--  
... GTAEPSVVPVL-MWVQSGDFAFDWALRVDTMTAIMLVVITSVSALVHLYSWG YMDDEPD-----  
... QPRFFAYLCLFTFAMLMLVTADNLVQMFFGWEGVGLASYLLIGFWFRKPSAGAAAIKAFV VNRVGD LGFMLGIF  
... GTFLVFGTVSI--PEILAAAPGMSGAT-----  
... FLGMEFHTMTILTL LLLFIGAMGKSAQLGLHTWLPDAMEGPTPVSAL IHAATMVTAGVFMVCRLSPMFQAAPDTM  
... TFVTLIGGLTCLFAATIGTTQWDIKRVIAYSTCSQLGYMFFAAGVGAYGVAMFHLFTHAFFKALLFLGAGSVIH  
... SMHHEQDMRYYGALRKQIPVTFWAMMAGTLAIT--GVGVYWLH---  
... AGFAGYHSKDAILEAAFASGTEMGRATFWLGAI AALLTSFYSWRLMFLTFWGKPRWSQSEHIQHAVHHGHDEPE  
... EANPARQED-----SGHDVSHHVPSPEEDDGTAGYHP-----  
... HESGWVMLVPLILLSVGA VFAFVSPYFVESES-----FW--QGSIVY-NEHL-  
... MHEMHGIPTWVKLSASIAMLIGLAVAWFAYIKD-----  
... -----TSIPGKFVNQFRQVHAFLYNKWFDELYNLIFVRPAFWLGKVFWKQ-  
... GDVGLIDRFGPNGAA-WVVERGAVVAKKIQSGYLYSYALIMLLGLIAAISWVMVR-----  
195 >WP_170002558_NuoL_Pseudopontixanthobacter_vadosimaris  
196 MSTs----ILIVVFLPLLAIIIGGLGN----RSLGNVAVKAITTTGALFISCGLSWPIFLGFLS--  
... GETIAAVVPVL-DWVRSGDMEFGWALRVDTLTAVMLVVITTVSALVHLYSWG YMDDEPD-----  
... QPRFFAYLSLFTFAMLMLVTADNLVQMFFGWEGVGLASYLLIGFWFRKPSANSAAMKAFIVNRVGD LGFMLGIF  
... GTFLVFGTTSI--PVILEAAPAMSGAS---  
... VGFLGSRVMVMDVLCILLFIGAMGKSAQLGLHTWLPDAMEGPTPVSAL IHAATMVTAGVFMVCRLSPMFETAPV  
... ALAFVTFIGAATCLFAATVGTVQWDIKRVIAYSTCSQLGYMFFAAGVGAYGAAMFHLFTHAFFKALLFLGAGSV  
... IHAMHHEQDMRYYGALRKKIPLTFWAMMAGTLAIT--GVGIYWLH---  
... AGFAGFHSKDAILEAAFGRGTELGFQFAFWLGAFSALLTSFYSWRLMFLTFWGKPRWAQSEHIQHAVHHGHDEPD  
... EANPARQEN-----AGHVAMHDVPSPEQAEGTAGYHP-----  
... HESPVSMLIPLAVLSLGAIFAGWLFSEAF LDSAE-----FW--NGSIYY-NDGL-  
... IHAMHATPLWVKLTATIVMLAGLLIAWFAYIRD-----  
... -----TSIPGKFVEQFGLLHNFLFNKWFDELYDRIFVRPAFWFGRKFWKL-  
... GDEGGIDRFGPDGAA-WLVAQGSAGARRFQSGYLYSYALIMLLGVVAAITWVLM-----  
197 >WP_202391155_NuoL_Pseudopontixanthobacter_sediminis  
198 MP-----LLAAIVGGLGN----RALGNLPVKLITTTGALFVSCALSWPIFLGFIA--  
... GDAQATVVPVL-QWVQSGSLDFDWALRVDTLTAVMLVVITTVSALVHLYSWG YMDDEPD-----  
... QPRFFAYLSLFTFAMLMLVTADNLVQMFFGWEGVGLASYLLIGFWFRKPSANAAA ICAFV VNRVGD LGFMLGIF  
... GTFWVFGTVSI--PEILAAAPAMSGST---  
... IGFLGYRMQTM DILCILLFIGAMGKSAQLGLHTWLPDAMEGPTPVSAL IHAATMVTAGVFMVCRLSPMFETAPI  
... ALGMVTFVGAATCIFAATIGTTQWDIKRVIAYSTCSQLGYMFFAAGVGAYGAAMFHLFTHAFFKALLFLGAGSV  
... IHAMHHEQDMRYYGGLRKRIPLTFFAMLAGTLAIT--GVGIYWLH---  
... AGFAGFHSKDAILEVAFARGTEMGQFAFWMGAF AALLTSFYSWRLMFLTFWGKPRWAESEHIQHAVHHGHDDPE  
... AHNPPVQED-----AGHDAVHAVPSADQGDGTAGYHP-----  
... HESPI SMLVPLGVLT LGAVFAGFIFNPQFLDSAE-----FW--GGSIIY-NENL-  
... IHAMHAVPLWVKLTASIVMLLGLFGAWLAYIRD-----  
... -----TSIPGKFVEQFRLVHRFVYNKWFDELYDLIFVRPAFWFGRKLWKI-  
... GDEGIIDRFGPNGAA-WLV LKGTGA AKRVQSGYLTSYALIMLLGLIAAVTWVLM-----  
199 >WP_176266180_NuoL_Actirhodobacter_atriluteus  
200 MI-----TLIVFLPLLAIIAGFGN----RALGNTLAKSVTTGALS IACALSWPIFLGFLS--  
... GTMEASVVQVL-PWVQSGTLTFDWSLRVDTLTAVMLVVVTTVSALVHLYSWG YMDDEPD-----  
... QPRFFAYLSLFTFAMLMLVTANNLVQMFFGWEGVGLASYLLIGFWFRKPSANAAA ICAFV VNRVGD LGFMLGIF
```

```
200... GTYLVFQTTSI--PEILEAAPMSGAT---  
... IGFLGYRVATMDVLCILLFIGAMGKSAQLGLHTWLPDAMEGPTPVSALHAATMVTAGVFMVCRLSPMFETAPV  
... ALDFVTFIGAATCIFAATVGTTQWDIKRVIAYSTCSQLGYMFFAAGVGAYGAAMFHLFTHAFFKALLFLGAGSV  
... IHAMHHEQDMRYYGALRKEIPFTFWAMLAGTLAIT--GVGVYHLG---  
... VGFAGFWSKDAILEVAYARGTDLGNFAFWMGTFAALLTSFYSWRLMFLTFWGKPRWADSEHIQHAVHHGHDEPE  
... EHNPAIQED-----AGHDVTHTVSPNYSAGTGGYHP-----  
... HESPISMLIPLGVLSLGAFLAGQLFAPAFLDCAA-----FW--NGSIFY-NEPL-  
... IHAMHAVPTLVKYAAFIVMVLGLAAAYLAYIKD-----  
... -----TSLPARGAEQLGPVYRFFYNKWFDELYRMLFIIPAFAFGKAFWRF-  
... VDKGMIDRFPGPDGAA-WIVTKGSAAAKRVQTYVYSYALVMLLGLVAAITWVLF-----  
201 >WP_066965327_NuoL_Rhizorhabdus_dicambivorans  
202 MI-----TLIVFLPLLAIVAGLGN----RLIGNVPAKLVTGALFASCAMSWPVFMGFMT--  
... GELTAHVHPVL-TFIQSGDLSVDWALRVDTLTAVMLVVVTSVSSLVHLYSWGMAEDPS-----  
... QPRFFAYLSLFTFAMLMLVTSDSLQVQMFVWEGVGLASYLLIGFWYHKPSANAAAIKAFVNVNRVGDGFGSLGIF  
... GTFLVFGTVSI--PEILAAAPGYANAS---  
... IGFLGARVDLMTLLCLLLFVGAMGKSAQLGLHTWLPDAMEGPTPVSALHAATMVTAGVFMVCRLSPMFEVSET  
... AMHVVTYVGAATALFAATVGTTQTDIKRVIAYSTCSQLGYMFFAAGVGAYGAAMFHLFTHAFFKALLFLGAGSV  
... IHAMHHEQDMRYYGGLRKHIPFTYWAMMAGTLAIT--GVGIVG-V---  
... AGFAGFHSKDAIIEAAFANGSSSGGVAYAVAVFAALLTSFYSWRLVFLTFYKPRWAGSEHIQHAVHDAHGHDH  
... HDEPAQEDA-----GHDPHAHAHDHGHPAEGDAGYHP-----  
... HESPATMLIPLAVLSVGAIFAGFLWAPYFIDSHHGGA---FW--AGSLAF-DEHL-  
... MHAMHEVPWVVKWSATIVMITGFLIALWAYVLD-----  
... -----RTVPAFTAQFSVLYDFLLRKWFDELYHVLVFPVPAFWLGRFFWKK-  
... GDQGTIDRFPGPNGIA-ALVSGSGAWARRAQTGYLYTYALVMLLGLAAAATWAMVG-----  
203 >WP_183933181_NuoL_Sphingomicrobium_lutaoense  
204 MQT----SIIIVFLPLLAIVAGLGG----RIIGKFASKLVTGALFLSCILSWPIFIGFLT--  
... GAETETVVPVL-DWIRSGDMVVDWALRVDTLTAVMLVVVTTVSSLVHLYSWGMEEDPS-----  
... QPRFFSYLSLFTFAMLMLVTADSLVQMFVWEGVGLASYLLIGFWYHKPSANAAAMKAFVNVNRVGDGFGSLGIF  
... GVFLVFGTVSI--PAILEAAPGAVGTE---  
... IGFAGMRVDLTLCLLLFVGAMGKSAQLGLHTWLPDAMEGPTPVSALHAATMVTAGVFMVCRLSPLFDAAPG  
... ALEVVTYVGAATALFAATVGTQNDIKRVIAYSTCSQLGYMFFAAGVGAYGAAMFHLFTHAFFKALLFLGAGSV  
... IHAMHHEQDMRYYGALRKEIPLTFWAMIFGTLAIT--GVGIIG-  
... IFGGFYSKDAIIESAYAAAVMGGGNVSAGFAFAIALIAALLTSFYSWRLIFLTFYKARWASSEHVQHALHGH  
... EDESEVVADHDSA-----DDHPVAVREGTGGYHP-----  
... HESPWSMLVPLGALTIGAIFAGYAFYYPFFGTEEGAA---FW--AGSLVH-NAEL-  
... VEAHHVPLVWKLSPALVMLIGLGIAYNNYIRK-----  
... -----PKNPAKFVAMFGGLHTFLMHKWFDELYNLI FVKPAMWIGRIFWKR-  
... GDEQTIDRFPGPHGAA-TAVGWGNRLTARLQSGYLYSYALVMLLGLIAAASWAYWWAR-----  
205 >WP_108985294_NuoL_Can.Phycosocius_bacilliformis  
206 ASGLAETLAHVVLAPLLGALICGLFN----RFIGEKVAMFVATALLFVAAACAATIFIGHWN-  
... HSLHLPKPIRLATWIDVGAFKSTWSIRLDAISAVMMIVVTGVSSLVHLYSWGMAEDPH-----  
... KPRFFAYLSLFTFAMLSLVTAADFVQLFFGWEGVGLASYLLIGFWYHKRSANDAQIKAFVNVNRVGDGFGFALGIM  
... AVFFVFGSIEF--KQVFDQIPQKADMM---  
... LAWGVFHLPAIEIIAFLLLFIGAMGKSAQFFLHTWLPDAMEGPTPVSALHAATMVTAGVVLVCLCSPIYEAAPA  
... TAGFITVIGAVTALFAATVGIAQNDIKRVIAYSTCSQLGFMFFAAGIGAYQAAMFHLFTHAFFKALLFLGAGSV  
... IHGMHHEQDMRKMGDVARHMKITFVIMLIGTLAIT--GVGIPHTPFG---  
... FAGFFSKDAIETTFAAMTGNLQAFWMALIAATLTSFYSWRLAFMTFHGTGPKWKADADHGHHDHGHGAGHETS  
... SA--HAAQPAVAHVGEVAHDAAGSHDDHAHHAHWGP-----
```

```
206... HESPLVMLIPLIILAFGAVFAGSIFYDAFVGH-YAKE---FW--
... GNAIYTAPDNNVLKDKYSVPTWVFYAPLVVMLIGLAAALYFYLFN-----
...
... EGLGKKIADRKGLAHAFLENKWFDELYEAVFVKGARALGDLFWKI-GDGKLIIDGLGPNGLIA-
... AALNFGSKKAVKIQSGYVYHYAFMLIAAVALGAFILYR-GA-----
207 >VDC50122_NuoL_Brevundimonas_Caulobacterales
208 MNL--HTLIILGIFAPLLGATVAGLFG----RRIGDIPSQTLTTGLLFFSCAVAWTVF-GQWTW-
... GHLEPFTIRLA-PFINVGDFQSAWSIRIDALSATMLIVVTSVSSLVHLYSWGMYAEDDS-----
... RPRFFAYLSLFTFMMLALVTAADFMQLFFGWEGVGLASYLLIGFWFKKPTASAAAIKAFVVRVGDVDFGFLGII
... TIFWMYGTIEF--AELFPLVATKAGTT----
... WEFLGVQWSALDLAGFLLFIGAMGKSAQFFLHTWLPDAMEGPTPVSALHAATMVTAGVYMLCCLLSPIYIYAPG
... ASQIIAIIIGAITALFAATVGLTQNDIKRVIAYSTCSQLGYMFFAAGVGAYQAAMFHLFTHAFFKALLFLGAGSV
... IHGMHHEQDMRKMGLLWKLIPITYAVMTIGTIAITGLGIPGV-GG-----
... FAGFYKDSIIESAFASSGHSAMFAFSIGLIAAGLTAYYSWRLIFMTFHNKPVW--KEE-GDAHADDHA-
... SHAQLETHSE-----PVSDAHAHDDHAHDDHGHGHLQP-----
... HESPWVMLVPLILLSVGAAGAAGFVFAPHFIGH-HEHE---FW--
... RGAIFTGEHNVHLHESHVPTWVKWSPLILTLTGTAFAFYWIYVAR-----
...
... EGMGRRMAERGGFLYNFLYNKWFDELYDFVVRGFKAVGDVFWKI-VDVKIIDGLGPNGLAA-
... WASLKSARLGKLQSGFVYHYAFVMLLGVAGLLTFAILAWGA-----
209 >WP_004615182_NuoL_Caulobacter_vibrioides
210 MQT----LVTILVFAPLVGALIAGLFG----RRIGDVASQAVTTGLLILACALSWYTF-SQWTW-
... GGLEAFTVRL--PFIHIGDFQANWSIRIDALSATMLIVVTTVSALVHIYSWGMYAEDDS-----
... KPRFFAYLSLFTFAMLSLVTAADFMQLFFGWEGVGLASYLLIGFWFKKPSASAAAIKAFVVRVGDVDFGFLGIM
... TTFWAFGSIQF--AEIFPQIAAHAGKT----
... WVFAGHTFPLMDIACFLLFIGAMGKSAQFFLHTWLPDAMEGPTPVSALHAATMVTAGVYMLCCLLSPMFEYAPI
... AKNIVTVIGAVTALFAATVGLTQNDIKRVIAYSTCSQLGYMFFAAGVGAYQAAMFHLFTHAFFKALLFLGAGSV
... IHGMHHEQDMRKYGALAKLLPITFIAMTIGTIAITGLGIPPLELG-----
... FAGFYKDTIIEAAYAAGQHNPMFAWVIGVLVAGLTSFYSWRLAFFTFNGKARWGHDDH--
... HAHADAHGHDAHADETHDE-----PLPD---DDHGHGHGHDHKP-----
... HESPWVMLFPLVVLISGAVAAGFVFTGYFVGH-HQEE---FW--
... RGAIYNAPTNHVLEAHGVAEWWKYSPLIATILGLLIAAYVYLLKGD-----
...
... ERLGLKLAERKGPLYVFFYNKWFDELYDATFVRLAKFLGDLFWKGGGDQKIIDGLGPDGVS-
... AVSYEVGKRTGKLQTYLYHYAFVMLLGVAGLLTYALFKFH-----
211 >WP_014891219_NuoL_Methylocystis_sp._SC2
212 MI-----YAIVFLPLVGFLIAGALG----PWIGARASELVTTGLLLICAVLSWIVFFDVAL--GHDQ-
... GYAPIIGNWMTVGDLKVDWALRVDTLTAVMLVVNTVSSLVHLYSIGYMHEDP-----
... RPRFFAYLSLFTFAMLMVLTADNLVQMFFGWEGVGLASYLLIGFWYQKPSANAAAIKAFVVRVGDVDFGFLGIF
... LVFQLTKSLGF--EEVFAAVPGLAGKT----
... IHVFGMDVDALTLATFLLFIGAMGKSAQFFLHTWLPDAMEGPTPVSALHAATMVTAGVFMVARLSPIFEYAPA
... TLEFVTLVGAVTAVFAATVGLVQNDIKRVIAYSTCSQLGYMFAEGVGAYSIGVYHLFTHAFFKALLFLGAGSV
... IHAMHHEQDMRNMGLLRKDIPFTFAMMIIGTLALT--GFPF-----
... TAGFYKDAIIEAFAASEHHMFVAVTAAAGLTSFYSWRLVFMFFGARK---DHA-
... VQTDHDKTTAAASAHADGDHA-----HSHDD--GHGHGHGHHTP-----
... HESPVVMLAPLAVLGLGALGAGIVFGKYFIGH-DYDE---FW--
... KGALFTGRDNHIIHEFHDDVALGVGLAPTVMVLGFAVALYFYVLR-----
...
... -----
```



212... PGTAQALARAFPRLYRFLLNKWFDELYDFLFVRPAFALGRFLWKGGGDGAIIDGLGPDGVA-  
... ARVADGARLAVRLQTGYVYHYAFAMLIGVAAVVTYFVAGGLR-----  
213 >WP\_102843351\_NuoL\_Methylocella\_silvestris  
214 MY-----AAILFLPLIGFLIAGPFG----RQLGARPSELVTTSLLFVAALLSWIAFANVAL--GEEP-  
... GSVALLGEWFSSGALRAEWTVRVDSLTAVMLVVVTTVSALVHLYSIGYMSDDPS-----  
... RPRFFSYLSLFTFAMLALVTADNLLQMFFGWEGVGLASYLLIGFWYQKPSANAAAIKAFVNVNRVGDGFGFLLGIF  
... MVFVLTRSINF--EQIFAAAPGLANTT---  
... IHVFGAEWDAMTITCLLLFMGAMGKSAQFLLHTWLPDAMEGPTPVSALIIHAATMVTAGVFMVARLSPLFEQAPH  
... ALSFVIFIGATTAFFAATVGLVQNDIKRVIAYSTCSQLGYMFVALGVGYSIGIFHLFTHAFFKALLFLGAGSV  
... IVAMHHEQDMRNMGGLWRKIPFTFAMMTIGTLALT--GFPY-----  
... TSGYFSKDAIIEAAYASHRPMAYGYLMTVIAAALTSFYSWRLVFLTFFGKAQW-  
... ADEGHGAAAHSVGAAAVAGHAPDAHA-----ADAH---DDHGHGHLNP-----  
... HEAPIVMLIPLAVLAVGALFAGLIFHSDFIGE-GFNE---FW--  
... KGSLFLGPDNHILHEMEEIPHLAALMPTIMMVAGFLIALYMYILA-----  
-----  
... PATPARLAAAMPALYRFLLNKWFDELYDKIFVRPAFWLGNLFWRGGGDGAIIDRLGPDGVA-  
... ARVVDVTGRVVRLQSGYIYHYAFAMLIGLAAIITWYIVGGVR-----  
215 >WP\_102958287\_NuoL\_Mangrovicella\_endophytica  
216 MY-----QAIVLLPLVGFGLIAGLFG----RSIGAKASEYVTSSLLIVA AVL SWIAFISFGF--  
... GEGETLRVTML-RWMQVGS LDIDWSLRIDRLTLVMLVVVNTVSALVHVYSIGYMHHDPH-----  
... RPRFFAYLSLFTFAMLMLVTSNNLVQMFFGWEGVGLASYLLIGFWYKKPSASAAAMKAFIVNRVGDGFGFALGIF  
... GLFVLFGSVNF--  
... DTIFAGAADVAGRMLVFAGYLSMAGALTVICLLLFMGAMGKSAQLGLHTWLPDAMEGPTPVSALIIHAATMVTA  
... GVFMLARMSPVFELSHEALTVVTFVGATTAFFAATVGLVQNDIKRVIAYSTCSQLGYMFVALGVGAYGAAIFHL  
... FTHAFFKALLFLGAGSVIHAVSDEQDMRNMGGLRKHIPITYWMMVIGTLALTG--FPF-----  
... TAGYFSKDAIIESAYAGHNSFAAYGFGMTVIAAALTSFYSWRLIFMTFHGKPR--ASHEVMHHV-----  
-----  
... HESPMVMLVPLFVLAAGALLAGLLFEPYFLGE-GYEE---FW--  
... VSALYSGAENHVLHDMHATPFLIGLLPTIMMVIGLVLAWLFYIRS-----  
-----  
... PQTPARIAERHSGLYKFLLNKWFDELYDVLVRS AKALGRFLWKK-GDVG TIDRLGPDGIS-  
... ARVLDVTDRVVRLQTGYLYHYAFAMLIGVAALVTMMFGGAR-----  
217 >WP\_090676648\_NuoL\_Aureimonas\_jatrophae  
218 MY-----TLIVLLPLIGFLVAGLFG----NAIGAKNSEYVTSGLLIVA AVL SWIAFLIGV---DGVESIKVL  
... ---QWIKAGTLDVSWSLRIDRLTLVMLVVVNTVSALVHVYSIGYMHHDSS-----  
... RPRFFAYLSLFTFAMLTLVTADNLVQMFFGWEGVGLASYLLIGFWYQKPSANAAAMKAFVNVNRVGDGFGFALGIF  
... GLFVVFGSVNL--  
... TDIFAGAGQMAQQLQFAGYLSASGAMTAICLLLFMGAMGKSAQIGLHTWLPDAMEGPTPVSALIIHAATMVTA  
... GVFMLARMSPVFELSHSALTFVTFIGATTAFFAATVGLVQNDIKRVIAYSTCSQLGYMFVALGVGAYGAAVFHL  
... FTHAFFKALLFLGAGSVIHAVDGEQDMRHMGGGLRKHIPVITYWTMMIGTLALTG--FPF-----  
... TAGYYSKDAIIESAFAGENAFAMYGYIMTVIAAALTSFYSWRLVFLTFFHGKPR--ASHEVMHHV-----  
-----  
... HESPVMLVPLYILSAGALLAGIVFYPPFLGG--SYDT---FW--  
... NGALFSGPQNHILHESHEVPGLVVWSPTIAMALGFIVAYIFYVRS-----  
-----  
... PEKPAQLAARNSGLYQFLLNKWFDELYDFLFVRS AKWLGRFLWKK-GDGAVIDRLGPDGVS-  
... ARVLDVTNRVQLQTGYLYHYAFVMLIGVAALVTMMFGGMR-----  
219 >WP\_090959385\_NuoL\_Aureimonas\_phyllosphaerae

```
220 MY-----TLIVLLPLVGFIVAGLFG----NRIGAKASEYVTSGLLIAAALLSWIGFLSFGG-----
... ETQHVVQL-QWMKAGTLDISWQLRIDRLTLVMLVVVNTVSALVHVYSIGYMHDDSDS-----
... RPRFFAYLSLFTFAMLTTLVTADNLVQMFFGWEGVGLASYLLIGFWYQKPSANAAAMKAFVNVRVGDFGFLGIF
... GLFMVFGSANL--
... DTIFAGAGQMVGTILNFAGYSLPAAGAMTAICLLL FMGAMGKSAQIGLHTWLPDAMEGPTPVSAIHAATMVTA
... GVFM LARLSPVFELSHSALTFVTFIGATTAFFAATIGLVQNDIKRVIAYSTCSQLGYMFVALGVGAYGAAIFHL
... FTHAFFKALLFLGAGSVIHAVDGEQDMRHMGGRLRKHIPITYWTMMIGTLALTG--FPF-----
... TAGYYSKDAIIESAFAGENAFAMYGYMMTVIAAALTSFYSWRLVFLTFHKGPR--ASHEVMHHV-----
... -----
... HESPLVMTTPLFILSAGALLAGIVFYPPFLGG--SYET---FW--
... HTALFAGPENHILHEAHEVPALVWSPTIAMVLGFVVAYIFYIRQ-----
... -----
... PQRPAQVAARNPSLYKFLLNKWFDELYDVL FVRSKWLGRFLWKK-GDVAVIDRLGPDGIS-
... ARALDVTGWVRLQTGYLYHYAFVMLIGVAALVTFMMFGGMR-----
221 >MBB4001705_NuoL_Aurantimonas_endophytica
222 MY-----QIIVLLPLAGFLVAGLFG----NAIGAKAAEYITSAFLIVAAALSWFAFITFGF--
... GEGETLRVTLL-TWMQSGGLDIAWSLRIDRLTLVMLVVVNTVSALVHVYSIGYMHDDPH-----
... RPRFFAYLSLFTFAMLMVTSNNLVQMFFGWEGVGLASYLLIGFWYKKPSANAAAMKAFIVNVRVGDFGFILGIF
... GVVVLFGSVNL--
... DTIFAGAADLMAQMLSFAGYALGMGAALTTVCLLL FMGAMGKSAQLGLHTWLPDAMEGPTPVSAIHAATMVTA
... GVFLVARMSPLFELSHTALTVVTFVGATTAIFAATVGLVQNDIKRVIAYSTCSQLGYMFVALGVGAYSVAIFHL
... FTHAFFKALLFLGAGSVIHAVSDEQDMRRMGGLRKHIPKTYWMMVIGTLALTG--FPY-----
... TAGYFSKDAVIEAAFVGHNSMAMYGWGLTVLAALLTSFYSWRLIFMTFHKGPR--ASADVMHHI-----
... -----
... HESPPVMLVPLYVLA VGALLAGIVFADFFIDG-GYDA---FW--
... RSALFTGPENHVLHDMHEIPFAIVFLPTVMMALGFVLAWLFYIRS-----
... -----
... PERPRQLAERHHGLYRFLLNKWFDELYNFLFVRPAIAFGRILWRV-GDGRIIDGLGPDGVS-
... ARVLDVTNRVRLQTGYLYHYAFAMLIGVAALVTWTMLGGAN-----
223 >NDV85086_NuoL_Aurantimonas_aggregata
224 MY-----QIIVLLPLAGFLVAGLFG----NAIGAKEAEYITSAFLVVAALSWFAFVTFGF--
... GNGETLRVTLL-TWISGGLDISWSLRIDRLTLVMLVVVNTVSALVHIYSIGYMHDDPH-----
... RPRFFAYLSLFTFAMLMVTSNNLVQMFFGWEGVGLASYLLIGFWYKKPSANAAAMKAFIVNVRVGDFGFILGIF
... GIYVLFGSVNL--
... DTIFAGAADLMAQMLSFAGYSLGMGAALTTVCLLL FMGAMGKSAQLGLHTWLPDAMEGPTPVSAIHAATMVTA
... GVFLVARMSPLFELSHTALTVVTFVGATTAIFAATVGLVQNDIKRVIAYSTCSQLGYMFVALGVGAYSVAIFHL
... FTHAFFKALLFLGAGSVIHAVSDEQDMRRMGGLRKHIPKTYWMMVIGTLALTG--FPY-----
... TAGYFSKDAVIEAAFVGHNSFAMYGWALTVLAALLTSFYSWRLIFMTFHKGPR--ASADVMHHI-----
... -----
... HESPPVMLVPLYVLAIGALLAGIVFADSFIDG-GYDA---FW--
... RSALFTGPENHVLHDMHEIPFAIVFLPTVMMALGFALAWLFYIRF-----
... -----
... PEQPRRLAERHRGLYQFLLNKWFDELYNFLFVRPAIALGRMLWKT-GDGRIIDGLGPDGVS-
... ARVLGVTNHVRLQTGYLYHYAFAMLIGVAALVTWMLGGVN-----
225 >NDW06534_NuoL_Jiella_pacifica
226 MY-----TIIIVLLPLAGFLIAGLFG----KSIKAKACEYTLSGFMVVAAILSWIAFISFGF--
... GEGETLRVPLL-QWMQSGTLDVAWSLRIDRLTLVMLVVVNTVSSLVHVYSIGYMHDDPH-----
... RARFFAYLSLFTFAMLMVTSNNLVQMFFGWEGVGLASYLLIGFWYKKPSANAAAMKAFVNVRVGDFGFALGIF
```

```
226... GVFALFGSVNL--
... DTIFAGAADVAGSLMNFAGYALTMGSALTVVCLLLFMGAMGKSAQIGLHTWLPDAMEGPTPVSALIHAATMVTA
... GVFMLARMSPLFELSSTALTFVTFIGATTAFFAATIGLVQNDIKRVIAYSTCSQLGYMFVALGVGAYGPAIFHL
... FTHAFFKALLFLGAGSVIHAVSDEQDMRRMGGLRKHIPKTYWMMVIGTLALTG--FPF-----
... TAGYYSKDAIIEAAFVGHNSFALYGWGMTVIAAALTSFYSWRLIFLTFHGKPR--ASADVMHHI-----
-----
... HESPWMLVPLFVLAAGALFAGILFEGAFIGE--GYGE---FW--
... HAALFTGSDNHVLHDMHEISFWIAFLPTLCMVVGFVTAYFFYIAR-----
-----
... PSLAKQTADRNRGLYQFLLNKWYFDELYDFLFVQPAQRVGRFLWRT--GDGKVIDGFGPDGVS--
... ARVMDVTGRVVKLQSGLYHYAFAMLIGVAALVTWMLGGAS-----
227 >WP_08440924_NuoL_Fulvimarina_manganoxydans
228 MY-----QIIVLLPLAGFLIAGLAG----KAIGAKASEYTTSSFLVIAAVLSWIGFLSFGW--
... GEGETIRVQML-QWMQSGGLDVSWSLRIDRLTLIMLVVNTVSALVHIYSIGYMHDPH-----
... RPRFFAYLSLFTFAMLMLVTSNNLVQMFFGWEGVGLASYLLIGFWYKKPSANAAAMKAFVNVRVGDFGFILGIF
... GVFVLFQSVNL--
... DTIFAGAADIAATMLNFAGYALTMGGALTAVCLLMFVGAMGKSAQIGLHTWLPDAMEGPTPVSALIHAATMVTA
... GVFMVARMSPVFELSHTALTFITFIGATTAFFAATIGLVQNDIKRVIAYSTCSQLGYMFVALGVGAYSVAIFHL
... FTHAFFKALLFLGAGSVIHSVSDEQDMRRMGGLRKHIPITYWTMVIIGTLALTG--FPF-----
... TAGYFSKDAIIEAAFVGHNAFATYGWGMTVIAALLTSFYSWRLIFMTFHGKPR--ASADVMHHV-----
-----
... HESPMVMLVPLFVLSAGALLAGILFEHSFVGE--GYEH---FW--
... HAALFTGAENHVLHDMHEVAFGIAILPTVMMALGFVVAYWMYVKD-----
-----
... KAAPKRLAETHRGLYRFFLNKWYFDELYNVLVFRPAMAVGRTLWKT--GDGRIIDGLGPDGVS--
... ARVVDVTNRVVRLQTGYLYHYAFAMLIGVAALVTWMLGGAN-----
229 >WP_007065974_NuoL_Fulvimarina_pelagi
230 MY-----QIIVLLPLAGFLIAGLAG----NTIGAKASEYITSSFLVVAAILSWIGFLTFDA---
... DEPMAPITML-QWMQSGGLDVAWALKIDRLTLVMLVVVNTVSALVHIYSIGYMHDPH-----
... RPRFFAYLSLFTFAMLMLVTADNLVQMFFGWEGVGLASYLLIGFWYKKPSANAAAMKAFIVNVRVGDFGFILGIF
... GVFAIFQSVNL--
... DTIFAGAADVASRMLNFAGYSLTMGGAITCVCLLLLLGAMGKSAQLGLHTWLPDAMEGPTPVSALIHAATMVTA
... GVFMLARMSPIFELSHTALTVVTFVGASTAIFAATVGLVQNDIKRVIAYSTCSQLGYMFVALGVGAYSVAIFHL
... FTHAFFKALLFLGAGSVIHAVSDEQDMRRMGGLRKHIPVITYWTMIIGTLALTG--FPF-----
... TAGYFSKDAVIEAAYVGHNAFALYGWGLTVIAALLTSFYSWRLIFLTFHGKPR--ASADVMHHV-----
-----
... HESPSVMIVPLFFLAAGAILAGLLFEHEFVGD--AYEH---FW--
... GASLFTSAENHVLHDLHEVAFGVAIIPTVMMAVGFALAYFFYIAN-----
-----
... PAMPKQLSQTHRGLYKFFLNKWYFDELYDFLFVRSSKWIGRTLWKT--GDGRIIDGLGPDGVS--
... ARVIDVTNRVVKLQTGYLYHYAFAMLIGVAALVTWMMIGGIS-----
231 >WP_116682147_NuoL_Fulvimarina_endophytica
232 MY-----QIIVLLPLAGFLIAGLGG----NMIGAKASEYVTSSFLVVAALLSWIGFLSFDA---
... AEPMAPITLL-HWMQSGDFDVSWALKIDRLTLVMLVVVNTVSALVHIYSMGYMHDPH-----
... RPRFFAYLSLFTFAMLMLVTADNLIQMFFGWEGVGLASYLLIGFWYKKPSANAAAMKAFVNVRVGDFGFLLGIF
... GVFVLFQSVNL--
... DTIFAGAADIAAQMLSFAGYSLTMGSALTVVCLLLFVGAMGKSAQIGLHTWLPDAMEGPTPVSALIHAATMVTA
... GVFMVARMSPIFELSHTALTFITFIGATTAFFAATIGLVQNDIKRVIAYSTCSQLGYMFVAIGVGAYSVAIFHL
```

```
232... FTHAFFKALLFLCAGSVIHSVSDEQDMRRMGGLRKHIPVTYWTMVIIGTLALTG--FPF-----  
... TAGYFSKDAVIEAAAFVGHNAFAGYGWGLTVIAALLTSFYSWRLIFMTFHGKPR--ASADVMHHV-----  
... -----  
... HESPMVMLVPLFILSIGALFAGMMFEHSFVGE--GYEH---FW--  
... QAALYMGPDNHILHDLHEVAFGIAIIPITIMMALGFVIAYWLYIVN-----  
... -----  
... PAKPKQLSETHRGLYKFFLNKWFDELYDFLFVRPAKALGRTLWKT--GDGRIIDGLGPDGVS--  
... ARVLDVTNRVRLQTGYLYHYAFAMLIGVAALVTWMMIGGIS-----  
233 >WP_029057157_NuoL_Stappia_stellulata  
234 MY-----QAIVFLPLVGFLVAGLFG----RSIGAKASEYITSGLLIVAALLSWVAFFSIGF--  
... GETPVVRELL--RWMTSGTFSVDWTIRVDLTAVMLVVNSVSALVHVYSIGYMHDDPH-----  
... RPRFFAYLSLFTFAMLMLVTSNLLQMFFGWEGVGLASYLLIGFWYKKPSANAAAMKAFVNVNRVGDGFGFILGIL  
... GVFYLFNSTDY--  
... DTIFANAQFAATVLTFLGAELSQDAALTVVCLLLFMGAMGKSAQFLLHTWLPDAMEGPTPVSALIIHAATMVTA  
... GVFMVARLSPIFELSHTAMTVVTLFGATTAFFAATVGLVQNDIKRVIAYSTCSQLGYMFVALGVGYSIAIFHL  
... FTHAFFKALLFLGAGSVIHAVSNEQDMRKMGGGLRKHIPITYWMMVIIGTLALTG--FPL-----  
... TAGFFSKDAVIEAAYVGHNAFAQYAFWLVAAAALTSFYSWRLAFMTFHGKPR--ASVDVMKHV-----  
... -----  
... HESPLVMTVPLMILAAGALLAGFVFKGVFIGD--GYDA---FW--  
... KGALFVSEENHVLHDIHEVPLVWKASPFVMMMLGGFAVAMFYIRS-----  
... -----  
... PEIPRQLAERHDGLYRFLLNKWFDELYDVIFVRPAMWIGRQLWKK--GDGVVIDGMGPDGVA--  
... ARVQNVTTWVRLQTGYLYHYAFAMLIGVAALITWSMFSVGGAH-----  
235 >WP_107989924_NuoL_Breoghania_corrubedonensis  
236 MY-----TAIVLLPLLGLVAGIFG----RVIGAKASEYITSGLLIIAAILSWVAFISVGL--  
... GDGETQIIPIA--TWIVSGALDVQWAIKVDLTAVMLVVNTVSALVHVYSIGYMHDDPH-----  
... KSRFFAYLSLFTFAMLTLVTSNLLVQMFFGWEGVGLASYLLIGFWYQRPSANAAAMKAFVNVNRIGDGFALGIF  
... GVYYLFDVNL--  
... ATIFANAQGFVESVLTFLGTPYEPATAMTVVCLLLFMGAMGKSAQFLLHTWLPDAMEGPTPVSALIIHAATMVTA  
... GVFMVARLSPLFELSHTALTFVTFIGATTAFFAATIGLVQTDIKRVIAYSTCSQLGYMFVALGVGAYGVGFVHL  
... FTHAFFKALLFLGAGSVIHAVSDEQDMRKMGGGLRKHIPITYWMMIVIGTLALTG--FPL-----  
... TAGYFSKDAIIEAAAFVGDNAFAQYGFWMTVIAALMTSFYSWRLIFLTFHGKPR--ASVDVMKHV-----  
... -----  
... HESPPVMTVPLMVLALGALVAGFVFSGSFIGH--HQGE---FW--  
... KTALFMSADNHVLEEMHHVPQVWKWSPFVMMVIGLVVAWYFYIKA-----  
... -----  
... PDAPKRLAARHDGLYKFLLNKWFDELYDFLFVRPAMKLGRFLWKR--GDGTVIDGFGPDGIS--  
... TLVQDVTARVRLQTGYIYHYAFAMLIGVALLVTWTFAGGGAH-----  
237 >WP_136353129_NuoL_Mesorhizobium_compostii  
238 MY-----QAIVFLPLIGFLVVGLFG----NSLGAKASEFITSGLLVISAVLSWVAFFTVAF--  
... GDGEVFTVPVL--RWIQSGGIDTSWALRIDLTAVMLVVNTVSSLVHIYSIGYMHDDPN-----  
... RPRFFAYLSLFTFAMLMLVTADNLIQMFFGWEGVGLASYLLIGFWYKKPSANAAAIAKAFVNVNRVGDGFGFILGIF  
... GVFVLFVSVNL--  
... TTIFANAASYLPAVLTFLGYALDKGAAMTVVCLLLFMGAMGKSAQVPLHTWLPDAMEGPTPVSALIIHAATMVTA  
... GVFMVARLSPLFELSHTALTVVTFIGAITAFFAATVGLVQNDIKRVIAYSTCSQLGYMFVALGVGAYGAAIFHL  
... FTHAFFKALLFLGSGSVIHAMSDEQDMRKMGGIRKLIPNTYWMMVIIGTLALTGVGIPMTLVG-----  
... FAGFFSKDAIIEASVGENAVATFAFVLLVIGAAFTSFYSWRLIFMTFHGEP--ASHEVMHHV-----  
... -----
```

```
238... HESPPVMLVPLYVLAAGAI FAGVLFSTYFVGE--GYEH---FW--  
... KAALFTGPDNHVLHEMHGVPLWVKLAPIVVTVLGFLVAWQFYIRK-----  
... -----  
... PALPAEVAGRHRGLYAFLLNKWYFDEVYDFLFVRFKWLGYTLWKK--GDGAVIDGLGPDGVS--  
... ARVIDVTNRVVKLQTGYLYHYAFAMLIGVAALVTWML-----  
239 >WP_035023849_NuoL_Aquamicrobium_defluvi  
240 MY-----QAI VFLPLIGFLIVGLFG----TSLGAKASEYITSGLVVSAALSWIAFFSVGF--  
... SDAETFTVPLL--RWLQTGGLDAAWALRIDTLTVVMLVVVNTVSALVHIYSIGYMHHDPH-----  
... RPRFFAYLSLFTFAMLMLVTSNLDVQMFEGWGLASYLLIGFWYKKPSASAAAMKAFIVNRVGDGFLGLF  
... GVFLVFGSVNF--  
... STIFAGAATYLPVLTFLGYSIDRTAAITVVCLLLFMGAMGKSAQVPLHTWLPDAMEGPTPVSALIHAATMVTA  
... GVFMARLSPLFELSHSALTVVTFIGATTAFFAATVGLVQNDIKRVIAYSTCSQLGYMFVALGVGAYGAAIFHL  
... FTHAFFKALLFLGSGSVIHAMSDEQDMRKMGGIRKLIPTTYWMMIIGTVALTGLGIPATVIG-----  
... TAGFFSKDAIIESAFVGHNAVAGFAFALLVIAACFTSFYSWRLIFMTFHGKSR--ASEEVLHHV-----  
... -----  
... HESPPVMLVPLYILAVGALFAGFVFHDQFIGD--AYEA---FW--  
... KTALFTSADNHVLHDMHNVP MWVKMSPFVAMVVGFLLSYQFYIRS-----  
... -----  
... PETPKRLAAQHRGLYQFLLNKWYFDELYDFLFVRS AKALGRFLWKT--GDGKIIDGLGPDGVS--  
... ARVVDVTQRVRLQSGYLYHYAFAMLIGVAALATWML-----  
241 >WP_183830913_NuoL_Aquamicrobium_lusatiense  
242 MY-----QAI VFLPLIGFLIVGLFG----NAIGARASEYLTSGLMVIVAALSWVAFFTVGF--  
... SETETFTVPLL--RWLQSGGLDADWALRIDTLTVVMLVVVNTVSALVHIYSIGYMHHDPH-----  
... RPRFFAYLSLFTFAMLMLVTSNLDVQMFEGWGLASYLLIGFWYKKPSASAAAMKAFIVNRVGDGFLGLF  
... GVFLVFGSVNF--  
... STIFASTANYLPVLTFLGYSIDKTAAMTIVCLLLFMGAMGKSAQVPLHTWLPDAMEGPTPVSALIHAATMVTA  
... GVFMARLSPLFELSHSALTVVTFIGATTAFFAATVGLVQNDIKRVIAYSTCSQLGYMFVALGVGAYGAAV FHL  
... FTHAFFKALLFLGSGSVIHAMSDEQDMRKMGGIRKLIPTTYWMMIIGTIALTGLGIPATVIG-----  
... TAGFFSKDAIIESAFVGHNAVAGYAFALLVIAACFTSFYSWRLIFMTFHGKSR--ASEDVLHHV-----  
... -----  
... HESPPVMLVPLYILAVGALFAGFVFHDQFIGE--AYEA---FW--  
... KTALFTSADNHVLHEMHNVPMWVKMSPFVAMVVGFLLSYQFYIRS-----  
... -----  
... PETPKRLAAQHRGLYQFLLNKWYFDELYDFLFVRS AKAI GRFLWKT--GDGKIIDGLGPDGIS--  
... ARVVDVTQRVVKLQSGYLYHYAFAMLIGVAALATWML-----  
243 >WP_013894820_NuoL_Mesorhizobium_opportun  
244 MY-----QAI VFLPLLGLIVGLFG----TSLGAKASEYITSGFLVISALLSWVAFFSVGF--  
... GHGEVFTVPVL--HWIQSGGLDVSWALRIDTLTVVMLVVVNTVSALVHIYSIGYMHHDPN-----  
... RPRFFAYLSLFTFAMLMLVTADNLDVQMFEGWGLASYLLIGFWYKKPSANAAA IAFVNRVGDGFGFALGIF  
... GVFLVFGSVNL--  
... GTIFANAATFVPAVLTFLGHALDKQAAMTIVCLLLFMGAMGKSAQVPLHTWLPDAMEGPTPVSALIHAATMVTA  
... GVFMARLSPLFELSHSALTVVTFIGAFTAFFAATVGLVQNDIKRVIAYSTCSQLGYMFVALGVGAYGAAIFHL  
... FTHAFFKALLFLGSGSVIHAVSDEQDMRKMGGRLKIPATYWMMVIGTLALTGVGIPVTVIG-----  
... TAGFFSKDAI IETAFASHNSVAGLAFVLLVIAAGFTSFYSWRLIFMTFHGKPR--ASHEVMHHV-----  
... -----  
... HESPPVMLVPLFILAAGALFAGIIFHNSFIGE--GYAE---FW--  
... KASLFTLPDNHILHEIHELPLWVELSPFIAMLVGLALAWKFYIRS-----  
... -----
```

```
244... PEMPVNLAHQHRLYAFLLNKWYFDELYDFLFVRPAKRLGSFLWKT-GDGTIIDGLGPDGIS-
... ARVVDVTNRVVKLQTGYLYHYAFAMLIGVAAFVTWML-----
245 >WP_192362998_NuoL_Mesorhizobium_mediterraneum
246 MY-----QAIVFLPLLGLIIVGLFG----TSLGAKASEYITSGLLVISAVLSWVALFAVGF--
... GEGEVFTVPVM-RWISQSGGLEAAWALRIDTLTVVMLVVNTVSALVHIYSIGYMHDPN-----
... RPRFFAYLSLFTFAMLMLVTADNLVQMYFGWEGVGLASYLLIGFWYKKPSANAAAIKAFVVRIGDFGFALGIF
... GVFLVFGSVNL--
... GTIFANAATFIPAVLTFLGYALDKQAAMTVVCLLLFMGAMGKSAQVPLHTWLPDAMEGPTPVSALIIHAATMVTA
... GVFMARLSPIFELSHSALIVVTFVGAFTAFFAATVGLVQNDIKRVIAYSTCSQLGYMFVALGFGYAAIFHL
... FTHAFFKALLFLGSGSVIHAVSDEQDMRKMGGRLTLIPKTYWMMVIGTLALTGVGIPVTVIG-----
... TAGFFSKDAIIESAFAAHNPVAGLAFVLLVVAACFTSFYSWRLIFMTFHGQPR--ASHEVMHHV-----
... -----
... HESPPVMLVPLFILAAGSLFAGVIFHGAFIGE-GYAE---FW--
... KASLFTLPENHILHDIHEVPLWVKLAPFVAMLIGFAIAWQFYIRA-----
... -----
... PEMPKNLAAHQHRLYAFLLNKWYFDELYDLLFVRPAKRLGHFLWKT-GDGTVIDGLGPDGVS-
... ARVVDVTNRVVKLQTGYLYHYAFAMLIGVAALVTWML-----
247 >WP_047144650_NuoL_Aquamicrobium_sp._LC103
248 MY-----HAIVFLPLLGLIAGLFG----RAIGAKASEYVTSGFLVISAILSWVAFFTVAL--
... GETEFTVPVL-RFIQAGGLDVSWALRIDTLTAVMLVVNTVSALVHIYSIGYMHDPH-----
... RPRFFAYLSLFTFAMLMLVTSNLIQMFVWEGVGLASYLLIGFWYKKPSANAAAIKAFVVRVGDGFGFLGLF
... GVFLVFGSVNF--
... DTIFANAAMIPAVFNFLGYALNNQTALTVICLLLFMGAMGKSAQVPLHTWLPDAMEGPTPVSALIIHAATMVTA
... GVFMARLSPIFELSHSALLVVTFVGAFTAFFAATVGLVQNDIKRVIAYSTCSQLGYMFVALGLGFYSAAIFHL
... FTHAFFKALLFLGSGSVIHAVSDEQDMRKMGGRLKLIPTTYWMMVIGTIALTGVIPTIIG-----
... TAGFFSKDAIIEGAFVGHNALATFAFILLTIAAVFTSFYSWRLIFMTFHGRPR--ASADVMHHV-----
... -----
... HESPPVMLVPLFILAVGALFAGLVFHDWFIGH-HYDE---FW--
... KGALFTLPDNHILHEFHDVPMWVKLAPFLAMLIGFFVAYQFYIRS-----
... -----
... PETPKQLAAQHEGLYRFLNKWYFDELYDFLFVRPAMRLGRFLWKK-GDGAIIDGLGPDGIS-
... ARVVDVTQRVVKLQTGYLYHYAFAMLIGVAALVTWMLGSSF-----
249 >WP_009450014_NuoL_Nitratireductor_indicus
250 MY-----HAIVFLPLVGLIAGLFG----RSIGAKASEYITSGLMVIAALLSWVAFFSVAM--
... GSGEFTVPVL-RFITSGSLDMSWALRIDTLTVVMLIVVNTVSALVHIYSIGYMHDPH-----
... RPRFFAYLSLFTFAMLMLVTSNLIQMFVWEGVGLASYLLIGFWFKPSANAAAMKAFVVRVGDGFGFLGLIF
... GLFMVFGSVNF--
... STIFANAATYLPVAVLTFLGYALDKGAALTVICLLLFMGAMGKSAQVPLHTWLPDAMEGPTPVSALIIHAATMVTA
... GVFMVARLSPIFELSHSALTAVVTFVGAFTAFFAATVGLVQNDIKRVIAYSTCSQLGYMFVALGTGFYAAIFHL
... FTHAFFKALLFLGSGSVIHAVSDEQDMRKMGGRLKLIPTTYWMMVIGTIALTGVIPLTVIG-----
... TAGFFSKDAIIEGVFAGENYFSGFAFVLLTVAAVFTSFYSWRLIFMTFHGKPR--ASADVMHHV-----
... -----
... HESPLVMLVPLFILAAGALFAGVAFKEFFIGH-DYEH---FW--
... KAALFTLPENHILEEFHHVPLWVKLAPFVAMLLGLYVAVVYFYIRS-----
... -----
... PERPKALARRFSGLYAFLLNKWYFDEAYDFLFVRPAKRLGHFLWKK-GDGIVIDGLGPDGIS-
... ARVVDVTNRIVKLQSGYLYHYAFAMLIGVAALVTWMLGGTF-----
251 >WP_206554529_NuoL_Nitratireductor_aquibiodomus
```

```
252 MY-----QAI VFLPLIGFLIAGLFG----RSIGAKASELITSGLMVITALLSWVAFFSVAL--
... GSGEFTVPLL-SFITSGNLDVSWAIRVDTLTAVMLIVVNTVSALVHIYSIGYMHHDPH-----
... RPRFFAYLSLFTFAMLMLVTS DNLVQMFFGWEGVGLASYLLIGFWFKKPSANAAAMKAFV VNRVGD FGFLLGIF
... GIYMLFGSVNF--
... STIFANAATYLP AVLTF LGYALDKG GALTAVCLLLFMGAMGKSAQVPLHTWLPDAMEGPTPV SALIHAATMVTA
... GVFMVARLSPVFELSHTALT VVTFVGAFTAFFAATVGLVQNDIKRVIAYSTCSQLGYMFVALGTGFYSAAIFHL
... FTHAFFKALLFLGSGSVIHAVSDEQDMRKMGLRKLIPQTYWMMIIGTIALTG VGIPMTVIG-----
... TAGFFSKDAIIEGAFAGQNYFAMFAFVMLTIAAVFTSFYSWRLIFMTFHGKPR--ASADVM SHV-----
... -----
... HESPLVMLVPLFILAVGALFAGVAFKGFFIGD-AYDQ---FW--
... KGALFTLPGNHMLEEFHHVPVWVKLAPFVAMLLGLYVAWVYYIRS-----
... -----
... PERPKRLAKQFSGLYAFLLNKWFDELYDFLFVRPAMRLGRFLWKK-GDGAVIDGLGPDGIS-
... ARVVDVTNRIVKLQSGYLYHYAFAMLIGVAALVTWMLLGGTF-----
253 >WP_209336310_NuoL_Tianweitania_sediminis
254 MY-----QAI VFLPLIGFLVAGLFG----RSIGAKASEYVTTGLLIVSAVLSWIAFFSVAL--
... GHGEPFTVPIL-RWIVQGGVDVAWSLRIDTLTAVMLIVVNTVSALVHVYSIGYMHHDPH-----
... RPRFFAYLSLFTFAMLMLVTS DNLIQMFFGWEGVGLASYLLIGFWYKKPSASAAAMKAFIVNRVGD FGFALGIF
... GVFLVFGSVNF--
... DTIFANAATFIPAALNFLGYALS NQAALTVVCLLLFMGAMGKSAQVPLHTWLPDAMEGPTPV SALIHAATMVTA
... GVFM LARLSPIFEHSHTALT VVTFIGATTIFAATVGLVQNDIKRVIAYSTCSQLGYMFVALGTGFYSAAIFHL
... FTHAFFKALLFLGSGSVIHAVSDEQDMRKMGLRKLIPPTYWMMVIGTIALTG VGIPPTILG-----
... TAGFFSKDAIIEGAFAAHNP MAGYAFVLLVLA AVFTSFYSWRLIFMTFHGTPR--ASADVMH HV-----
... -----
... HESPPVMLVPLYILAAGALFAGVIFHDFFIGH-IEEYNE-FW--
... KGALFTLPENEILDHFHHVPLWVKLSPLVAMVIGFALAYQFYIRS-----
... -----
... PETPQRLAAQHQLYKFLLNKWFDELYDFLFVRPAMRLGHFLWKQ-GDGRVIDGLGPDGIA-
... ARVADVTRGVVRLQTGYLYHYAFVMLIGVAALVTWMLLGNTF-----
255 >WP_114442382_NuoL_Phyllobacterium_salinisoli
256 MLY-----YAI VFLPLAGFLAAGLLG----KQLGVKACEYITSGFLVIAAALS WVAFFQVAL--
... GHGETLRIPVM-HWVTSGLSFDWAFRIDTLTAVMLVVVNTVSALVHIYSIGYMHHDPH-----
... RPRFFAYLSLFTFAMLMLVTS DNLVQMFFGWEGVGLASYLLIGFWFKKPSANAASMKAFIVNRVGD FGFLLGIF
... GVFLFN SVSY--
... DTIFAAAANYLPA AVHFLGYS LDRQGAITVVCLLLFMGAMGKSAQFLHTWLPDAMEGPTPV SALIHAATMVTA
... GVFMVARMSPLFELSQTALT VVTIIGATTAFFAATVGLVQNDIKRVIAYSTCSQLGYMFVALGVGAYGAGVFHL
... FTHAFFKALLFLGAGSVIHAVSDEQDMRRMGGLRKLIPPTYWMMIIGTVALTGLGIPGTSIG-----
... TAGFFSKDAIIESSYASHGPAAGYAFVMLTVAALFTSFYSWRLIFMTFHGKPR--ATADVMH HV-----
... -----
... HESPPVMLVPLFVLGAGALIAGFLFHDYFFGH-HYVE---FW--
... KGALFTGPHNEILEEYHHVPFLVKIAPFLAMAVGFVIAWIFYIRS-----
... -----
... PEMPQQLARRHPGLYQFLLNKWFDELYNFLVVRPTLALGRILWKG-GDGWLDIDGFDPDGIS-
... ARVVDVTNRVVKLQTGYLYHYAFAMLIGVAALVTWMLLGS SF-----
257 >WP_147835202_NuoL_Phyllobacterium_endophyticum
258 ML-----LAI VFLPLLGLIAGLFG----SSIGAKASEYITTGLLIICAVLSWIAFGTVAL--
... GHAEAFKVPVM-RWVESGSLSFDWSLRIDTLTAVMLVVVNTVSALVHTYSIGYMHHDPN-----
... RPRFFAYLSLFTFAMLMLVTGDNLVQMFFGWEGVGLASYLLIGFWFKKPSANAAAMKAFIVNRVGD FGFLLGIF
```

```
258... ALFVLFDTVQF--
... DTLFAAAREYLPVAVLNFLGYALDKQGAIITITCLLLFMGAMGKSAQFLLHTWLPDAMEGPTPVSALIHAATMVTA
... GVFMVARLSPIFELSHTALIFVTFIGATTAFFAATIGLVQNDIKRVIAYSTCSQLGYMFVALGLGAYGAGIFHL
... FTHAFFKALLFLGAGSVIHAVSDEQDMRHMGGLRTFIPKTYWMMIVGTVALTGLGIPGTVIG-----
... TAGFFSKDMIIESAFASHSPMASYAFILLVVAIIFTSFYSWRLIFMTFHGKPR--ASHDVMHHV-----
-----
... HESPYVMLVPLFILAAAGALFAGVMFREYFFGH-EYLE---FW--
... KGAIFTGPENEILEEHHHVPFLVALSPFLAMAAGFVVAWYFYIRS-----
-----
... PETPKRLAAQHPGLYQFLLNKWYFDELYDFLFVRPAKALGRFLWKR-GDGWLIDGHGPDGIS-
... ARVVDVTNRVRLQSGYLYHYAFAMLIGVAALVTWMLGSNF-----
259 >WP_162293147_NuoL_Phyllobacterium_zundukense
260 MLY-----LAIVFLPLLGLIAGLFG----SSIGAKASEYVTTGLLIVCAVLSWIAFGTVAL--
... GHGEAFKVPVM-HWVESGSLSDWALRIDTLTAVMLVVNTVSALVHTYSIGYMHHDPD-----
... RPRFFAYLSLFTFAMLMLVTGDNLVQMFFGWEGVGLASYLLIGFWFKKPSANAAAIKAFVNVRVGDFGFLGIF
... ALFVLFDTVQF--
... DTLFTSAAQYLPVAVLNFLGYALDKQGAITIAACLLLFMGAMGKSAQFLLHTWLPDAMEGPTPVSALIHAATMVTA
... GVFMVARLSPIFELSHTALIFVTFIGATTAFFAATVGLVQNDIKRVIAYSTCSQLGYMFVALGLGAYGAGIFHL
... FTHAFFKALLFLGAGSVIHAVSDEQDMRHMGGLRKLIPQTYWLMVVGTVALTGLGIPGTLIG-----
... TAGFFSKDMIIESAYASHSPVAGYAFILLVIAAIFTSFYSWRLIFMTFHGKPR--ASHDVMHHV-----
-----
... HESPYVMLVPLFILAFGALFAGVGFHEYFFGH-EYAE---FW--
... KGAIFTGPENEILEEHHHVPFLVAMSPFLAMAAGFLVSWYFYIRS-----
-----
... PETPKRLAAQHPGLYQFLLNKWYFDELYDFLFVRPAKALGRFLWKQ-GDGWLIDGHGPDGIS-
... ARVVDVTNRVRLQTGYLYHYAFAMLIGVAALVTWMLGSNF-----
261 >WP_105735480_NuoL_Phyllobacterium_myrsinacearum
262 MLY-----LAIVFLPLLGLIAGLFG----SSIGAKASEYVTTGLMIVVAVLSWIAFTTVAL--
... GHGEAFKVPVM-HWVESGSLSDWALRIDTLTAVMLIVVNTVSALVHTYSIGYMHHDPH-----
... RPRFFAYLSLFTFAMLMLVTGDNLVQMFFGWEGVGLASYLLIGFWFKKPSANAAAMKAFIVNVRVGDFGFLGIF
... ALFVLFDTVQF--
... DTLFQSAAQYLPVAVLNFLGYALGKQEAITVACLLLFMGAMGKSAQFLLHTWLPDAMEGPTPVSALIHAATMVTA
... GVFMVARLSPIFELSHTALIVVTLVGATTAFFAATVGLVQNDIKRVIAYSTCSQLGYMFVALGLGAYGAAIFHL
... FTHAFFKALLFLGAGSVIHAVSDEQDMRHMGGLRKLIPQTYWMMIIGTVALTGLGIPGTAIG-----
... TAGFFSKDAIIESAYASTSPAAGYAFILLVIAALFTSFYSWRLIFMTFHGKPR--ASHDVMHHV-----
-----
... HESPYVMLVPLFILAIAGALFAGVIFREYFFGH-EYAE---FW--
... KGALFTGKENEILELHHHVPALVAASPFLAMLAGFILSWYFYIRS-----
-----
... PQTPVRLAEQHRGLYQFLLNKWYFDELYDFLFVRPAKALGKFLWKK-GDGWLIDGHGPDGIS-
... ARVVDVTNRVRLQTGYLYHYAFAMLIGVAALVTWMLGSNF-----
263 >PSH67906_NuoL_Phyllobacterium_brassicearum
264 MY-----LAIVFLPLLGLIAGLFG----SSIGAKASEYVTTGLLIVCAVLSWIAFGTVAL--
... GHGEAFKVPVA-LWVESGSLSDWALRIDTLTAVMLVVNTVSALVHTYSIGYMHHDPD-----
... RPRFFAYLSLFTFAMLMLVTGDNLVQMFFGWEGVGLASYLLIGFWYKKPSANAAAIKAFVNVRVGDFGFLGIF
... ALFVLFDTVQF--
... DTLFTSAAQYLPVAVLNFLGYSLDKQGAITITCLLLFMGAMGKSAQFLLHTWLPDAMEGPTPVSALIHAATMVTA
... GVFMVARLSPIFELSHAALIFVTFIGATTAFFAATVGLVQNDIKRVIAYSTCSQLGYMFVALGLGAYGAGIFHL
```





```
270... HESPPVMLVPLFILAVGALLAGVLFEGYFVGH-EYNE---FW--
... KGALFTLPENEILEHFHHVPLWVKLSPFIAMIVGFLLAYQFYIRS-----
...
... PETPKRLAAQHGLYQFLLNKWYFDELYDFLFVRPAMRIGRFLWKQ-GDGRVIDGLGPDGIA-
... ARVTDVTRGVVRLQTGYLYHYAFVMLIGIAALVTWMLGNSF-----
271 >WP_055969364_NuoL_Aminobacter_sp._DSM101952
272 MY-----QLIVFLPLLGLIAGLFG----RSIGAKASEYITSGLLVVSAALSWVAFITVGL--
... GDVEVFTVPVL-RFIDSGGLQANWALRIDTLTTVMLVVVNTVSALVHIYSIGYMHHDPH-----
... RPRFFAYLSLFTFAMLMLVTSNQLVQMFFGWEGVGLASYLLIGFWYKKPSANAAAIKAFVVRVGDGFGFLGIF
... GLFVLFGSVEF--
... STIFAGAASYLPAVLTFLGYALDKQGALTIVCLLLFMGAMGKSAQVPLHTWLPDAMEGPTPVSALIHAATMVTA
... GVFMLARMSPVFELSHSALTVVTFIGAFTAFFAATVGLVQNDIKRVIAYSTCSQLGYMFVALGMGFYSAAIFHL
... FTHAFFKALLFLGSGSVIHAVSDEQDMRKMGGRLKLIPTTYWMMVIGTLALTGVGIPATIIG-----
... TAGFFSKDAIIEGAFVGHNAVAGLAFALVIAACFTSFYSWRLIFMTFHGKPR--ATADVMHHV-----
...
... HESPPVMLVPLFILAVGALFAGVVFHDQFIGE-GYNE---FW--
... KGALFTLETNHILHDFHGVPMWVKLAPFVAMIAGFLMAYLFYIRS-----
...
... PEMPVLAERHRGLYAFLLNKWYFDELYDFLFVRPAKWLGRFLWKK-GDGWLIDGFGADGIS-
... ARVVDVTNRVVKLQTGYLYHYAFAMLIGVAALVTWMLGSSF-----
273 >WP_184698080_NuoL_Aminobacter_aganoensis
274 MY-----HFIVFLPLLGLIAGLFG----RSIGAKASEYITSGLLVVSAALSWVAFITVGL--
... GDVEVFTVPVL-RFIDSGGLQANWALRIDTLTTVMLVVVNTVSALVHIYSIGYMHHDPH-----
... RPRFFAYLSLFTFAMLMLVTSNQLVQMFFGWEGVGLASYLLIGFWYKKPSANAAAIKAFVVRVGDGFGFLGIF
... GLFVLFGSVEF--
... STIFAGAASYLPAVLTFLGYALDKQGALTIVCLLLFMGAMGKSAQVPLHTWLPDAMEGPTPVSALIHAATMVTA
... GVFMLARMSPVFELSHSALTVVTFIGAFTAFFAATVGLVQNDIKRVIAYSTCSQLGYMFVALGMGFYSAAIFHL
... FTHAFFKALLFLGSGSVIHAVSDEQDMRKMGGRLKLIPTTYWMMVIGTLALTGVGIPATIIG-----
... TAGFFSKDAIIEGAFVGHNAVAGLAFALVIAACFTSFYSWRLIFMTFHGKPR--ATADVMHHV-----
...
... HESPPVMLVPLFILAVGALFAGVVFHDQFIGE-GYNE---FW--
... KGALFTLETNHILHDFHGVPMWVKLAPFVAMIAGFLMAYLFYIRS-----
...
... PEMPVLAERHRGLYAFLLNKWYFDELYDFLFVRPAKWLGRFLWKK-GDGWLIDGFGADGIS-
... ARVVDVTNRVVKLQTGYLYHYAFAMLIGVAALVTWMLGSSF-----
275 >WP_115731531_NuoL_Aminobacter_aminovorans
276 MTY-----HFIVFLPLIGFLIAGLLG----RSIGAKASEYITSGLLVSAVLSWVAFITVAL--
... GDVETFTVPVL-RFLDVGGIQADWALRIDTLTTVMLVVVNTVSALVHIYSIGYMHHDPH-----
... RPRFFGYLSLFTFAMLMLVTSNQLVQMFFGWEGVGLASYLLIGFWYKKPSANAAAIKAFVVRVGDGFGFLGIF
... GLFVLFGSVEF--
... STIFAGAASYLPAVLTFLGYALDKHNALTVVCLLLFMGAMGKSAQVPLHTWLPDAMEGPTPVSALIHAATMVTA
... GVFMLARLSPVFELSHSALTVVTFIGAFTAFFAATVGLVQNDIKRVIAYSTCSQLGYMFVALGMGFYSAAIFHL
... FTHAFFKALLFLGSGSVIHAVSDEQDMRKMGGRLKLIPTTYWMMVIGTLALTGVGIPATIIG-----
... TAGFFSKDAIIEGAFVGHNAVAGFAFAMLVIAACFTSFYSWRLIFMTFHGKPR--ATADVMHHV-----
...
... HESPPVMLVPLFILAAGALFAGVIFHDQFIGE-AYAE---FW--
... KGALFTLDTNHILHDFHSVPMWVKLAPFAAMIGGFAMAYLFYIRS-----
...
... -----
```

```
276... PEMPKVLAERHRGLYAFLLNKWYFDELYDFLFVRPAKWLGSLWKK-GDGWLIDGFGADGIS-
... ARVVDVTNRVVKLQGTGYLYHYAFAMLIGVAALVTWMMLGSSF-----
277 >MBA8904744_NuoL_Aminobacter_ciceronei
278 MMY-----HFIVFLPLLGLIAGLLG----RSIGAKASEYVTSGFLVISAVLSWIAFVTVAL--
... GDVEAFTVPVL-RFLDVGGLQADWALRIDTLTAVMLVVNTVSALVHIYSIGYMHHDPH-----
... RPRFFAYLSLFTFAMLMLVTSNQLVQMFFGWEGVGLASYLLIGFWYKKPSANAAAIKAFVNVRVGDFGFLGIF
... GLYVLFSGSVEF--
... STIFASAASYLPAVLNFLGYALDKHSALTIVCLLLFMGAMGKSAQVPLHTWLPDAMEGPTPVSALIHAATMVTA
... GVFMLARLSPVFELSHTALTVVTFIGAITAIFAATVGLVQNDIKRVIAYSTCSQLGYMFVALGMGFYSAAIFHL
... FTHAFFKALLFLGSGSVIHAVSDEQDMRKMGGRLKLIPTTYWMMVIGTLALTGVGIPATIIG-----
... TAGFFSKDAIIEGAFVGHNAVAGFAFAMLVIAACFTSFYSWRLIFMTFHGKPR--ATADVMHHV-----
... -----
... HESPPVMLVPLFVLA VGALLAGVVFHDQFIGE-AYNE---FW--
... KGALFTLDTNHILHDFHGVPMWVKLAPFAAMIGGFAMAYLFYIRS-----
... -----
... PEMPKVLAERHRGLYAFLLNKWYFDELYDFLFVRPAKWLGSLWKK-GDGWLIDGFGADGIS-
... ARVVDVTNRVVKLQGTGYLYHYAFAMLIGVAALVTWMMLGSSF-----
279 >MBB6464676_NuoL_Aminobacter_lissarensis
280 MMY-----HFIVFLPLVGLIAGLFG----RSIGAKASEYITSGLLVVS AVLSWFAFATVAL--
... GDVEVFTVPVL-RFLDVGGIQADWALRIDTLTTVMLVVNTVSALVHIYSIGYMHHDPH-----
... RPRFFGYLSLFTFAMLMLVTSNQLVQMFFGWEGVGLASYLLIGFWYKKPSANAAAIKAFVNVRVGDFGFLGIF
... GLYVLFSGSVEF--
... STIFATAASYLPAVLNFLGYALDKHNALTIVCLLLFMGAMGKSAQVPLHTWLPDAMEGPTPVSALIHAATMVTA
... GVFMLARLSPVFELSHTALTVVTFVGAFTAFFAATVGLVQNDIKRVIAYSTCSQLGYMFVALGMGFYSAAIFHL
... FTHAFFKALLFLGSGSVIHAVSDEQDMRKMGGRLKLIPTTYWMMVIGTLALTGVGIPATIIG-----
... TAGFFSKDAIIEGAFVGHNAVAGFAFAMLVIAACFTSFYSWRLIFMTFHGKPR--ATADVMHHV-----
... -----
... HESPPVMLVPLFILAVGALFAGVIFHDQFIGE-AYNE---FW--
... KGALFTLDTNHILHDFHSVPMWVKLAPFAAMIGGFAMAYLFYIRS-----
... -----
... PEMPKVLAERHRGLYAFLLNKWYFDELYDFLFVRPAKWLGSLWKK-GDGWLIDGFGADGIS-
... ARVVDVTNRVVKLQGTGYLYHYAFAMLIGVAALVTWMMLGSSF-----
281 >WP_068881841_NuoL_Paramesorhizobium_deserti
282 MLY-----YAI VFLPLLGLAAGLLG----KQLGVKACEYITSGFLVISAALSWVAFFQVAL--
... GHGETLRIPVL-HWVNSGALTFDWA FRIDTLTAVMLVVNTVSALVHIYSIGYMHHDPN-----
... RPRFFAYLSLFTFAMLMLVTADNLVQMFFGWEGVGLASYLLIGFWYKKPSANAAAMKAFIVNV RVGDFGFLGIF
... GVFVLFSAVNY--
... DTIFAAAQYLP AVLNFLGYSLDRQGAIITIVCLLLFMGAMGKSAQVPLHTWLPDAMEGPTPVSALIHAATMVTA
... GVFMV ARMSPLFELSQTALTFVTIIGATTAFFAATVGLVQNDIKRVIAYSTCSQLGYMFVALGVGAYGAGIFHL
... FTHAFFKALLFLGAGSVIHAVSDEQDMRRMGGLRKLIPPTTYWMMIIGTVALTGLGIPFTSIG-----
... TAGFFSKDAIIESSYASHAPAAGYAFVLLVVAALFTSFYSWRLIFMTFHGKPR--ATADVMHHV-----
... -----
... HESPPVMLVPLFVLALGALLAGFLFHDYFFGH-HYVE---FW--
... KGALFTGPENEILEEYHHVPFLVKIAPFVAMAIGFVIAWIFYIRS-----
... -----
... PETPKELARRHPGLYQFLLNKWYFDELYDFLFVRPAKALGRLLWKG-GDGWLIDGFGPDGIS-
... ARVVDVTNRVVKLQSGYLYHYAFAMLIGVAALVTWMMLGSSF-----
283 >WP_126010653_NuoL_Georrhizobium_profundi
```

```
284 MY-----HAIVFLPLIGAIAGLFG----RSLGAKACEYITSGFLVFAAFLSWIAFFSVAY--
... GDTDVIRVPVL-QWIQSGSMSVDWSFRIDTLTAVMLVVNTVSALVHIYSIGYMHHDPH-----
... RPRFFAYLSLFTFAMLMLVTSNLLQMFFGWEGVGLASYLLIGFWYKKPTATAAAMKAFIVNRVGDGFGFALGIF
... GIFVLFGSISF--
... DTIFAGAADFMPVVLNFLGYSLTRADALTVTCLLLFMGAMGKSAQFLHTWLPDAMEGPTPVSALIHAATMVTA
... GVFLVARMSPVFELSIDARTVVVVIIGAITAFFAATVGLVQNDIKRVIAYSTCSQLGYMFVALGIGAYGAAIFHL
... FTHAFFKALLFLGAGSVIHAVSDEQDMRRMGGLRKYIPRTYWMMIIGTVALTGVGIPGLYFG-----
... TAGFFSKDAIIESAFVAENAAAGFAFTMLVIAALFTSFYSWRLIFMTFHGKPR--ASADVMHHV-----
... -----
... HESPAIMMVPLYILAVGALLAGILFHKQFFGD--YYEG---FW--
... QGALFTLPTNQILEEFHHVFPFVWKLSPFMAMLI GLVTAWYMYIRS-----
... -----
... PETPKELAAQHRGLYQFLLNKWYFDELYDFLFVRSSKALGRFLWKE-GDGRVIDGFGPNGVA-
... ARVQDVTGRVVRLQSGYLYHYAFVMLIGVAALVTWMMLGSAF-----
285 >MBE7185388_NuoL_Methylobacterium_mesophilicum
286 MY-----QAIIVFLPLLGLVGLFG----KRLGARPSELITSGFMVVAAVLSWLAFFTVAL--
... GESEPVIVPLL-RFLDIGALQADWTLRIDTLTAVMLIVNTISTLVHIYSIGYMHHDPH-----
... RPRFFAYLSLFTFAMLMLVTSNLLQMFFGWEGVGLASYLLIGFWYQKPSANAAAMKAFIVNRVGDGFGFLLGIF
... GVFLVFGTVDF--
... STIFANAQTYIPAVFNFLGYQLDKQSALTVTCLLLFMGAMGKSAQVPLHTWLPDAMEGPTPVSALIHAATMVTA
... GVFMARLSPLFEHSQTALTVVTFIGALTAIFAATVGLVQNDIKRVIAYSTCSQLGYMFVALGLGFYSAAIFHL
... FTHAFFKALLFLGAGSVIHAVSDEQDMRKMGGGLRKLIPPTYWMMVIGTLALTGVGIPATLIG-----
... TAGFFSKDVIIEGAFVGNIFATMAYVLLVVAAVFTSFYSWRLIFMTFHGKPR--ASHEVMHHV-----
... -----
... HESPPVMLVPLFVLAAGALFAGVLFEGYFVGE--EYAE---FW--
... KGALFTLPENEILEAFHTVPLWVKLSPFVAMLI GFFTAYQFYIRS-----
... -----
... PETPRRLAEAQPGLYQFLLNKWYFDELYDFLFVRPAKRIGHFLWKT-GDGRIIDGLGPDGLS-
... ARVQDITRSVVRLQTGYLYHYAFVMLIGVAALVTWMMVGNNF-----
287 >WP_099304717_NuoL_Zhengella_mangrovi
288 MY-----HAIVFLPLIGFLIAGLFG----
... RSIGAKASEYITSGLLVVS AVLSWAFFTVALEGHGTQAMIIPVL-TFIQSGDLAVDWAL-----
... AVMLVVNTVSALVHIYSIGYMHHDPD-----
... RPRFFAYLSLFTFAMLMLVTSNLLQMFFGWEGVGLASYLLIGFWYKKPSANAAAMKAFIVNRVGDGFGFALGIF
... GVFLVFGSVTF--
... ETIFANAATYLPVLSFLGHALDRQGAIITVCLLLFMGAMGKSAQFLHTWLPDAMEGPTPVSALIHAATMVTA
... GVFMVARLSPLFELSHTALVVVTVIGSITAFFAATVGLVQNDIKRVIAYSTCSQLGYMFAALGVGAYGAAIFHL
... FTHAFFKALLFLGAGSVIHAVSDEQDMRRMGGLRKLIPPTYWMMIVGTIALTGLGIPGTFIG-----
... TAGFFSKDIIIESVFASGSPVSASFSTMLAVAALFTSFYSWRLIFMTFHGKPR--ATADVMHHV-----
... -----
... HESPPVMLVPLFVLAAGALFAGVLFEGYFYGH--EYLA---FW--
... KGALFTGPENELLNEFHHVPLLVKLSPFVAMVAGFLIAWIFYISN-----
... -----
... PEMPRQVAQRHHGLYQFLLNKWYFDELYDFIFVRPAMWLGRFLWKK-GDGAVIDGLGPDGVA-
... ARVVDVTNRVVKLQSGYLYHYAFAMLI GVAALVTWMMLGSAF-----
289 >WP_139975675_NuoL_Ochrobactrum_sp._CGA5
290 MLY-----YAIIVFLPLLGLIAGLFG----NQIGAKASEYITSGFMVIVAILS WVFFQIPL--
... GHDAETVRIPVLHWVTSGLSFDWALRIDTLTGVMVVNSVSALVHIYSIGYMHHDPH-----
```

```
290... RPRFFAYLSLFTFAMLMLVTSNQLVQMFPGWEGVGLASYLLIGFWFKPSANAAAMKAFVNVNRVGDGFGFLLGIF
... GVFALFQSDY--
... NTIFAAAANYLPAVLNFLGYQLDKQSAITITCLLLFMGAMGKSAQFLLHTWLPDAMEGPTPVSALIHAATMVTA
... GVFVARMSPIFELSQTALLVVTIIGATTAFFAATVALVQNDIKRVIAYSTCSQLGYMFAALGVGAYGAAVFHL
... FTHAFFKALLFLCAGSVIHAVSEEQDMRRMGGLRKLIPITYWMMVIGTVAITGLGIPGTVIG-----
... TAGFFSKDAIIESVFASHSAASGYASTLLIVAALFTSFYSWRLIFMTFHGKPR--ASAEVMHHV-----
... -----
... HESPAVMFVPLLILGVGALFAGVVFKEFFFGH-EYAE---FW--
... KGALFTSAANQILEEYHHVPLWVKLSPFISMVLGFIVAWIFYIRS-----
... -----
... PEMPKALAARHRGLYQFLLNKWYFDELYDFLFVRPARWLGRVFWKG-GDGWLIDGFGPDGIS-
... ARVLDVTNRVVKMQSGYLYHYAFAMLIGVAALVTWMLGSSF-----
291 >WP_173191174_NuoL_Mesorhizobium_sediminum
292 MY-----HAIVFLPLLGLIAGLFG----RSIGAKASEYITSGFLIAAALSWLAFFTVGF--
... GDGEAFTVPVL-RFIQSGGLDVAWALRIDTLTVMLVVNTVSALVHVYSIGYMHHDPH-----
... RPRFFAYLSLFTFAMLMLVTADNLVQMFPGWEGVGLASYLLIGFWFKKPSANAAAIKAFVNVNRVGDGFGFLLGLF
... GVFVLFSGVNF--
... DTIFASAAVAEAIFTFLGWSLTQGGALTAICLLFMGAMGKSAQVPLHTWLPDAMEGPTPVSALIHAATMVTA
... GVFMLARLSPIFELSHAALLFVTFIGAFTAFFAATVGLVQNDIKRVIAYSTCSQLGYMFVALGMGFYSAAIFHL
... FTHAFFKALLFLGSGSVIHAVSDEQDMRKMGGGLRKLIPITYWMMVIGTLALTGVGIPLTVIG-----
... TAGFFSKDAIIEGAFAGHNLGAFATLLVVAAVFTSFYSWRLIFMTFHGKPR--ASSEVMHHV-----
... -----
... HESPPVMLVPLFILAVGALFAGIVFHDWFIGY-HHDA---FW--
... KGALFILPDNHILHEFHEVPLWVKLAPLVAMIVGFVTAYRFYIQS-----
... -----
... PDAPRQLAERHQGLYQFLLNKWYFDELYDFMFVRPAKRLGRFLWKK-GDGTVIDGMGPDGIA-
... ARVVDITDRVVKLQGTGYYHYAFAMLIGVAALVTWMLGGSY-----
293 >WP_110030771_NuoL_Hoeflea_marina
294 MY-----HAIVFLPLIGAIAGLFG----RSIGAKASEYVTTFLIVAAVLSWVAFFTVAM--
... GDAETIKIPVM-RWIDSGTLNVEWAFRIDTLTAVMLVVNTVSSLVHVYSIGYMHHDPH-----
... RPRFFAYLSLFTFAMLMLVTSNQLVQMFPGWEGVGLASYLLIGFWYKPSAAAAAMKAFIVNVNRVGDGFGFALGIF
... GVFVLFSGVGF--
... DTIFAGAADFIPQEMTLFGMSLDKHAMTGVCLLLFMGAMGKSAQFLLHTWLPDAMEGPTPVSALIHAATMVTA
... GVFVARMSPILFELSQSALTVVVVIIGAITAFFAATVGLVQNDIKRVIAYSTCSQLGYMFVALGIGAYGAAIFHL
... FTHAFFKALLFLGAGSVIHSVSDQDMRRMGGLRKHIPATYWMMIIGTVALTGLGIPGTIIG-----
... TSGFFSKDAIIESAFMAHNPAAGFAFTLLVVAALFTSFYSWRLIFMTFHGKPR--ASADVMHHV-----
... -----
... HESPPVMLVPLYILAAGALLAGFIFKDYFFGH-HYAE---FW--
... KGALFTLPENEIVEEYHHVPLWVALSPFLAMLIGFATAWFFYIRS-----
... -----
... PETPRRLAGEHQGLYQFLLNKWYFDELYDFLFVRPAKWLGTFLWKQ-GDGRVIDGFGPDGIA-
... ARVQDISGRAVRLQGTGYYHYAFVMLIGIAALVTWMLGSAF-----
295 >WP_066175677_NuoL_Hoeflea_olei
296 MY-----QAIIVFLPLIGALIAGLGG----RAIGAKASEYVTTFLIVAALLSWVAFFSVAL--
... GDGEVVRIQVL-RWMDSGSMTADWALRIDTLTAVMLVVNTVSCLVHVYSIGYMHHDPH-----
... RPRFFAYLSFFTFAMLMLVTSNQLVQMFPGWEGVGVASYLLIGFWFKKPSANAAAMKAFIVNVNRVGDGFGFLLGMF
... GLFVLFSGISF--
... DTIFASVADYLPAEITLFGMELDKAHALTAVCLLLFMGAMGKSAQFLLHTWLPDAMEGPTPVSALIHAATMVTA
```

```
296... GVFLVARMSPVFEHSPDALTFVTWIGAITAFFAATVGLVQNDIKRVIAYSTCSQLGYMFVALGIGAYGGAVFHL
... FTHAFFKALLFLGAGSVIHAVSDEQDMRRMGGLRKHIPLTYWMMIIGTIALTGVGIPGTMIG-----
... TAGFFSKDIIIESAYVAHNSASGVAFGLLVAAALFTSFYSWRLIFMTFHGKPR--ASSDVMHHV-----
...
... HESPMVMLVPLFILAVGALFAGVLFEGYFFGH-HYAE---FW--
... KGALFTGPENEILEEFHHVPLWVKLSPFVAMLLGLVTAWFFYIRS-----
...
... PETPKRLAEDHQMLYRFLLNKWFDELYDFIFVRPAKALGRLLWKQ-GDVRIIDGFGPNGVA-
... ARAQDITGWVRLQTGYLYHYAFVMLIGIAALVTWMLGSAF-----
297 >WP_097104131_NuoL_Hoeflea_halophila
298 MY-----HAIVFLPLIGALIAGFGG----RAIGAKASEYVTTLFLIVAALLSWVAFLAVAM--
... GDGEMIRVPIM-RWIDSGSLNVEWALRIDTLTAVMLVVNTVSVCLVHVYSIGYMHHDPH-----
... RPRFFAYLSFTFAMLMLVTSNLLQMFFGWEGVGVASYLLIGFWYKKPSANAAAMKAFIVNRVGDGFGFLLGIF
... GLFVLFGSASF--
... DAIFAGVADYLPSEITLFGMHLDKANALTGVCLLLFGAMGKSAQFLLHTWLPDAMEGPTPVSALIHAATMVTA
... GVFLVARMSPVFEYAPDALTVVTWIGAITAFFAATVGLVQNDIKRVIAYSTCSQLGYMFVALGIGAYGGAI FHL
... FTHAFFKALLFLGAGSVIHAVSDEQDMRRMGGLRKKIPMTYWMMIIGTIALTGVGIPGTLIG-----
... TAGFFSKDIIIESAFVAQNSAAGVAFGLLVIAALFTSFYSWRLIFMTFHGKPR--ASADVMHHA-----
...
... HESPPVMLVPLFILAVGALLAGVVFKEFFFGH-DYDA---FW--
... KGALFTLPGNTIVEEFHYVPLWVKLSPFVAMLLIGLVSAWYFYIRS-----
...
... PETPKRLAEDHQMLYQFLLNKWFDELYDFIFVRPAKWLGSVLWKQ-GDVRVIDGFGPNGIA-
... ARVQDVTGRITRLQTGFLYHYAFVMLIGIAALVTWMLGSAF-----
299 >WP_007197627_NuoL_Hoeflea_phototrophica
300 MY-----QAIVFLPLIGALIAGFGG----RAIGAKASEYVTTLFLIVAAVLSWVAFFTVAM--
... GETEMIRVPVM-RWIDSGSFSVDWALRIDTLTAVMLVVNTVSSLVHLYSIGYMHHDPH-----
... RPRFFAYLSLFTFAMLMLVTSNLLQMFFGWEGVGVASYLLIGFWYKKPSANAAAMKAFIVNRVGDGFGFLLGMF
... GVFMFLGFSISY--
... DAIFAGAADFIPVEITLFGMHLDKAHALTAVCLLLFGAMGKSAQFLLHTWLPDAMEGPTPVSALIHAATMVTA
... GVFLVARMSPVFEYAPDALTVVVITGAITAFFAATVGLVQNDIKRVIAYSTCSQLGYMFVALGIGAYGAAVFHL
... FTHAFFKALLFLGAGSVIHAVSDEQDMRRMGGLRKKIPITYWMMIIGTIALTGVGIPGTVIG-----
... TAGFFSKDAIIESAYVAHNPAAGFAFGLLVIAALFTSFYSWRLIFMTFHGKPR--ASADVMHHA-----
...
... HESPPVMLVPLFVLAVGALFAGVIFKEYFFGH-HYTE---FW--
... GSALFTLPDNKIVEEFHHVALWVKLSPFVAMLLGLVTAWYFYIRS-----
...
... PGTPKQLAEDHSLLYQFLLNKWFDELYDFIFVRPAKWLGRFLWKQ-GDGRVIDGYGPDGIA-
... ARVQDITGRVVKLQTGYLYHYAFVMLIGIAALVTWMLGSAFR-----
301 >WP_011580373_NuoL_Chelativorans
302 MY-----QAIVFLPLAGFLIAGLFG----RSIGAKGSEYITSGLLVSAFLSWIAFFQVGL--
... GDGEAITIPLL-RFISSGALDVDWALRIDTLTAVMLVVNTVSALVHIYSIGYMHHDPH-----
... RPRFFAYLSLFTFAMLMLVTSNLLVQMFFGWEGVGLASYLLIGFWYKKPSANAAAMKAFIVNRVGDGFGFALGIF
... GVFLVFGSINF--
... DTIFANTAAMPGELTFLGYALDPHSALTVVCLLLFLGAMGKSAQVPLHTWLPDAMEGPTPVSALIHAATMVTA
... GVFMVARLSPIFELSQTALTVVTAVGAFTAFFAATVGLVQNDIKRVIAYSTCSQLGYMFVALGTGFYSAAIFHL
... FTHAFFKALLFLGSGSVIHAVSDEQDMRKMGGGLRKLIPQTYWMMIIGTLALTGVGIPGTLIG-----
... TAGFFSKDAIIEGSFVAHNAVAPIAFTLLVVAAVFTSFYSWRLIFMTFHGKPR--ASSDVMHHV-----
```

```
302... -----  
... HESPYVMLVPLFLLAIGAI FAGLVFEGFFVGH-EYDH---FW--  
... KGALFTLPDNHMFVEEFHHVPLWVKLSPFVAMLFGLLVAWQFYIRS-----  
... -----  
... PESPKRLAERHRALYAFLLNKWYFDEVYDFLFVRPAQRLGRFLWKK-GDGWFIDGFGPDGIS-  
... ARVVDVANRVVKLQTGYLYHYAFAMLIGIAAFVTWMLGSSF-----  
303 >WP_198476026_NuoL_Aquamicrobium_sp._cd-1  
304 MY-----HAIVFLPLAGFLIAGIFG----RAIGAKASEFVTSGFLLVAALLSWVAFFQVGL--  
... GDAAAFSVPVL-RFIEVGS�DVSWA FRIDTLTTVMLVVNSVSALVHAYSIGYMHDPH-----  
... RPRFFAYLSLFTFAMLMLVTSNLDVQMFEGWEGVGLASYLLIGFWFKKPSANAAAIKAFVNVRVGDFGFLGMF  
... GYYVMFGSVNF--  
... DTIFANAAAIAQNPFQFLGWSLTQAGALTAICLLL FGMAMGKSAQVPLHTWLPDAMEGPTPVSALIHAATMVTA  
... GVFLARLSPVFELSDTALLVVTIIGAITAFFAATVGLVQNDIKRVIAYSTCSQLGYMFVALGLGFYSAAVFHL  
... FTHAFFKALLFLGSGSVIHAVSDEQDMRKMGGRLKLIPTTYWMMIIGTIALTGVLPTATYIG-----  
... TAGFFSKDAIIEGAFASSSAAATFAFIMLVVAAMFTSFYSWRLIFLTFHGQPR--ASEEVMHHV-----  
... -----  
... HESPPVMLVPLYLLAVGALFSGFVFYGYFLGD-NYDG---FW--  
... QGALFTLEDNHILHDYHSVPFWKASPFAAMILGFLLAYQFYIRS-----  
... -----  
... PETPKRLAAQHSGLYQFLLNKWYFDELYDFIFVRPAKRLGHFLWKK-GDGVVIDGFGPNGIA-  
... ARVVDITDRVVKMQTGXYLYHYAFAMLIGVAALVTWMLGGSL-----  
305 >WP_053998662_NuoL_Ahrensia_marina  
306 MY-----HAIVFLPLLGAIVAGFGG----RAIGAKASEYITSGFMVIAAILS SWVAFLTVAM--  
... AHDDHSATVQVMRWIQVGS�DWNWAFRIDTLTAVMLVVNTVSTLVHIYSIGYMHDPH-----  
... RPRFFAYLSLFTFAMLMLVTSNLDVQMFEGWEGVGLASYLLIGFWYKKPSANSAAMKAFIVNVRVGDFGFALGIF  
... GVFLVFGSVNF--  
... DTIFANAATYLP AELTFLGYS�DKSHALTVVCLLL FGMAMGKSAQFLLHTWLPDAMEGPTPVSALIHAATMVTA  
... GVFLVARMSPIFELSQTALTVVVIIGATTAFFAATVGLVQNDIKRVIAYSTCSQLGYMFVALGIGAYGAAVFHL  
... FTHAFFKALLFLGAGSVIHAVSDEQDMRRMGGRLKLIPTTYWMMIIGTVALTGVGIPGTLIG-----  
... TAGFFSKDAIIESAFVAQNSAAGYAFVMLVVAALFTSFYSWRLIFMTFHGKPR--ATADVMHHV-----  
... -----  
... HDSPPVMLVPLFILAVGAILAGVVFHGYFFGH-HYDE---FW--  
... KGALFTLPDNNIVDEFHNVPFLVKWSATIVMLLGLLGAWYMYIRS-----  
... -----  
... PQTPASLAAQHNGLYKFLNKWYFDELYDFLFVRPAKRLGSFLWKR-GDGWLIDGFGPNNIA-  
... ARVSGLAQRAVKVQTGFLYHYAFAMLIGVAALVTWIMLGGIH-----  
307 >WP_127709278_NuoL_Sinorhizobium_meliloti_USDA1025  
308 MDTIV----KAIVFLPLIGFLIAGLLG----TQIGAKASEYVTSGLMIVTAALSWFVFFHVAL--  
... GEEEMIKVSVL-RWIQSGSFDVEWAFRVDTLTAVMFVVNTVSTLVHIYSIGYMHDPN-----  
... RPRFFAYLSLFTFAMLMLITSNLLQMFEGWEGVGLASYLLIGFWYKKPSANAAAMKAFIVNVRVGDFGFSLGIF  
... CVFVLFGSINF--  
... ETIFAAAQNYLPAEINLFGMQLDKGHALTATCLLL FGMAMGKSAQFLLHTWLPDAMEGPTPVSALIHAATMVTA  
... GVFLVARMSPFLFELSPDALTVVTLIGAITAFFAATVGLVQNDIKRVIAYSTCSQLGYMFVALGVGAYGAAIFHL  
... FTHAFFKALLFLGAGSVIHAVDGEQDMRYMGGRLRTHIPVTYWMMFIGTIALTGVGIPGTVIG-----  
... TAGFFSKDAIIESTFASHSVVSGLAFALLVIAALFTSFYSWRLTFMTFHGKPR--ASSDVMHHV-----  
... -----  
... HESPQVMLVPLYILAAGALVAGFLFHDYFFGH-HYAE---FW--  
... QGALFTSAENELLEYYHHVPLWVKWSPFAAMALGLFTAWYMYIRS-----
```

```
308... -----  
... PETPKYLAEQHRGLYQFLLNKWYFDELYDFLFVRSAKRLGTFLWKE-GDGRVIDGYGPNGLIA-  
... ARVLDVTDTRVRLQTGYLYHYAFAMLIGIAALVTWMLGSSF-----  
309 >WP_132561602_NuoL_Rhizobium_sullae  
310 MFLY-----KAIVFLPLIGAIAGLFG----  
... RAIGAKASEYVTCGLMIVAASVLSWYVFTVGMGHLEGGPIKVEVL-  
... RWIQSGGIDASWSLRIDTLTSVMLIVVNTVSTLVHVYSIGYMHHDPH-----  
... RPRFFAYLSLFTFAMLMLVTSNLAQMFPGWEGVGLASYLLIGFWYKKPSANAAAIAKAFVNVNRVGDGFGFVLGIA  
... GIFVLFGSINL--  
... DTIFANASSFAPQELNLFQMQLDKAHALTGICLLLFGAMGKSAQFLLHTWLPDAMEGPTPVSALIIHAATMVTA  
... GVFLVARMSPLFELSPDALVFVTFIGAITAFFAATVGLVQNDIKRVIAYSTCSQLGYMFVALGVGAYGAAIFHL  
... FTHAFFKALLFLGAGSVIHAVDGEQDMRYMGGLRTHIPVTFWMMTIGTLALTGVGIPFTPVG-----  
... FAGFFSKDVIIIEATYASHSPVAGFAFTLLVIAALFTSFYSWRLAFLTFFGTTPR--ASHEVMHHV-----  
-----  
... HESPQVMLVPLYLLAIGAVLSGVVFEQYFYGH-HYVE---FW--  
... KGALFTGAENELLEEFHHVPAWVALSPFIAMLLGFVTAWYLIQS-----  
-----  
... PSTPRVLAQQHRVLYQFLLNKWYFDELYDFLFVRSAKALGRFLWKK-GDIGVIDAYGPNGLVA-  
... ARVVDVTDTRVRLQTGYLYHYAFAMLIGIAALVTWMLGSSF-----  
311 >WP_020921010_NuoL_Rhizobium_etli_bv.mimosae  
312 MFLY-----KAIVFLPLIGAIIVAGLFG----  
... RAIGAKASEYVTSGLMIVAGILSWIVFFNVGMGHLEGGPIKVEVL-  
... RWIQSGGIDVSWSLRVDTLTSVMLIVVNTVSTLVHIYSIGYMHTDPH-----  
... RPRFFAYLSLFTFAMLMLVTADNLAQMFPGWEGVGLASYLLIGFWFKKPSATAAAMKAFIVNVNRVGDGFGFVLGIA  
... GVFLVFGSINL--  
... DTIFANASNFAPELNLFGMQLDKAHALTGICLLLFGAMGKSAQFLLHTWLPDAMEGPTPVSALIIHAATMVTA  
... GVFLVARMSPLFELSPDALTVVTVIGAITAFFAATVGLVQNDIKRVIAYSTCSQLGYMFVALGVGAYGAAIFHL  
... FTHAFFKALLFLCAGSVIHAVDGEQDMRYMGGLWPHIKVTGGLMIIGTLAITGVGIPFTPPG-----  
... LAGFFSKDVIIIEATYASHSPVAGFAFSLVIAALFTSFYSWRLIFMTFFGKPR--ASHEVMHHV-----  
-----  
... HESPQVMLVPLYLLAVGAI FAGVIFEGRFYGE-EYAE---FW--  
... KGALFTGAENELVEEFHHVPALVGLSPFIAMLLIGFVIAWYMYIRS-----  
-----  
... PQTPRVLAKQHRVLYHFLLNKWYFDELYDFLFVRTARALGRFLWKK-GDVGVIDTYGPNGLVA-  
... ARVAVTDTRVRLQTGYLYHYAFAMLLGIAALVTWMLGSSF-----  
313 >WP_183260520_NuoL_Aminobacter_niigataensis  
314 MY-----QLIVFLPLLGLIAGLFG----RSIGAKASEYITSGLLVSAVLSWVAFITVGL--  
... GDVEVFTVPVL-RFIDSGGLQANWALRIDTLTVVMLVVNTVSALVHIYSIGYMHHDPH-----  
... RPRFFAYLSLFTFAMLMLVTSNLAQMFPGWEGVGLASYLLIGFWYKKPSANAAAIAKAFVNVNRVGDGFGFLLGIF  
... GLFVLFGSVEF--  
... STIFAGAASYLPAELTFLGYALDKQGALTIVCLLLFGAMGKSAQVPLHTWLPDAMEGPTPVSALIIHAATMVTA  
... GVFM LARMSPVFELSASALTVVTFIGAFTAFFAATVGLVQNDIKRVIAYSTCSQLGYMFVALGMGFYSAAIFHL  
... FTHAFFKALLFLGSGSVIHAVSDEQDMRKMGGRLRRIPTTYWMMVIGTLALTGVGIPATIIG-----  
... TAGFFSKDAIIEGAFVGHNAVAGLAFAMLVVAACFTSFYSWRLIFMTFHGKPR--ATADVMHHV-----  
-----  
... HESPPVMLVPLFVLAVGALFAGVVFHDQFIGE-AYNE---FW--  
... KGAI FTLETNHILHDFHGVP MWK LAPFAAMISGFLVAYLFYIRS-----  
-----
```



```
314... PEMPVKLAERHRGLYAFLLNKWYFDELYDFLFVVRPAKWLGRFLWKK-GDGWLDIDGFGADGIS-
... ARVVDVTNRVVKLQGTGYLYHYAFAMLIGVAALVTWMLGSSF-----
315 >WP_109613072_NuoL_Pseudaminobacter_salicylatoxidans
316 MY-----QAIVFLPLLGLFIVGLFG----NSLGARASEYITSGFLVIAAVLSWVAFFSVGI--
... GSTEFTVPLL-RFIDSGTLQSDWALRVDTLTVVMLVVVNTVSALVHIYSIGYMHHDPH-----
... RPRFFAYLSLFTFAMLMLVTSNQLVQMFFGWEGVGLASYLLIGFWYKRPSANAAAIKAFVNVRVGDFGFILGIA
... GVFLFLGFSVNF--
... DTIFATAASYVPVEFNFLGWDVDRAGALTVICLLL FMGAMGKSAQVPLHTWLPDAMEGPTPVSALIHAATMVTA
... GVFMLARLSPIFELSHTALLVVTFIGAITAFFAATVGLVQNDIKRVIAYSTCSQLGYMFVALGMGFYSAAIFHL
... FTHAFFKALLFLGSGSVIHAVSDEQDMRKMGGKLLIPTTYWMMVIGTLALTGVGIPGTIIG-----
... TAGFFSKDAIVEGAFAGIGHNAVAGFAFTLLVIIFTSFYSWRLIFMTFHGKPR--ATADVMHHV-----
... -----
... HESPPVMLVPLFILAVGALMAGVVFHDQFVGE-GYDA---FW--
... KTALYMLPENHILHEVHDVPLWVKLSPFIAMVIGFVVAYQFYIRK-----
... -----
... PETPKYLAAQHRGLYAFLLNKWYFDELYDFLFVRTAKRLGTFLWKK-GDGAVIDGLGPDGVS-
... AWVIDVTNRVVKLQGTGYLYHYAFVMLIGVAALVTWMLGSSF-----
317 >WP_189486644_NuoL_Limoniibacter_endophyticus
318 MF-----HAIVFLPLVGFLIAGLFG----RKIGATASEYVTSAFVGIAALLSWVFFQYAL--
... GDAEKVSVPL-TFLQSGGLDVSWALRIDTLTAVMLVVVNSVSTLVHVYSIGYMHHDPH-----
... RPRFFAYLSLFTFAMLSLVTADNLVQMFFGWEGVGLASYLLIGFWFKKQSAGAAAMKAFIVNVRVGDFGFLLGIF
... GLYVLTGFSVNF--
... DTIFANIQSMYAGELNFLGYALNPQAALTIVCLLL FMGAMGKSAQVPLHTWLPDAMEGPTPVSALIHAATMVTA
... GVVMLARMSPVFEFSHTALTVVTTIIGAITAIFAATVGLVQNDIKRVIAYSTCSQLGYMFVALGLGFYSAAV FHL
... FTHAFFKALLFLGSGSVIHAVSDEQDMRKMGGKRLKIPNTYWMMIIGTIALTGVGIPGTIVIG-----
... TAGFFSKDAIIEGAFSAHGAAGFAFILLTVAACMTSFYSWRLIFMTFHGKPR--ATADVMHSV-----
... -----
... HESPPVMLIPLYILAVGALFAGFLFHDAFIGE-AYGE---FW--
... KVSFLTLESNHILHEFHHPFVWKLAPFVAMLLGFALAYQFYIRS-----
... -----
... PETPVKLAERHRGLYAFLLNKWYFDELYDFLFVRPANCLGRILWKT-GDGTLIDGLGPNQVA-
... ARVVDVTNRVVKMQGTGYLYHYAFAMLIGVAALVTWMLGSSF-----
319 >WP_163269623_NuoL_Chelativorans_alearensis
320 MY-----QAIVFLPLAGFLIAGLFG----RSIGAKGAEYITSGLLVISALLSWVAFFTFAL--
... GDGEAFTVPVL-RFISSGALDVDWALRIDTLTVVMLVVVNTVSSLVHIYSIGYMHHDPH-----
... RPRFFAYLSLFTFAMLALVTADNLVQMFFGWEGVGLASYLLIGFWYKKPSANAAAIKAFIVNVRVGDFGFALGIF
... GVFLVFGSINL--
... DTIFANAATFLPAELNFLGYALTNQAALTIVCLLL FLGAMGKSAQVPLHTWLPDAMEGPTPVSALIHAATMVTA
... GVFVVARLSPLFELSSTALTAVGAFTAFFAATVGLVQNDIKRVIAYSTCSQLGYMFVALGTGFYGAIFHL
... FTHAFFKALLFLGAGSVIHAVSDEQDMRKMGGKRLRLLIPRTYWMMIIGTIALTGVGIPGTLLIG-----
... TAGFFSKDAIIEGSFVAHNAVAPIAFGLLVVAIIFTSFYSWRLIFMTFHGKPR--ASADVMHHV-----
... -----
... HESPLVMLVPLFLLAAGAVFAGILFEGFFVGH-EYDH---FW--
... KGALFTLPGNEILEEFHHVPLWVKLSPFAAMLLGLLVAWQFYIRS-----
... -----
... PGSPKELAKRQRVLYAFLLNKWYFDEVYDFLFVNPAPKRLGTFLWKR-GDGWLDIDGFGPDGIS-
... ARVIDVTNRVVKMQGTGYLYHYAFAMLIGIAALVTWMLGSSF-----
321 >WP_159586339_NuoL_Chelativorans_xinjiangense
```

```
322 MY-----QAI VFLPLAGFLIAGLFG----RSIGAKGAEYITSGLLVISALLSWIAFFTFAL--
... GDGEAFTVPML-RFISSGALDVDWALRIDTLTVVMLVVVNTVSSLVHIYSIGYMHHDPH-----
... RPRFFAYLSLFTFAMLALVTADNLVQMFFGWEGVGLASYLLIGFWYKKPSANAAAIAKAFIVNRVGDGFGFALGIF
... GV FVLFGSINL--
... DTIFANAATFLPAELNFLGYALTNQAALTVVCLLLFLGAMGKSAQVPLHTWLPDAMEGPTPVSAIHAATMVTA
... GVFMVARLSPLFELSSTALAVVTAVGAFTAFFAATVGLVQNDIKRVIAYSTCSQLGYMFVALGTGFYSAAIFHL
... FTHAFFKALLFLGAGSVIHAVSDEQDMRKMGGRLRRLIPQTYWMMIAGTLALTGVGIPGTIIG-----
... TAGFFSKDAIIEGSFVAHNAVAPIAFGLLVVAAIFTSFYSWRLIFMTFHGKPR--ASADVMHHV-----
... -----
... HESPLVMLVPLFLLAAGAVFAGVVFEGFFVGD-EYDH---FW--
... KGALFTLPGNEILEEFHHVPLWVKLSPFAAMLLGLFVAWQFYIRS-----
... -----
... PGSPKELAKRQRVLYAFLLNKWFDEIYDFLFVNPAPAKRLGTFLWKR-GDGWLIDGFGPDGIS-
... ARVIDVTNRVVKMQTGYYHYAFAMLIGVAALVTWMLGSSF-----
323 >WP_121644644_NuoL_Notoacmeibacter_ruber
324 MF-----HLIVFLPLIGFLIAGLFG----RSIGAKASEYVTTGFLYVAAVLSWIAFFDFGL--
... GHEEAMVVPVM-QWMNIGSLAVDWAFRIDTLTVVMLVVVNTVSALVHTYSIGYMHHDPQ-----
... RPRFFAYLSLFTFAMLMLVTSNNLVQMFFGWEGVGLASYLLIGFWYKKPSANAAAMKAFIVNRVGDGFGFLGIF
... GIFLLFGSVNF--
... DTIFANARQFDPSGMSFFGYGVPAAATAITVTCLLLFMGAMGKSAQVPLHTWLPDAMEGPTPVSAIHAATMVTA
... GVVMVARLSPIFELSQTALVVVTVVGAITAFFAATVGLVQNDIKRVIAYSTCSQLGYMFVALGVGAYGAAIFHL
... FTHAFFKALLFLGAGSVIHAVSDEQDMRFMGGLRKHIPATYWMMIIGTLALTGVGIPFTAIG-----
... TAGFFSKDVIIETAYASHSVVSTFAFVMLVVAACFTSFYSWRLIFMTFHGTTPR--ATADVMHHV-----
... -----
... HESPWMLIPLFILAAGAIFAGLLFEGFFYGH-EYGE---FW--
... KESL FVAGGNELLEEFHHVPVWVALSPFIAMLLGLVFAYWFYIRS-----
... -----
... PGTPKALAQSQSGLYAFLLNKWFDELYDFLFV RPAKWLRFLWKR-GDGTVIDGLGPDGIS-
... ARVVDVTNRVRLQSGYLYHYAFAMLIGVAALVTWMLGSAF-----
325 >WP_131616112_NuoL_Roseitalea_porphyridii
326 MY-----HAIVFLPLL GALIAGFGG----RALGAKACEYVTSGFLVIAAILSWIALITVGF--
... SEADPRTVQVM-RFMDSGNLDVDWAFRIDTLTVVMLVVVTTVSSLVHIYSIGYMHHDPH-----
... RPRFFAYLSLFTFAMLMLVTADNLIQMFFGWEGVGLASYLLIGFWYKKASANNAAMKAFIVNRVGDGFGFILGIF
... GV FVLFGSVNF--
... DTIFANAAAFASVDLTFWLMDLTAGEALTAVCLLLFLGAMGKSAQFLHTWLPDAMEGPTPVSAIHAATMVTA
... GVFMVARLSPIFEYSQDALTVVTIVGAITAFFAATVGLVQNDIKRVIAYSTCSQLGYMFVALGIGAYGAAMFHL
... FTHAFFKALLFLGAGSVIHAVSDEQDMRKMGGRLRKHIPMTYWMMIIGTVALTGVGIPGTYIG-----
... TAGFFSKDAIIESAFVGNAAAGIAFGLLVIAALFTSFYSWRLIFMTFHGKPR--ATADVMHHV-----
... -----
... HESPPVMLVPLYVLAAGALFAGVLFYSAFVGH-GHHEYNDFF--
... RTALFAGPDNHVLDEFHDVPYWKWSPFVMAIGLVTAWYMYIRS-----
... -----
... PETPAALARQHAGLYRFLLNKWFDELYDFLFV RPAKRLGTFLWKR-GDGWLIDGFGPDGVA-
... RRVTDVTGRVVKWQTGYIYHYAFAMVIGIAALVTWMLGGVL-----
327 >WP_109765985_NuoL_Oceaniradius_stylonematis
328 MY-----HAIVFLPLL GALIAGFGG----RALGAKACEYITSGFLVIAAILSWIALITVGF--
... SEAEPRTVQVM-RFIGSGNLDVNWAFRIDTLTVVMLVVVNTVSSLVHIYSIGYMHHDPH-----
... RPRFFAYLSLFTFAMLMLVTADNLVQMFFGWEGVGLASYLLIGFWYKKASANNAAMKAFIVNRVGDGFGFILGIF
```

```
328... GVFLVFGSVNL--
... DTIFANAAAFASVDFRFLWMDLTAGEALTVVCLLLFLGAMGKSAQFMLHTWLPDAMEGPTPVSALIHAATMVTA
... GVFMVARLSPIFEFSPDALTVVTIVGAITAFFAATVGLVQNDIKRVIAYSTCSQLGYMFVALGVGAYGAAMFHL
... FTTHAFFKALLFLGAGSVIHAVSDEQDMRKMGGRLKHIPMTYWMMIIGTIALTGVGIPGTIYIG-----
... TAGFFSKDAIIESAFVGHNAAGFAFGMLLIAAVMTSFYSWRLIFMTFHGKPR--ATADVMHHV-----
-----
... HESPPVMLVPLYILAVGALLSGFFFYSAFVGH--GHHEYNDFF--
... RTALFAGPDNHILEEFHEVAFVWKASPAVAMLIGLVTAWYMYIRS-----
-----
... PETPAALARQHRGLYQFLLNKWYFDELYDFLFVNPARKLGTFLWKR--GDGWLIDGFGPNGVA--
... KRVTDVTGRVVRLQSGLYHYAFAMMIGLAALITWMLGGAL-----
329 >WP_094078056_NuoL_Notoacmeibacter_marinus
330 MF-----HLIVFLPLIGFLIAGLFG----RSIGAKASEYLTGGLLYVSAVLSWIAFFDFGL--
... GHEEAMVVPVM--TWMNVGSLAVDWSFRIDTLTVVMLVVVNTVSALVHTYSIGYMHDPH-----
... RPRFFAYLSLFTFAMLMLVTSNLLQMFFGWEGVGLASYLLIGFWYKKPSANAAAMKAFIVNRVGDGFGFALGIF
... GIFLLFGSVNF--
... DTIFANARQFDPAGIDFFGYAVPAATAITATCLLLFMGAMGKSAQVPLHTWLPDAMEGPTPVSALIHAATMVTA
... GVVMVARLSPIFELSTTALVVVTVVGAITAFFAATVGLVQNDIKRVIAYSTCSQLGYMFVALGVGAYGAAIFHL
... FTTHAFFKALLFLGAGSVIHAVSDEQDMRYMGGRLKHIPATYWMMIIGTIALTGVGIPFTMIG-----
... TAGFFSKDIVIETAFASHSVSTFAFVMLVIAACFTSFYSWRLIFMTFHGTTPR--ATADVMHHV-----
-----
... HESPWMLAPLFLVLAAGALFAGVLFKEFFYGH--EYAE---FW--
... KEALFVAGGNELLEEFHHVPAWVALSPFIAMIVGLLVAYWFYIRS-----
-----
... PGMPKALAQSQSGLYKFLLNKWYFDELYDFLFVRPAMWLGRFLWKR--GDGTVIDGMGPDGIS--
... ARVVDITNRVVRLQSGLYHYAFAMLIGVAALVTWMLGSAL-----
331 >WP_170141804_NuoL_Ciceribacter_lividus
332 MILEY-----KAIVFLPLIGALIAGLLG----RQIGAKASEYITSGLMIVTAVLSWVVFVNVGF--
... GEGHEVIKVSVLRWVLSGIDVEVSLRIDTLTAVMLVVVNSVSTLVHVYSIGYMHDPH-----
... RPRFFSYLSLFTFAMLMLVTSNLLQMFFGWEGVGLASYLLIGFWFKKPSACAAAMKAFIVNRVGDGFGFILGIA
... GIFVLFGSINF--
... ETIFAAAQSYLPAEINLFGMSLDKAHAMTAVCLLLFMGAMGKSAQFLLHTWLPDAMEGPTPVSALIHAATMVTA
... GVFLVARMSPLFELSPNALTFTLIGAITAFFAATVGLVQNDIKRVIAYSTCSQLGYMFVALGVGAYGAAIFHL
... FTTHAFFKALLFLGAGSVIHAVDGEQDMRYMGGRLKHIPLTFWAMTIGTLALTGVGIPGTMIG-----
... FAGFFSKDVIIESAYASHSAVSGFAFTLLVIAALFTSFYSWRLAFLTFFGKPR--ASADVMHHV-----
-----
... HESPMVMLAPLALLALGAVFAGVAFEGYFFGH--EYGE---FW--
... KGALFTLPENEILEQFHGVPTWVKWSPFVAMLTGFVTAWYMYIKS-----
-----
... PSTPKVLAEQHRVLYQFLLNKWYFDELYDLLFVRSAKALGRFLWKK--GDVGVIDTYGPNVVA--
... AAVVDVTQRVVRLQSGLYHYAFAMLIGVAALITWMLGSSF-----
333 >WP_068082792_NuoL_Pseudovibrio_stylochi
334 MY-----SAIVFLPLVGLVGLFG----RALGAKASEFITSSLLVIAAILSWIAFFSVGF--
... GSTEKVQLEIL--QWISSGDLINWTIRVDLTLTAVMLVVVNTVSALVHIYSIGYMHDPH-----
... RPRFFAYLSLFTFAMLSLVTSNLLQMFFGWEGVGLASYLLIGFWFKKPSANAAAMKAFVNRVGDGFGFALGIC
... GIYILFGSIDY--
... DVIFQNVNSVAGQELTFLGTGLAADSAITVICLLLFMGAMGKSAQLLLHTWLPDAMEGPTPVSALIHAATMVTA
... GVFMVARLSPIFEYSHTALTVVTFVGATTAFFAGTIGCVQNDIKRVIAYSTCSQLGYMFAALGVGAYGAAV FHL
```

```
334... FTHAFFKALLFLCAGSVIHAVSDEQDMRRMGGLRKLIPVTYWTMFIGTLALTGFGIPLAHLGELYIGTAGFVSK
... DAIIESTFAGHNMFSQYAFWMTIIAAFLTSFYWRLLTFMTFHGKPR--ASVDVMKHV-----
...
... HESPLVMTMPLFILAFGALFAGMAFQSGFIGE--AYDA---FW--
... KGALFTGAENHVLHEMHHVPTWVKLSPFVMMVAGFLLAYQFYIRA-----
...
... PEMPCKLAERHDALYQFLLNKWYFDELYNFLFVKPSMKIGRFLWKR--GDGAVIDGLGPDGVA--
... SRVQKLSAQIVRLQSGYIYHYAFAMLIGVTFVTLMSFS----GGGAH--
335 >WP_068316307_NuoL_Pseudovibrio_hongkongensis
336 MY-----SAIVFLPLVGFLIAGLFG----RAIGAKASEYVTSSLLVVAALLSWVAFFDVAL--
... GTEALVQIPVL-QWISSGALDVTWTLRIDTLTVVMLVVNSVSALVHIYSIGYMHHDPH-----
... RPRFFAYLSLFTFAMLSLVTSDNLLQMFFGWEGVGLASYLLIGFWFKKPSANAAAMKAFVNVNRVGDGFGFLLGIF
... GYMMFGTISY--
... DDIFAQAGAIAGTLEFLGYSLSFDSAITVTCLLLFLGAMGKSAQLLLHTWLPDAMEGPTPVSALIHAATMVTA
... GVFMVARLSPLFELSHTALTVVTFVGASTALFAGTIGCVQNDIKRVIAYSTCSQLGYMFVALGIGAYGVAVFHL
... FTHAFFKALLFLCAGSVIHAVSDEQDMRRMGGLRKHIPVTYWTMFIGTLALTGFGIPLVHIGHTYLGTAGFISK
... DAIIEATYAGHNAASNFAFWMTIIAAFLTSFYWRLLTFMTFHGKPR--ASVDVMKHV-----
...
... HESPLVMTVPLFVLAVGALFAGMAFQSGFIGE--TYDT---FW--
... KGALFTGADNHVLHDMHHVPIWVKLMPFIMMVAGFLAVQFYIRK-----
...
... PDAPKLAERHDALYQFLLNKWYFDELYDFL FVKPSLKLGRFLWKR--GDGAVIDGMGPDGIA--
... ARVQQITAQVVRLQSGYIYHYAFAMLIGVAFFITLSMFS----GGGAH--
337 >WP_207140330_NuoL_Labrenzia_aggregata
338 MY-----SAILFLPLIGFLIAGLFG----RSIGAKACEYVTSGLVILAALLSWITFFGFWL--
... GGSELQVVELF--RMDAGDLKVSWSIRVDLTAVMLVVNTVSALVHVYSIGYMHHDPH-----
... RPRFFAYLSLFTFAMLSLVTADNLLQMFFGWEGVGLASYLLIGFWYQKPSANAAAMKAFVNVNRVGDGFGFALGIF
... GVFYLFQSIDF--
... TTIFNDAPSFIEEHLTFLGYHLDPHAAMTVVCLLLFMGAMGKSAQFLLHTWLPDAMEGPTPVSALIHAATMVTA
... GVFMVARLSPLMELSHTALAVIVFFGATTAFFAATVGLVQNDIKRVIAYSTCSQLGYMFVALGVGAYSIGIFHL
... FTHAFFKALLFLCAGSVIHAVSDEQDMRKMGGGLRKHIPITYWTMMIGTLALTGVGIPFTHLG-----
... FAGFISKDAIIEAAFAGAGGEHANPMALYGFWMTVISFYWRLLTFMTFHGKPR--APVDVMKHV-----
...
... HESPLVMTVPLFILSVGAALAGMVFYGSFYGE--GYAE---FW--
... KGALFNSETNHILHEMHHVPGWVKVSPFVMMVLGFVVAWVFYVRS-----
...
... PEMPQQLAQRHSGLYQFLLNKWYFDELYDFIFVRPALWIGRVLWKK--GDGTVIDGYGPNGIA--
... ARVQNVTAWVRLQTGYLYHYAFAMLIGVAALITWSMFTGAGTGGGAH--
339 >WP_055121168_NuoL_Labrenzia_alba
340 MY-----SAILFLPLIGFLIAGLFG----RAIGDKACEYLTSGLVILAALLSWITFFGFWL--
... GGSELQIEPLF--RMDAGDLKVMWSIRVDLTAVMLVVNTVSALVHVYSIGYMHHDPH-----
... RPRFFAYLSLFTFAMLSLVTADNLLQMFFGWEGVGLASYLLIGFWYKKPSANAAAIAKAFVNVNRVGDGFGFALGIF
... GIFFIFQSIEF--
... TTIFNDAPSFIEGQMTFLGYHLDPQAAMTVICLLLFMGAMGKSAQFLLHTWLPDAMEGPTPVSALIHAATMVTA
... GVFMVARLSPLMELSQTALTVIIFFGATTAFFAATIGLVQNDIKRVIAYSTCSQLGYMFVALGVGAYSIGIFHL
... FTHAFFKALLFLCAGSVIHAVSDEQDMRKMGGGLRKHIPITYWTMMIGTLALTGVGIPLTHLG-----
... FAGFISKDAIIEAAYASAGGEHANPMALYGFWMTVISFYWRLLTFMTFHGKPR--APVDVMKHV-----
...
... -----
```

```
340... HESPLVMTIPLFVLSAGAALAGMIFYSSFYGE-GYEA---FW--  
... KGSLFTSEANHVLHEMHSVPAWVKVSPFVMMALGFLVAYQFYIRS-----  
...  
... PETPKKLAERHQGLYQFLLNKWYFDEIYDFLIVRPTMWLGRVLWKK-GDGTVIDGYGPDGIS-  
... ARVQNVTSWVRLQTGYLYHYAFAMLIGVAALITWSMFTGAGTGGGAH-  
341 >MBD8891079_NuoL_Labrenzia_suaedae  
342 MY-----SAIVFLPLIGFLIAGLFG----RALGAKACEFITSGLVVVAALLSWVAFFSIGY--  
... GETNLVQVEVL-RWITIGALDVSWSLRIDTLTVVMLVVVNSVSALVHIYSIGYMHHDPH-----  
... RPRFFAYLSLFTFAMLSLVTSDNLLQMFFGWEGVGLASYLLIGFWFQKPSANAAAMKAFVVRVGDGFGFALGIF  
... GVFLVFDLIDL--  
... STIFAKAPAVIGAALNFLGYHLDHSAMTVVCLLLFMGAMGKSAQFLLHTWLPDAMEGPTPVSALIHAATMVTA  
... GVFMVARLSPLFELSHTALTVITFFGATTAFFAATVGLVQNDIKRVIAYSTCSQLGYMFVALGVGAYSVAVFHL  
... FTHAFFKALLFLCAGSVIHAVSDEQDMRKMGGRLKHIPVTYWTMFIGTVALTGVGIPFTHIG-----  
... FAGFISKDAVIEAAYAGHNAMAQYGFWLVFAAGLTSFYSWRLTFMTFHGKPR--ASVDVMKHV-----  
...  
... HESPLVMTAPLYILAVGATLAGMVFFGSFYGE-GYDA---FW--  
... KGALPSFEASHVLHAMHEVPGWVKVSPFVMMVGGFLVAYQFYIRS-----  
...  
... PETPKKLAEDFSGLYQFLLNKWYFDELYDFLIVRPAWVIGRQLWKK-GDGVVIDGYGPNVVA-  
... ARVQNVTTWVVKLQTGYLYHYAFAMLIGVAALITWSMFTGAGTVGGGAH-  
343 >WP_055455499_NuoL_Pannonibacter_indicus  
344 MY-----SAIVFLPLIGFLIAGLFG----RVIGHTASEYITSGLVIVSAVLSWIAFFTIGY--  
... GETALVEVEVL-RWISSGALNVAWSLRIDTLTVVMLVVVNTVSALVHVYSIGYMHHDPH-----  
... RSRFFAYLSLFTFAMLSLVTSDNLLQMFFGWEGVGVASYLLIGFWYKPSANAAAMKAFVVRVGDGFGFALGIF  
... GVFMFMTINL--  
... PEIFANAQAVVGGHLNFLGHPLDAHTAMTVVCLLLFMGAMGKSAQFLLHTWLPDAMEGPTPVSALIHAATMVTA  
... GVFMVARLSPLFELSHTALTVVTFGATTAFFAATVGLVQNDIKRVIAYSTCSQLGYMFVALGVGAYSIAVFHL  
... FTHAFFKALLFLCAGSVIHAVSDEQDMRKMGGRLKHIPFTYWTMFIGTLALTGVGIPLTHIG-----  
... LAGFLSKDLVIEAAYAASSGEHANAFALYGFWMTVVSFYSWRLTFMTFHGKPR--APVDVMKHV-----  
...  
... HESPMVMLAPLFILSIGAVLAGMVFYQSQFAGE-GYDA---FW--  
... KGALFTGAENHILHAIHEVPKWVKVSPFVMMVLGLATAWYFYIRS-----  
...  
... PETPKRLAAEHEGLYKFLNKWYFDELYNIIIFVRPAMWTGRQLWKK-GDGKVIDGYGPDGVA-  
... ARVQNVTSWVRLQTGYLYHYAFAMLIGVAALVTWSMFTGVLTTGGGAH-  
345 >WP_050473307_NuoL_Pannonibacter_phragmitetus  
346 MY-----SAIVFLPLIGFLIAGLFG----RVIGHTASEYITSGLVIVSAVLSWIAFFTIGY--  
... GETALVEVEIL-RWISSGALDVAWSLRIDTLTVVMLVVVNTVSALVHVYSIGYMHHDPH-----  
... RSRFFAYLSLFTFAMLSLVTSDNLLQMFFGWEGVGVASYLLIGFWYKPSANAAAMKAFVVRVGDGFGFALGIF  
... GVFMFMTINL--  
... PEIFANAQAVVGGHLNFLGHPLDAHTAMTVVCLLLFMGAMGKSAQFLLHTWLPDAMEGPTPVSALIHAATMVTA  
... GVFMVARLSPLFELSHTALMVVTFGATTAFFAATVGLVQNDIKRVIAYSTCSQLGYMFVALGVGAYSIAVFHL  
... FTHAFFKALLFLCAGSVIHAVSDEQDMRKMGGRLKHIPFTYWTMFIGTLALTGVGIPLTHIG-----  
... LAGFLSKDLVIEAAYAASSGAHANAFALYGFWMTLTSFYSWRLTFMTFHGKPR--APVDVMKHV-----  
...  
... HESPMVMLAPLFILSIGAVLAGMLFYQSQFAGE-GYDA---FW--  
... KGALFTGTENHILHAIHDVPKWVKVSPFVMMVLGLATAWYFYIRS-----  
...  
...
```

```
346... PETPKRLAAEHEGLYKFLLNKWFDELYNLI FVRPAMWIGRQLWKK-GDGKIIDGYGPDGIA-  
... ARVQNVTSWVRLQTGYLYHYAFAMLIGVAALVTWSMFTGVSTGGGAH-  
347 >WP_149891971_NuoL_Roseibium_aestuarii  
348 MY-----TAIVFLPLIGFLIAGLFG----RMIGPKASEIVTATLVTASAILSWVAFFTIGY--  
... GDTKLVQIEIM-RWISAGALDVTWIRVDTLTVVMLVVNSVSALVHWYSRGMHDDPH-----  
... RPRFFAYLSLFTFAMLSLVTSDNLLQMFFGWEGVGLASYLLIGFWFHKPSANAAAMKAFVNVNRVGDGFGFALGIF  
... GTFVLFDSIDL--  
... QTIFNQAIALGGQGFELGYHLDTHAAMTVVCLLLFMGAMGKSAQFLLHTWLPDAMEGPTPVSALIHAATMVTA  
... GVFMVARLSPLFELSHTALTVVTFFGATTAFFAATVGLVQNDIKRVIAYSTCSQLGYMFVALGVGAYSIGV FHL  
... FTHAFFKALLFLCAGSVIHAVSDEQDMRKMGGRLKHIPWTYWTMFIGTVALTGVGIPFTHIG-----  
... FAGFISKDAVIEAAYAGHNAMSQYAFWLTVAAGLTSFYSWRLTFMTFHGKPR--APVDVMSHV-----  
... -----  
... HESPWIMLFPLVLLSVGAVLAGMVFYGVFVGE-GFEH---FW--  
... KGAI FMGPENHILHAMHEVPGWVKVSPFVMMAGGFVVAYIFYLRK-----  
... -----  
... PDLPKKLAEQHSGLYQFLLNKWFDEAYDFL FVRPAKWLGRTLWKK-GDGTVIDGFGPNGIA-  
... ARVQNVTTWVVKLQTGYLYHYAFAMLIGVAALVTWSMFTGAGTG-GAH-  
349 >NBN77992_NuoL_Microvirga_tunisiensis  
350 MY-----QAI VFLPLIGFLIAGLFG----RAIGHTASELVTTTLVVISAVLSWVAFFQIGY--  
... GETALVQVEIL-RWITSGALDVAVSLRIDTLTVVMLVVNSVSALVHIYSIGYMHDDPH-----  
... RSRFFAYLSLFTFAMLSLVTADNLLQMFFGWEGVGLASYLLIGFWYQKSSANAAAMKAFVNVNRVGDGFGFALGIF  
... GVFMFDTINL--  
... SAIFANAPAVVGAVLDFLGYSLDAGTAMTVVCLLLFMGAMGKSAQFLLHTWLPDAMEGPTPVSALIHAATMVTA  
... GVFMVARLSPLFELSHTALTVVTFFGATTALFAATVGLVQNDIKRVIAYSTCSQLGYMFVALGVGAYSIGV FHL  
... FTHAFFKALLFLCAGSVIHAVSDEQDMRRMGGLRKHIPVPTYWTMMIGTLALTGVGIPLTYIG-----  
... FAGFISKDAVIEAAFAGHNAASQYAFWLTVAAGLTSFYSWRLTFLTFHGKPR--APVDVMKHV-----  
... -----  
... HESPMVMLVPLFILSVGAI AAGMAFKAPFFGD-GYDA---FW--  
... KGALFTGPDNHILHALHDV PKWVKVSPFVMMATGFIVAWYFYIRS-----  
... -----  
... PETPKRLAAEHEGLYKFLLNKWYIDELYDWIFVRPAMWLGRTLWKK-GDGVVIDGCGPDGVA-  
... ARVQNVTTWVRLQTGYLYHYAFAMLIGVAALVTWSMFSGVSTGGGAH-  
351 >WP_106753365_NuoL_Pannonibacter_carbonis  
352 MF-----QAI VFLPLIGFLIAGLFG----RAIGHKASELVSTLVVIAALLSWVAFFQIGY--  
... GETALVQIEIL-RWITSGTLDVSWSLRIDTLTVVMLVVNSVSALVHIYSIGYMHDDPH-----  
... RSRFFAYLSFFTFAMLSLVTADNLLQMFFGWEGVGVASYLLIGFWYQKPSANAAAMKAFVNVNRVGDGFGFILGIF  
... GVFMFDTINL--  
... STIFANAPAVVGVLNFLGYHLDAQS AITVVCLLLFVGAMGKSAQFLLHTWLPDAMEGPTPVSALIHAATMVTA  
... GVFMVARMSPLFELSTTALTVVTIFGATTAFFAATVGLVQNDIKRVIAYSTCSQLGYMFVALGVGAYSIGV FHL  
... FTHAFFKALLFLCAGSVIHAVSDEQDMRRMGGLRKHIPPTYWTMMIGTLALTGVGIPLTYIG-----  
... FAGFISKDAVIEAAFAGHNPA AQYAFWMTVVAAGLTSFYSWRLTFMTFHGKPR--APVDVMKHV-----  
... -----  
... HESPMVMLVPLFLLSVGAIASGMVFKPQFIGD-AYDA---FW--  
... KGALFTGPDNHILHAIHDV PKWVKVSPFVMMAGGFIVAWYFYIRS-----  
... -----  
... PETPKRLAAEQEGLYKFLLNKWYIDELYDWIFVRPAMWIGRMLWKK-GDGVVIDGCGPDGVA-  
... ARVQNVTTWVRLQTGYLYHYAFAMLIGVAALVTWSMFTGVSTGGGAH-  
353 >WP_189437262_NuoL_Pseudovibrio_japonicus
```

```
354 MF-----SAIVFLPLLGLFIVGMFG----NRLGVKASEYITSGFMIVAALLSWVFFFQYGL--
... GSETTEIVTIF-RWITSGDLAVNWTIRVDLTLAVMLVVVNSVSCLVHIYSIGYMHHDPH-----
... RPRFFAYLSLFTFAMLTAVTADDLLQMFFGWEGVGLASYLLIGFWYQKPSANAAAMKAFIVNRVGDGFGFALGIF
... GVIFYLYGSIDF--
... TSIFSSGPTLLEGLNLFGLFELMPEGALTVVCLLLFMGAMGKSAQFLLHTWLPDAMEGPTPVSALIHAATMVTA
... GVFMVARLAPVFELAPTAMAVVTFGATTAFFAATIGCVQNDIKRVIAYSTCSQLGYMFVALGVGAFGVGIFHL
... FTHAFFKALLFLCAGSVIHAVSDEQDMRKMGGRLRKHIPWTYWTMMIGTLALTGFGIPFIGIG-----
... TAGFVSKDAIIEAAYVGHNAFASYAYWATVIAALLTSFYSWRLVFMTFHGKPR--ASVDVMKHI-----
... -----
... HESPWMLIPLLLLISIGALFAGMVFKEAFMGH-DYGH---FW-
... KGVFGGTNSLAVIEEMHHVHMVALSPTLAMIGGFIVAYMFYIAK-----
... -----
... PDMPKVLAEHQPLYKFLLNKWFDELYDFLFVKPAMALGRFLWKR-GDGTIIDGLGPDGVA-
... SRVQQVTGWVRLQSGYIYHYAFAMLIGVAFFVTLAMFSG----GGVH-
355 >WP_068001063_NuoL_Pseudovibrio_axinellae
356 MF-----SAIVFLPLLGLFIVGLFG----NRLGVKASEYITSGFMIVAALLSWVFFFQYGL--
... GSESTQIVTIF-RWITSGDLAVNWTIRVDLTLAVMLVVVNSVSCLVHIYSIGYMHHDPH-----
... RPRFFAYLSFFTFSMLALVTADDLLQMFFGWEGVGLASYLLIGFWYKKPSANAAAMKAFIVNRVGDGFGFALGIF
... GVIFYLYGSIDF--
... TTIFSSGPSLLENKLNFLGYELMPEAALTVVCLLLFMGAMGKSAQFLLHTWLPDAMEGPTPVSALIHAATMVTA
... GVFMVARLAPIFELAPTALTVVTFGATTAFFAATIGCVQNDIKRVIAYSTCSQLGYMFVALGVGAFGVGIFHL
... FTHAFFKALLFLCAGSVIHSVSDEQDMRKMGGRLRKHIPWTYWTMMIGTLALTGFGIPFTYIG-----
... TAGFISKDAIIEAAYVGHNMFATYAFWATVLAALTSFYSWRLVFMTFHGKTR--ASVDVMKHI-----
... -----
... HESPWMLVPLLLLALGAALAGMVFKEAFIGH-DYVH---FW-
... KNVFGGTSSLAVIEEMHHVHVLKLSPLWAMAGGFIIAYLFYIAK-----
... -----
... PDMPKALAQRHKPLYLFLLNKWFDELYDFLFVRPSMALGRFLWKR-GDGTVIDGLGPDGVA-
... ARVQQVTGWVRLQSGYIYHYAFAMLIGVAFFVTLAMFSG----GGVH-
357 >WP_093521060_NuoL_Pseudovibrio_ascidiaceicola
358 MF-----SAIVFLPLLGLFIVGMFG----NRLGVKASEYITSGFMIVAALLSWVFFFQYGL--
... GSESTQIVTIF-RWITSGDLSVNWTIRVDLTLAVMLVVVNSVSCLVHIYSIGYMHHDPH-----
... RPRFFAYLSFFTFSMLALVTSDDLQMFFGWEGVGLASYLLIGFWYKKPSANAAAMKAFIVNRVGDGFGFALGIF
... GVIFYLYGSIDF--
... TTIFSSGPSLLENKLNFLGYELMPEAALTVVCLLLFMGAMGKSAQFLLHTWLPDAMEGPTPVSALIHAATMVTA
... GVFMVARLAPIFELAPTALTVVTFGATTAFFAATIGCVQNDIKRVIAYSTCSQLGYMFVALGVGAFGVGIFHL
... FTHAFFKALLFLCAGSVIHSVSDEQDMRKMGGRLRKHIPWTYWTMMIGTLALTGFGIPFTYIG-----
... TAGFISKDAIIEAAYVGHNMFASYAFWATVLAALTSFYSWRLVFMTFHGKTR--ASVDVMKHI-----
... -----
... HESPWMLVPLLLLALGAAFAGMVFKEAFIGH-DYLH---FW-
... KNVFGGTNSLAVIEEMHHVHVLKLSPLWAMAGGFIIAYLFYIAK-----
... -----
... PDMPKALAERHKPLYLFLLNKWFDELYDFLFVKPSLALGRFLWKR-GDGTVIDGLGPDGVA-
... SRVQQVTGWVRLQSGYIYHYAFAMLIGVAFFVTLAMFSG----GGVH-
359 >WP_00803949_Bartonella_tamiae
360 MF-----YAIIVFLPLLGLFIAGLGG----KTLGVRGAELVTCTFMVIVAVLSWIAFFNIAI--
... GNGSVVNPVL-HWLSVGNLSFNWSLHIDTLAVMLVVVNTVSALVHIYSIGYMHHDPH-----
... RPRFFAYLSFFTFMMLMLVTANNLIQMFFGWEGVGLASYLLIGFWFQRPSSANKAAIKAFVNRVGDGFGFLLGIF
```

```
360... SIFVLKAVDF--
... ETIFQKATDDSFVQMTFLSWHL DANIAL TVTCLLLFVGAMGKSAQFLLHTWLPDAMEGPTPVSALIHAATMVTA
... GVFMISRMSPIFELSTIALTVIVVIGATTAFFAATVGLVQNDIKRVIAYSTCSQLGYMFVALGVGAYGAAVFHL
... FTHAFFKALLFLGAGSVIHAVSDEQDMRKMGGRLRKYIPTTYWMMLIGTFALTGLGIPGTIFG-----
... TAGFFSKDSIVESAFASYNPAAGYAFWLLVIAALFTSFYSWRLIFMTFFHGKPR--ATADVMHHV-----
-----
... HESSAVMLIPLFVLAIGALFAGVIFQPYFFGD-LYIG---FW--
... KGALFTGPENHIMHEAHNVPMWVKTSPFIAMVIGFIFAYLFYILA-----
-----
... PSIPKALANAFPGYRFLKWKYFDELYNVLFVRPTFALGRFFWKV-GDIAIIDGLGPNGIA-
... ARVVNITNRVVRMOTGGLYHYAFAMLLIGVAALITWMMIGSIN-----
361 >WP_108004655_NuoL_Mycoplana_dimorpha
362 MDTII----KAI VFLPLIGFLIAGLGG----NTIGAKASEYVTSGFLVIACALSWLVFFQVAL--
... GEEELIKVPVL-HWIQSGSFDVEWAFRVDTLTAVMFVVVNTVSMLVHIYSIGYMHDPH-----
... RPRFFAYLSLFTFAMMLITADNLLQLFFGWEGVGLASYLLIGFWYKKASANAAMKAFIVNRVGDGFGFLGIA
... AVFVLFGSINF--
... ETIFATAATYLP AEITLFGMPLDKADALTGACLLL FVGAMGKSAQFLLHTWLPDAMEGPTPVSALIHAATMVTA
... GVFLVARMSPLYELSPDALTVVTIVGAITAFFAATVGLVQNDIKRVIAYSTCSQLGYMFVALGIGAYGAAIFHL
... FTHAFFKALLFLGAGSVIHAVDGEQDMRYMGGRLRTHIPVTFWMMTIGTLALTGVGIPGTMIG-----
... FAGFFSKDAIIESAFASHSAVSNFAFILLVVAALFTSFYSWRLAFMTFFGRPR--ASSDVMHHV-----
-----
... HESPAVMLVPLYILAVGAI FSGFIAVEYFYGH-HYEE---FW--
... QGAIFTGVENKLIIEFHVPLWVKWSPFVAMALGLFTAWMYIRR-----
-----
... PDLPKYLAEQHRGLYQFLLNKWYFDELYDFLFVRPALWLGRLFWKG-GDGAVIDRLGPNGLA-
... ARVLDVTDTRVRLQTGGLYHYAFAMLLGIAALVTWMMLGSSI-----
363 >WP_18348086_NuoL_Martelella_radicis
364 MIY-----KLIIFLPLLGFLIAGLFG----NRIGAKATEWVTIAFMAVAAILSWYVFISVGF--
... LSHAEDLVIQVMQWISSGDIDVAWSLRIDTLTAVMLVVVNTVSCLVHLYSVGYMHDDPH-----
... RPRFFAYLSLFTFAMLSLVTSDNLLQMFFGWEGVGLASYLLIGFWYKKPSACAAAMKAFIVNRVGDGFGFLGIA
... GLFFLAHTINF--
... DPIFAAAERIANHLHFLGMDLTLMHAITAICLLL FVGAMGKSAQFLLHTWLPDAMEGPTPVSALIHAATMVTA
... GVFLVARMSPLFELSPSALTFTLIGSITALFAATIGLVQNDIKRVIAYSTCSQLGYMFAALGAGAYGAAVFHL
... FTHAFFKALLFLCAGSVIHAVSGDQDMRRMGGRLRKHIPITFWGMIFGTLAITGVGIPGTIVIG-----
... AAGFFSKDAIIEAAFVSASPLANFSFWALVIAAVLTAFYSWRLIFMTFFGKPR--ASSDVMHHV-----
-----
... HESPWMLIPLIVLSVGALFAGVVFAEFFYGH-HYAE---FW--
... KGALFTGPHNEVLEHHHVALWVKLSPFFAMLLIGTVVAIYMYLIK-----
-----
... PASAPAMARAFPRIYAFLLNKWYFDELYDFLFVRPAKKGHFLWQK-GDVGVIDRFGPNGIA-
... ALVVDVTNRVVKLQSGYVYHYAFAMLLIGVAALVTWMMLGAL-----
365 >WP_045681980_NuoL_Martelella_endophytica
366 MIY-----KLIIFLPLIGFLIAGLFG----NRIGAKATEWLTITLMAIAAVLSWYVFISVGF--
... LQHEEGYVLHVMQWINSGGINATWSLRIDTLTAVMLVVVNTVSCLVHLYSVGYMHDDPH-----
... RPRFFAYLSFFTFAMLSLVTADNLLQMFFGWEGVGLASYLLIGFWYKKPSACAAAMKAFIVNRVGDGFGFLGIA
... GLFFLAHTIEF--
... DPIFEAARNLADNHLHFLGMNLDVMQATTAICLLL FVGAMGKSAQFLLHTWLPDAMEGPTPVSALIHAATMVTA
... GVFLVARMSPVFELSPTALTFTITLVGSITAFFAATVGLVQNDIKRVIAYSTCSQLGYMFAALGAGAFGAGVFHL
```



```
366... FTHAFFKALLFLCAGSVIHAVSDEQDMRRMGGLRKHIPVTFWAMVIGTLAITGVGIPFTEIG-----  
... AAGFFSKDAIIESAYVSASPLASFSFWMLVIAAAFTAFYSWRLIFMTFFGKPR--ASSDVMHHV-----  
...  
... HESPWIMLTPLVILSVGALFAGVVFLPYFFGH-DYSE---FW--  
... KGALFTGPHNEVLDEHHHVPAAVVKLSPFIAMLLGTVTAIYMYLIN-----  
...  
... PSSAPKLAQTFPRLYAFLLNKWYFDELYDFLFVRPSKRLGYFLWQK-GDVGFIIDRYGPNGIA-  
... SLVSDITDRVVKLQSGYVYHYAFAMLIGLAALVTWMLGGAL-----  
367 >WP_138748498_NuoL_Martelella_lutilitoris  
368 MIY-----KLIIFLPLLGLIAGLFG----NRIGAKATEWVTIAFMVVAAILSWYVFISVGF--  
... LSHAEDLVIQVMQWISSGDIDVAWSLRIDTLTAVMLVVNTVSVCLVHLYSVGYMHDDPH-----  
... RPRFFAYLSLFTFAMLSLVTSDNLLQMFFGWEGVGLASYLLIGFWYKKPSACAAAMKAFIVNRVGDGFGFLLGIA  
... GLFFLAHTINF--  
... DPIFAAAERIADDHLHFLGMDLTMHAITAICLLLFMGAMGKSAQFLLHTWLPDAMEGPTPVSALIIHAATMVTA  
... GVFLVARMSPLFELSPSALTFTVTLIGSITALFAATIGLVQNDIKRVIAYSTCSQLGYMFAALGAGAYGAAV FHL  
... FTHAFFKALLFLCAGSVIHAVSGDQDMRRMGGLRKHIPITFWGMIFGTLAITGVGIPGTVIG-----  
... AAGFFSKDAIIEAAFVSASPLAGFSFWALVIAAVLTAFYSWRLIFMTFFGKPR--ASSDVMHHV-----  
...  
... HESPWMLIPLIVLSVGALFAGVVFAEFFYGH-DYSE---FW--  
... KGALFTGPHNEVLEEHHHVALWVKLSPFFAMLIGTAVAIYMYLIK-----  
...  
... PSSAKATAKAFPRIYAFLLNKWYFDELYDFLFVRPAKKGHFLWQK-GDVGVIDRFGPNGIA-  
... ALVVDVTNRVVKLQSGYVYHYAFAMLIGLAALVTWMLGGAL-----  
369 >WP_075697151_NuoL_Pseudovibrio_brasiliensis  
370 MF-----SAIVFLPLLGLIIVGLFG----NRLGVKASEYITSGFMIVAALLSWVFFQYGL--  
... GSESTQLITIF-RWITSGDLSVNWITRVDLTLTAVMLVVNSVSVCLVHIYSIGYMHDDPH-----  
... RPRFFAYLSLFTFAMLTAVTADDLLQMFFGWEGVGLASYLLIGFWYQKPSANAAAMKAFIVNRVGDGFGFALGIF  
... GVIFYLYGSIDF--  
... TSIFASGPSLLENKLNFLGYELMAEPALTVVCLLLFMGAMGKSAQFLLHTWLPDAMEGPTPVSALIIHAATMVTA  
... GVFMVARLAPIFELAPTAMTVVTFGATTAFFAATIGCVQNDIKRVIAYSTCSQLGYMFAALGAGAYGAAV FHL  
... FTHAFFKALLFLCAGSVIHAVSDEQDMRKMGGGLRKHIPWTYWTMMIGTLALTGFGIPG-LAG-----  
... TAGFVSKDAIIEAAYVGHNAFASYAYWATVLAALLTSFYSWRLVFMTFHGKPR--ASVDVMKHI-----  
...  
... HESPWMLVPLILLSIGALFAGMAFKEAFMGH-DYAH---FW-  
... KDVFVGGTNSLAVIEEMHHVHVLVAWSPTFAMITGFIIAYVFYIAK-----  
...  
... PDMPKALAERHQPLYKFLLNKWYFDELYDFLFVKPAMALGRFLWKR-GDGTVIDGLGPDGIA-  
... SRVQVVTGWVRLQSGYIYHYAFAMLIGVAFFVTLAMFSGGGVH-----  
371 >WP_046478826_NuoL_Ca._Filomicrobium_marinum  
372 MI-----LAIVFLPIVGALIAGLFG----RFIGARASEFITGLLIIAAVLSWVAFVRVGF--  
... DAETARVPM--RWITSGELDIAWSLRIDTLTAVMLVVVTTVSALVHVYSIGYMHEDPS-----  
... RSRFFAYLSLFTFAMLMVTSNLLQMFFGWEGVGLASYLLIGFWYTKPEANAAAIKAFVNRVGDGFGFMLGMF  
... GLFFVFNTLNF--DPLFEATAQAAGKS---  
... FNFLGYEVDILTTLCLLLFMGAMGKSAQFLLHTWLPDAMEGPTPVSALIIHAATMVTAGVFMVARLSPIFEYAPT  
... ALEVVTLVGTVTAFFAATVGLVQNDIKRVIAYSTCSQLGYMFAALGAGAYSVGIFHLFTHAFFKALLFLGAGSV  
... IHAMHHEQDMRNMGGLAGKIPITWAMMIGTLALTGVGIPH-VAG-----  
... FAGFHSKDAIIEATFAAHTPGNFVFWVLV-FTAFLTAFYSWRLVFMTFHGKTR--AAPDVFKHA-----  
...  
... -----
```

```
372... HESPWVMLVPLFVLAFGAVVAGVFVFPYFIGE-SYAE---FW--  
... GKALFTAPSNHILHDMHHVEEWVYWAPFLAMASGFALSWIFYVQA-----  
...  
... PWLPEATARTFRPIYLFLLNKWFDELYNWL FVRS AKGLGRFLWKA-GDGAVIDGTI-NGTA-  
... DSVQWTTGRVVKLQSGYIYHYAFAMLIGVALILTYFLRGLVMTGGAGQ-  
373 >WP_111433419_NuoL_Rhodobium_orientis  
374 MY-----SAIVFLPLLGLIAGLFG----RIIGDKASEYITSGLLVVSCLLSWIAFFSVGY--  
... GDGPVEQVPIA-TWITSGALSIDWSLRIDTLTVVMLVVTTISALVHIYSIGYMHHDPS-----  
... RARFFAYLSLFTFAMLMLVTADNLLQMFFGWEGVGLASYLLIGFWYHKPSANAAAMKAFIVNRVGDGFGSLGIF  
... ALFALTGSIGL--DAVFAAAGDLQETT---  
... FLFLSWDVNALTVICLLLFMGAMGKSAQFLHTWLPDAMEGPTPVSAL IHAATMVTAGVFMVARLSPLFELSHT  
... ALTVVVVIIGATTAFFAATVGLVQNDIKRVIAYSTCSQLGYMFVALGVGAYGAGIFHLFTHAFFKALLFLSAGSV  
... IHAVSDEQDMRKMGLRNHIVPTFMMIIGTLALTG--FPL-----  
... TAGFFSKDAIIESSFVGHGAAAEYAFWMVIAALFTSFYSWRLIFMTFFGKPR--ASAEVMGHV-----  
...  
... HESPRVMTVPLMILALGALAAGVLFAGSFIGE-GYGE---FW--  
... KTALFVSEENHILHEMHNVPLWVKFAPFVMMVAGFVIAFYFYIMS-----  
...  
... PETPKKLAKQHDGLYQFLLNKWFDELYDVL FVRS AKWLGRFLWKQ-GDGRVIDGYGPDGVS-  
... ARVLQATGWVRLQTGYLYHYAFAILIGVAALITWAMFTGGGAN-----  
375 >WP_018698215_NuoL_Amorphus_coralli  
376 MY-----AAIVFLPLIGFLVAGIFG----RLIGARASEIVTTSLLFVSAILS SWAFI HVGF--  
... SDVEPIKVPLM-PWITSGALEIDWSLRVDTLTVVMLIVVTSVSSLVHLYSIGYMSHDPD-----  
... RPRFFAYLSLFTFAMLMLVTADNLLQMFFGWEGVGLASYLLIGFWYTRPSAVAASIKAFV VNRVGDGFGMLGIF  
... ALFMLVGSVDL--DTIFGHGEELSTTT---  
... FSFLGYQVNAVETICFLFIGAMGKSAQLGLHTWLPDAMEGPTPVSAL IHAATMVTAGVFMVARMSPLFEYAPA  
... ALTFVTFIGATTAFFAATIGCTQNDIKRVIAYSTCSQLGYMFAALGVGAYSAGIFHLMTHGFFKALLFLCAGSV  
... IHAMHDEQDMRKMGLVKKIPLTYAGMVIIGTLAITG--FPY-----  
... TSGYFSKDAIIEATFAAHNPFSAFWLTTLAALLTAFYSWRLIFMTFHGKTR--ASADVFKHA-----  
...  
... HESPPVMLIPLAVLSCGALFAGFILHGYFIGH-EYEH---FW--  
... RGSLYLGAENHILHDMHHLPAWVPLAPTVMITGVAWAYWWYMLS-----  
...  
... PKTPAAVAREHPALYQFLLNKWFDELYDFL FVRPTKRIGHFLWKK-GDGWLIDGFGPDGVS-  
... HRVLDVTQRVRLQTGYIYHYAFAMLIGVAALVTWAMMTGVGAP-----  
377 >WP_132035152_NuoL_Aquabacter_spiritensis  
378 MY-----HAIVFLPLIGFLIAGLFG----RSIGARASEVVTTSLFLIACLLAWIAFFNVGF--  
... GGHDTRVQVM--HWMYVGD LKIDWAFRIDTLTAVMLIVVTTVSSLVHLYSMGYMHEDPS-----  
... RPRFFAYLSLFTFAMLMLVTADNLLQMFFGWEGVGLASYLLIGFWY EKPSANAAAMKAFV VNRIGD GFGFILGIF  
... GVFVMTGAVNF--ETVFAQAPGLAGKT---  
... IAFLGHHWDAPTVIAVLLFIGAMGKSAQFLHTWLPDAMEGPTPVSAL IHAATMVTAGVFMVARMSPIFELSPS  
... ALDLVMIVGATTSMFAATIALVQTDIKKVIAYSTCSQLGYMFVAMGAGAYSIGMFHLLTHACFKALLFLSAGSV  
... INAMHHEQDMRNMGLLYKKIPFTYAMMLVGT LAITG--FPF-----  
... LAGYYSKDAIIE SAWGSTNSFALYGVMTVGAAALTSFYSWRLVFLTFHGQPHD-HHHYEAA-----  
...  
... HESPLVMTIPLGVLGFGSVVSGMILYPEFVGH-DVGE---FF--  
... RQSI FMGAENHVLHAMHDIPFWAKWMP TLMMALG LLVAYWFYVVD-----  
...  
...
```

```
378... RTLPVRLAHSQDALYKFLLNKWFDEIYDFLFVRPALFIGRVLWKQ-GDVRIIDGMGPDGVS-
... ARVLDVTGRVVRLQSGYLYHYAFVMLIGVAALITWFMFAGV-----
379 >WP_209483414_NuoL_Xanthobacter_flavus
380 MY-----QAIVFLPLLGLIAGLFG----KKIGDRASEVVTTSFLFVACLLAWIAFFAVGF--
... GDHDTRVQVM--KWIYVGDLDKVDWAFRIDTMTVIMLIVVTTVSSLVHLYSIGYMHEDEPS-----
... RPRFFAYLSLFTFAMLMLVTADNLLQLFFGWEGVGLASYLLIGFWYKPSANAAAMKAFVNVNRVGDGFGMLGIF
... AIFVMTGSIAF--EEVFAAAPGLAGKT---
... ISFLGHNWDAPTVIALLLFVGACGKSAQFLHTWLPDAMEGPTPVSALIIHAATMVTAGVFMVARMSPIFELSQT
... ALNVVMLVGATTAFFAATVGLVQNDIKKVIAYSTCSQLGYMFVAMGAGAYSIGMFHLLTHAFFKALLFLGAGSV
... IHAMHHEQDMRHMGGRLKKIPFTYWTMVIIGTLAITG--FPF-----
... LAGYYSKDAIIEAAYASHNYFHVYGYWMTVIAAALTAFYSWRLIFLTFWGHPHD-HHHYEAA-----
... -----
... HESPLVMTIPLGVLSLGFALFAGIAFKNIFVGE-GVEH---FF--
... RHSIFMGAENHILHAMHDIPGWAAPVMMVVGSLFAIWFYIVN-----
... -----
... PKVPAQLAKSQDALYQFLLNKWFDEIYNFLFVRPTLWLGRTLWKR-GDGTIIDGLGPDGVS-
... ARVLDITRGVVRLQTGYLYHYAFVMLIGVAALITWFMFAGV-----
381 >WP_213363409_NuoL_Ancylobacter_defluvii
382 MY-----QAIVFLPLAGFLIAGLFG----RAIGARASELITTGLLFISALFAWIVFFQTAF--
... GDGGGTVEIF--TWIASGALDVKWALRVDTLTAVMLVLVTTVSSLVHLYSMGYMHEDEPS-----
... RPRFFAYLSLFTFAMLMLVTSNLLVQLFFGWEGVGLASYLLIGFWYDKPSACAAAMKAFIVNRVGDGFGFALGIF
... AVFMMTGSVGF--EQVFAAAPSLMDKT---
... IHFIGIDWHAPTIICLLLFIGAMGKSAQLGLHTWLPDAMEGPTPVSALIIHAATMVTAGVFMVARLSPLFELSPV
... ALNVVMFVGASTAMFAATVGCVQNDIKRVIAYSTCSQLGYMFTALGAGAYSVGVFHLFTHGFFKALLFLAAGSV
... IHAMHHEQDMRHMGGRLWRKIPFTYATMLIGGLALTG--FPF-----
... TAGYFSKDAIIEAAYAFMSHSPFSTYAFVMTVAAAALTSFYTWQMFMTFHGHPHD-HHHYEHA-----
... -----
... HESPLTMLIPLGVLSLGFALFAGMILYPYFVGH-DVEH---FF--
... REAIFMGPDNKILEEIHHPAWAKWSPTVMMVLGFVVAYWMYVAN-----
... -----
... PAVPKALARRNDVLYRFLLNKWFDELYDFLFVRPTMWLGRFLWKQ-GDGRVIDGWGPNGIS-
... ARVIDVTNRVVRLQTGYLYHYAFVMLVGVAAALITWFMFGGAH-----
383 >WP_086090017_NuoL_Pseudorhodoplanes_sinuspersici
384 MY-----QAIVFLPLIGCLIAGLFG----RIIGARPAELVTLLLFASAALSWYAFARVGF--
... GHIDERIVLF--PWIQSGDFKVDWVIRVDTLTAVMLVVTTVSSLVHLYSIGYMHEDEPH-----
... RQRFFAYLSLFTFAMLALVTADNLAQLFFGWEGVGLASYLLIGFWYQKPEANAAAIKAFVNVNRVGDGFGFALGIF
... ALFMMTGAIDF--DTIFAQAPALTGKT---
... IDFFGWHADALTLICLMLFMGAMGKSAQFLHTWLPDAMEGPTPVSALIIHAATMVTAGVFMVARLSPLFELAPV
... ALMVVTLIGATTAMFAATVGLVQNDIKRIIAYSTCSQLGYMFVAMGVGAWSVGMYHLFTHAFFKALLFLGSGSV
... IHAMHHEQDIRHMGGRLKNIPLTYWLMIIIGTLALTG--FPF-----
... TAGYFSKDAIIEAAYAGKNPFAVYGFACVLAALTSFYSWRLIFKTFHGEPHD-RHHYEEA-----
... -----
... HESPMVMLVPLMVLAAGSILAGYPFYEFAGH-HVEE---FF--
... RNSLAFSKTNTILEDMMHVPALVVWTPVMMVLGFIAIAYLFYIRD-----
... -----
... PRIPVEMARNHQLLYRFLLNKWFDELYDLIFVRPAKWLGTTLWKR-GDGWLIDGFGPDGVS-
... ARVLDVTRNVVRLQTGYLYHYAFAMLIGAAALITWFMFAGAH-----
385 >WP_109919883_NuoL_Zavarzinia_compransoris
```

```
386 MI-----AAIVFLPLLGA VIAGFFG----RLIGARGAQIVTSTLLVVAAVLSWVTFQVT----
... GHEGGAYKMRLMTWVLSGAFEVDWAFRVDLTAVMLVVVTSVSSLVHIYSVGYMAEDPH-----
... IPRFHAYLSLFTFAMLMLVTADNFLQVFFGWEGVGLASYLLIGFWYKKPSANAAAIAKAFVNVNRVGDGFGFALGIF
... AIFLVFNSVSF--DTVFAAAAGKAGQT----
... FNFLGYDVDIMTTICLLL FVCGMGKSAQLGLHTWLPDAMEGPTPVSAL IHAATMVTAGVFLVARASPLFEFAPS
... ALAVVTVVGATTAFFAATVGLVQNDIKRVIAYSTCSQLGYMFFAAGVGAYEAAVFHLFTHAFFKALLFLGAGSV
... IHAMHHEQDMRNMGGT WKYIKFTYAMMWIGNLALA--GVPF-----
... FAGFYSKDMVLEVAYAAHSGVGT YAFWLGI IAA SFTAFYSWRLLFLT FHG EKRW--GGHGH--GHGHDDHGHG----
... -----HGHAHTP-----
... HESPLAMTIPLALLAVGAVFSGFWFYDSFVGE--HREA---FW--
... GGAI FVAEANKVIEHAHHPGWVKLLPLIVTAGGIFVAWVFYILK-----
... -----
... PKWPDQLAKTHREAYAFLLNKWYFDELYDLLFVKGARLFGRVFWKQ--GDGAVIDGLGPNGIS--
... ARVLDIARRAAKLQSGFVYHYAFAMLIGVALLVTWYVYRMGVTP-----
387 >WP_119778097_NuoL_0leomonas_sp._K1W22B-8
388 MI-----AAIVFLPLLGA IIVGFFG----RRLGNRGAQVITSGFLVVAAVLSWITFFQAT----
... GHATDEPLKVHLTWMLSGSLEVEWAFRIDALTAVMLVVVNTVSSLVHIYSAGYMEEDPH-----
... IPRFQAYLSLFTFAMLMLVTADNFVQVFFGWEGVGLASYLLIGFWYKKPSANAAAIAKAFVNVNRVGDGFGFALGIF
... AIFFFVNSVSF--DTVFAAAAGETGKT----
... FNFLGYDVDILTITICLLL FVCGMGKSAQLGLHTWLPDAMEGPTPVSAL IHAATMVTAGVFLVARCSPLFEHAPV
... ALEVTVIGASTAFFAATVGLVQNDIKRVIAYSTCSQLGYMFFAAGVGAYEASIFHLFTHAFFKALLFLGAGSV
... IHAMHHEQDMRNMGGLWRHIKLT YALMWIGNLALA--GIPL-----
... FAGYYSKDTILEVAFAAHTGVGT YAYILGTLAAMMTAFYSWRLLFMTFHGEARW--GHGH--GHG--DHGHGD----
... -----HGHAHTP-----
... HESPLVMTIPLIVLALGAAAAGIIFDDFVGH--HREA---FW--
... GGAI FVAETNKVLEEAAHHP EWAALLPLVLSVFGIFLAWVFYIAR-----
... -----
... PKWPAALAQTHKELYAFLLNKWYFDELYDLLFVRPAKAI GRLLWKG--GDGRIIDGLGPDGIS--
... ARVLDIARRAVKLQSGFVYHYAFAMLIGVAALVSWYVYRIGVTP-----
389 >WP_091859036_NuoL_Bosea_robiniae
390 MY-----HAIVFLPLIGFLIAGLFG----RLIGARGSEIVTTSLLMVSAALSWVALTQVGF--
... GSGTTRVQVA--SWISSGELQVDWAFRVDLTAVMLVVVNTVSSLVHLYSIGYMHEDEH-----
... RSRFFAYLSLFTFAMLMLVTADNLVQMFFGWEGVGLASYLLIGFWYQKPSANAAAMKAFIVNVNRVGDGFGFLLGIF
... LIFVLFGAVTF--DAIFPRAGEMVSQS---
... FRFLGYDWNALTLTCLLLFMGAMGKSAQFL LHTWLPDAMEGPTPVSAL IHAATMVTAGVFMVARLSPVFEYAPV
... ALTVVVVIGATTAFFAATVGLVQNDIKRVIAYSTCSQLGYMFFVALGVGNYGAGIFHLFTHAFFKALLFLGAGSV
... IHAMHHEQDMRHMGLRKHIP LTAAMTIGTLALTG--FPG-----
... FAGYFSKDAVIESAYASVAHGGLASSYAFVLAAGMTSFYSWRLYFMTFEGAPRWGHGHDAHGHGHDDHAHAAD--
... -----GHDDHGHGH DHTP-----
... HESPWMLVPLAVLSLGAIVAGYAFKEAFIGH--DFEH---FW--
... KSALFMGKDNHILHAMHEV PKWVWSPFVAMVIGFALAWMYVRR-----
... -----
... PEIPGKLAAANPALYQFLLNKWYFDELYDFLFVRPAKW LGRFLWKK--GDGLVIDGFGPDGVS--
... ARVVDVTNRVRLQTGYLYHYAFAMLIGVAGLVTWYLVARG-----
391 >WP_079591299_NuoL_Bosea_thiooxidans
392 MY-----HAIVFLPLIGFLIAGLLG----RLIGARGSEIVTTSLLFVSAVLSWIALAQVGF--
... GSGTTRIQVA--NWISSGQLQADWAFRIDLTAVMLVVVNTVSSLVHLYSIGYMHEDPH-----
... RPRFFAYLSLFTFAMLMLVTADNLVQMFFGWEGVGLASYLLIGFWYQKPSANAAAIAKAFVNVNRVGDGFGFLLGIF
```

```
392... LIFVLFGAVTF--DAIFPRAGEFVNTS---  
... FRFLGYDWNALTLTCLLLFMGAMGKSAQFLHTWLPDAMEGPTPVSALIIHAATMVTAGVFMVARLSPVFEYAPV  
... ALTVVVVVGATTAFFAATVGLVQNDIKRVIAYSTCSQLGYMFVALGVGNYGAGIFHLFTHAFFKALLFLGAGSV  
... IHAMHHEQDMRHMGGRLKHIPLTAAAMTIGTLALTGVGIPGTI-----  
... FGFAGFFSKDAIIESAYASVATGGFASSVLLVVAACMTSFYSWRLYFMTFEGTPRWGHGHAHQGHDDHAHAHA  
... H--DDH-----GHDDHGHHTP-----  
... HESPWTMLLPLVLLSIGAIAAGFAFKEAFIGH-DFEH---FW--  
... KSALFMGKDNHILHAMHEVPKWVILSPFVAMVIGFLLAYWMYVRR-----  
...  
... PDIPGRLAAANPALYRFLLNKWFDELYDFLFVRPAKWLGFRFLWKK-GDGLIIDGFPGDGVS-  
... ARVVDVTNRVVRLQTGYLYHYAFAMLIGVAGLVTWYLVTRG-----  
393 >WP_066611767_NuoL_Bosea_sp._PAMC26642  
394 MY-----HAIVFLPLIGFLIAGLFG----RLIGARGSEIVTTSLLFVSAVLSWVAFFSVGF--  
... GSGTTRIQIA--TWMASGDLRVDWAFRIDTLTAVMLVVVNTVSCLVHLYSIGYMHEDEH-----  
... RPRFFAYLSLFTFAMLMLITSDNLVQMFFGWEGVGLASYLLIGFWYKKPSANAAAMKAFIVNRVGDGFGALGIF  
... LVFVLFGSVGF--DAIFPRVADLTNAT---  
... FHFVGRDWHALTLASLLLFMGAMGKSAQFLHTWLPDAMEGPTPVSALIIHAATMVTAGVFMVARLSPVFEYAPA  
... ALTVVVIVIGATTAFFAATVGLVQNDIKRVIAYSTCSQLGYMFVALGVGAYSAGIFHLFTHAFFKALLFLGAGSV  
... IHAMHHEQDMRNMGGRLKHIPLTAAAMTIGTLALTG--FPL-----  
... FAGYFSKDAIIESAYASVAHTGFPASYAFVVAACMTSFYSWRLYFMTFEGKPRWGADA-  
... HAGHGHDAHDDHAHAHAHDDNA-----HGDHGHGHAHTP-----  
... HESPLVMLVPLAVLSLGAVAAGFAFKEAFIGH-NYEH---FW--  
... KAALFTGKDNHILHEMHEVPGWVVASPFIAMVIGFLLSLYMYVLR-----  
...  
... PDVPGKLAANPALYKFLLNKWFDEIYDFLFVKPAMWLGKFLWKK-GDGFVIDGMGPDGIS-  
... ARVVDVTNRVVRLQTGYLYHYAFTMLIGVAGLVTWYLLARG-----  
395 >WP_103871693_NuoL_Bosea_lathyri  
396 MY-----HAIVFLPLIGFLIAGLFG----RLIGPRGSEILTTSLLVSAVLSWVALFNVGF--  
... GSGTTRIQVA--TWLASGDLRVDWAFRIDTLTVVMLVVVNTVSSLVHVYSIGYMAEDPH-----  
... RPRFFAYLSLFTFAMLMLVTADNLVQMFFGWEGVGLASYLLIGFWYQKPSANAAAMKAFIVNRVGDGFGFLGIF  
... LVFVLFGTVGF--ESIFPRVGELTTQT---  
... FRFLGYEWNALTLTCLLLFMGAMGKSAQFLHTWLPDAMEGPTPVSALIIHAATMVTAGVFMVARLSPVFEYAPV  
... ALTVVVVVGATTAFFAATVGLVQNDIKRVIAYSTCSQLGYMFVALGVGAYAPAIHLFTHAFFKALLFLGAGSV  
... IHAMHHEQDMRHMGGRLKHIPLTAAAMTIGTLALTG--FPF-----  
... FAGYFSKDAIIESAYAAVAHTGFAASYLLVVAACFTSFYSWRLYFMTFEGRPRWA-  
... GHGHEAHGHDDHAHAHAHGHDDH-----GHGHAHTP-----  
... HESPLSMLIPLALLSLGAVAAGFAFKEAFIGH-DYEH---FW--  
... KGALFTGKDNHILHAMHEVPGWVVASPFIAMVLGFVFALYFYVLR-----  
...  
... PDIPGKLAANPVLRYRFLLNKWFDEIYDFLFVKPSMWLGFRFLWKK-GDGLVIDGMGPDGIS-  
... ARVVDVTNRVVRLQTGYVYHYAFAMLIGVAGFVTWYLLARG-----  
397 >WP_114829996_NuoL_Bosea_caraganae  
398 MY-----HLIVFLPLIGFLIAGLLG----RLIGPRGSEIVTTSLLMVSAALSWVAFFQVGF--  
... GSGTTRIQIA--TWLASADLRVDWAFRIDTLTVVMLVVVNTVSSLVHLYSIGYMSDPH-----  
... RPRFFAYLSLFTFAMLMLVTADNLVQMFFGWEGVGLASYLLIGFWYQKPSANAAAMKAFIVNRVGDGFGALGIF  
... LVFVLFGTVAF--DGIFPKAGELVTQT---  
... FRFVGYEWNALTLTCLLLFMGAMGKSAQFLHTWLPDAMEGPTPVSALIIHAATMVTAGVFMVARLSPVFEYAPV  
... ALTVVVVIGATTAFFAATVGLVQNDIKRVIAYSTCSQLGYMFVAMGVGAYSAGIFHLFTHAFFKALLFLGAGSV
```

```
398... IHAMHHEQDMRKMGGLRKYIPLTAAAMTIGNLALTG--FPF-----  
... FAGYFSKDAIIESAYASVAHGGFASSVLLVVAACFTSFYSWRLYFMTFEGQPRWA--  
... GQGHDAHGHDAGHDDHAAHGH-----DDHGHGHDHDP-----  
... HESPWVMMIPLAVLALGAVAAGFVFKEAFIGH-DYEH---FW--  
... KAALFTGKDNHILHAMHEVPGWVWSPFVAMVLGFLVALYMYVLR-----  
-----  
... PDVPGKLAANPALYQFLLNKWYFDEIYDFLFVKPAMWLGKFLWKK-GDGFVIDGMGPDGIS--  
... ARVVDVTNRVRLQTFVYHYAFAMLIGVAGLVTWYLLARG-----  
399 >WP_114771645_Microvirga_subterranea  
400 MY-----HAIVFLPLVGFLIAGLFG----RILGARPSELITTGLLMVAAVLSWLAFFSVAY--  
... GDGATRIQVA--QWMSVGDLDVDWAFRIDTLTAVMLIVVNTVSALVHLYSIGYMHEDPH-----  
... RPRFFAYLSLFTFAMLMLVTADNLVQMFFGWEGVGLASYLLIGFWYQKDSANAAAMKAFIVNRVGDGFLGIF  
... TLFVLFNSVTF--DQIFPRVAELANNR---  
... FHFLGIEWHALTIACLLLFMGAMGKSAQFLLHTWLPDAMEGPTPVSALHAATMVTAGVFMVARLSPVFEYAPA  
... ALTVVTIIGGITAFFAATVGLVQNDIKRVIAYSTCSQLGYMFVALGVGAYSVGVFHLFTHAFFKALLFLGAGSV  
... IHAMHHEQDMRHMALRRYIPFTTAMMAIGTLALTG--FPF-----  
... TAGYYSKDAVIEAAYASHSTAGSFAFLATVIAAFMTSFYSWRLFFMTFEGSARWG--  
... HHGHDAHAPHDHEGVEHDARSRDVEPAHAQHDHSHDHGHGHAHTP-----  
... HESPLVMLVPLIVLATGALLAGIIFHGAFIGE-GYEE---FW--  
... KGAVFTRPDNHILEEMHHLPGWVPLLPTLMMILGFLAVYMYIID-----  
-----  
... SKQPAKLAADHPILYRFLLNKWYFDELYDAIFVRPAMAIGRFFWRT-GDQRIIDGLGPDGIS--  
... ARVLDVTRGVVRVQTGYLYHYAFAMLIGVAALVTFYLFVFRGAH-----  
401 >WP_183451382_NuoL_Microvirga_lupini  
402 MY-----HAIVFLPLVGFLIAGLFG----RVLGPRPSEIITTALLFVAAVLSWVSFIQVGF--  
... GDGATRIQIA--QWMSVGDLDVDWAFRIDTLTAMMLVVVNTVSALVHLYSIGYMHEDPH-----  
... RSRFFAYLSLFTFTMLMLVTADNLVQMFFGWEGVGLASYLLIGFWYQKDSANAAAMKAFIVNRVGDGFLGIF  
... TVFVLFNGVTF--DAIFPRVAEFADAK---  
... FHFLGIEWHALTIACLLLFMGAMGKSAQFLLHTWLPDAMEGPTPVSALHAATMVTAGVFMVARLSPIFEYAPA  
... ALTVVTVIGGITAFFAATVGLVQNDIKRVIAYSTCSQLGYMFVGLGVGAYGAGVFHLFTHAFFKALLFLGAGSV  
... IHAMHHEQDIRHMALRRYIPFTTAMMAVGTALTG--FPF-----  
... SAGYYSKDAIIEAAYAAHSSAGSFAFLATVVAAFMTSFYSWRLFFLTFEGSARWG--  
... HHDHHAHAPHSHEGVEHDDHNRDVEP---ASHAQHEHGHHGAHTP-----  
... HESPLVMLIPLLVAIGAVLAGIIFHGAFIGE-GYQE---FW--  
... KGALFTRPENHILEEMHHLPGWVPLLPTIMMVLGFLAWYMYIID-----  
-----  
... NKQPAKLAADHPILYRFLLNKWYFDELYDAIFVRPAMAIGRFFWRT-GDQRIIDGLGPDGIS--  
... ARVLDVTRGVVRVQTGYVYHYAFAMLIGVAALVTFYLFVFRGAH-----  
403 >WP_04718718_NuoL_Microvirga_vignae  
404 MY-----HAIVFLPLVGFLIAGLLG----RVIGARPSEIITTALLFVSAVLSWVAFIHVGF--  
... GEEP MIRVQVA--QWMSVGDLDVDWAFRIDTLTAMMLVVVNTVSALVHLYSIGYMHEDPH-----  
... RPRFFAYLSLFTFAMLMLVTADNLVQMFFGWEGVGLASYLLIGFWYKDSANAAAMKAFIVNRVGDGFLGIF  
... TIFVLFNGVTF--DAIFPRVGEFANAR---  
... FTFLGIEWHALTITCLLLLFMGAMGKSAQFLLHTWLPDAMEGPTPVSALHAATMVTAGVFMVARLSPVFEYAPA  
... ALTVVTVIGGITAFFAATVGLVQNDIKRVIAYSTCSQLGYMFVALGVGAYSAGMFHLFTHAFFKALLFLGAGSV  
... IHAMHHEQDMRNMGNLRRYIPLTTAMMAIGTLALTG--FPF-----  
... TAGYYSKDAIIEAAYASHSAAGSFAFLATVIAAFMTSFYSWRLFFMTFEGNARWGASHHHAPSDEGVEHDERG  
... HDVEPAGH----ADHEHGHHGHGAHTP-----
```

```
404... HESPLVMVPLIIVLAIGAVVAGIVFHDAFLGE-GHQE---FW--
... KGALFTGPNNHILEEMHHLPGWVPLLPTVMMILGFVLAYMYIVD-----
...
... AKQPARLAADHPILYRFLLNKWFDELYDAIFVRPAMAIGRFFWRT-GDQKIIDGLGPDGIS-
... ARVLDVTRGAVRLQSGYVYHYAFAMLIGVAALVTFYLFVFRGAH-----
405 >WP_203271756_NuoL_Microvirga_arabica
406 MY-----HAIVFLPLVGFLIAGLFG----RVLGPRPSEIITTALLFVAAVLSWVSFIQVGF--
... GDGATRQVA--QWMSVGDQLQVDWAFRIDTLTAMMLVVVNTVSALVHLYSIGYMHPEDPH-----
... RSRFFAYLSLFTFTMLMLVTADNLVQMFFGWEGVGLASYLLIGFWYQKDSANAAAMKAFIVNRVGDGFGFLGIF
... TVFVLFNGVTF--DAIFPRVAELANAN---
... FTFLGIEWHALTIACLLLFMGAMGKSAQFLHTWLPDAMEGPTPVSALHAATMVTAGVFMVARLSPIFEYAPA
... ALTVVTVIGGITAFFAATVGLVQNDIKRVIAYSTCSQLGYMFVALGVGAYSAGVFHLFTHAFFKALLFLGAGSV
... IHAMHHEQDMRHMALRRYIPLTTAMMAIGTLALTG--FPF-----
... TAGYYSKDAIIEAAYAASHSTAGSFATLVVAAFMTSFYSWRLFFLTFEGTARWG--
... HGHGHAHAHAPHSHEGVEHDDHNRDVEPASHAQHEHGHGDHTP-----
... HESPLVMLLPLIIVLAIGAVVAGIVFHNAFIGE-GYQE---FW--
... KGALFTRPENHILEEMHHLPAWVPLLPTVMMALGFVLAYMYIVD-----
...
... AKQPAKLAADHPILYRFLLNKWFDELYDAIFVRPAMAIGRFFWRT-GDQRIIDGLGPDGIS-
... ARVMDVTRGVVVRVQTGYVYHYAFAMLIGVAALVTFYLFVFRGAR-----
407 >WP_201834068_NuoL_Microvirga_zambiensis
408 MY-----HAIVFLPLVGFLIAGIFG----RLLGPRPSEIVTTALLFVAAVLSWVSFIQVGF--
... GDGATRIQIA--QWMSVGDQLQVDWAFRIDTLTAMMLVVVNTVSALVHLYSIGYMHPEDPH-----
... RSRFFAYLSLFTFTMLMLVTADNLVQMFFGWEGVGLASYLLIGFWYQKDSANAAAMKAFIVNRVGDGFGFLGIF
... TVFVLFNGVTF--DAIFPRVSEFANAR---
... FMFLGIEWHALTIACLLLFMGAMGKSAQFLHTWLPDAMEGPTPVSALHAATMVTAGVFMVARLSPLFEYAPS
... ALAVVTVIGGITAFFAATVGLVQNDIKRVIAYSTCSQLGYMFVGLGVGAYGAGVFHLFTHAFFKALLFLGAGSV
... IHAMHHEQDIRHMALRRYIPLTTAMMAIGTLALTG--FPF-----
... TAGYYSKDAIIEAAYAASHSSAGSFATLVVAAFMTSFYSWRLFFLTFEGTARWG-
... HHDHHAHAHAPHSHEGVEHDDHNRDVEPAS---HAQHDHGHGDHTP-----
... HESPLVMLIPLIVLATGAVIAGIVFHGAFIGE-GYQE---FW--
... KGALYTRPDNHILEEMHHLPGWVPLLPTIMMVLGFVLAWYMYIID-----
...
... NKQPAKLAADHPILYRFLLNKWFDELYDAIFVRPAMAIGRFFWRT-GDQKIIDGLGPDGIS-
... ARVLDVTRGVVVRVQTGYVYHYAFAMLIGVAALVTFYLFVFRGAH-----
409 >WP_183332122_NuoL_Chelatococcus_composti
410 MY-----HAIVFLPLAGFLIAGLAG----RFIGARASEVITTSGLFVSCALSWIAFFDVAF--
... GDGATRVTV--NWIISGDLAVDWAFRIDTLTAVMLIVVTTVSSLVHLYSIGYMHPEDPS-----
... RPRFFAYLSLFTFAMLMMLVTADNLVQMFFGWEGVGLASYLLIGFWYKPSANAAAIAKAFVNRVGDGFGFLGIF
... LLFVLFVAVTF--DGIFPRVAEFNEAT---
... FRFLGHEWHALTLACLLLFMGAMGKSAQFLHTWLPDAMEGPTPVSALHAATMVTAGVFMVARMSPVFEYAPT
... ALSVTVIGGITAFFAATVGLVQNDIKRVIAYSTCSQLGYMFVALGVGAYGAGVFHLFTHAFFKALLFLGAGSV
... IHAMHHEQDMRHMGLRKHIPFTAAMMTIGTLALTG--FPF-----
... TAGYFSKDAIIEAAYASHTPGANFAFIATVIAALFTSFYSWRLYFLTFEGKPRW-AGH-GHGHDD-----
... -----HGHGHGDHTP-----
... HESPLVMLIPLAVLAIGVVVAGFAFKEAFIGH-DYDN---FW--
... KGALFTGANNHILHEMHEVPGWVVASPFVMMVLGFLIALWFYVLN-----
...
... -----
```

```
410... PRMPAALAAQPLLRYFLLNKWYFDELYDFLFVVRPAMWLGRVFWKK-GDGWLDIDFGPDGVS-
... ARVVDVTNRVRLQGTGYVFHYAFAMLVGVAALVTWYLIGGTH-----
411 >WP_069691719_NuoL_Bosea_vaviloviae
412 MY-----HAIVFLPLIGFLIAGLFG----RLIGARGSEIVTTSLLVVSALSWIAFFQVGF--
... GHGTTTRVQIA--TWASGDLRVDWAFRVDLTLAVMLVVNTVSCLVHLYSIGYMHEDPH-----
... RPRFFAYLSLFTFAMLMVLTADNLVQMFFGWEGVGLASYLLIGFWYQKPSANAAAMKAFIVNRVGDGFGFALGIF
... LVFVLFSGVGF--DAIFPRVGDLSQS---
... FHFLGRDWHALTLASLLLFMGAMGKSAQFLHTWLPDAMEGPTPVSALHAATMVTAGVFMVARLSPIFEYAPV
... ALTVVVVIGATTAFFAATVGLVQNDIKRVIAYSTCSQLGYMFVALGVGNYGAGIFHLFTHAFFKALLFLGAGSV
... IHAMHHEQDMRNMGGLRKHIPLTAIAMTIGTLALTG--FPG-----
... FAGYFSKDAIIESAYASVAHGGFASSYAFVLLVCMTSFYSWRLYFMTFEGKPRWGADA-HAAHAHAHAHDD--
... -----HHGHGHDHTP-----
... HESPWMLIPLAVLSLGAVAAGFVFKDAFIGH-DYEH---FW--
... KAALFTGKDNHILHAMHEVPGWVVASPFVAMLIGLALAYMYVRR-----
... -----
... PDVPGKLAANPALYKFLLNKWYFDELYDFLFVVKPAMWLKFLWKK-GDGFVIDGMGPDGIS-
... ARVVDVTNRVRLQGTGYVYHYAFAMLVGAGVFTWYLVARG-----
413 >WP_181052769_NuoL_Microvirga_mediterraneensis
414 MY-----HAIVFLPLVGFLIAGIFG----RVLGARPSELITTALLFVAAVLSWVSFIHVGF--
... GDEPMVRVQVA-QWMSVGDLDQVDWAFRIDTLTAMMLVVNTVSALVHLYSIGYMHEDPH-----
... RPRFFAYLSLFTFAMLMVLTADNLVQMFFGWEGVGLASYLLIGFWYQKDSANAAAMKAFIVNRVGDGFGFLLGIF
... TIFVLFNGVTF--DQIFPRVAEFAEAK---
... FHFLGIEWHALTIACLLLFMGAMGKSAQFLHTWLPDAMEGPTPVSALHAATMVTAGVFMVARLSPVFEYAPA
... ALTVVTVIGGITAFFAATVGLVQNDIKRVIAYSTCSQLGYMFVALGVGAYGAGVFHLFTHAFFKALLFLGAGSV
... IHAMHHEQDIRHMGALRRYIPFTTAMMAIGTLALTG--FPF-----
... TAGYYSKDAIIEAAYAASHSSAGSFAFLATVVAAFMTSFYSWRLFFLTFEGSARWGHGHHSPSAHEGVEHDESGH
... DVEPASHAQHEHGHDDHAHGHHGSHMP-----
... LESPLVMLLPLLVLAIAGAVVAGFMFHGAFIGE-GYQE---FW--
... KGALFTRPENKILETMHHLPGWVPLLPTIMMILGFLVAVYMYIID-----
... -----
... NKQPAKLAADHPILYRFLLNKWYFDELYDAIFVRPAMAIGRFFWRT-GDQRIIDGLGPDGIS-
... ARVLDVTRGVVRVQTGYVYHYAFAMLVGVAALVTFYLFVFRGAH-----
415 >WP_027316570_NuoL_Microvirga_flocculans
416 MY-----HAIVFLPLVGFLIAGLFG----RVLGARPSEIVTTALLFVAAVLSWVSFIQVGF--
... GDGATRVQIA--QWMSVGDLDQVDWAFRIDTLTAMMLVVNTVSALVHLYSIGYMHEDPH-----
... RPRFFAYLSLFTFAMLMVLTADNLVQMFFGWEGVGLASYLLIGFWYQKDSANAAAMKAFIVNRVGDGFGFLLGIF
... TVFVLFNGVTF--DAIFSRVGEFANAK---
... FHFLGIEWHALTIACLLLFMGAMGKSAQFLHTWLPDAMEGPTPVSALHAATMVTAGVFMVARLSPVFEYAPA
... ALTVVTVIGGITAFFAATVGLVQNDIKRVIAYSTCSQLGYMFVALGVGAYGAGVFHLFTHAFFKALLFLGAGSV
... IHAMHHEQDMRHMALRRYIPITTAMMAIGTLALTG--FPF-----
... TAGYYSKDAIIEAAYASHSSAGSFAFLATVVAAFMTSFYSWRLFFMTFEGSARWG---
... HGDHAHAHAPHDHEGVEHDAHGRDVEAASH-AQHEHGHGGHTP-----
... HESPLVMLLPLFVLAAGAVVAGAVFHGAFLGE-GYEE---FW--
... KGALFTRPENKILEAMHHLPVWVPLLPTLMMALGFALAYMYIVD-----
... -----
... AKQPAKLAADHPILYRFLLNKWYFDELYDAIFVRPAMAIGRFFWRT-GDQRIIDGLGPDGIS-
... ARVLDVTRGVVRVQTGYVYHYAFAMLVGVAALVTFYLFVFRGAH-----
417 >WP_112664104_NuoL_Microvirga_flavescens
```



```
418 MY-----YAIVFLPLVGFLIAGLFG----RVIGARPSELITTAFLFIAAALSWVAFFQVGF--
... GHGAVRIQIA--QWFSSGDLVDWALRIDTLTAIMLIVVNTVSALVHLYSIGYMHEDPH-----
... RPRFFAYLSLFTFAMLMLVTADNLVQMFFGWEGVGLASYLLIGFWYQKESANAAAMKAFIVNRVGDGFGFLLGIF
... LIFVLFKTVNF--DQIFPRVAEFEKAQ----
... FHFLGFDWNALTLACLLLFMGAMGKSAQFLLHTWLPDAMEGPTPVSALIIHAATMVTAGVFMVARLSPVFEYAPD
... ALTVVTVIGGITAFFAATVGLVQNDIKRVIAYSTCSQLGYMFVALGVGAYSAGVFHLFTHAFFKALLFLGAGSV
... IHAMHHEQDIRAMGGLRKYIPFTTGMMMAIGTLALTG--FPF-----
... SAGYYSKDAIIEAAYAASHSPAGSFAFLATVVAAFMTSFYSWRLFFLTFEGKARWN--
... GEAHTHEGAEHNASGHDVSHAHAD-----HSHDDHGHGAHKP-----
... HESPLVMLIPLLVLAI GAVVAGFAFSGAFIGH-GYEH---FW--
... KGAI FTRPDNKILED MHHLPGWVPLLPTVMMVLGFL LAVWMYLID-----
... -----
... TKKPAQIAADHPILYRFLLNKWFDELYDAIFVRPAMALGRFLWRT-GDGKIIDGLGPDGIS-
... ARVLDVTRGVVRVQTGYLYHYAFAMLIGVAALVTTYLFRGAH-----
419 >WP_202055072_NuoL_Microvirga_aerilata
420 MY-----HAIVFLPLVGFLIAGLFG----RLLGPRPSEIVTTALLFVAAVLSWVSFIQVGF--
... GDGATRQVA--QWMSVGD LVVDWAFRIDTLTAMMLVVNTVSALVHLYSIGYMHEDPH-----
... RPRFFAYLSLFTFAMLMLVTADNLVQMFFGWEGVGLASYLLIGFWYQKDSANAAAMKAFIVNRVGDGFGFLLGIF
... TLFVLFNGVTF--DQIFPRAAELANAN---
... FHFLGIEWHALTIACLLLFMGAMGKSAQFLLHTWLPDAMEGPTPVSALIIHAATMVTAGVFMVARLSPVFEYAPA
... ALTVVTVIGGITAFFAATIGLVQNDIKRVIAYSTCSQLGYMFVGLGVGAYSAGVFHLFTHAFFKALLFLGAGSV
... IHAMHHEQDMRNMGALRRYIPVTTAMMAIGTLALTG--FPF-----
... TAGYYSKDAIIEAAYASHSTAGTFAFLATVIAAFMTSFYSWRLFFLTFEGTARWS-
... NADHHAHGHEGVEHDGHS--DVEPAT---HAQHEHGHHGDHTP-----
... HESPLVMLLPLVVLAI GAVVAGIVFHGAFIGE-GYAD---FW--
... KGAL FTRPENHILEEMHHLPGWVPLLPTVMMILGFVLAVYMYMID-----
... -----
... AKKPAQLAAEHPVLYRFLLNKWFDELYDLLFVRSAMWIGRFFWRT-GDQRIIDGLGPDGIS-
... ARVMDVTRGVVRVQTGYVYHYAFAMLIGVAALVTFYLFYRGAH-----
421 >WP_009491127_NuoL_Microvirga_lotononidis
422 MY-----HAIVFLPLVGFLIAGIFG----RVLGARPSEIVTTALLFVAAVLSWVSFIHVGF--
... GDEPMIRVQIA-QWMSVGD LQVDWAFRIDTLTAMMLVVNTVSALVHLYSIGYMHEDPH-----
... RPRFFAYLSLFTFAMLMLVTADNLVQMFFGWEGVGLASYLLIGFWYQKDSANAAAMKAFIVNRVGDGFGFLLGIF
... TIFVLFNGVTF--DQIFPRVAEFADAK---
... FHFLGIEWHALTIACLLLFMGAMGKSAQFLLHTWLPDAMEGPTPVSALIIHAATMVTAGVFMVARLSPVFEYAPA
... ALTVVTVIGGITAFFAATVGLVQNDIKRVIAYSTCSQLGYMFVGLGVGAYGAGVFHLFTHAFFKALLFLGAGSV
... IHAMHHEQDIRHMGALRRYIPFTTAMMAIGTLALTG--FPF-----
... TAGYYSKDAIIEAAYAASHSAGSFAFLATVVAAFMTSFYSWRLFFLTFEGSARWG-
... HHDHHAHAPHDHEGVEHDDHNRDVEPAT---HAQHEHGHHGSHMP-----
... HESPLVMLLPLLVLAI GAVVAGFVFHGAFIGE-GYQE---FW--
... KGAL FTRPENEILETMHHLPGWVPLLPTIMMILGFLVAVYMYIID-----
... -----
... NKQPAKLAADHPILYRFLLNKWFDELYDAIFVRPAMAIGRFFWRT-GDQRIIDGLGPDGIS-
... ARVLDVTRGVVRVQTGYVYHYAFAMLIGVAALVTFYLFYRGAH-----
423 >WP_106335304_NuoL_Alsobacter_soli
424 MY-----QAIIVFLPLVGFLIAGLFG----RIIGARASEVTTAFLMAAALLSWIAFFQVGL--
... GHHEALRVQVA-QWMVAGDLKVDWAFRIDTLTVVMLVVNTVSSLVHLYSIGYMHEDPH-----
... RPRFFAYLSLFTFAMLMLVTS DNLVQMFFGWEGVGLASYLLIGFWYQKPSAVAAAMKAFIVNRVGDGFGFSLGIF
```

```
424... LVFVLSGSVAF--PEIFPKAEIYAKGT---  
... FHFIFYDWNAMTIACLLLFMGAMGKSAQFLHTWLPDAMEGPTPVSALHAATMVTAGVFMVARLSPLFEQSHV  
... ALSVVMIVGATTAFFAGTIGLVQNDIKRVIAYSTCSQLGYMFVALGAGAYGAGIFHLFTHAFFKALLFLGAGSV  
... IHAMHHEQDIRHMGGLARKIPFTTVMFAIGTLALTG--FPL-----  
... TAGYYSKDAIIESSYAHTFGNAYAFILLSITAGLTSFYSWRLFFVTFMGAPRWD----  
... TPHGHDLAVSHHVESEDDSHGS-----HAHAGDHGHGHHEP-----  
... HESPLTMLIPLGVLGLGALFAGLVFEGYFFGH--AYDE---FW--  
... KNALHTGPENHILHAVHEIPAWAKYSPTVEMIIGFVVAYIFYIQK-----  
-----  
... PYLPRQLAESQPLLYRFLLNKWFDELYDVIFVRPAKWLGRFLWKK--GDGAVIDGFGPDGVS--  
... ARVVDVTQAVVRLQTGYVYHYAFAMLIGVAALVTWYMFGGAH-----  
425 >WP_020175212_NuoL_Methyloferula_stellata  
426 MY-----FAIVFLPLAGFLIAGLFG----RQIGARASEIITTSFLFGAAFLSWIAFSQVAL--  
... GSTPASVPVIG--TWFNVGALQVDWALRIDSLTVMLIVVNTVSALVHLYSIGYMHEDEPA-----  
... RPRFFAYLSLFTFAMLMLVTADNLVQMFFGWEGVGLASYLLIGFWYQKPSANAAAIKAFVNVRVGDFGFAIGIF  
... LVFYITNSVAF--DPIFAAAPGLAHTK---  
... IHVFSHDVDAMTITCLFLFMGAMGKSAQFLHTWLPDAMEGPTPVSALHAATMVTAGVFMVARLSPLFEQAPV  
... ALSFVTIIGGTTAFAATVGLVQNDIKRVIAYSTCSQLGYMFVGLGVGGYDLGIFHLFTHAFFKALLFLSAGSV  
... INAMHHEQDMRKMGLAKKIPFTFMMVIGTLALTG--FPL-----  
... TAGFFSKDAIIEAAFASGRFGSFYAFLLIDFAAGLTSFYSWRLIFMTFYGPAHWD--HHGVDHDEHAAHDE----  
-----AHGHAHTFVP-----  
... HESPAVMLIPLAVLAFGSIFAGLAFGGFFIGE--GQAD---FW--  
... KGALFYASDNHILHEMHTIPAFVSYSPFMMCGGFLVALYVYILR-----  
-----  
... PGTAANWAAANPALYKFLLNKWFDELYDLIFVRPAFWLGRFLWKG--GDGAIIDGLGPDGVS--  
... ARVIDITHRVVKLQTGYIYHYAFAMLIGVAALMTYYLFGGIR-----  
427 >WP_133769151_NuoL_Enterovirga_rhinocerotis  
428 MY-----HAIVFLPLVGLIAGLFG----RFIGARPSELITTGLMMVAALLSWVAFISVGF--  
... GSGATRQVA--NWFTSGELVIDWAFRIDTLTAVMLVVNSVSALVHLYSMGYMHEDPH-----  
... RPRFFAYLSLFTFAMLMLVTSNLAQMFFGWEGVGLASYLLIGFWYKPSANAAAMKAFIVNVRVGDFGFALGIF  
... LVFVLFGTTTTY--SEIFAKIGEVDKDAH---  
... FHFIFGEWHALTLACLLLFMGAMGKSAQFLHTWLPDAMEGPTPVSALHAATMVTAGVFMVARLSPLFDAAPA  
... ALTVVVTIIGAITAFAATVGLVQNDIKRVIAYSTCSQLGYMFVALGVGAYGAAVHFLFTHAFFKALLFLGAGSV  
... IHAMHHEQDMRNMGLRKYIPFTWAMMLVGTALTG--FPF-----  
... TAGYFSKDAIIEAFMSDRPGHAI AFVSTLVA AFMTSFYSWRLAFMTFEQTARWGAGHGHDAHGDAAHGDAGHG  
... HAAHADHAHDEHAAHGDDHHGHGHDKP-----  
... HESPLVMLVPLGVLAFGAIFAGMIFAGSFVGH--HAAD---FW--KGALAESQYAVFEAMHH--  
... APKWVVWSPFVAMVLGWALAWVMYIRK-----  
-----PYLPGELAASQPIAYRFLLNKWFDELYDFLFVRPAKRLGYFLWKR--GDGTVIDGMGPDGIS  
--ARVVDVTRGVVRLQTGYVYHYAFVMLIGVAALVSWYLIVGAGAH-----  
429 >WP_088519014_NuoL_Rhodoblastus_acidophilus  
430 MY-----SAIVFLPLLGLIAGLLG----KKIGDRASEIVTTALLFVSCALSWITFFDVGL--  
... HDGHFSAPVIA--NWLTSGLDKIDWALRVDTLTSVMLIVVTTVSALVHLYSIGYMHEDEKS-----  
... RPRFFAYLSLFTFAMLMLVTSNLAQMFFGWEGVGLASYLLIGFWFEKPSANAAAIKAFVNVRVGDFGFSLGMF  
... LVFMLTGSISF--DVIFAAAPDLASKS---  
... VHAFLDWNAMTLACLLLFMGAMGKSAQFLHTWLPDAMEGPTPVSALHAATMVTAGVFMVARLSPLFEQSAT  
... ALTVVTLVGGITAFFAATVGLVQNDIKRVIAYSTCSQLGYMFVGLGCGGYALGIFHLFTHAFFKALLFLGAGSV  
... IHAMHHEQDMRQMGGLWSKIPVTFACMTIGTLALTG--FPL-----
```

```
430... TAGYFSKDAIIEGAFAGAHSFAASFALLVVAAGMTSFYSWRLVFMTFFGERRWS-
... EQYKLLHPAPQAAHGHGHGDDGHG-----AHDDPHGHHIGEP-----
... HESPATMMVPLFVLSAGALAAGYAFKDQFIGH-EAGE---FW--
... RTSLFTGANNHILHEMHEIPAWVGYPFAMMVGGFVVALAMYVIA-----
...
... PKVPAALAEKFPRLYLFLLNKWFDELYDKIFVKPAFALGRLFWKG-GDGAIIDRFPGDGVA-
... ARVLDGAGVASRLQTGFIYNYAFAMLLGVAALITYGLFALGGGQ-----
431 >WP_188518029_NuoL_Alsobacter_metallidurans
432 MY-----QAIVFLPLVGFGLIAGLFG----RIIGARASEIVTTAFLMAAALLSWVAFFQVGL--
... GHGETRVQVA--QWMVSGDLKVDWAFRVDLTLTVMLVVVNSVSSLVHLYSIGYMHEDPH-----
... RPRFFAYLSLFTFAMLMLVTADNLVQMFFGWEGVGLASYLLIGFWYNKPSAVAAAMKAFIVNRVGDGFGFALGIF
... LVFVLTGSVAF--SEIFPKVEEIAKGT---
... FHFFIGYDWNAMTIACLLLFMGAMGKSAQFLHTWLPDAMEGPTPVSALIIHAATMVTAGVFMVARLSPLFETSPV
... AMSAVLVFGATTAFFAGTIGLVQNDIKRVIAYSTCSQLGYMFVALGAGAYGAGIFHLFTHAFFKALLFLGAGSV
... IHAMHHEQDIRHMGGLARKIPFTTAMFAVGTALALTG--FPL-----
... TAGYFSKDAIIESSYATHTYGNAYAFILLSITAGLTSFYSWRLFFLTFMQPRWDTAHGHDAHASGHVESEDDS
... HGSH-----AHAGDHGHGHHEP-----
... HESPLSMLIPLGVLVGALFAGLAFESFFFGH-AYEE---FW--
... KGAVHTGPDNHILHAIHEVPGWVKYSPTVEMIIGFVVAYIFYVQK-----
...
... PYLPRQLAESQPTLYRFLLNKWFDELYDVIVFRPAKWLGRFLWKK-GDGLVIDGMGPDGVS-
... ARVVDVTNAVRLQTGYVYHYAFAMLIGVAALITWYMFGGAH-----
433 >WP_104509173_NuoL_Rhodoblastus_sphagnicola
434 MY-----SAIVFLPLLGLIAGLAG----RKIGDRASEIVTTLLFVSCALSWKVFLDVGL--
... NDGHFSAPVLA-NWLTSGDLKIDWALRVDTLTSVMLVVVTTVSALVHLYSVGYMSEDPS-----
... RPRFFAYLSLFTFAMLALVTADNLAQMFFGWEGVGLASYLLIGFWYEKPSANAAAIAKAFVNRVGDGFGFSLGMF
... LIFLLTGSISF--DTIFAAAPGLADKS---
... IHAFGLDWNAMTLTCLLLFMGAMGKSAQFLHTWLPDAMEGPTPVSALIIHAATMVTAGVFMVARLSPLFEQSPT
... ALTVVTLVGATTAFFAATVGLVQNDIKRVIAYSTCSQLGYMFVGLGCGGYALGIFHLFTHAFFKALLFLGAGSV
... IHAMHHEQDMRQMGLWTKIPITFACMTIGTLALTG--FPF-----
... TAGYFSKDAIIEGAFAGAASGHSAAAFYAALVVAAGMTSFYSWRLVFMTFFGPRRWS-DEYKALHGHAAAQDDH--
... -----GHDDAHAAHHIGEP-----
... HESPLTMMIPLFVLSAGALGAGYVFKDHFINE-GAQE---FW--
... RTSLFTGANNHILHEMHQTPYWVEPLPLLMMGGGFLVALVLYVIA-----
...
... PKIPAALAARYPKLYLFLLNKWFDELYDRIFVKPAFWLGRFLWKG-GDGAIIDRLGPDGIA-
... ARVIDGAGLASRLQTGFIYNYAFAMLLGLAALITYGLFAVGGGQ-----
435 >WP_108659702_NuoL_Acuticoccus_kandeliae
436 MV-----QLIVFLPLFGFLFAFLFG----RQVGALAAQVVTGLLFVCAVLSWIVFFNWGF--
... HGAPTERILIA-QWIVSGDLEIAWRLRVDTLTAVMLIVVNTVSALVHLYSFGYMSHDPH-----
... KAKFFSYLSLFTFAMLMLVTSNLAQMFFGWEGVGLASYLLIGFWSRPSANAAAIAKAFVNRVGDGFGFLLGIF
... TLFAMTGVVQL--DAVFASAPALSTHT---
... FTFLGFEVPAIELICLLLFIGAMGKSAQIFLHTWLPDAMEGPTPVSALIIHAATMVTAGVFMVARMSPVFEFAPS
... ALAFVTFIGATTAMFAATIGCAQNDIKRVIAYSTCSQLGYMFAALGVGAFGIAIFHLFTHAFFKALLFLSAGSV
... IHAMHDEQDMRRMGGLWKKIPYTYIGMMAGTLALTG--FPL-----
... TAGYFSKDAIIEATFVGENPFAIYAFIMTVGAALLTSFYSWRLVFMTFHGTTRAPADTFKHA-----
... -----
... HESPWTMLVPLGVLTALGALAAGYVFATVFLSE-PTGD---FW--
```

```
436... NGAIFASAANHVLHAMHEVPTWVILSPAIAMVIGFCIAVLTYILV-----  
-----  
... PTLPKRFIEAFPRVHQFFLNKWFDELYDYIFVRPARWLGRMFWR--GDGRVIDGVGPDGIA--  
... ARVKDLSVIAHRFQSGYLYHYAFVMLTGIASFVTVMIALNRGYL-----  
437 >WP_012170207_NuoL_Azorhizobium_caulinodans  
438 MY-----QAIVFLPLIGFLIAGLFG----RVLGPRPSELITTALLFIACLFAWITFIKVGf--  
... AGFDTRVQVM--HWIYVGDLDKIDWALRIDTMTAIMLIVVTSVSSLVHLYSIGYMHEDEPS-----  
... RPRFFAYLSLFTFAMLMVLTADNLVQLFFGWEGVGLASYLLIGFWFEKPSANAAAMKAFVNVNRVGDGFGMLGIF  
... AVFVMTGSVSF--DTIFAQAPSLAGKT---  
... ITFLGHHWDAPTVIALLLFIGAMGKSAQFLLHTWLPDAMEGPTPVSALHAATMVTAGVFMVARMSPIFELSPS  
... ALDVTIVGATTAMFAATVALVQNDIKKVIAYSTCSQLGYMFVAMGAGAYSVGVFHLFTHAFFKALLFLGAGSV  
... IHAMHHEQDMRHMGGLYKKIPFTYGAMMIGTLAITG--FPF-----  
... LAGYYSKDAIIEAAYASHSHFRVYAYWMTVLAALTSFYSWRLVFLTFHGHPHDH--HHYDHA-----  
-----  
... HESPLVMTIPLAVLSVGAVIAGFVCYNLFVGH--DVEH---FF--  
... RSSIFMGPDNHILHAMHEVPGWAAYMPTVMMVLGFVVAYWFYMVD-----  
-----  
... RRVPAALAKSQDALYQFLLNKWYIDELYNFLFVRPALCLGRILWKK--GDGAIIDGLGPNGIS--  
... ARVLDVTGQLVRLQTGYLYHYAFVMLVGVAIITWFMFAGV-----  
439 >WP_05503695_NuoL_Blastochloris_viridis  
440 MY-----QLIVFLPLLGCVIAGLFG----RVIGSRPSEIVTTALVGVSALLSWIAFFNVGY--  
... DGESGRILVS--TWIEAGSFKADWAFRIDTLTVVMLVVVNTVSALVHFYSIGYMADDPH-----  
... RPRFFSYLSLFTFAMLMVLTSDNLVQMFFGWEGVGLASYLLIGFWYKPSANAAAIKAFVNVNRVGDGFGFALGIF  
... AIFWMVGSTDF--TTIFAQVPTLQDKV---  
... IAVAGVPFDALTLICLLLFMGAMGKSAQFLLHTWLPDAMEGPTPVSALHAATMVTAGVFMVARLSPLFELAPT  
... AQEVVILVGATTAFFAATVGLVQNDIKRIVAYSTCSQLGYMFVAMGVGAYSVMGFHLFTHAFFKALLFLGSGAV  
... IAMHHEQDVRKMGGLRKAIPFTYAMMIGTLALTG--FPF-----  
... TAGYYSKDAIVESAFVSHAALSGYGFVMLVIAAALTSFYSWRLVFLTFHGAPRFVAADGHHGHGDHGHGHGSRI  
... EDV-----  
... HEAPKTMLLPLLVLAVGALGAGFAFYVPFVDQ--HGVAE--FF--RDSISLSKL--  
... GLLEEMHHAPALVVFAPTIAMAAGLAVAVLFYLV-----  
-----PGLPVALARSMRPLYLFLLNKWFDELYDVIFVRAAKRLGRFLWKQ--  
... GDGAVIDGLGPDGIA--ARVLDTTDRVVRLQTGYLYHYAFAMLIGLAALVTWFMFAGGVR-----  
441 >WP_183750461_NuoL_Pseudocheilatochloecoccus_contaminans  
442 MY-----QAIVFLPLVGLVAGLFG----RFIGARASEIITTSLLFVTAALSWVAFVTVGF--  
... GTETFYVPIA--RWITSGTLIVDWALRIDTLTVVMLVVVNSVSALVHLYSIGYMHEDEPD-----  
... RPRFFAYLSLFTFAMLTAVTADNLVQMFFGWEGVGLASYLLIGFWYKPSACAAAMKAFIVNVNRVGDGFGMLGLL  
... LTFIVFGSVSF--GDIFSRTAEFQDAT---  
... FNFIFGEWHTLTLISLLLFIGAMGKSAQFILHTWLPDAMEGPTPVSALHAATMVTAGVFMVTRMSPVFEYAPS  
... ASTVIVIGAVTAFFAATIGLVQNDIKRIVAYSTCSQLGYMFVALGVGAYSAGVFHLFTHAFFKALLFLGAGSV  
... IHAMHHEQDMRKMGGRLRKYIPFTALAMTIGTLALTG--FPF-----  
... TSGFYKDAIIESAFASHSSVAGFAFTSTIVAALMTSFYSWRLYFMTFEGKPRWE--  
... HHDDHAHGHDDHADDGHDHHP-----  
... HESPLVMLLPLVVLSIGALFAGAVFYNAFIGS--GYDA---FW--  
... KGAIFTNPDNHILHDMHEVPLWVKLAPVVTMVGFLALWFYVLD-----  
-----  
... TSKPRQLAAAFPGVYRFLLNKWYIDELYNFLFVRPAKELGRFFWKQ--GDGWLIDGHGPDGIS--  
... ARVLDVTGRVVKLQTYVYHYAFAMLIGVAAFVTWYIFGGAV-----
```

```
443 >WP_015821652_NuoL_Methylobacterium_extorquens
444 MY-----HAIVFFPLIGALIAGLFG----RFIGARMSELVTTGCLAFALLSWGAFLLVTG--
... DGRAETVPVA--QWFTAGDLVVDWAFKVDLTLAVMLVVVTSVSTLVHLYSIGYMHEDPH-----
... RPRFFAYLSLFTFAMLMMLVTADNLVQMFFGWEGVGLASYLLIGFWYKPSANAAAMKAFIVNRVGDGFGSLGIF
... LVFVLTGSGVF--DAIFAKAPELKDAT----
... FHFLGHDWHALTLACLALLFMGAMGKSAQFLLHTWLPDAMEGPTPVSALHAATMVTAGVFMVARLSPLFELAPT
... ALTVVTVIGGITAFFAATVGLVQNDIKRVIAYSTCSQLGYMFVGLGVGAYATGVFHLFTHAFFKALLFLGAGSV
... IHAMHHEQDMRNMGGLRRYIPFTTAMMTIGTIALIG--FPF-----
... TSGYYSKDAIIEAAYMSDRPGHVLAFATVIAALMTSFYSWRLFFLTFEGPQRWVAH-
... GAHGHDDHAHAHEHDHVHAASAHEADGAPGHHEGVAHDDHGHGHDVEPASHSAV--EHHDHAPLTP-----
... HESPLVMTIPLAILAFGALFAGLIFKERFIGH--DMDK---FW--
... GNALPHGSGNDIMHKIHDAPGWVAASPFVMLVLGFLAFWMYLRR-----
... -----
... PDLPHRLAESQPILYRFLLNKWFDEIYDRIFVRPAKNFGLFLWKE--GDGRVIDGLGPDGIS-
... ARVVDITRGVVRLQTGYVYHYAFVMLVGVAGLITWYLVSGVP--GGTH-
445 >KIU34726_NuoL_Methylobacterium_radiotolerans
446 MY-----HAIVFFPLIGFLIAGLFG----RYIGARACEYITTAFLAFTALIAWGVFLDG----GHAE-
... RVQVA--SWFSAGDLQVDWAFKVDLTLTRVMLVVVTTVSTLVHLYSVGYMEEDPH-----
... RPRFFAYLSLFTFAMLMMLVTADNLVQMFFGWEGVGLASYLLIGFWYKPSANAAAMKAFIVNRVGDGFGSLGIF
... LTFVLTGSAF--DAIFGKVDAIKTLT----
... FHFLGYDWNALTLACLALLFMGAMGKSAQFLLHTWLPDAMEGPTPVSALHAATMVTAGVFMVARLSPLFEEAPN
... ALIVVTVIGGVTAFFAATIGLVQNDIKRVIAYSTCSQLGYMFVALGVGAYSAGVFHLFTHAFFKALLFLGAGSV
... IHAMHHEQDMRNMGGLRRYIPYTSAMMAIGSLALIG--FPY-----
... TAGYYSKDAIIEAAYASTRPGHTLAFLCVVVAFFTSFYSWRLFFMTFEGPARWGAHA-
... AHSHHDAPAVAHSTMAHEADGAPGHTEGVAHDDKGHGHDVEPAHRSDLVADDHHGHGHHGDHTP-----
... HESPLVMTIPLAILAFGALFAGIIFHNRFIGE--GMDA---FW--
... GHALAHGPNNHIMHEIHEVPALVSYSPLVMLILGFVLAYWMYIRR-----
... -----
... PELPGQLAAQPSLYRFLLNKWFDEIYDRIFVRPAKDFGLFLWKE--GDGRIIDGLGPNGLIA-
... ARVVDVTRGVVRLQTGYLYHYAFVMLIGVAGLISWYLMGLP--KGAH-
447 >WP_18891554_NuoL_Salinarimonas_ramus
448 MY-----QAIVFLPLLGLFVAGIFG----RFIGARPSEIVTTALLVVSAAALSWVAFFDVAL--
... GEGPEVFRVQVATWMVSGGLSVDWAFRIDTLTVVMLVVVNTVSALVHLYSIGYMHEDPH-----
... RPRFFAYLSLFTFAMLMMLVTSNDNLVQMFFGWEGVGLASYLLIGFWYKPSANAAAMKAFVNRVGDGFGFALGIF
... AVFFLFGSVQF--EEIFAAIPAYAETGGP-
... VLLGLSSEGAITLAALLLFMGAMGKSAQFLLHTWLPDAMEGPTPVSALHAATMVTAGVFLVARMSPLEFAPN
... ALTVVTVYGALTAFFAATVGLVQNDIKRVIAYSTCSQLGYMFVALGIGAYGAGIFHLFTHAFFKALLFLGAGSV
... IHALHHEQDLRNMGGLRRHIPFTAAMMAIGTLALTG--FPF-----
... TAGYYSKDAIIEAAYASPTTAGDVAFVATVIAALFTSFYSWRLFFLAFEGAPRWA-
... GHGDATHAAHGHDDHEGVAHGAHDQDLEPAHAAAHEHA--DHGHG-----HGHGHGHGHGAP-----
... HESPLVMTIPLGVLAVGALLAGMLFKESFVGH--DWHH---FW--
... EGAIYTREGNTIMEDFHHVPAVWVWSPFVMMVLGFLGAFWMYIRD-----
... -----
... KAAPARLAGRHPVIYRFLLNKWFIDELYDMLFVQPSKRLGRFLWRT--GDGRVIDGLGPDGVS-
... ARVLDATSWVVRLQTGYVYHYAFVMMIGVAALVTWYLVGTGAR-----
449 >SEC00671_NuoL_Rhizobiales_GAS188
450 MY-----SAIVFLPLFGFIIAGGFG----RIIGARGAEVTTGFLLLGMVLSWIAFFQVGL--
... GHQSFHVDIA--PWIIISGGLRTDWALRIDTLTAVMLVVVNTVSGLVHLYSIGYMAEDTS-----
```

```
450... RPRFFAFLSLFTFAMLMVLTADNLVQMFFGWEGVGLASYLLIGFWYDRPSANAAAIAKAFIVNRVGDGFGFALGIF
... LVFTLFGTVSL--SDIFARAPEMAKGS----
... YHFIGFDWPALTLACLLLFMGAMGKSAQFLHTWLPDAMEGPTPVSALIIHAATMVTAGVFMVARLSPLFEQAPA
... AQTVVLAIGGMTAFFAATVGLVQNDIKRVVAYSTCSQLGYMFVGLGAGAYSVGIFHLFTHAFFKALLFLGAGSV
... ITAMHHEQDMRKMGGWLKSIPTGMMVIGTLALTG--FPL-----
... TAGFYSKDAIIIEAAYATDRPGHVFAFLCTTIAALMTSFYSWRLIFMTFFGTPHWAADGHGAADAHADAHADAGD
... DDAHEHHGPIVP-----
... HESPLVMLVPLAVLALGSLFAGLAFKGVFFGG-AAEH---FW--NNSLIFDED--
... IVKKIEEVPFVVEHSALVMMLIGGGVAYWYFVAN-----
... -----PSLPVRLAARNPILYQFLLNKWFDEIYEIVFVRPAKAIGRFLWKQ-
... GDGRMIDGLGPDGVS-ARVIDVARGAVRLQSGYLYHYAFAMLIGVAAFITYFMIAGAR-----
451 >WP_106748567_NuoL_Phreatobacter_cathodiphilus
452 MY-----QAIIVFLPLVGLIAGLFG----RAIGARASEIVTTSLLGIAALLSWVAFYQVGY-
... AGQGTVELMR---WISAGSLNVSWSLRIDTLTAVMLVVNSVSFLVHLYSIGYMHEPD-----
... RPRFFAYLSFTFAMLMVLTANDLLQMFFGWEGVGVASYLLIGFWYKKPSANAAAMKAFIVNRVGDGFGFLLGIF
... GLYTLTGSIGF--EAVFSAAQGLSGQK---
... MAFLGYQLDALTVVCLLLLFMGAMGKSAQFLHTWLPDAMEGPTPVSALIIHAATMVTAGVFMVARLSPVFEYAPG
... ALQVVMFFGATTAFFAATVGLVQNDIKRVIAYSTCSQLGYMFVALGAGAYSVGIFHLFTHAFFKALLFLGAGSV
... IHAMHHEQDIRRMGGLAPHIKFTYAMMVIGTLALTGFGIPFLH-----
... IGFAGYHSDAIIIEVAYAAHGAMGPYAFFMTVIAALMTSFYSWRLIFMTFHGQPRW-AGAH-
... GHHDDHAHADAAAHHGADPHAHAHGAK-DDHHHDDHGHGHGHAHQ-----
... HESPLVMLIPLGALAVGAVFSGVVMKKFTDE-AGIKG--FF--
... RDSIFMRPENHIIHEFHSVPGWVPWTPFVMAIGFALAWYMYIKR-----
... -----
... PDVPVQLAREHQGLYQFLLNKWFDELYDRIFVRPARWLGRFFWKKGGDGWLIDGFGPDGIA-R-
... VVDITRGGVRLQTGYVYHYAFAMLIGVAALATWFMFSGGVG-----
453 >WP_136964045_NuoL_Phreatobacter_stygius
454 MY-----QAIIVFLPLVGLIAGLFG----RAIGARGSEIVTTSLLGISALLSWVAFVQVGF-
... GGQTASIELFP---WISAGALEVSWTLRIDTLTAVMLVVNSVSFLVHLYSIGYMNEDPH-----
... RPRFFAYLSLFTFAMLMVLTADDLLQMFFGWEGVGLASYLLIGFWYQKPSANAAAMKAFIVNRVGDGFGFALGIF
... GLYKLTGSIEL--DTIFGAAQGLVGKK---
... MEFLGYQLDALTVVCLLLLFMGAMGKSAQFLHTWLPDAMEGPTPVSALIIHAATMVTAGVFMVARLSPVFEYSPT
... ALSVVMFFGATTAFFAATVGLVQNDIKRVIAYSTCSQLGYMFVALGAGAYSVGIFHLFTHAFFKALLFLGAGSV
... IHAMHHEQDMRNMGGLAPHIKVTYAMMLIGTLALTGFGIPFLH-----
... VGFAGFHSDAIIIEVAYASHNVMGYPYAFALTVVAAAMTSFYSWRLIFMTFHGKPRW-ANGH-
... GAHGDAHDEEEHGIGH-----EPNGHDHQP-----
... HESPAVMLIPLVLLAIGAVFAGVVFAYQFADH-HGVEK--FF--
... RESLFFRPDNHIMDEFHHVPGWVPWTPFVMAFGFVLAWYMYIRH-----
... -----
... PEMPGQLARRHPALYQFLLNKWFDELYDRIFVRPARALGRFFWKQGGDGWLIDGFGPDGVA-R-
... VVDVTRGVVRIQTGYVYHYAFAMLIGVAALATWFMFSGGLH-----
455 >KKB10330_NuoL_Devosia_chinhatensis
456 MI-----QAIIVFLPLIGALIAGLLG----
... RQIGHRPAEFITGLLSVAAVLSWVFLPVAFVGDGHA AVLKVEIMRWIQVGDMDLRWTLRVDTLTAIMLVVVN
... TVSALVHVYSIGYMNEDPH-----
... RSRFFAYLSLFTFAMLMVLTADNFLQMFFGWEGVGLASYLLIGFWYTRPSATAAAMKAFVNRVGDGFGFALGIF
... GAFMVLGHIDF--
... DGAFQADEFATTGLPVIQFLGWQLDAMTVICLLLFMGAMGKSAQFLHTWLPDAMEGPTPVSALIIHAATMVTA
```

```
456... GVFMVARLSPLFETSPVALTVVIVGAIATAFFAATVGLVQNDIKRVIAYSTCSQLGYMFVALGVGAYSAGV FHL
... FTHAFFKALLFLGAGSVIHAMHHEQDMRNMGGGLRKKIPITYAMMMIGTLALTGVGIPGTN-----
... FGFAGFFSKDAIIESAYAFGGNAGTMAFWLLVIAALFTSFYSWRLVHLTFHGSPRDAQHHGEGPHDP AHSAL E
... SHDEPIDDSNADDHGHGHHHGSAYDNA-----
... HESPNVMLVPLYVLSVGAVLAGVVFYGMFFHD-VEHIHE-FF--AGSIFVDHQ--
... IIEDAHHVPTWVKWSATIAMIAGFVAAWFMYIRR-----
... -----PETPAKLAASNPGLYKFLLNKWFDELYNTIFVRPALWIGNAIWKG-
... FDDWLVDGKITEGLG-RRVQNVTSWVVKLQSGYLYHYAFAM LIGIAALLTWAITAGLL-----
457 >WP_108397312_NuoL_Devosia_submarina
458 MI-----QAIVFLPLIGALVAGLLG----
... RTIGHRPSEYITTGLLIISAVLSWVFLPVAFAGVGQAAAVKVEVMRWIQVGDMDVRWILRVDTLTAIMLVVN
... TVSSLVHVYSIGYMAEDPH-----
... RSRFFAYLSLFTFAMLMLVTADNFVQMFFGWEGVGLASYLLIGFWYTRPSANAAAMKAFV VNRVGD FGFALGIF
... GSFMLLGTVDVDF--DTAFSNLPAVSNFT---
... MRFLGWDVHALTVICLLLFMGAMGKSAQFLLHTWLPDAMEGPTPVSAL IHAATMVTAGVFMVARLS PMFETSPT
... ALTVVIVIGAIATAFFAATIGLVQNDIKRVIAYSTCSQLGYMFVALGTGAYSAGV FHLFTHAFFKALLFLGAGSV
... IHAMHHEQDMRNMGGGLGKKIPITYAMMLIGTLALTGVGIPGTF-----
... LGFAGFFSKDSII EAAYAYGGNVGSLAFWLLVIAAVFTSFYSWRLIHLTFHGSPRDAQHA-
... HTAHPDVAHAAAETHHEPIDDSNAHDHGHHDHAAHGS AHDNA-----
... HESPNVMLVPLYVLAVGAVLSGAVFYSMFFES-LEHVHE-FF--AGAIYVDHE--
... IIEGAHHVPLWVKWSATIAMIIGFVTAWFMYIKE-----
... -----PAVPGRIAAQNPGLYRFLLNKWFDELYDRIFVRPAVWVGR AFWRG-
... FDDWLINDKLTEGLG-RRVQNVTSWVVR LQSGYLYHYAFAM LIGIAALLTWAIAAGGLI-----
459 >MB00732892_NuoL_Methylocapsa_sp._Bacteria.bin_47
460 MY-----AAIVFLPLLGLIAGPLA----WRKGDRAAELVTTGLLFISLGLSWAVFFQVAL--
... GTAPASVSVLG-NWFTSGTLQIGWSLKIDSLTAVMLVVVTTVSAFVHLYSIGY MAGDPC-----
... RPRFFSYLSLFTFAMLMLVTADNLVQLFFGWEGVGLASYLLIGFWY EKPSANAAA IKA FVVNRVGD FGFELGIF
... LVFALTQSVGL--DQIFAAAPALAHKS---
... IHVFGSDLDALTVACLLLFMGAMGKSAQFLLHTWLPDAMEGPTPVSAL IHAATMVTAGVFMVARLS PLFEQAPA
... ALSFVIFIGATTAAFFAATVGLVQNDIKKVIAYSTCSQLGYMFVGLGVGGYSLGIFHLFTHAFFKALLFLGAGSV
... IIALHHEQDMRMMGGGLWRKIPFTFAMMIGTLALTG--FPF-----
... TAGYYSKDAIIEAAFESGRVGFYGFILTTLAAGLTSFYSWRLVFLTFFGAPRWAALA-
... ELPKSGLAHEQSANAGTGOAHEDHAFD-HP-----
... HESALTMLIPLAVLAAGALFAGIIFSSDFIG-HGATG--FW--KALILASTN--
... EVTEGHTLPSYVSIGPTALMVIGFVVALAFYILW-----
... -----PTIPSL LAKSLRPLYEFLLNKWFDELYDKIFVRPAFALGRLFWK-
... GGDGAIIDRFGPDGVAARVIEITGRVVKLQSGYIYHYAFAMLVGLAAVITWYTAWGIR-----
461 >WP_127143657_NuoL_Pelagibacterium_montanilacus
462 MI-----QAIVFLPLIGALVAGLFG----RTIGHKAAEVLTTSLLVIAAILSWIVFIPFFL--
... GNAEAYKVEIM-RWIVTGDLDLRWILRVDTLTAIMLVVNTVSCLVHVYSIGYMHDDPH-----
... RARFFAYLSLFTFAMLMLVTADNFLQMFFGWEGVGLASYLLIGFWYKKPSANAAAMKAFV VNRVGD FGFALGIF
... GTFYLVGSLGF--EDTFAALPGLADAT---
... IPILGGEYHALTVVCLLLLFMGAMGKSAQFLLHTWLPDAMEGPTPVSAL IHAATMVTAGVFLVARLS PMFEMSET
... ATLVIIYVGAIATAFFAATVGLVQNDIKRVIAYSTCSQLGYMFVALGVGAYSAGVYHLFTHAFFKALLFLGAGSV
... IHAMHHEQDMRNMGGIARKIPITYAMMIIGTLALTGVGIPGTM-----
... FGFAGFFSKDAIIEAAYAFGGPAGQLAFWMLVIAALFTSFYSWRLIHLTFHGKTRADQHT--FDHA-----
... -----
... HESPRIMLVPLYILAAGAVLAGVVFYDVFFGH-AEHVEH-FF--HGAVVVDAE--
```

```
462... IIDA AHYVPFWKASAMAMLAGFVLAWYFYIRR-----  
-----PEAPRELAAEHPGLYKFLLNKWFDEIYDFLVRPTRWVGQALWKG--  
... FDDWFVDQMLVEGLG--RRVKQVTTQVVRQLQSGYLYHYAFAMLIGVAALITWAI AAGLLG-----  
463 >WP_127071105_NuoL_Pelagibacterium_lentulum  
464 MI-----QAI VFLPLIGALVAGFFG----RVIGHKPAEILTTALLMISALLSWAVFIPFFL--  
... GNAEAYQVEVM--RWINSGDLDRWVLRVDTLTAIMLVVNTVSSLVHLYSIGYM HEDPH-----  
... RARFFAYLSLFTFAMLMLVTADNFLQMF FGWEGVGLASYLLIGFWYKKPSANAAAMKAFV VNRVGD FGFALGIF  
... GTFFLFGTLGF--DETF AVL SGAEGMT----  
... IPFLGAEFDAMTVICLLL FMGAMGKSAQFL LHTWLPDAMEGPTPVSAL IHAATMVTAGVFMVARLSPMFEMSET  
... ATLVVIYIGAITAFFAATVGLVQNDIKRVIAYSTCSQLGYMFVALGVGAYSAGIFHLFTHAFFKALLFLGAGSV  
... IHAMHHEQDMRNMGGIAKKVPLTYWMMIIGTLALTGVGIPGTM-----  
... FGFAGFFSKDAIEAAYAFGGPAGTLSFWLLVVAALFTSFYSWRLIHLTFHGKTRADHHT--FDHA-----  
-----  
... HESPNVMLIPLYVLA VGAVLSGVIFYDVFFGH--AEHVEH--FF--HGSIVVDAA--  
... IIDA AHYVPTWVKWSATVAMLAGFVGAWYFYIRS-----  
-----PETPKQLAAEHPHLYKFLLNKWFDELYHHIFVRPARWLGNALWKG--  
... FDDWFIDQTVVEGLG--RRVKQVTAQVVKLQSGYLYHYAFAMLIGVAALITWAI AAGLLG-----  
465 >WP_090596279_NuoL_Pelagibacterium_luteolum  
466 MI-----QAI VFLPLIGALVAGLFG----RVIGHKPAEILTT SMLIAAAVLSWIVFIPFFL--  
... GDGEAYKVTVM--EWIHSGDLQLDWVLRVDTLTAIMLVVNTVSSLVHLYSIGYM HEDPH-----  
... RARFFAYLSLFTFAMLMLVTADNFVQMFFGWEGVGLASYLLIGFWYKKESARAAAMKAFV VNRVGD FGFALGIF  
... GAFFLLGTLDF--DATFAALPGFADAT----  
... ISFLWWEAHAMTVICLLL FMGAMGKSAQFL LHTWLPDAMEGPTPVSAL IHAATMVTAGVFMVARLSPMFELSEA  
... ATLFIIYIGAITAFCAATIGLVQNDIKRVIAYSTMSQLGYMFVALGVGAYSAGVFHLFTHAFFKALLFLGAGSV  
... IHAMHHEQDMRNMGGIRKKVPLTYAMMLIGTLALTGVGIPGTS-----  
... FGFAGFFSKDAIVEAAYAFGGTAGSFSFWMLVTAALFTSFYSWRLIHLTFHGPTRADHHT--FDHA-----  
-----  
... HESPNVMMIPLYVLAAGAVLAGVVFYDVFFGH--AEHVEH--FF--HGSIVVDAA--  
... IDEAHHVPTLVKWSATIAMILGFIAAWMYIRN-----  
-----PSAPKQLAEHRGLYQFLLNKWFDELYDRIFVRPARWVGTALWKG--  
... FDDWLIDQTLVEGLG--RRVRQVTGYVTRLQSGYLYHYAFAMLIGVAALITWAI ASGLLG-----  
467 >WP_013421165_NuoL_Rhodomicrobium_vannielii  
468 MY-----QAI VLLPLIGALCAGFFG----RSLGDKNSGFLTSALVLSAALS WLALYQVGI--  
... EGQEARITLF--PWIGVGD LQTSW SLRIDTLTAVMLVVNTVSALVHIYSVGYMSDDDR-----  
... QPLFFSYLSLFTFAMLSLVTADNLVQLFFGWEGVGLASYLLIGFWYQRESANAAA IKA FV VNRVGD FGF AIGIF  
... AIWFIFRDVNF--DTIFAAAKEHQATT----  
... IPFFGYQVPALDFICLFL FMGAMGKSAQFL LHTWLPDAMEGPTPVSAL IHAATMVTAGVFMVARLSPLFELSPI  
... ALLVVT CVGAITAFFAATVGLAQNDIKRVIAYSTCSQLGYMFVALGLSAYGA AVFHLFTHAFFKALLFLGAGSV  
... IHALHGEQDLRKMGGMRKAIPFTFGMMVIGTSLTG--FPF-----  
... TAGYFSKDMIIEVAEVSHSAVGT VYWMLIFAAFLTSFYSWRLIFMAFYGEPKDH--HA--FEHA-----  
-----  
... HESPPVMTGPLLILAAGALFAGLIFAPYFVGA--DYAQ---FW--RSSLLFLHG---  
... WHEPHVADVFMKWLPTIVMAGGFGVAYWAYISS-----  
-----PGIPAWTVKTFKPIHAFLYNKWFDELYDWIFVRPTRWIARVLWKY--  
... GDGAIIDGLGPDGVA--ASVIATTKRVVRIQTGFVYTYAFVMLIGVTVLITWFAYLYRGALFTL--  
469 >WP_119060945_NuoL_Dichotomicrobium_thermohalophilum  
470 MY-----TAIVLLPAISALFVGLFG----RYIGNAASGWTASTLLVISAILSWIAFVSVGF--  
... DGETARVTLF--EWIVSGDMVAEWSLRIDTLTAVMLVVVTTVSSLVHIYSIGYMEHDEG-----
```



```
470... QPRFFAYLSLFTFAMLALVTADNLLQLFFGWEGVGLASYLLIGFWYHKPSANAAAIAKAFVNVRVGDFGFLLGIF
... AIFASFGTISL--DAIFAAAPGKVDET----
... IHFLGQDFDLLTVACLLLFMGAMGKSAQFLHTWLPDAMEGPTPVSALIIHAATMVTAGVFLVARMSPLELAPV
... ALTVVTAFGAITAFFAATVGIAQNDIKRVIAYSTCSQLGYMFVALGVGAYSVGIFHLFTHAFFKALLFLGAGSV
... IHALHEEQDLRKMGGIARKIPLTWAMMLIGTLALTG--FPL-----
... TAGYYSKDAVVEAAYAGANPVAMYAFWATVIAAFLTSAYSWRLMFMAFHGQPRMGDEA---LGKV-----
... -----
... HESPPVMTGPLIALAIGALGAGFAFKTFFIGD-GYEA---FW--
... GASLFTAEGNTILYDLHHVPGWVVASPSVAMLIGLAVAWLSYIAF-----
... -----
... PAVPGVLTRAFKPIHLFLLNKWYFDELYDWIFVRPYKWLSRQLWKV-GDGAIIDGLGPDGIS-
... ARVTDITARVVRLQTGFVYHYAFIMLVGVALIISYFLYLILSRGGF----
471 >WP_161140169_NuoL_Propylenella_binzhouense
472 MY-----SAIVFLPLFGAIIAGLIGDAAHGGHGPAAEIVTSAFLVICAVLSWIAFFRVGA--
... NTGEAFTVPVL-RWIESGALAAGWALRVDTLTAVMLVVVTTVSALVHVYSIGYMSHDPH-----
... RPRFFAYLSLFTFAMLMLVTADNLLQMFVGWEGVGLASYLLIGFWYHRPSANAAAAMKAFIVNVRVGDFGFALGVF
... GVFVLFSGVEF--
... SSIFANTQAVAEGGLRIFGSVFTGEGALTVVCLLLFMGAMGKSAQVPLHTWLPDAMEGPTPVSALIIHAATMVTA
... GVFMVARLSPLFEHAPDALIVVTVVGAITAFFAATVGLVQNDIKRVIAYSTCSQLGYMFVALGLGAYSVAIFHL
... FTHAFFKALLFLGAGSVIHAVSDEQDMRRMGGLRRVIPVTYAMMLVGTALALTG--FPF-----
... TAGYYSKDAIIEAAYAGHTTAAGLAFVLTVVAAAFSTFYSWRLVFMTFHGKPRASAEV--MEHA-----
... -----
... HESASVMLIPLYVLAAGALLAGIAFSGLFIGE-AQEG---FW--
... KGALFFGPENEILEEMHHAPFWVGISPFVAMVLGFLVALWFYILS-----
... -----
... PDTPRRIGEQUEGLYRFLLNKWYFDELYDFLVFRPVMALGRFLWKR-GDGWLIDGFGPDGVS-
... ARVLDVTRNVVKLQTGYVYHYAFAMLIQVAILVTWMMFAG-----
473 >WP_026380115_NuoL_Afifella_pfennigii
474 MY-----TAIVFLPLLGAIIAGLIGEHHPAAAGSRAAEMITSSLLVISAVLSWIAFFDVAL--
... GERQGFSSVSL-TWVQSGDLAADWTLRIDALTAVMLVVVTTVSALVHIYSIGYMSHDPH-----
... RPRFFAYLSLFTFAMLALVTADNLLQMFVGWEGVGLASYLLIGFWYQRPSANAAAIAKAFIVNRIGDFGFLLGIF
... GLFVLFSGISF--
... DTIFANAAAVARGEVEVFGTVWSGEAALTVVCLLLFLGAMGKSAQLPLHTWLPDAMEGPTPVSALIIHAATMVTA
... GVFMVARMSPVFEFSVDALTVVTFIGAATAFFAATVGLVQNDIKRVIAYSTCSQLGYMFVALGIGAYSVAIFHL
... FTHAFFKALLFLGAGSVIHAVSDEQDMRKMGGLRKIPLTYALMLVGTALALTG--FPM-----
... TAGFFSKDAIVEAAFVGHNPMAISIAFVLLVAAAFSTFYSWRLIFMTFHGKPRASSEV--MSHV-----
... -----
... HESPQVMLMPLYILAAGALFGLLFAAAFIDP-ERSVE--FW--
... KGSIFTAPGNDILEELHHVPAWVKASPIIAMALGFLVSLFFVYVLR-----
... -----
... PETPKALAQRMGSLYRFLLNKWYFDELFDAMFVRPAFALGRFLWRR-GDEGTIDRLGPDGIS-
... ARVVDITGRVVKLQSGYLYHYAFVMLIGVAVLVTWMMFAG-----
475 >WP_099555500_NuoL_Hartmannibacter_diazotrophicus
476 MY-----SLIVFLPLVGFLLIAGAIGHHHDAAPGSRPAELITTCLMGVVAILSVAFFQVAL--
... GESETLTPVPL-SWITSGTLSVDWAFRIDTLTAVMLVVVNTVSFLVHLYSMGYMSHDPH-----
... RPRFFAYLSLFTFAMLMLVTADNLLQMFVGWEGVGLASYLLIGFWYKPSACAAAMKAFIVNVRVGDFGFLLGIF
... GIYLFHTISF--DAIFANAHSLEGAS---
... VTFLGSEWDAATIICLLLFMGAMGKSAQFLHTWLPDAMEGPTPVSALIIHAATMVTAGVFMVARMSPVFEMSET
```

```
476... ALTVVTFIGATTAFFAATVGLVQNDIKRVIAYSTCSQLGYMFAALGVGAYPIAVFHLFTHAFFKALLFLGAGSV
... IHAVDGEQDMRKMGGRLTKVPVTFWMMTIGTLALTG--FPF-----
... TAGYYSKDAIIEATYVGTNAFSGYAYGMLVIAAAFTSFYSWRLAFMTFFGKPRASAEV--MKHA-----
... -----
... HESPQVMLVPLYVLAAGALLAGILFHGSFAGE--AMSELTEFW--
... KGAVALPEGEHVLEAMHHVPFLAAFAPTIAMVLGFLVALHFYILN-----
... -----
... PEAPKQLAKRHDALYQFLLNKWYFDELYEILFVRTAKWIGTKLWKI--GDGTIIDGFGPNGVA--
... ARVMDVTRVRLQGTGPLYHYAFAMLIGVAALITWAMFYA-----
477 >WP_132806041_NuoL_Tepidamorphus_gemmatu
478 MY-----SAIVFLPLIGAILAGLIGDHHEAAEGSRAAELITTGCLIVSAILSWVSFVDVGI--
... NGNDARVQVL--PWVVSGLTAEWAFRIDTLTVVMLVVVTTVSALVHMYSIGYMSHDPH-----
... RPRFFAYLSLFTFAMLMLVTADNFLQMFEGWGLASYLLIGFWYQRPSANAAAIKAFVNVRVGDFGFALGIF
... GVFMIIYGSISF--DAVFANAADATGRT---
... IHIFGADIDALTMCLLLFMGAMGKSAQFLHTWLPDAMEGPTPVSALHAATMVTAGVFMVARLSPMFESET
... ALTVVTFIGATTAFFAATVGLVQNDIKRVIAYSTCSQLGYMFAALGVGAYSIGIFHLFTHAFFKALLFLGSGSV
... IHAMSDEQDMRRMGGLRKLIPFTYWMMIIGTLALTG--FPL-----
... TAGWVSKDAIIEATYVGHNPAGYAFGLTTFAALLTAFYSWRLIFMTFHGKSRAPSDV--LHHV-----
... -----
... HESPPVMLVPLAVLAVGALGAGLAFKSLFMGE--GYEA---FW--
... RGALYLSEENHILHDMHEVPALIVWTPTVAMLLGLGLAWFYFVVS-----
... -----
... PATPGALARQFDVLYRFLNKWYFDEIYDFLFVRPTKWVGRFLWKK--GDGWLIDGFGPDGIS--
... ARVLDVTRKVVRLQGTGPLYHYAFAMLIGVTALITWYMFAGGVR-----
479 >WP_115689547_NuoL_Pseudolabrys_taiwanensis
480 MY-----QAIIVFLPLLGAILAGLIGPVEPAAVGSRTAELITTTLLMISMVLSWIALVQVGF--
... GGQDIREPLM--PWIVAGDLKVDWVLRIDTLTAVMLVVVNSVSAFVHLYSMGYMHEEPY-----
... RPRFFAYLSLFTFAMLMLVTSNQLVQMFEGWGLASYLLIGFWYQKPEACAAAIKAFVNVRVGDFGFALGIF
... SIFYLTGAIDF--DTAFAQAPSLVGKT---
... ILFFGWHDALTLTCLLLFMGAMGKSAQFLHTWLPDAMEGPTPVSALHAATMVTAGVFMVARLSPLFELSPN
... AQTFTVFIGATTAIFAATIGLVQNDIKRIVAYSTCSQLGYMFVAMVGGYSIGMFHLFTHAFFKALLFLGSGSV
... IHAMHHEQDIRNMGGLKDRIPFTYAVMIVGTLALTG--FPL-----
... TAGYFSKDAIIEAAYVGKNPMALYAFACVVVAALLTSFYSWRLVFKTFHGEPHDR--QH--WKDA-----
... -----
... HESPLVMLIPLAFLAIGSFAAGFPFKEIFAGH--GVEH---FF--
... RGSLTFGKDNHILEEMHHIPLGITTLPTVMMAVGFVIAWVFYIKR-----
... -----
... PDIPVELARQHRPLYLFLNKWYFDELYDVIFVRPVKWLGRTLWKR--GDGWLIDGFGPDGVS--
... ARVLDITRGVVRLQGTGPLYHYAFAMLIGAALLITWFMFSVH-----
481 >WP_029040010_NuoL_Cucumibacter_marinus
482 MQ-----AFLFQVIVLAPLLGALVAGLLGRSIGHRPAEIIITSSLLVLAGLCSWIVFLGILF--
... AGGGAEHGAEAAASWVHVGDLSLDWMIRVDTLTGVMVVVTTVSALVHIYSIGYMHEDPH-----
... RARFFAYLSLFTFAMLMLVTADNFLQLFFGWEGVGLASYLLIGFWYKKPSANAAAMKAFIVNVRVGDFGFALGIF
... GAFMMLGSINF--DEAFAQVSHMEGVT---
... IDFLWGQWDAMTVICLLFLGAMGKSAQFLHTWLPDAMEGPTPVSALHAATMVTAGVFMVARLSPMFEASEV
... ALTVVIYVGAITAFFAATVGLVQNDIKRVIAYSTCSQLGYMFVALGLGAYSAGIFHLFTHAFFKALLFLGAGSV
... IHAMHHEQDMRKMGGRLTKIPLTYAMMMIGTLALTGVGIPGTP-----
... IGFAGFFSKDAIIEAAGAHTAAGDFAFWMLVIAAVFTSFYSWRLVHLTFHGKTRASRET--YSHA-----
```

```
482... -----  
... HESPNVMMIPLYVLAAGAVLSGVL FHEVFFAN-AEHVTA--FF--RNAIVVDEH--  
... VIEEAHHVALWVKWSPAIAIMIIGFLVAWQFYIRR-----  
... -----PDLPKALAAEHSGLYQFLLNKWYFDELYDFIFVRPAKWLGALWRG--  
... FDDWLIDGIIVGGLA-ARVKDVTDRVRLQSGYLYHYAFAM LIGVAALITWAIATGGLL-----  
483 >WP_026790169_NuoL_Pleomorphomonas_oryzae  
484 MY-----SLIVFLPLIGFLIAGAIGAVEPAAPGSR IAE LVT TGLLFVSAVFSWVAFISVGF--  
... SEHETQSIQVL-SWIHSGAMQVDWAFRVDLTLVVM LVVTTVSSLVHLYSIGYMAEDPD-----  
... RPRFFAYLSLFTFAMLMLVTADNLVQMFFGWEGVGLAS YLLIGFWYKKPSASAAA IKA FVVNRVGD FGFMLGIF  
... GIFMMFGTISL--TDIFANVATVEGKT----  
... IHFLWGNWDAITVICLLL FMGACGKSAQFL LHTWLPDAMEGPTPVSAL IHAATMVTAGVFMVARLSPLFDLSPT  
... ALTVVTLVGAVTAFFAATVGLVQNDIKRVIAYSTCSQLGYMFVALGVGAYGAGIFHLFTHAFFKALLFLGAGSV  
... IMASHHEQDMRSMGGLRNKIPLTFWAMTLGTLAITGVGIPGTE-----  
... IGFAGFLSKDAIIESAFAGHNPVSGFAAVLLVIAAGFTSFY SWRLVFLTFFGASRAPKDV--YDHA-----  
... -----  
... HESPLVVL IPLGVLSL GAVLAGMVFYGHYVGE-EQAE---FW--  
... KGSLFYGPDNHILHAMHDVSFLVKASPFLAMLVGLAIAYWFYILN-----  
... -----  
... PALPKRLAAALPGLYKFLLNKWYFDELYDLIFVRPAFAIGRLFWKT-GDGAIIDGLGPNGIA-  
... ARVQDVTARVVRLQTGYVYHYAFAMVIGVAALITWAMFAGGQ-----  
485 >WP_181701862_NuoL_Chthonobacter_albigriseus  
486 MY-----SLIVFLPLIGFLIAGAIGAAEPAAPGSR ISELVTTGLMFVSAFLSWISFISVGF--  
... GEAETLRVPVL-EWMTSGALVVDWSFRIDTLTAMMLVVTTVSSLVHLYSIGYM HEDPD-----  
... RPRFFGYLSLFTFAMLMLVTS DNLVQMFFGWEGVGLAS YLLIGFWYKKPSAVAAA IKA FVVNRVGD FGFALGIF  
... GV FVMFGSISF--DAIFANTEAVAGKT----  
... MVFLGHEFDAMTVICLLL FMGAMGKSAQFL LHTWLPDAMEGPTPVSAL IHAATMVTAGVFMVARLSPLFELSHT  
... ALTVVTLVGATTAFFAATVGLVQNDIKRVIAYSTCSQLGYMFVALGVGAYGAGV FHLFTHAFFKALLFLGAGSV  
... IHAMHHEQDMRNMGGLRKKIPVTFWVMVIGTLAITGVGIPLTH-----  
... IGFAGFLSKDAIIEAAYAGHNAFSGYAFGLTVLAAAF T SFY SWRLIFLTFFGETRADHHT--FDHA-----  
... -----  
... HESPRVMLVPLAVLSVGAVLAGMVFYDAFVGE-AQAE---FW--  
... KGSVFYGAENHILHAMHEVPAWVKASPF FAMLAGLVAYWFYIAN-----  
... -----  
... PEMPKQLAARHDALYAFLLNKWYFDELYDILFVRSAKAIGRFLWKT-GDGTVIDGLGPNGIA-  
... ARVQDVSARVVRLQTGYVYHYAFAM LIGVAALITWAMFGGTH-----  
487 >WP_131310004_NuoL_Sicilibacillus_lacustris  
488 MF-----TAIVFLPLLGLF LIAAAMPADHREAPFARPAELVTSGFLLIAALLSWVAFVQIGL--  
... AEHAATVKIAVLPWIHTAGLNVDWSLRIDTLTAVMLVVTTV SALVHVYSIGYMSHDPD-----  
... RPRFFAYLSLFTFAMLMLVTADNLVQMFFGWEGVGLAS YLLIGFWFQKPSANAAA IKA FVVNRVGD FGFILGIF  
... GVFWLFGSIDL--DTIFASVGTMKGKE----  
... IVFLGGHVDAMTTLCLLL FLGAMGKSAQFL LHTWLPDAMEGPTPVSAL IHAATMVTAGVFMVARLSPLFEQAPA  
... ALAVVTLVGAVTAFFAATVGLVQNDIKRVIAYSTCSQLGYMFVALGVGAYGPGIFHLFTHAFFKALLFLGAGSV  
... IHAVSGEQDMRKMGLGPHIKLTYALMIIGTLALTGVGLPMTE-----  
... IGFAGYNSKDAIIEAAYVGDNI FASLAFGLLVIAALFTSFY SWRLIFLTFWGAPRAPKDV--MDHV-----  
... -----  
... HESPSVMTVPLMVLALGAVIAGMVFSSVFIGH-GYGE---FW--  
... KGSIFTSGGNHVLEHMHHPVAVKFA PFVAMLLGLGTAYVFYVAK-----  
... -----
```

```
488... PELPGQLAASQPGLYRFLLNKWFDELYDFLFVKPAKAFGRFLWKE-GDGRVIDGFGPDGVS-
... ARVVQITGRVVALQSGYLYHYAFAMLIGVALLATMVMFGGVR-----
489 >WP_075214650_NuoL_Mongoliimonas_terrestris
490 MY-----SLIVFLPLVGFLIAGAIGAAEPAAPGSRIAELVTTGFLIVSCLLSWVAFLT VGF--
... GDGETFRVPVA-AWMTSGALVVDWSFRIDTTLTVMMLIVVTTVSSLVHAYSIGYMSEDPG-----
... RPRFFAYLSLFTFAMLMLVTSNQLVQMFQWEGVGLASYLLIGFWYKKPSASAAAIKAFVNVNRVGDGFGFALGIF
... GVFAVFGSVGF--DAIFANTEAVAEQS---
... MIFLGAEWHALEIITFLLFIGAMGKSAQFLLHTWLPDAMEGPTPVSALIIHAATMVTAGVFMVARLSPLFEHAHG
... TLTFVTFIGATTAFFAATVGLVQNDIKRVIAYSTCSQLGYMFVALGVGAYGAGVFHLFTHAFFKALLFLGAGSV
... IHAMHHEQDMRKMGLRSKIPVTYWTMLIGTLAITGVGIPLTH-----
... IGFAGFLSKDAIIESAYAGHNSFAGYAFMLTLIAAMTSFYSWRLIFLTFFGQTRADHHT--FEHA-----
... -----
... HESPRVMLIPLIVLSVGAVLAGMVFYEA FVGE-AQGE---FW--
... KGALLYGPENHILHDMHEVPAWVKASPPFAMLFGLGIAYWFYIAD-----
... -----
... PEQPKRLAARHDALYQFLLNKWFDELYDLLFVRSKALGRFFWKA-GDGMVIDGLGPNQVA-
... ARVQDVSARVVRLQTGYVYHYAFAMLIGVAALITWAMFAGGIN-----
491 >WP_083255387_NuoL_Methylobrevis_pamukkalensis
492 MY-----SLIVFLPLVGFLIAGAIGDHHEEAPGSRPAELVTTGLMAVTALLSWVAFFSVAF--
... GEGEAFTVPVL-SWIHSGALATEWAFRIDTTLTVMLVVVNTVSFLVHLYSMGYMSHDP A-----
... RPRFFAYLSLFTFAMLTLVTSNQLVQMFQWEGVGLASYLLIGFWYQKPSANAAAMKAFVNVNRVGDGFGFLGLF
... GVVVLFNSISF--DAIFANVGSLEGAQ---
... LTFLGSSWDAATIVCLLLFMGAMGKSAQFLLHTWLPDAMEGPTPVSALIIHAATMVTAGVFMVARMSPVFEMSHT
... ALTVVTFIGATTAFFAATVGLVQNDIKRVIAYSTCSQLGYMFVALGVGAYPIAVFHLFTHAFFKALLFLGAGSV
... IHAVSGEQDMRKMGLRRTVIPVTFWMMTIGTLALTG--FPF-----
... TAGFYSKDGIIEAAFVGENAFAGYAFGMLVIAAVFTSFYSWRLAFLTFFGKPRASAEV--MKHA-----
... -----
... HESPQVMLIPLYVLAVGALFAGVAFSGAFMGE-GVEE---FW-
... KQSLYLPHGEHSILEAIHHVSFWKISPFIAMLIGFAVAVYFYIVN-----
... -----
... PEAPKQLAARHDALYQFLLNKWFDELYDILFVRSKAWIGTKLWKV-GDGRIIDGLGPDGIA-
... ARVQDVTTTRVVRLQTGYLYHYAFAMLIGVALLVTWAMFYAGGM-----
493 >WP_023432137_NuoL_Lutibaculum_baratangense
494 MY-----SAIVFLPLIGAIIGAIGDGHDDHHGPGAAEYITTGALILSAILSWVAFFTVGL--
... GEEPVHVQVM--PWVVSGLDAFDWAFRIDTTLTVMLVVVTTVSSLVHVYSIGYM SHDAH-----
... RPRFFAYLSLFTFAMLMLVTADNLVQLFFGWEGVGLASYLLIGFWYTRPSANAAAIAKAFVNVNRVGDGFGFSLGIF
... AVFLVYGSVNF--EVIFANAADAEGMT---
... LSFLGGEFDALTVICLLLFMGAMGKSAQFLLHTWLPDAMEGPTPVSALIIHAATMVTAGVFMVTRLSPLFELAPT
... ALAFVTFIGATTALFAATIGLVQNDIKRVIAYSTCSQLGYMFVAIGVGAYGAAIFHLFTHAFFKALLFLGSGSV
... IHAMSDEQDMRRMGGLRKHIPLTYWMMVIGTLALTG--FPF-----
... TAGFISKDAIIESAFAAHGTFAVYAFALTLFAAALTSFYSWRLIFMTFHGKPRASADV--MHHV-----
... -----
... HESPLVMTVPLMILAVGALFSGLAFQGLFIGE-GYED---FW--
... KQAIFLGSDNDILHEMHEVSALVVWSPTVAMIIGFGLAYLFYIRR-----
... -----
... PSIPVALAKQFDLVYLFLLNKWFDELYDLIFVKPSFWLGRVFWKK-GDGWLIDGFGPDGIS-
... ARVLDVTRQFVRLQTGYLYHYAFAMLVGVTALITWYMFAGGAH-----
495 >WP_096356271_NuoL_Variibacter_gotjawalensis
```

```
496 MY-----QAI VFLPLL GAILAGAI GPAEPA AVGSRAAEVITS ALLVTS AVLSWITLVQVGY--
... GHQEARIVLF--P W MVSGDLN VSWALRIDTLTAVMLVVVTTVSSLVHIYSIGYM HEDPH-----
... RPRFMAYLSLFTFAMLMLVTS DNLAQLFFGWEGVGLASYLLIGFWFKPTANAAA IKA FVVNRVGD FGFALGIF
... ALFAVTGSINF--DQIFAEGPNLANKT----
... IHFLSWDVNALTVICLLL FMGAMGKSAQFL LHTWLPDAMEGPTPVSAL IHAATMVTAGVFMVARLSPLFEYSPT
... ALTVVTFFGATTAF FAATIGLVQNDIKRVIAYSTCSQLGYMFVAMGVGAYS VGMFHLFTHAFFKALLFLGSGSV
... IMAMHHEQDIRNMGGLRKKIPFTY WMMVIGTLALTG--FPF-----
... TAGYFSKDAIIEAAYAGKNPMAIYGFMMTVIAALLTSFY SWRLIFKTFH GKPHDQHHY--DEA-----
... -----
... KESPLVVLVPLGILAVGSI AAGFVFKEVFIGH-HVAE---FF--
... RESIKIIPENHILHDMHEV PKWVVASPFVMMVIGFLVAYQFYIRR-----
... -----
... PDLPVGLAKQQPLL YNFLLNKWFDELYNYIFVKPALWLGR LFWKR-GDGTIIDGFGPDGVS-
... ARVADVTRGVVRLQTGYLYHYAFAMLIGVAAFITWFLFSGTTGGAH---
497 >WP_073629719_NuoL_Pseudoxanthobacter_soli
498 MY-----HLIVFLPLL GFLIAGAI GDHHAAPGSRAAEIITTSLLLVSAILS SWVAFFSVGV--
... GETQVPTVDLL-TWVTS GSLSFNWALRVDTLTVVMLVVVNTV SMLVHLYSMGYMAHDEH-----
... RPRFFAYLSLFTFAMLMLVTS DNLMQMFFGWEGVGLASYLLIGFWFQKPSACAAA IKA FVVNRVGD FGFLLGIF
... ALVYMTGVLQF--DQVFAAAPSLAEKS---
... IHFLGGDYN AVTVICLLL FMGAMGKSAQFL LHTWLPDAMEGPTPVSAL IHAATMVTAGVFMVARMSPLFSL SAD
... ALTFVTLIGATTAF FAATIGCVQNDIKRVIAYSTCSQLGYMFAALGVGAYNVAVFHLFTHAFFKALLFLSAGSV
... IHAVGGEQDMRKMGLRKTVPFTFWAMLFGGLALTG--FPL-----
... TAGYFSKDAIIEATFVGTNSMHVYAFWMTTIAALLTAFYTW RQMFMTFFGKPRASAEV--MAHA-----
... -----
... HESPLVMLIPLGVLSL GALFGGIVFHNLFIGE-SFEE---FW-
... KHALDMESVEHVLHAMHTEVPGWARWAPT VAMLIGLFSAWYAYIRV-----
... -----
... PTLPAALAARNKGLYEFLLNKWFDELYDFLFVRPAKRLGSFLWKR-GDGWLIDGFGPNGVS-
... ARVVDITNRVRLQTGYIYHYAFVMLIGIALLVTWSMFHGGGNP-----
499 >WP_01147286_NuoL_Rhodopseudomonas_palustris
500 MI-----QAI VFLPLIGALLAAAIGPVETPAVGSRAAE LITGLLLVAAGLSWLALVDVGF--
... MHH DARIPLF--PWINS GDLQVAWSLRVDTLTA VMLVVVNTVSSLVHLYSIGYMNEDPH-----
... RPRFFAYLSLFTFAMLMLV TADNLVQMFFGWEGVGLASYLLIGFWYQKPEANAAA IKA FVVNRIGD FGFLLGIF
... AIFMLVGSIDF--ETIFAAAPGLTGKT---
... INFFGWHADALTTLTCLFL FMGAMGKSAQFL LHTWLPDAMEGPTPVSAL IHAATMVTAGVFMVARLSPLFELAPD
... AQNVVIFFGATTAF FAATIGLVQNDIKRIVAYSTCSQLGYMFVAMGTGAYS VGMFHLFTHAFFKALLFLGSGSV
... IHAMHHEQDIRKMGGLKDKIPFTYIVMVIGTLALTG--FPL-----
... TAGYFSKDAIIEAAFASHKSVAFYGF LMTVIAAGLTSFY SWRLIFKTFHGT PHDQ-KN--YDAA-----
... -----
... HESPYWMLIPLVVLAAGS ILAGFPFKEVFAGH-GVGE---FF--RESLKMNP HII--
... DEMHHIPVAVAYLPTAMMALGFVVSWMFYIRK-----
... -----PYLPVELANQHQLLYKFLLNKWFDELYDLIFVRPAKWIGRFLWKA-
... GDGTIIDGLGPDGIS-ARVLDITRGAVRLQTGYLYHYAFAMLVGVAGLITWFM LGGGR-----
501 >WP_143577931_NuoL_Tardiphaga_sp._vice278
502 MI-----QALVFLPLIGAILAGLIGVAEPAAAGSRAAE LITSTLLVSAALSWM TLVDVGF--
... LHHDVRVVL M--PWITSGDLQLSWTLRVDTLTA VMLVVVTTVSALVHIYSLGYMEDDPN-----
... RPRFMGYLSLFTFMMLMLV TADNLLQLFFGWEGVGLASYLLIGFWYQKPSANAAA IKA FVVNRVGD FGFLLGIF
... AIFMMVGSTDF--DTIFAALPGLTGKT---
```

```
502... INFFGWQADALTLIGLLLFMGAMGKSAQFLHTWLPDAMEGPTPVSALIIHAATMVTAGVFLVARMSPFLFELAPN
... AQAVIMLVGATTAFFAATIGLVQNDIKRIVAYSTCSQLGYMFVALGAGGYSIAMFHLFTHAFFKALLFLGSGSV
... IYAMHHEQDIRKMGGWLWRKIPFTYAMMVGITLALTG--FPL-----
... TAGYFSKDAII EAAYVSTNPFALYGFLMTIVAAGLTSFYSWRLIFKTFHGHAPHDQ-KH--YEAA-----
... -----
... HEAPLVMLVPLGVLAAGAILAGFPFKELFAGH-GVEE----FF--RDSLKNHPHLL---
... DEMHHIPAMIANLPTVMMMAAGFLVSYLFYIRR-----
... -----PYLPVELAGQHPLLYKFLLNKWFDELYDLIFVRPAKWLGFRFLWKV-
... GDGKIIDGLGPDGIS-ARVLDITRGAVRIQTGYLYHYAFAMLIGVAGLITWFI FGLGGH-----
503 >WP_068730882_NuoL_Tardiphaga_robiniae
504 MI-----QALVFLPLIGALIAGFIGVAEPAALGSRAAELITAGLLVVS AVLSWMTFVDVAF-MHHDARIVLL
... ---NWINS GDLQLSWTLRVDTLTAVMLVVVTTVSSLVHIYSLGYMEDDPN-----
... RPRFMAYLSLFTFMMLMLVTADNLLQLFFGWEGVGLASYLLIGFWFKKPSANAAA IKA FVVNRVGD FGFLLGIF
... ALFMLVGSTDL--DTIFASAPSLTGKT---
... INFFGWHADALTLTCLLLFVGAMGKSAQFLHTWLPDAMEGPTPVSALIIHAATMVTAGVFMVARMSPFLFELAPN
... AQAVVMLVGATTAFFAATIGLVQNDIKRIVAYSTCSQLGYMFVALGTGAYSVAMFHLFTHAFFKALLFLGSGSV
... IYAMHHEQDIRKMGGWLWNKIPFTYAMMTIGTLALTG--FPF-----
... TAGYFSKDAII EAAYASHNPF AFY GFLMTVVAALLTSFYSWRLVFKTFHGE PHDK-KH--YDAA-----
... -----
... HEAPLWMLVPLAVLGIGSFAAGFPFKELFAGH-HVGE----FF--RESLKMNP HII---
... EEMHHIPGWVPYVPTVMMVLGFLISYLFYVRK-----
... -----PYLPVELANQHPLLYKFLLNKWFDELYEII FVRPAKWIGHFLWKK-
... GDGMIIDGLGPDGVS-ARVLNITRGVVKLQTGYLYHYAFAMLIGVAGLITWFI FGLGGQ-----
505 >OJY10283_NuoL_Rhizobiales_bacterium_62-47
506 MI-----QAI VFLPLL GAILAGLIGPAEPPAAGTGAELITTALLFVSAALSWITFVNVGF--
... LKQDLLVHVL--PWISSGDLQIAWSLRVDTLTAVMLVVVTTVSSLVHLYSVGYMDEDPH-----
... RPRFFAYLSLFTFAMLMMLVTSDNLVQLFFGWEGVGLASYLLIGFWYQKPSANAAA IKA FVVNRVGD FGFSLGIF
... AVFMLIGSTDF--ETIFHAAPGLTGKT---
... INFLGWHADALTLTCLLLFMGAMGKSAQFLHTWLPDAMEGPTPVSALIIHAATMVTAGVFMVARLSPLFELAPN
... AQAFVMLIGGTTAFAATIGLVQNDIKRIVAYSTCSQLGYMFVAMGAGAYSVGMFHLFTHAFFKALLFLGSGSV
... IYAMHHEQDIRNMGG LKDKIPFTYVAMVIGTLALTG--FPL-----
... TAGYFSKDAII ESAFVAQNPF AFY GFLMTVIAACLTSFYSWRLIFKTFHGRPHDQ-HH--YEAA-----
... -----
... HEAPLWMLVPLGVLAAGSILAGFPFKELFAGH-GIEE----FF--RESVKMHP HII---
... EEMHHIPATIAYLPTVMMVVG FVVAWL FYIQR-----
... -----PYLPVELASQHPLLYKFLLNKWFDELYDVIFVRPAKWLGFRFLWKK-
... GDGFVIDGF GPDGVS-ARVLDVTRNVVRLQTGYLYHYAFVMLIGVAGLITWFMFGLGGQ-----
507 >WP_184082102_NuoL_Afipia_massiliensis
508 MI-----QAI VFLPLL GALIAGAVGPVEPPAAGSRTAEVTTALLLISAALSWMALVDVGF--
... LHHDARVQLF--TWIGSGDLVWNWALRVDTLTAVMLVVVTSVSSLVHLYSIGYM HEDPN-----
... RPRFMAYLSLFTFAMLMMLVTADNLVQLFFGWEGVGLASYLLIGFWYQKPSANAAA IKA FVVNRVGD FGFALGIF
... AVFMLVGSTDF--DTIFAAA PGLTGKT---
... IHFFGWDVDALTLTCLLLFMGAMGKSAQFLHTWLPDAMEGPTPVSALIIHAATMVTAGVFMVARLSPLFELAPN
... AQAAVMLIGATTALFAATIGLVQNDIKRIVAYSTCSQLGYMFVAMGAGAYSVGMFHLFTHAFFKALLFLGAGSV
... IHAMHHEQDIRAMGG LKDKIPFTYITMVVGT LALTG--FPL-----
... TAGYFSKDAII ESAFVAQNPF ALY GFLCTVIAAGLTSFYSWRLIFKTFHGE PHDK-EH--YEAA-----
... -----
... HESPYTMLIPLGVLAAGSILAGFPFKELFAGH-GIGE----FF--RESLKNHPKII---
```

```
508... DEMHHIPAMIAFLPTVMMVVGFIWSWLFYIRK-----  
-----PYLPVELANQHHPGMYRFLLNKWFDELYDFIFVRPTKWLGRFLWKK-  
... GDGAIIDGFGPDGVS-ARVLDVTRNVVRLQTGYLYHYAFAMLIGAAGLITWFI FGLGGQ-----  
509 >WP_100382102_NuoL_Afipia_broomeae  
510 MV-----QAI VFLPLIGAVLAGLIGAVEPPA QGSRAAELITTGLLIVSAVLSWITFFDVGF-MHHDVRIALF  
----QWINSGLDQVAWSLRVDTLTAVMLVVVTTVSSLVHLYSIGYMDEDPN-----  
... RPRFFGYLSLFTFAMLMLVTS DNLVQLFFGWEGVGLASYLLIGFWYQKPSANAAA IKA FVVNRVGD FGFALGIF  
... AIFALIGSTDF--ETIFAGAPGLTGKT---  
... IDFFGWHADALTLTCVLLFMGAMGKSAQFLLHTWLPDAMEGPTPVSAL IHAATMVTAGVFMVARLSPLFELSPN  
... AQAVVMFFGATTAFFAATIGLVQNDIKRIVAYSTCSQLGYMFVAMGAGAYSVGMFHLFTHAFFKALLFLGSGSV  
... IYAMHHEQDIRKMGLWRKIPYTFVTMCIGTLALTG--FPL-----  
... FAGYFSKDAIIESAYASHNPFSTYAYLLTVGAAGLTSFY SWRLIFKTFGEPHDR-EH--YEAA-----  
-----  
... HESPIWMLIPIGVLAAGSILAGFPFKELFVGH-GAEE---FF--RDSLKMNPQIF--  
... EDMEHMPRL LGFMPFIMMVLGLAVAYLFYIRR-----  
-----PYLPEELASQQPMLYQFLLNKWFDELYDLIFVRPAKRIGRFLWKF-  
... GDGYIIDGFGPDGVS-AWVLDVTRNVVKLQTGYLYHYAFAMLIGVAGLITWFMFGVGGQ-----  
511 >WP_111383984_NuoL_Rhodoplanes_piscinae  
512 MY-----QAI VFLPLLGLIAAAIGAAEPAAWGSRPAEVVTTTLLFVSMALSWIAFARVGF--  
... GGLEVREAIA--PFIFSGELKVDWALRVDTLTAVMLVVVTTVSALVHLYSIGYMVDDPG-----  
... RPRFFAYLSLFTFAMLMLVTADNLVQLFFGWEGVGLASYLLIGFWYKKPSANAAA IKA FVVNRVGD FGFLLGIF  
... AVFVVTAAVDF--DTIFAQAPALAGKP---  
... IPFLSWEVDALTVICLLLFMGAMGKSAQFLLHTWLPDAMEGPTPVSAL IHAATMVTAGVFMVARLSPLFELAPT  
... ALAVVTFVGATTALFAATVGLVQNDIKRIVAYSTCSQLGYMFVAMGVGAYSVMYHLFTHAFFKALLFLGSGSV  
... IVAMHHEQDIRMMGGLSRKIPFTYAMMLVGTALALTG--FPL-----  
... TAGYFSKDAIIEAAFASDHAMAFYGFVCTVAAAALTSFY SWRLVFKTFHGQPHDR-HH--YDHA-----  
-----  
... HESPLPMLIPLGVLAAGSILAGLPFYDAFAGN-SVAA---FF--RGSLSVTG-IL--  
... EEMHHVPAMIAYLPTVMMVAGFAVAWVFYIKS-----  
-----PGIPRALARTFKPVYLFLLNKWFDELYDRIFVRPAMWLGRALWKG-  
... GDGRLIDGLGPDGVS-ARVLDVTRNVVRLQTGYLYHYAFAMLIGVAALATWFI LGGLR-----  
513 >WP_002711593_NuoL_Afipia_clevelandensis  
514 MI-----QAI VFLPLIGALIAGAIGPVEPPAAGSRAAEVITALLLISAALSWVTLVDVGL-LHHDARVQLF  
---NWIGSGNLVWNWAFRVDTLTAVMLVVVTSVSSLVHLYSIGYMHEDPN-----  
... RPRFMAYLSLFTFMMLMLVTADNLVQMFFGWEGVGLASYLLIGFWFQKPSANAAA IKA FVVNRVGD FGFLLIGIF  
... SVFLMVGSVDF--DTIFAAAPGLTGKT---  
... IHFFHWNIDALTLICLFLFMGAMGKSAQFLLHTWLPDAMEGPTPVSAL IHAATMVTAGVFMVARLSPLFELAPN  
... AQAFVMLIGATTAMFAATVGLVQNDIKRIIAYSTCSQLGYMFVAMGAGAYSVGMFHLFTHAFFKALLFLGAGSV  
... IHAMHHEQDIRAMGGLKDRIPFTYITMIGTLALTG--FPL-----  
... TAGYFSKDAIIESAFVAHNPFALYGFLCTVVAAGLTSFY SWRLIFKTFHGEPHDK-HH--YDAA-----  
-----  
... HESPYTMLIPLGVLAMGSILAGFPFKELFAGH-GVEE---FF--RESLKNHPHIL--  
... EEMHHIPAMIAFLPTVMMVIGFLVSWLFYIRK-----  
-----PYLPVELANQQPLL NFFLNKWFDELYEVIFVRPAKWLGRFLWKK-  
... GDGFIIDGFGPDGVS-ARVLDVTRNVVRLQTGYLYHYAFAMLIGAAGLITWFI FGLGGQ-----  
515 >WP_073051127_NuoL_Kaistia_soli  
516 MY-----SAIVFLPLIGAI IAGVIADHAPAAPGSRPAEIITTGFLFVSAILSWIAFLTITA--  
... PTGEPVFNVL-PWVTSGLTSFNWSFRIDTLTSVMLILVTTVSSLVHLYSWGYMAHDEH-----
```

516... RPRFFGYLSLFTFAMLMMLVTSNDLVQMFFGWEGVGLASYLLIGFWYQRPSANAAAIAKAFVNVNRVGDGFGFAVGIF  
... GVFVLFNSVDF--QTI FANAGGAVGTK----  
... MHFLSWDFDALTTVCLLLFVGAMGKSAQFLHTWLPDAMEGPTPVSALHAATMVTAGVFMVARMSPFLFGLSET  
... ALTMVTFFGATTCCFAATIGLVQNDIKRVIAYSTCSQLGYMFVGLGTGAFATGIFHLLTHGFFKALLFLCAGSV  
... IHAVSGEQDMRKMGLRKLHPITYWAMIAGTLAITG--FPF-----  
... TAGYFSKDAIEAAYVAENPLAGYAWFMTVAAALLTSFYSWRLIFMTFHGKPR--ASAEVMAHV-----  
-----  
... HESPKPMTIPLIVLSL GALFAGMIFENRFIGE--AYAE---FW--  
... KSALFTNPDNHVLHNMHEMSELVKLAPTVMVIGFLLTYWFYIRS-----  
-----  
... PEVVKRLAEEQPLL YRFLLNKWFDELYDFLFVRPVKWLGRFLWKK--GDGWLIDGFGPDGIS--  
... ARVVDVTKRVVRL ETGYVYHYAFAMLIGVSALVTWMMF--AR-----  
517 >WP\_111199216\_NuoL\_Aestuariativirga\_litoralis  
518 MN----TVLSAIVFLPLL GALIAGLFGGHHGAYDGPKWPMYLT TALLCISAVLSWYVFA--GF--  
... LHEPRAEKIELLHWINS GALSANWMIRVDTLTAVMLVVNTVSALVHIYSLGYMSHDES-----  
... QPRFFAYLSLFTFAMLMMLVTADNLVQMFFGWEGVGLASYLLIGFWYQRDSACAAAMKAFIVNRVGDGFGFALGIF  
... GCFLVFQTVDF--DTIFAAAPGMAGKP---  
... MQFLAWTPD TLTVLCLLLFMGAMGKSAQFLHTWLPDAMEGPTPVSALHAATMVTAGVFMVARLSPMFELAPH  
... AKDFVVVIGAITAFFAASVGLVQNDIKRVIAYSTCSQLGYMFVALGVGAYGAGVFHLFTHAFFKALLFLSAGSV  
... IHAVSGEQDMRKMGLGPFIKITFAMM VIGNLALTG--FPY-----TSGYFSKDAIEAAYVS---  
... GWGFAFWMLIVA AVFTSFYSWRLTFMTFNGQPR--ASREVMHV-----  
-----HESPPVMLVPLFVLAIGALFAGFFFKDYFIGH--DYKE---FW--  
... --GASLANGEMHEMHEEGMVPALVKWSPFIAMVLGFVVAWIFYIRD-----  
-----  
... TSIPKRLAEQHQL YRFLLNKWFDELYDVI FVRPTMWLGRFLWKK--GDGFLIDGFGPDGVS--  
... AVVNDVTKGVVRLQTGYLYHYAFAMMIGVAALISWFMF--GGAH-----  
519 >WP\_080917694\_NuoL\_Pseudaminobacter\_manganicus  
520 MY-----QAI VFLPLIGFLIAGLFG----NSLGAKASEAITSGLLVIAAVLSWVAFFT VGF--  
... GTGEVFTVPMM--TWFHAGGVDVSWALRIDTLTVVMLVVNTVSALVHIYSIGYMHHDPS-----  
... RPRFFAYLSLFTFAMLMMLVTADNLLQMFFGWEGVGLASYLLIGFWFKKPSANAAAIAKAFVNVNRIGDFGFLGIF  
... GVFVLFGLTDL--GTIFANAATYLP AE---  
... GAPAGD TVLNFLGYALLL FMGAMGKSAQMP LHTWLPDAMEGPTPVSALHAATMVTAGVFM LARLSPLFELSHT  
... ALTIVTFIGAFTAFFAASVGLVQNDIKRVIAYSTCSQLGYMFVALGVGAYGVAIFHLFTHAFFKALLFLGSGSV  
... IHAVSDEQDMRNMGLRKL IPTTYWMMVIGSLALTGVGIPLTV-----  
... IGTAGFFSKDAIEASVSHNPVAAFVMLVIGA--TSFYSWRLIFMTFHGKPR--ASEEVMHHV-----  
-----  
... HESPSVMLVPLYVLAAGALFAGVLFSTYFIGE--GYEA---FW--  
... KAALFTLPDNHILHEMHDVPLWVSLAPIVVTIIGFLVAYKFYITS-----  
-----  
... PEMPEQVAGRHRMLYAFLLNKWFDEIYEF L FVQPAKNIGHFLWKT--GDGKVIDGIGPDGIS--  
... ARVVDVTNRVVKLQTGYLYHYAFAMLIGVAALVTWMM L-----  
521 >WP\_018633546\_NuoL\_Neomegalonema\_perideroedes  
522 ML-----TAIVFLPLIGSLISGFFG----KRLGETLAQWIPTGLLFVSALFSWIVFAQTL----  
... GGEDRLVRLF--TWISSGELQTDWALRADPLTAVMLVVVTTVSALVHLYSVGYMAEDPS-----  
... KARFFSYLSFFTFAMLMMLVTADNFLQMFFGWEGVGVASYLLIGFWHQDSANAASMKAFIVNRVGDGFGFLGMF  
... GVFAVFRSLDF--DTVFAAAPQYAEST---  
... FHFLWMEVKVLEAICFL LFIGAMGKSAQFFLHTWLPDAMEGPTPVSALHAATMVTAGVVMICRLSPLFEWAPG  
... ALAFVTFIGATTALFAATVGLVQNDIKRIIAYSTCSQLGYMFFAAGLGAYPVAMFHLFTHAFFKALLFLGAGSV



```
522... IHAMHHEQDIRKMGGLWRYIPLTFVMMVVGTLAITG--LPL-----  
... LSGFYSKDAIIEVAFVVGKGWTAQYAFFVSLLVAAAMTSFYSWRLIFKVFFGPRVWKKDDPDYPT--  
... PVEEAHDDHAHGDDHGHGHELHP-----  
... HESPKTMLIPIGVLTVGAILAGAI FAPGFIGDGYEEFW-----  
... RGSIFFGPNNHVMHDFHYVPLWVKFAPFMMMVTGFFIAWTLYERR-----  
-----  
... RDLPAKLARSQEALYTFFLNRWVFDQAYDFLVKPAQALGRFLWKK-GDGATIDG-  
... AIDGASMKIAPAIAGLLRRAQSGYVFHYAFAMILGVVVLVGLAVV-----  
523 >WP_138015039_NuoL_Pelagicola_litoralis  
524 ME-----KIILFAPLVGSLIGGFGW----RFIGEKGAQYVTTGLLFLACALSWIVFLGHD---GQTQYIHIL  
... ---  
... DWIQSGTLDTAWAIRLDRLTAIMLIVVTSVSAVVHLYSFGYMDHDPQWKEGESYKPRFFAYLSFFTFAMLMMLVT  
... SDNLLQMFVGGWEGVGVASYLLIGFYRKP SANAAAIKAFVNRVGDVGFGLGIFGLFMLTDSVKF--  
... DDIFAAAPALADTQ---  
... LHFLWADWNAANLIAFLFFIGAMGKSAQLFLHTWLPDAMEGPTPVSAL IHAATMVTAGVFLICRMSPLMEYAPE  
... ATAFITFLGATTAFAATIGLVQNDIKRVIAYSTMSQLGYMFVAAGVGVYSVAMFHLFTHAFFKAMFLGAGSV  
... IHAMHHEQDMRNYGALRKKIPYTFMAMMIGTLAITGVGIPLTH-----IGFAGFLSKDAVIESAWA--  
... GTAGGYAFWMLVIAALFTSFYSWRLMFMFTFYGKAR--GDKHTHDHA-----  
... -----HESPMVMLVPLGLLALGAVFSGMIWYGSFFGDHDKVNK--  
... FFG-GHGAFMAPDNHVMDEAHHAPTWVKVSPFVAMIIGFVAMWFIWN-----  
-----  
... PSMPKKLADAQRPLYLFLLNKWFDELYDVIFVRPAKAI GRFLWKR-GDGNVIDG-  
... ALNGVAMGIVPFFTKLAGRAQSGYIFTYAFAMVIGIVVLITWMTLSGGAH-----  
525 >EAU50537_NuoL_Rhodobacterales_HTCC2255  
526 ME-----IVLLFAPLVGSIICGFGH----RILGEKISMVSTGALFISAILSWVVFINFHGD-GHTI-SLFR  
... ---  
... FIESGSLSDWAIRIDRLTAIMLVVINTVSALVHLYSWG YMDKDPQWKQGESYKPRFFAYLSFFTFAMLMMLVTS  
... DNLLQMFFGWEGVGVASYLLIGFYRKP SAGAAAMKAFIVNRVGDVGFALGIFGLFYLSGSINF--  
... SEVLDHNAKELSKTS--  
... FQFLSWQLNALEVITMLLFIGAMGKSAQLMLHTWLPDAMEGPTPVSAL IHAATMVTAGVFMVCRLSPLMEYATF  
... TPNFIVLIGATTAFFAATVGLVQNDIKRVIAYSTCSQLGYMFVAAGVGAYGAAMFHLFTHAFFKAMFLGAGSV  
... IHAMHHEQDMRNYGALRKKIPYTFMAMMIGTLAITGVGIPLTH-----  
... YGFAGFLSKDAIIESAYGAGTGVGQYAFVMLVVAAMTSFYSWRLIFLTFYGKAR--GNSHTHDHA-----  
... -----  
... HESPLVMILPLAVLALGAVFSGMIWYEDFFGD-HWEE---FF-  
... GSSLYANHDTNHVVHDAH YVANWVKASPFFAMLF GFIMALWFIWA-----  
-----  
... PENPAKLAKQQNAVYLFFLNKWFDELYEII FVRPSKWLG NFLWKR-GDGSLIDG-  
... GINGIALGIIPLLTRKYQGMQSGYLFHYAFTMIGVAVIVTWFALTGSN-----  
527 >WP_011748520_NuoL_Paracoccus_denitrificans  
528 ME-----KFVLFAPLIASLIAGLGW----RAIGEKAQYLTTGVFLSCLISWYLFLSFD---GVP--  
... RHIPVL-  
... DWVVTGDFHAEWAIRLDRLTAIMLIVVTTVSALVHMYS LGYMAHDDNWITHDEHYKARFFAYLSFFTFAMLMMLVT  
... ADNLLQMFFGWEGVGVASYLLIGFYRKP SANAAAMKAFIVNRVGDVGFLLGIFGIYWLTGQSVQF--  
... DEIFRQVPQLAQTE---  
... MHFLWRD WNAANLLGFLLVGAMGKSAQLLLHTWLPDAMEGPTPVSAL IHAATMVTAGVFLVCRMSPLYEFAPD  
... AKNFIVIIGATTAFFAATVGLVQNDIKRVIAYSTCSQLGYMFVAAGVGVYSAAMFHLLTHAFFKAMFLGAGSV  
... IHAMHHEQDMRNYGGLRKKIPLTFWAMMIGTFAITGVGIPLTH-----LGFAGFLSKDAIIESAYA-----
```

```
528... GSGYAFWLLVIAACFTSFYSWRLIFLTFY GKPR--GDHHAHDHA-----  
-----HESPPVMTIPLGVLAIGAVFAGMVWYGPFFGD-  
... HHKVTEYFHIVGGAIYMHPDNHIMDEAHHAPAWVKVSPFVAMVLGLITAWTFYIAN-----  
-----  
... PSLPRRLAAQPALYRFLLNKWFDEIYEFIFVRPAKWLG RVLWKG-GDGAVIDG-  
... TINGVAMGLIPRLTRAAVRVQSGYLFHYAFAMVLGIVGLLIWVMM-RGAH-----  
529 >WP_038147201_NuoL_Thioclava_atlantica  
530 ME-----TIILF SPLVGAIIGFGW----RVIGEKGAMVLT TGLLFLAAALSWIVFLTL----GDTTQ-  
... HIHIL-  
... NWISSGDLVDNWSIRMDRLTAIMLIVVTTVSALVHLYSWGYMAHDENWTENENYKARFFAYLSFFFTTMLMLVT  
... SDNLLQMFFGWEGVGVASYLLIGFYKKPSANAAAMKAFIVNRVGD FGLLGMFGLFYMTGSLKM--  
... DDVFAAAPALADTQ---  
... LHFLWTDWNAIELIGVLLFVGAMGKSAQLFLHTWLPDAMEGPTPVSAL IHAATMVTAGVFLVCRMSPVY EYAPH  
... AKEFILIIIGATTAFFAATVGLVQNDIKRVIAYSTCSQLGYMFAAAGVGVYSASMFHLLTHAFFKALLFLSAGSV  
... ITAMHHEQDMRNYGGLRKKIPLTFWAMIMGTLAITGVGIPFTH----LGFAGFLSKDAIIESVWA--  
... GDASGYGFWMLVIAAVFTSFYSWRLVFMFTFFGKPR--GDHHAHEHA-----  
-----HESPWVMTVPLVVLVLSLGAIFAGMIWYNAFFGDHAKLVK--  
... FFNLPAAI FMGAENDVIDAAHHAPAWVKMSPFFAMLAGLIVAWLFYIRD-----  
-----  
... VSLPRRLAEAPSLYRFLLNKWFDELYDRIFVRPALWLG YQFWKK-GDGQ-IDR-  
... AIDGMAVGIVPSFTRFLNRMQSGYLFHYAFAMVIGIVGLMFWVVLN GGAN-----  
531 >WP_078546626_NuoL_Thioclava_sp._DLFJ4-1  
532 ME-----TIILFAPLVGAILGGFGW----RVIGEKGAMVLT TGLLFLAALLSWIVFLTL----GQTQHIHVL  
... ---  
... NWITSGELDVSWAIRMDRLTAIMLIVVTTVSSLVHLYSWGYMAHDENFGKGENYKARFFAYLSFFFTTMLMLVT  
... SDNLLQMFFGWEGVGVASYLLIGFYKKPSANAAAMKAFIVNRVGD FGLLGMFGLFYMTGSLQL--  
... DDVFSAAPALSETN---  
... LDFLWGSWNAVELCAFLLFVGAMGKSAQLFLHTWLPDAMEGPTPVSAL IHAATMVTAGVFLVCRMSPVY EYAPH  
... AQT FIVVIGASTAFFAATVGLVQNDIKRVIAYSTCSQLGYMFAAAGVGVYSVAMFHLLTHAFFKALLFLSAGSV  
... ITAMHHEQDMRNYGGLRKKVPLTFWAMIFGTLAITGVGIPFTP----IGFAGFLSKDAIIESVWG--  
... GSGAGYAFWLLVIAAAFTSFYSWRLIFMFTFFGKPR--GDHHAHDHA-----  
-----KESPWVMTVPLVVLVLSFGAIFAGMIWYNVFFGDHAKLVK--  
... FFGLPAAIYMGQENEVIDKAHHAPAWVKVSPFVAMLAGLLVAVLFYIKD-----  
-----  
... TSLPKRF AEAQPGLYRFLLNKWFDELYERIFVRPALWFG YQFWKK-GDEGSIDR-  
... VIDGMAVGIVPTFTRFLNRMQSGYLFHYAFAMVIGIVGLMLWVVLN GGAN-----  
533 >WP_095595910_NuoL_Actibacterium_pelagium  
534 MA-----SIILFAPLVGAIICGFGW----RIIGEKAA MWVATGLLFFACLLSWIVFLGFD---GQMQQIHIL  
... ---  
... DFIQSGSLDTAWAIRLDRLTAIMLIVVTSVSALVHLYSFGYMDHDPQWGEGETYKPRFFAYLSFFFTFAMLSLVT  
... ADNLVQMFFGWEGVGVASYLLIGFYWKKPTASAAAIKAFVNRVGD FGFALGIFALFMLTDSIAF--  
... DDVFAAGPALADTT---  
... LHFLWRDWAANLIGFLLFVGAMGKSAQFILHTWLPDAMEGPTPVSAL IHAATMVTAGVFLVCRMSP IY EYAPQ  
... ATSFIVFLGALTAFFAATVGLVQNDIKRVIAYSTCSQLGYMFAAAGVGVYSVAMFHLFTHAFFKAMFLGAGSV  
... IHAMHHEQDMRNYGNLRKKIPYTFWAMMIGTLAITGVGIPLTH----FGFAGFLSKDAVIESAYA---  
... GGTGF AFWALVVAACFTSFYSWRLMFMTFFGEER--GDKHTHEHA-----  
-----HESPKVMLIPLGALALGAVFSGMVWYGSFFGDNVNK----  
... FFGIPAAYAMGPDNHVLHDAHYPKWKVISPFIAMLIGLVAYLFYIVN-----
```

```
534... -----  
... PALPKKLAEQQRPLYLFLLNKQWYVDEIYDFLFVRPARALGNFLWKK-GDGTVIDG-  
... FLNGVAMGIIPFFTRLAGRAQSGYLFHYAFAMVIGIAVLVTWMTISGGAE-----  
535 >WP_105513845_NuoL_Defluviimonas_denitrificans  
536 ME-----TIIVLAPLVAIIAGFGW----RIIGETAAMALTTGVLFLACLMSWIVFLGFD---GTTQHIHVL  
...  
... DWIQSGSLDTAWSIRVDRLTTIMLIVVTTVSSLVHLYSWGMAHDENWGHHEHYKARFFAYLSFFTFAMLALVT  
... ADNLAQMFFGWEGVGVASYLLIGFYKKPSANAAAIAKAFVVRVGDGFGFALGIFGLFYLTDSILM---  
... DDVFAAAPTLAETR---  
... LGFLWTDWNAANLLAFLFFIGAMGKSAQLFLHTWLPDAMEGPTPVSALHAATMVTAGVFLVCRMSPLFEYAPE  
... AKTFVIYIGAATAFFAATVGLVQNDIKRVIAYSTCSQLGYMFVAAGAGIYSAAMFHLLTHAFFKAMLFLGAGSV  
... IHAMHHEQDMRNYGNLRKKIPLTFWAMMIGTLAITGVGIPLTS-----IGFAGFLSKDAIIESAW---  
... GTGNGFAFWALVVAALFTSFYSWRLMFLTFYGKER--GDHHAHEHA-----  
... -----HESPAVMTVPLGVLALGAI FAGMLWYKPFPGDHERMLS---  
... FFAMPVEAASEATNTVFDNAHHAPAWVKVSPFIAMLIGFFTAWVFYIRD-----  
... -----  
... PSIPGRLLAAQPILYRFLLNKQWYFDEIYEAVFIRPARWLGFLWKK-GDGDVIDG-  
... TINGVAIGFVPLTRIAARLQSGYIFTYAFAMVIGIAVLLLWMTLSGGAH-----  
537 >HDZ53908_NuoL_Sulfitobacter_litoralis  
538 ME-----TIILFAPLVGALICGFGW----KLIGEKAGQYVATGLLFLAALLSWIVFLSFD---GETQHIQIL  
...  
... RWIESGSLSTDWAIRLDRLTAIMLIVITTVSSLVHLYSFGYMAHDENFSDAEPYRARFFAYLSFFTFAMLMLVT  
... SDNLVQMFFGWEGVGVASYLLIGFYKKPSANAAAIAKAFVVRVGDGFGFLGIMALFYLTDSIKF---  
... DDIFAATPDLAETT---  
... LGFLWSEWNAANLIAILLFIGAMGKSAQLFLHTWLPDAMEGPTPVSALHAATMVTAGVFLICRMSPLMEVAPE  
... AMMFVTFLGATTAFVAATIGLVQNDIKRVIAYSTMSQLGYMFVAAGVGMYSAMFHLFTHAFFKAMLFLGAGSV  
... IHAMHHEQDMRNYGALRKKIPYTFWAMMIGTLAITGVGIPLTH-----FGFAGFLSKDAIIESAW---  
... GGGSMYGFWMLVIAAAMTSFYSWRLMFLTFFGKAR--GDKHTHDHA-----  
... -----HESPMVMLVPLGVLSLGAIFAGMVWYNSFFGHAEDVGE--  
... FYGIPMALYIAPDNHVLDDAHAAPAWVKVSPFIAMVFLVMALWFYIWN-----  
... -----  
... PSLPARLAANQRPLYLFFLNKQWYFDELYNVIFVKPAMAIGRFFWKR-GDGNVIDG-  
... SLNGVAMGIIPFLTRLAGRAQSGYIFTYAFAMVIGIAVFVTWMTMSGGAH-----  
539 >WP_118942038_NuoL_Profundibacter_amoris  
540 ML-----QTILFAPLIGALIAGFGW----RIIGEKGAQMLTTGLLFLSALLSWVVFLTFD---GETQHIQIL  
...  
... RFIESGTLSTDWGIRLDRLTAIMLIVVTTVSSLVHLYSFGYMEDDPQWGEQNYKARFFAYLSFFTFAMLALVT  
... ADNLVQMFFGWEGVGVASYLLIGFYKKPSANAAAIAKAFVVRVGDGFGFALGIFGLFYLTDSIKM---  
... DDVFAAAPQLAETN---  
... LQFLWTEWNAANLLAVLLFIGAMGKSAQLFLHTWLPDAMEGPTPVSALHAATMVTAGVFLVCRMSPLMEYAPQ  
... ATTFIVVIGAATAFVAATIGLVQNDIKRVIAYSTMSQLGYMFVAAGVGAYGVAMFHLLTHAFFKAMLFLGAGSV  
... ITAMHHEQDMRNYGNLRKKIPMTFYAMLIGTLAITGVGIPLTS-----IGFAGFLSKDAIIESAF-  
... GGTGASYAFWALVIAAAFTSFYSWRLMFMFTFWGKAR--GDAHTHDHA-----  
... -----HESPLTMLVPLGVLGLGAVFSGMVWYNSFFGDHEKMLT-  
... -FFGMEEAIFMGPENEVIEKAHESPAWVKVSPFIAMVLFVLAWFYIVN-----  
... -----  
... TAAPRRLAEIQPMLYRFLLNKQWYFDEIYDALIVRPAFAIGRFLWKK-GDMGVIDG-  
... SINGVAMGIIPFFTRLAGRAQSGYVFTYALAMVIGIVVLITWMAISGGAE-----
```

```
541 >MBT6020484_NuoL_Planktomarina_temperata
542 ME-----TILLFAPLVGALIAGFGH----GVIGDKAAQVLTALLFLSALLSWVLFLSFD---GQTESIHIL
...
... RWIESGTLSTDWAIRMDRLTTIMLIVITTVSALVHLYSMGYMAHDDHFRDGESYRPRFFAYLSFFTFAMLMMLVT
... SDNLLQLFFGWEGVGVASYLLIGFYIRKQSAGAAAIKAFVVRVGDGDFGFLGIFGLYLVAADSIKF--
... EDIFLIGPQLATME----
... LHFLWRDWAANLIAFLLFVGAMGKSAQLILHTWLPDAMEGPTPVSALIIHAATMVTAGVFLVCRMSPIMEFAPD
... TMNFIVFLGASTAFFAATVGLVQNDIKRVIAYSTCSQLGYMFVAAGLVYVSAMFHLTHAFFKAMFLGAGSV
... IHGMHHEQDMRNYGGLRKKLPYTFWAMMIGTLAITGVGIPLTH-----YGFAGFLSKDAVIESAYA--
... GTMGGYAFWMLVIAAMFTSFYSWRLMFLTFFGAAR--GDKHTHEHA-----
... -----HESPKVMLVPLAVLAVGAI FSGMV FYK PFFGDH HKVEV--
... FFGIVEAFYMAPSNTVLDDAHVHVLVKLSPFIAMVLGFAGAWAFYMTK-----
... -----
... LDLPRRVAESNPVLYRFLLNKWFDEIYDVI FLRPAQWLGR TLWKV-GDGKIIDG-
... GINGLAMGIIPFFTKWAGRMQSGYIFTYAFGMVIGIAALVTWVTIAGGK-----
543 >WP_133489491_NuoL_Aliiroseovarius_marinus
544 MV-----QFILFAPLFGALVAGFGH----RFIGDKGAQILTALLFWSAFLSWITFFGLG---SETQIIHLM
... ---DWVQSGSLSDWSIRLDRLTAIMLVVVTSSLVHLYSMGYMAHDPQF-
... EGESYRPRFFAYLSFFTFMLMLVTSDNLLQMFFGWEGVGVASYLLIGFYKPSANAAAIKAFVVRVGDGDFG
... ALGIFGLFYMTDSIRF--DDVFAAAPALAE TN---
... IHFLWTDWAANLLAFLLFVGAMGKSAQLILHTWLPDAMEGPTPVSALIIHAATMVTAGVFLVCRMSPIMEYAPE
... ATNFIVFLGATTAFFAATVGLVQNDIKRVIAYSTCSQLGYMFVAAGLVYVSAMFHLTHAFFKAMFLGAGSV
... IHGMHHEQDMRNYGDLRKKLPITFWAMMIGTLAITGVGIPLTT-----IGFAGFLSKDAVIESAFA--
... GTNGGYAFWMLVIAALFTSFYSWRLMFMFTFYGKAR--GDKHTHEHA-----
... -----HESPLVMTIPLGVLAIGAI FAGMIWYGPFFGKEDKVNQ--
... FFGIEGEAEMHPDNHVLHDAHYPKWKV LSPFVAMIIGFVTAFWFYIKN-----
... -----
... PSLPKRLAETFP HVYNFLLNKWFDEIYDILFVKP AFMVGRFLWKR-GDGNVIDG-
... FLNGVAMGIVPWFTKQAGRAQTGYLFSYAFAMVLGIVALVTIMIFSGGAH-----
545 >WP_125403843_NuoL_Rhodovulum_robiginosum
546 ME-----KIILFAPLLGALLCGFTW----RLIGEKAAMWTATVLV FVSMVLSWV VFFGFD---GEMRQVEVF
... ---
... RFIESGTFADWAIRIDRLTAIMLIVVTTVS AFVHLYSFGYMDHDPQWQEEEHYKARFFAYLSIFTFAMLALVT
... ADNLIQMFFGWEGVGLASYLLIGFYFKKPSANAAAMKAFIVNRVGDGDFGALGIFALYFLVDSVNF--
... TDVFAAAPEIAETE----
... LSFLNGS WNAANLIGILLFIGAMGKSAQLLHTWLPDAMEGPTPVSALIIHAATMVTAGVFLICRMSPLIEFAPQ
... AQTMI VVVGAATAFFAATVGLVQNDIKRVIAYSTCSQLGYMFVAAGLVYVSAMFHLTHAFFKALLFLGAGSV
... IHAMHHEQDMRNYGGLKDKIPYTFYAMLIGTLAITGVGIPLTS-----IGFAGFLSKDAIIESAFG---
... SGD TWAFWTLVIAAAMTSFYSWRLMFMFTFWGTPR--GDKHTHEHA-----
... -----HESPRSM LIPLGVLAFGAVFAGMAWYGSFFGDHDRVNR--
... FYGIPSTAEAGADNHVMDEAHHAPQWVKAAPFLAMLLGLGLAYQFYLV S-----
... -----
... PSVPGQLARQFRPVYLFLLNKWFDELYDAIFVNPARNIGRALWKG-GDGSLIDG-
... AINGLSMGFVPFLTRLSGRMQSGYLFHYAFAMVLGIALLV TWM SLGGGAN-----
547 >WP_187428657_NuoL_Roseobacter_litoralis
548 ME-----TIILFAPLLGALLCGFGW----KVFGEAAAMWIATALLFVSAILSWV VFLSFD---GTTEIQIQL
... ---
... RFIESGTLSTDWAIRMDRLTAIMLVVITTVS SLVHLYSFGYMDKDPQWKEGETYKPRFFAYLSFFTFAMLMMLVT
```

```
548... ADNLVQMFFGWEGVGVASYLLIGFYRKPSANAAAIAKAFVNRVGDGFGFALGIFALFFLTDSINF--  
... DDVFAAAPDLAETQ---  
... LTFLWGEWNAANLIAMLLFIGAMGKSAQLLHTWLPDAMEGPTPVSALHAATMVTAGVFLVCRMSPIMEFAPE  
... AMAFVTVIGATTAFFAATVGLVQTDIKRVIAYSTCSQLGYMFVAAGVGMYSAMFHLFTHAFFKAMFLGAGSV  
... IHAMHHEQDMMNYGGLRKKIPYTFAMMIGTLAITGLGIPVWGDIP--IGFAGFQSKDAIVESAYA---  
... AGTMYGFWALVIAALFTSFYSWRLMFLTFY GKPR--GDKHTHDHA-----  
... -----HESPMTMILPLGVLALGAI FAGMVWYGSFFGHTDKVAK---  
... FYGIPYA-EAGADNTLLDDAHKVPYVVKTS PFAAMLIGFLTAYWFIKN-----  
... -----  
... PSLPGRLAQNRPLYLFLKNKWFDELYDVIFVGP AKWIGRMLWKR-GDGDVIDG-  
... GLNGVAMGIIPFFTRLAGRAQSGYIFTYAFAMVIGIAVLVTWMTMSGGAN-----  
549 >WP_102223097_NuoL_Acidimangrovimonas_sediminis  
550 MV-----EFILFAPLVGAI VAGFGW----RFITETGAEWLTTALLFAAAIAAWFVFFSFD---GNTQVVTIF  
... ---  
... RWIDSGSLQANWGVRLDRLTTIMLIVVTTVSALVHLYSIGYMAHDEDESKGENYRARFFAYISLFTFTMLALVT  
... ANNLLQLFFGWEGVGLVSYLLVGFYK KPSANAAAIAKAFIVNRVGDGFGFLLGIFAI FVATDSINF--  
... DII FPKSAELAQM H---  
... IGFLWTTWNAADVIGVLLFIGAAGKSAQLFLHTWLPDAMEGPTPVSALHAATMVTAGVFLVCRMSPLYEYAPG  
... AAALVLVIGATTAFFAATVGLVQTDIKRVIAYSTCSQLGYMFAAAGAGVYSAAMFHLMTHAFFKALLFLCAGSV  
... ITAMHHEQDMRSYGGLRKKIPFTFMMVIGTLAITGTGIPFTGDGP--IGFAGYDSKDAIIEGVWG--  
... ANGAGYAFWMLVIAAAFTSFYSWRLIFMTFFGAPK--GDKHAHEHA-----  
... -----HESPMVMLIPLGVLALGATFAGMIWYNSFFGNEKSMES--  
... FFHLP--THAERDNQAIEHAHHAPAWVKISPFIAMALGFL LAWV MYIRS-----  
... -----  
... PSM PGKLAESQRPLYLFLLNKWFDELYDAIFVRPMLAVGRFFWRW-GDGVVIDG-  
... SINALATRIIPAMTRAAGRLQSGFVYTYAFTMVIGITLLVTWMTLTGGAQ-----  
551 >WP_050686206_NuoL_Phaeobacter_italicus  
552 ME-----TILLFTPLV GALVCGFGH----KILGEKVATVFATALLFLTAALSWIVFLTFDPS-  
... AHENGYTVEILRWIQSGSLDTSWQFRVDRLTAIMLIVITSVSSLVHLYSFGYMDHDPQWKDGESYKPRFFAYL  
... SFFTFAMLMLVTADNLVQMFFGWEGVGVASYLLIGFYRKPSAGAAAMKAFIVNRVGDGFGFALGIFALFFLTGS  
... INF--DDIFAATPMLAETQ---  
... LGFLWTEWNAANLIAFLLFVGAMGKSAQLILHTWLPDAMEGPTPVSALHAATMVTAGVFLVCRMSPMEVAPE  
... ATAFITVLGATTAFFAATVGLVQTDIKRVIAYSTCSQLGYMFVAAGVGMYSAMFHLFTHAFFKAMFLGAGSV  
... IHAMHHEQDMMNYGGLRKKIPYTFWAMMIGTLAITGVGIPLTH-----IGFAGFLSKDAIIESAYA---  
... GGS MYGFWMLVIAAAMTSFYSWRLIFLTFY GKPR--GDKHTHDHA-----  
... -----HESPMVMLVPLGVLALGAVFSGMVWYNSFFGHTDTVGK---  
... FYGIPYAEAAEADNTLLDDAHAVNKWVKVSPFIAMVLGLSLAIWFYIVN-----  
... -----  
... PSLPGRLAQTHQPLYQFLKNKWFDELYNYVFKPALALGRFFWKR-GDGSTIDG-  
... ALNGLAMGIIPFFTRLAGRAQSGYIFTYAFWMLGIAALVTWMSIGGGAH-----  
553 >WP_16085423_NuoL_Oceanomicrobium_pacificus  
554 MT-----DIILFAPLVGALICGFGH----RFIGEKAAMWTATGLLFLACALSWIVFLFGD---  
... YHHHAVSHAV-  
... LRWIESGTL SSEWGIRLDTLTAIMLIVVTSVSALVHLYSFGYMDHDPQWKEGESYKPRFFAYLSFFTFAMLMLV  
... TSDNLLQMFFGWEGVGVASYLLIGFYRKPSANAAAMKAFIVNRVGDGFGFLLGIFATYMLVDSIRF--  
... DDIFAAAPALAEES---  
... FHFLSWEVPAVETIAVLLFIGAMGKSAQLFLHTWLPDAMEGPTPVSALHAATMVTAGVFLVCRMSPVMEYAPG  
... ALMFVTVIGASTAFFAATIGLVQNDIKRVIAYSTCSQLGYMFAAAGVGVYQAAMFHLFTHAFFKAMFLGAGSV
```

```
554... IHAMHHEQDMRNYGGLRSKIPYTFWAMMLGTLAITGVGIPLTH-----  
... IGFAGFLSKDAIIESAFAAHSVGTYAFTLLVLAAAMTSFYSWRLMFLTFY GKPR--GDAHTHEHA-----  
... -----  
... HESPMVMVPLGILALGAIFAGMIWYEDFFGHHAKE-----FFGA--  
... SVFMHPDNHVMHDAHEVSKLVKVSPFLAMLVGLALAYWFYIVN-----  
... -----PSIPGRIAKTNHGLYQFLLNKWYFDELYDAVFRPAKALGRFLWKR  
... -GDGSVIDG-GINGLAMGVVPPFFTRLVGRAQSGYIFHYAFAMILGVVVIVTWFAVSGGAQ-----  
555 >WP_012177999_NuoL_Dinoroseobacter_shibae  
556 ME-----SIILFAPLVGALICGFGW----KFIGEKAALWVSTGFVFLAAILSWFVFLTFD---GTTEQIQVL  
... ---  
... RWIESGSLAADWAIRMDRLTAIMLIVVNTVSALVHLYSFGYMDHDPQWREGETYKPRFFAYLSFFTFAMLMMLVT  
... SDNLVQMFFGWEGVGVASYLLIGFYWRKPSAGAAAMKAFIVNRVGDGFLGIFALFYLTDSVNL--  
... TDIFAAPELAETQ---  
... ISFLWTDWNAANLIAFLLFIGAMGKSAQLFLHTWLPDAMEGPTPVSALHAATMVTAGVFLVCRMSPVMEFAPQ  
... AMTFVTFVGATTAFFAATVGLVQNDIKRVIAYSTCSQLGYMFVAAGVGAYPVAMFHLFTHAFFKAMFLGAGSV  
... IHAMHHEQDMRNYGGLRKKIPYTFWAMMIGTLAITGVGIPLTGW-----  
... IGFAGFASKDAVIESAFAGTNAAHMYAFWMLVIAALMTSFYSWRLMFMFTFYGTGR--GDKHTHEHA-----  
... -----  
... HESPKVMLIPLGVLALGSVFAGAIWYGSFFGHTDEVAK--  
... FYGIPYAEYMAPENTVMADAHDVVKVSPFVAMLIGLGLSYLFYIRK-----  
... -----  
... PSLPGTFAETLWPVYNFIYNKWFDEIYDAVFKPSKAIGRFLWTK-GDGATIDG-  
... GINGLAMGIIPFFTRLAGRAQSGYLFHYAFAMVLGITILVTWMMIGGGAE-----  
557 >WP_150968212_NuoL_Aureimonas_leprariae  
558 MY-----ALIVLLPLAGFLIVGFLG----NSIGAKASEYVTSGLMIVAAVLSWIAFLFLAP--EAPQSHAIL  
... ---QWMQAGSLDVSWSLRIDRLTLVMLVVVNTVSALVHVYSIGYMHDPH-----  
... RPRFFCYLSLFTFAMLMMLVTSNDLVQMFFGWEGVGLASYLLIGFWYKKPSASAAAMKAFIVNRVGDGFGFALGIF  
... GIFVLFGSVNF--DTIFAGAADLTKL---  
... GEGGEEAAAAVTAICLLLFMGAMGKSAQLGLHTWLPDAMEGPTPVSALHAATMVTAGVFLARMSPIFELSHP  
... ALTFVTFIGATTAFFAATIGLVQNDIKRVIAYSTCSQLGYMFAALGVGAYGPAIFHLFTHAFFKALLFLGAGSV  
... IHAVSDQQDMRNMGGLRKHIPKTYWMMVIGTLALTG--FPF-----  
... TAGYYSKDAIIESTWAGDNAFAVYACGLTIIAAALTSFYSWRLIFMTFHGKPR--ASHEVMHHI-----  
... -----  
... HESPPVMLVPLYVLGAGALLAGILFEHFFIGE-GYGE---FW--  
... RAALVTGAENHVLHEMHEAPFLIKIAPFLAMAGGFIVAWIFYIRS-----  
... -----  
... QSLPARTAATNPGLYRFLLNKWFDELYDVVVFVRSAKALGRFFWKTGGDQKVIDGLGPDGIS-  
... ARVLDVTDRVVRIQSGYLYHYAFAMLIGIAALVTLMMV--GGR-----  
559 >WP_160587554_Pyruvatibacter_mobilis  
560 MY-----SAIVFLPLLGLIAGLFG----RVIGHRGSEIVTTSLLMLAALLSWIAFFDVAF--GGYT-  
... GKVHIL-RWIDSGALEVDWMIRVDTLTAVMLVVVNTVSSLVHLYSIGYMSHDPH-----  
... RSRFFAYLSLFTFAMLMMLVTADNFVQMFFGWEGVGLASYLLIGFWYKKPSANAAAMKAFVNRVGDGFGFLGVA  
... GTFLVFGSLDF--DTVFAAVPEVAGQT---  
... FAFAGMQVDIMTTLCLLLLFMGAMGKSAQFLHTWLPDAMEGPTPVSALHAATMVTAGVVLVARTSPMFEFAPD  
... ALWFVTLIGATTAFFAATVGLVQNDIKRVIAYSTCSQLGYMFVALGLGGYQMAVHFLFTHAFFKALLFLGAGSV  
... IHAMSDEQDMRKMGGIFKMIPTWIMMIIGTLGLT--GVPY-----  
... LAGYYSKDAIIEAAYMANSGLAGYAFAMTVVAALMTSFYSWRLIFMTFHGESR--ASNEVLSHV-----  
... -----
```

```
560... HESPWVMLIPLIVLSAGTVLAGFPMREFFVGH-DQAT---FW--
... NGSFLTLPNNLIEEFHHAPALVVWSPFIMMVI GLATAWLFYIVR-----
...
... PGIPKALAREQQPLYQFLLNKWYFDELYNVI FVKPAMWLGRTLWKGGGDGFIIDGFGPNGIA-
... ARVMDVTRNVVKLQGTGYVYHYAFAM LIGVAAFVTTYSL--GAH-----
561 >WP_213162180_NuoL_Kaustia_mangrovi
562 MY-----SLIVFLPLIGALVAGLAG----RWIGAQASRVLTSGLVVVS AVLSWVAFYDVGL--
... GHETYKVQVL--SWIHSGAFEADWAFRVD TLTAVMLVVVNTVSALVHIYSIGYMSHDPH-----
... QPRFFAYLSLFTFAMLMVLTADN LVQMFFGWEGVGLASYLLIGFWYQRPSANAAA IKAFFVNRVGD FGFSLGIF
... ACFTVFGAVDL--DTIFASAPDVAGQT---
... MVFLGYEVDILTTICLLL FMGAMGKSAQFL LHTWLPDAMEGPTPVSAL IHAATMVTAGVFLVARM SPIYEFAPD
... ALAFVAFIGATTAFFAAT IGLVQNDIKRVIAYSTCSQLGYMFAALGVGAYGVAIFHL FTHAFFKALLFLGSGSV
... IHAMSDEQDMRKMGG LFPHLKKTWAMMLVGT LALTG--FPL-----
... TAGYFSKDAIIEAFAA HSGVGQYAFWLT VAAFLTSFYSWRLMFM TFHGRQR--ASRDVMAHV-----
...
... HESPNVMLVPLYLLAIGALVAGGLFKGLFI GH--EEAE---FW--
... GAALLRGE GNEIVEAMHHVPGWVPFAPT VMMVAGFALAWLFYIAR-----
...
... PEMPKALAEMHRPLYL FLLNKWYFDELYDL VFVRGAKALGRFLWKR-GDGWAIDGFGPDGVS-
... ARVIDITNRIVRLQGT GYLYHYAFAMLVG IAALITWLMF--GSM-----
563 >WP_167095161_NuoL_Parvibaculum_indicum
564 MF-----SAIVFLPLL GFLTAGIFG----RWLGPRGAQIATC VPMVIAAILAAFAFVDVGLQ-GETY-
... RIQVL--TWINSGAFEADW RLRVDTLTAVMLVVVTWVSALVHIYSIGYMSHDPQ-----
... QPRFFAYLSLFTFAMLMVLTADN FVQLFFGWEGVGLASYLLIGFWYKKPSANAAA IKAFFVNRIGD FGLILGIA
... TLFFTIGSVDF--DTVFKAIPELQDKT---
... FLFLGYDVPVVTTACL LLLFMGAMGKSAQFL LHTWLPDAMEGPTPVSAL IHAATMVTAGVFLVARM SPVFEFSPF
... ALTVVTIIGAITAFFAAT VGLVQNDIKRVIAYSTCSQLGYMFAALGVGAYEPAVFHL FTHAFFKALLFLGSGSV
... IHAMSDEQDMRKMGG LFRMIPATWLMMI IGT LALTG--FPF-----
... TAGYFSKDAIIEATF AGENPAHMFAFVMLVVAAL FTSFYSWRLIFLTFHGQSR--ASNETLSHV-----
...
... HESPMVMMLPLVVLAVGAVFAGMAFSDLFI GK-AHEA---FW-LSS-
... IFKGPDNHVLHDMHHI PAWAIWAPTAMMVI GLAVAVLFYLVK-----
... -----PELPKQLAREQE PLYKFLLNK WYVDEIYDFL FVRPAFWVGRLLWKQ-
... GDGRIIDGLGPDGVS-ARVLDVTRGVVRL QSGYLYHYAFAMLLGVAALATYFMF-GGAH-----
565 >ATY40894_ND5_Picozoan_Picobiliphyte_sp.MS584-11
566 MY-----LTIVFLPLV GSMIAGLGG----RWVGPIGACLVT TTTCLLISFFFSCIVFYEVGLC-GSP--
... CHIHLL-DWFDSAAFVGA WGFQFDTLTATMLIVVTGVSS CVHIFSVDYMSGDPH-----
... RARFMSYLSFFTFM LTLITADNFIQLFFGWEGVGLCSYLLINFWYSRITANRAALKAFIMNRVGD FGFGLGIF
... GCYMFVQSIEF--ETIFACAPLYANQT---
... FEFFNF EVDQLTCIVCLL FVGAVGKSSQIGLHTWLPDAMEGPTPVSAL IHAATMVTAGIYMLLRCSPLLEYAPD
... ALSVIAFFGASTAFFA AT TGLLQNDLKKVIAYSTCSQLGYMCF AVGLSKYSVSFFHLANHAFFKALLFLSAGCV
... IHAMQDEQEMRRMGGL LSSLPFTYSTMTLGSLALMG--TPF-----
... LSGFYSKDAILEYASI HYFIAGSFTFWLGVLA AFCTAFYSFRLGYMTFLTNTN--AYRYCVEHI-----
...
... HDAPGIVLVALCPLAVGSIWSGYFGADMFLGV-GTP----FW--
... GNALFFGWTTTLTLEPHFLPMATKFLPLVFTILGGFLAFLAFNYLAN-----
...
... ITFTLTFHPYIKPIFA FLNKKWYFDKIYDEVFLVQSMLFGRNVTYRLIDGFVFEQLGPMGIQ-
```

566... KTIGVLSGSHKRFHNGFIPNYTSIFFFGILLFLVGFVALPKCLLVLYPGL  
567 >BBU60045\_NAD5\_Cyanidioschyzon\_merolae  
568 MY-----LTTVFAPLLGFLTCMLFG----RFLGKIGACFIVCFCTAISLLFSIIIFYEVCIA-DYT--  
... NNIFFT-LWLSTGLLEIPWGFLFDPLTAVILLTINFVSLLVNVYSVEYIGEDPH-----  
... QVRFIAYLNIFAFFITILVTANNFLQIFLWEGVGLASYLLINFWFTRLLASKSAIKAIINRVGDFFLSLAIF  
... LIFLKYKSLNY--DIVFSITPFMSNYI-----  
... ECLGIKFSYLDMISLFLFLGAIGKSAQIGMHIWLPDAIEGPTPVSALIHAATMVTAGVFLIVRCSPILEYSSNV  
... LIFISVIGASTSLFAGSVAIFQNDLKKVIAYSTCSQLGYMIFACGISNYIPSIFHLVNHAFKALLFLSAGYII  
... HSLFNEQDIRRIGSLLRILPIAYLMIMIGSLSLIG--IPF-----  
... LTGFYSKDLILELSFTSYFIINDFVYYLAIVSACLTAIYSTRLLITFITKPN--FSKISLIKL-----  
... -----  
... HYSSNWITLPLLILAFASICFGFILKDIFVGL-GTN----FW--GSSILINYNHIYFIEAEN-  
... PIIIKWIPFFASIIGFFIIIIMQNNYAI-----  
... -----FSFSFVRY-MHSFFY-FFNKKWYLDKIIIIIA-NSVLNFGYYVSLKIFDKGVIEYFGPFGLI-  
... KIIPYMSKQSRNLQSGQIAHYVFIIILIGLLVLIIVIEFNLYFIINYIK  
569 >AIA61058\_ND5\_Cyanidiaceae\_sp.\_MX-AZ01  
570 MH-----LTVILAPLIGFLTCGLFG----RFIGKKGANFISCFICVSLLSIIIFYEACFS-NYK--  
... NHILLS-SWIDSAFLEVSWGFI FDSL TAVILLIVNFISLLVIIYSIEYIQEDPH-----  
... QIRFISYLTIFVFFITILVTANNFMQLFLGWEGVGLASYLLINFWFTRLQANKSAIKAIINRVGDFFLSLGIL  
... FIFIKFQSLNY--NVVFSIVPFITDNF----  
... LECYGIKFSYLDIITLLLFLGAMGKSAQLGIHIWLPDAIEGPTPVSALIHAATIVTAGVFLVVRCSPIFEFSNF  
... TLVFSVVGALTSFFAGSVAIFQNDLKKVIAYSTCSQLGYMIFVCGISNYTSSIFHVMNHAFKALLFLSAGYI  
... IHSLINEQDIRRIGALMRILPIAYIIMLIGSLSLIG--IPF-----  
... ITGFYSKDLILELIFESYFVIHDFVYWLAIIVSVFLTAMYSIRVILLVFKNSN--TARINLINL-----  
... -----  
... HYSSFFITSPLFILAFASICFGFLLKDIFVGL-GTN----FW--  
... GSSVIIYYSQVNFLEVENLSTVIKWLPIIISIIGVFLILLSINYDLF-----  
... -----RLFPLEK--IHTIFY-FFNKKWYFDKIITTIA-  
... NFILSFGYDISLRIFDKGIIIEYFGPFGLI-  
... KIVPYFSIRSKNLQTGQIAHYIFVILIGFLSLVLFTEFLNIINLIHFEK  
571 >YP\_010007659\_NAD5\_Cyanidium\_caldarium  
572 MY-----LIILFLPFCGSLFSILFG----RWVGGFGSSVITCLCLILAIFLSCIAFYEVGIL-NYP--  
... CYIKLT-SWIDSGIFHVSWGFLFDLSTVMTMIVIVSVISLLVHIYAIEYIRLDPH-----  
... LPRFISYLSVFTFFILILVTANNFIQIFLWEGVGFASYLLINFWFTRLSANKAALKAIVINRIGDVGLSLGIL  
... VIFLKFHSVDY--LTVFNLPNVFFES----  
... FNFFNIKVNFCIIICLLLFIGVIGKSAQIGLHTWLPDAMEGPTPVSALIHAATIVTAGVFLIIRCSPLEFSDT  
... ALFIVAIIGGITAFFSASIGLFQYDLKKIIAYSTCSQLGYIVFSCGLSNYSVGFHFLFNHAFKALLFLSAGSV  
... IHAFLEQDIRFIGGLKNLLPFTYAIMIVGSFSLG--FPF-----  
... ITGFYSKDLILESAYNNFNIGSDFIYWLGLITVLLTAFYSFRLFLVFLNYPN--FSTLIFNKV-----  
... -----  
... NDCSFYIKTSLTFLAIGSIFLGYLTKEMLVGM-GTD----FW--  
... DISLFFKLNHIDFVENEYLYFLIKLIPIFFSFFGILF-CYLFNYFIN-----  
... -----LKF-LEVQLRFYRFLFFLNKKWGWDYIYTYIA-  
... YQFMNFGYYISFKLIDKGILEFFGPQSLM-  
... KLITNMLNKLKFIQTGQITHYVFIIILGALVLFTELVDLVLYFFNIK  
573 >YP\_009968183\_ND5\_Cyanidiococcus\_yangmingshanensis  
574 MY-----LITIFAPLLGFIICGLFG----RFLGKKGACFITYFCSSISLVFSIIIFYEVSVA-AYD--  
... NHILLA-KWVESSIFFVSWGFFNFDLSTALILVMVSFISLLVNIYSIEYIEEDPH-----



574... QVRFISYLNIFVFFMFLVTANNFIQLFLGWEGVGLSSYLLINFWFTRLIANKAAIKAIINRVGDFFLSLGIF  
... FIFFKFKSLDY--NVSFSIAPSIIDNY----  
... LECLGIKFLYLDVVTFLFLFLGAIGKSAQIGIHMWLPDAIEGPTPVSALIIHAATMVTAGVFLIVRCSPIFEFSHF  
... TLVVIISVVGALTSLFAGSVAIFQNDLKRVIAYSTCSQLGYIMFACGISNYMASIFHLLNHAFKALLFLSAGYI  
... IHSLANEQDIRRIGSLIRIPIAYIAIIIGSLSLIG--IPF-----  
... LTGFYSKDLILELTFGSYFIIHDFTYWLAIISASMTAIYSMRLVLLTFIKSTN--VIKINLIHI-----  
... -----  
... HYSSSWMIVPLVILIIIGSIYFGFILKDIIIGL-GTD----FW--  
... GSSILTHYSRANFVEVENLHVIKWL PFFVSILGVVILFIYNYDFK-----  
... -----IFSTIFLKYTHSFFY-FFNKKWYFDKIANIIA-  
... IYLLSFGYNVCLKVFDKGIIEYFGPFGLM-  
... KIVPYLSTESKSLQTGQIAHYIFVILMGLLFLILSTEFINIFYIINYIK  
575 >NP\_062497\_ND5\_Chondrus\_crispus  
576 MY-----LLILFLPLLGLSISGFGG----RWLGCRGTNTFSTLCVVVSSLFSLLAFFEIGLT-NTT--  
... CTIFLV-SWIKSGAFYVSWGFLFDSLTVTMLVVITLVSSLVHIYSIKYMENDPH-----  
... QPRFMSYLEIFTFFMLILVTADNLIQMFLGWEGVGLASYLLINFWYTRLAANQSAIKALIVNRVGDGFLSLGIF  
... LIFWVNSVDY--SVIFSLVPLFDNQF---  
... LTFLGFKLHVLTLSLFLFIGAIGKSAQLGLHTWLPDAMEGPTPVSALIIHAATMVTAGVFLMIRFSPILLEFSPT  
... ILFILITFGSLTAFFAAVTGVFQHDLKRVIAYSTCSQLGYMIFSCGMSYDVSLFHLANHAFFKALLFLSAGSV  
... IHAVSNEQDMRRMGSLKFMPLTYSVMLIGTLALIG--FPF-----  
... LTGFYSKDFILELTSSLQMSYISFACWLGTMVFFTSFYFRLIYLTFLNNTN--LAKSSLNLV-----  
... -----  
... HESSLMIFPLIILSIGSIFAGYLIRDLFVGS-GSD----FW--  
... GAAIFILPKHSTFIEAEELPIVVKWLPFILSLLGIFFASFVQIFLKT-----  
... -----  
... FYFKSNLQNLISFFTFLINKKWDVLYNRLIVLPILNFGYSISFKILDRGFIELSGPYGFT-  
... KFVSFWSQILIKLQTGQITHYLFFMIFTFCFSF---SIILVYSYINLTFN  
577 >QKZ95183\_NAD5\_Pyropia\_pulchra  
578 MY-----LLIVVLPLVGTGLTGLGG----RWIGRKGANLFTTTCVILCCCLSIVAFFEVGLC-GVP--  
... CYLSLS-PWISSGALKISWGFLFDSLTTTMLVVITSISSLVHLYSIQYMEYDPH-----  
... CPRFCPSWKFFTFMIVLVTADNFVQMFLGWEGVGLASYLLINFWYTRLCANQAAIKALVNRVGDGFLSLGIF  
... TIFFLFGSVDY--ELVFASASLYTNYS---  
... IYFLGCSVNFLTIIIGIFLLIGAIGKSAQLGLHTWLPDAMEGPTPVSALIIHAATMVTAGVFLIVRCSALINLSSN  
... VLFLITILGSSTAFFASIVGVFQNDIKRVIAYSTCSQLGYMLFVCGLSYYNVGMFHLVNHAFKALLFLSAGSV  
... IHALSNEQDMRRMGSLANSLPITYAAMLIGSLSLAG--FPF-----  
... LTGFYSKDLIIIEITSSLQITFGIFACWLANISVFFTAFTYFRLLFLTFVKNSN--SYEKNIENI-----  
... -----  
... HESPILILIPLILLSLASIFVGFLTKDLFVGV-GTS----FWGNAINILP-TSCNLLEVEF-  
... MSYLIKWLPFVLSINGAIFAYTLNIGYK-----  
... -----NNIQFAYNHIFRKLAFSLSKKLYWDKLYNFLVVSPLMQFGYNVSFKNIDRGFIELLGPYGIS  
... -RTIKKWSTQILKIQTGQVTHYTFVVSGLCLFFLFAPVWSSLEFFIDIR  
579 >YP\_006665880\_NAD5\_Porphyra\_umbilicalis  
580 MY-----LLIIALPLIGTLFTGLGG----RWLGRKGSNIFSTTCVILCFFLSLLAFFEVGLC-GVP--  
... CYVVIS-PWISSGVLNITWGFLFDSLTTTMLVVITSISSLVHLYSIQYMEYDPH-----  
... CPRFMSFLEIFTFFMLLLVTADNFVQMFLGWEGVGLVSYLLINFWYTRLCANQAAVKALIVNRVGDGFLSLGIL  
... TIFSLFGSVDY--EVVFSLVHTYSNHN---  
... IYLFGAHLNLTTLVGIFLLIGAVGKSAQLGLHTWLPDAMEGPTPVSALIIHAATMVTAGVFLIVRCSPLIDLAPN  
... VLFLITILGSSTAFFASIVGVFQNDIKRVIAYSTCSQLGYMVFVCGLSYYNVGMFHLVNHAFKALLFLSAGSV

```
580... IHALSNEQDMRRMGSLMHNLPITYAAMLIGSLSLAG--FPF-----  
... LTGFYSKDLIIEITSSLYITYGIFACWLANISVFFTSFYTFRLIFLTFIKNNN--SYRTYMDGI-----  
... -----  
... HESPKLILIPLILLAIASIFVGFISKDLFVGV--GNS----FWGNSISTMP-IACNLLEVEF-  
... MTTSIKWLPFVLSTLGAFFAYSVNAGIFK-----  
... -----NNITFAYSNRFRKLAFLSLSKKLYWDKLYNGLIVSFLLNFGYNISFKNIDRGFIELLGPYGIS  
... -KIISNLSFKIAKIQTGQITHYTFVVTGLCLLLLLVPFFTFLENLIDIR  
581 >AIU44693_NAD5_Cyanophora_paradoxa  
582 MY-----LTLIILPLLSALVG-FLV----YFIGNRFAAFICTTLLGFTLALSISKSFYIALL-QNP--  
... CYIQTL-PWFLGENLVIFWGFLFDSVTATMLVVVTSISFLVHFYSIEYMGADPH-----  
... LGRFMSYLSFFTFMILILVTADNFVQMFVWEGVGLCSYLLINFFFNRIQANKAAIKAMIMNRIGDFGLSLAIM  
... VIFYTCKSDY--HTVFACVPFFIDST---  
... FMFFNFENVLITCICILLFIGAVGKSAQIGLHTWLPDAMEGPTPVSALIIHAATMVTAGVFLIIRCSFLFEFSDT  
... ALDILTIIGALTAFFAATTGLLQNDAKRVIAYSTCSQLGYMVFCGFSGYSVSLFHLANHAFFKALLFLTAGSL  
... IHGMQDEQDFRKMGGLSYLLPYSYSMLLIGSLSLAG--FPF-----  
... LTGFYSKDMILELTFSSYLFKGTFAYTLGVVSAFFTAFYFRLIYWAFLAKPN--GYKYSYANA-----  
... -----  
... SESRFFITIPLAILAFASIFIGYILRDMFIGV-GTS----FWNNSIFILP-ENNFIESEF-  
... IPIHNKLTVPVIFSLCGLFTAFFLYHIL-----  
... -----FKKIFILNSPYIKFYTFLNKRWYFDKIYNEFIALPVISSGYKITFKIIDRGILELFGPAGIV  
... -ANLLNIARNTSNLQSGFMYHYLFLILLSITGAIVLIIGLLYNYFTLPIG  
583 >YP_009092497_NAD5_Cyanoptycha_gloeocystis  
584 MH-----LTVIILPLLSFVINTLFG----RSLGNSKIAIISTFNMAVTFIISVILFYETSII-GQV--  
... LNIDVS-QWIRSEYLIVNWGFLFDQLTTTMLIIVNSISFLVHLYSTEYMRNDPH-----  
... LGRFMSYLSFFTFMILILVTANNYLQMFVWEGVGLCSYLLINFFSARIQANKAAIKAMVLNRIGDFGLTIGML  
... MLLFVFKSLDY--SIIFSLAPYYTEEY---  
... IIIMNKSFSVLDLTTFFLLIGAIGKSAQLGLHTWLPDAMEGPTPVSALIIHAATMVTAGVFMIIIRSSPLFEFAPT  
... TLFTISIVGCLTAFFAASTGLLQNDLKRVIAYSTCSQLGYMVFACGVSAYNVAIAHLFNHAFFKALLFLTAGSI  
... IHSLADEQDLRKMGGTLQLLPLAYVMMLIGSLSLMG--FPF-----  
... LTGFYSKDFILEVTLSKYTINSAFCYWLGTLSAFFTAYYSFRLLYYTFLSKPN--GYKSTYNNI-----  
... -----  
... HESNITMVLPLCALGFLSIFVGFVAFKDMMVGI-GTN----FWDSSIFILPSIMNHINDAEN-  
... IQLFLKWLPVIFSI LGAMLALLVYNYL-----  
... -----KNILLSNLIMYKALYSFFNKKWYFDKIYNEIIAQYISMMGYHYTFKTLDRGIIIEIIGPFGIA  
... -DTFIKISKSTSFLQSGYLHHYIYTIFFGAILVLVILTSNYIKLQFWDLR  
585 >YP_009092462_NAD5_Gloeochaete_wittrockiana  
586 MY-----LVIVFLPLVSAIMAGLFG----RFLGNKNSAYLATFCLGFTFFLCLIAFYEVGLC-HSP--  
... CYIVSF-PWIQSELFKVNSFLFDSITVVMLIVVTSVSFLVHMYSIEYMGQDPH-----  
... LSRFMSYLSFFTFMILILVTADNFLQMFVWEGVGLCSYLLINFYFTRVQANKAALKAMIVNRIGDFGLSLGMM  
... ALFFTFKTLDY--NVVFNLAPLVNEN---  
... FCFFSFELNKITVICLLLFIGAVGKSAQLGLHTWLPDAMEGPTPVSALIIHAATMVTAGVFLIIRCSPLFELSAI  
... ALDVLVFGSLTAFFAATTGLLQNDVKRVIAYSTCSQLGYMVFACGASSYSVAMFHLANHAFFKALLFLTAGAI  
... IHALRDEQDMRKMGGLAMLLPFAYSMIVIGSLSLMG--FPF-----  
... LTGFYSKDSILELVYSSYSSPAGFAYVLGTAAAFCTAFYSFRLIYLVFLSVPN--GYKSYFNQV-----  
... -----  
... HETPYLMALPLVLLAFGSIFIGYLT KDLM LGM-GTN----FWGGSIYFLP-ERAGLFEAEF-  
... IPTNIKILPVCLSLLGAFTA CLFYSSF-----  
... -----FKFLVYLSVYVKDFYTFLNKKWYFDKIYNEVVGKFFIWFYGNMSFKLIDRGFVELFGPYGMS
```

586... -KLSFNLAQKQFSLQLTGFYHYIFMLLVGVTFVFGILSFGYYLNFVVDTR  
587 >YP\_004222736\_NAD5\_Glaucocystis\_nostochinearum  
588 MY-----LSIVFLPLLSAFVAGLLG----KFLGNKISSYFTTICLGITFILSIIAFYEVALC-ASP--  
... CYLTTI-SWIKSELFHVNWGFLFDLTLVVMLIVVTSVSVFLVHMYSIEYMSHDPH-----  
... LSRFMCYLSFFTFFMLILVTADNFLQMFVWEGVGLCSYLLINWFTRIQAANKSAIKAMIMNRIGDFGLSLGMM  
... AIFLTFKSLNY--DIIFTSVNLYSHEF----  
... FLFLNFVFNKITLICILLFVAVGKSAQVGLHTWLPDAMEGPTPVSALIIHAATMVTAGVFLIARCSPLFEYSTL  
... ALSILTIIFGATTAFFAATTGLLQNDIKRVIAYSTCSQLGYMVFSCGISSYSAAVFHLANHAFFKALLFLTAGSI  
... IHSFQDEQDMRKMGGGLLILPYSYSMILIGSLSLMG--FPF-----  
... LTGFYSKDIILELAYSTYSIDSTFAYWLGITSAFFTAFFYSFRLIYLVLNKPNI--GYKNAYQNA-----  
-----  
... DDSHFWIALPLSLLAFGSIFIGYLSKDMMLGL-GTN----FWGNSLFLLS-NHTTILDSEY-  
... IDYYLKLIPVIFSLIGSVCSYLLYRFS-----  
-----  
... -KNFLFTLNLRFKTIYIFFNKRWLFDKIYNEFIGLPALSFGYNISFKLLDRGFFEIFGPYGLA  
... -FVLLNFAKNTSRLQTGLLYHYIFIFILGLTFFVGLIKFGEQFFIYAFIF  
589 >YP\_009317212\_NAD5\_Palpitomonas\_bilix  
590 MY-----LLIVALPLISALTSGLFG----RFLGSKGAGFISVCLLIATSFLSFI AFYEVALN-GSP--  
... CYIKLA-TWVDSEMLHADWGFVFDLTVIMLVVTFVSALVHLYSTGYMEGDPH-----  
... VPRFMSYLSLFTFFMMLVTADNFIQMFVWEGVGLCSYLLITFWFTRVQANKAALKAFIVNRVGDVGLSLGVF  
... AIFYLFSSLDLDF--STVFALAPYMGVGSQ----  
... LIFCGFEVDSLTLICILLFVAVGKSAQLGLHTWLPDAMEGPTPVSALIIHAATMVTAGVFMIIARCSPLFEFAPT  
... ALFVVAIVGAMTAFFAATTGMLQNDLKKVIAYSTCSQLGYMVFVCGLSNYSVGVFHLANHAFFKALLFLSAGSV  
... IHAMSDEQDMRRMGGLAQIIPFTYMMVIGSLSLMG--FPF-----  
... LTGFYSKDVILEIAYAKYSFAGTFSHWLGICISAFFTAFFYSFRLLYLTFIQNTN--AYKRVIIEHA-----  
-----  
... HESSFVMLLPLILLSFGSIFVGYLTKDMIIGL-GTS----FWGNSIFTLP-TNITMVDAEF-  
... LPYYIKLIPVILSLSGAVISLLVYHFMSQ-----  
-----  
... -ILFNVQTSFIGRHLIYIFFNKKWFFDKIYNYFFVQHVLRFGYSITFKSLDKGLIEFLGPYGIA  
... -NVVSRVSSLTSALHTGYIYHYAFVMFVGVVFIILRI-----IF  
591 >YP\_316588\_NAD5\_Thalassiosira\_pseudonana  
592 MY-----LLLIFLPLIGSICAGLFG----RILGPFSSFTVVICLMVTFCLSLFAFYEVALN-DCC--  
... VYIKLA-PWINSEMLNVDWGFVFDLTVVMCCVTFVSSIVHLYSTEYMAVDPH-----  
... LPRFMSYLSLFTFFMMLVTADNFIQMFVWEGVGLCSYLLINWFTRIQAANKAAIKAMILNRIGDFGLVIGIL  
... IIFVEYKAVDY--ATVFALTPIFTNKV----  
... FHFLNFDLFDLISLICFFLFIGAVGKSAQLGLHTWLPDAMEGPTPVSALIIHAATMVTAGVFLIARTSPLFEYTSS  
... ILSLVTIVGACTAFAATVGLLQNDLKRVIAYSTCSQLGYMVFACGLSNYSVGVFHLVNHAFKALLFLGAGSI  
... IHAVADEQDMRKMGGGLKLVFPFTYSMMVIGSLALIG--FPF-----  
... LTGFYSKDVILEVAYGKYTLEGHFSYILGTLGAFLTAFFYSTRLLIYLTFLSKPN--GYKSVICAA-----  
-----  
... YDSSYQISASLFFLVIPSVLIGFYAKDMIIGF-GSD----FWGNAIFTSI-ENMNRIDSEF-  
... ITHFYKILPVALSILGVTSSFLLYLFGSK-----  
-----  
... -ILVKKLSTIGKKIYNFFNKKWFFDKVYNEYVSQFFFTISYTVTYKTIDRGIIEIFGPMGLS  
... -SAITKKALYISKLQTYLYHYTFLILTGLTLILGVRQFVWFLGDFIDFK  
593 >YP\_009050520\_NAD5\_Sargassum\_fusiforme  
594 MY-----LNIVFLPLLGSIAGFFG----RFVGVYVYSCFITVFCVGLTFCLSLSFYEVGLA-GSG--  
... TYLSLM-TWLESDFYVEWAFCFDSLTVVMLIVVTFISTLVHIYSTEYMGDPH-----  
... LPRFVSYLSLFTFFMMLVTADNFIQMFVWEGVGLCSYLLINWFTRIQAANKAAIKAMIVNRIGDFGLALGIF  
... AIFICFGALDY--ATVFAFSPQLTSTCT----

```
594... LSFLNIKFKALDLIGVLLFIGAVGKSAQLGLHTWLPDAMEGPTPVSALIIHAATMVTAGVLLARCSPALLEYCSG
... ALLLISVVGMTAFFAATTALVQNDLKRVIAYSTCSQLGYMVFACGLSNYSVAVFHLANHAFFKALLFLSAGSV
... IHAVGDEQDMRKMGLRRLLPFTYAMMVGISLALMG--MPF-----
... LTGFYSKDVILEIAYATYSIPAHFSYWLGSAAAFCTAFYSIRLLIALCFLVEPN--GSRKLLLSA-----
... -----
... SEGKKAIGFVLGLLAIPSIFVGYFSRDLFIGL-GTH----FWGSSLFCLP-SNLSLIDAEF-
... MSTFSKMLPLCLSIVGGALSFTLYRYNY-----
... -----NMYFWKTSLVGRKFYTFLSRKWFFDKIYNGFISQNILDFGYHFTYKSIDRGLIESLGPFGLS
... -NVLTSQVQARVWHSYLYHYLVIFVWGNLLF----GLWFLFGFPSLRI
595 >YP_009254724_NAD5_Ectocarpus_siliculosus
596 MY-----LNIVFLPLLGLSLVAGFFG----RFLGGRGSLITISCVGLSFFLSGLAFYEVLG-GSS--
... TYLYLM-PWLESDFHVDWAFCFDSLTVVMLIVVTFISTLVHLYSTEYMGDPH-----
... LPRFMSYLSLFTFFMLILVTADNFVQMFVWEGVGLCSYLLINFWFTRIQANKAAIKAMLVNRVGDVGLALGIF
... GVFIKCGAVDY--ATVFSLAPQLSNFT---
... LLFFNFENALNLIGILLFVAVGKSAQLGLHTWLPDAMEGPTPVSALIIHAATMVTAGVLLARCSPALLEYCPD
... ALFIISIIGMTAFFAATTALVQNDLKRVIAYSTCSQLGYMIFACGLSNYSVAVFHLANHAFFKALLFLGAGSV
... IHAVGDEQDMRKMGLRRLLPFTYAMMVGISLALMG--MPF-----
... LTGFYSKDVILEVGYATYSSASHFAYWLGSFAAFCTAFYSIRLLALCFLSEPN--GSRTFLLSA-----
... -----
... SEGSWPMGIVLGILAVPSMFIGYFSRDLFIGL-GTD----FWGNALFFLP-SNISIIDAEF-
... MSTGIKILPLCLSILGGFSSFILYRNYSR-----
... -----NLFLKTSILGRKLYTFLNRKWLFDKIYNDFITQNTLDLGYHFTYKSIDRGLIESLGPFGFS
... -NVLLDQVNSRLWHSYLYHYLVIL--GWSNLLF--GVWFIFGKFLPI
597 >YP_005090357_NAD5_Phaeodactylum_tricornutum
598 MY-----LLVVFLSAIGSCFAGLFG----KHLGPLGSIFVTTSCFLSLFISFFIFYEVALS-NSV--
... VYIKLT-TWISSEVLHVDWGFMFDSLATMCIVVISISFLVHLYSVEYMSHDPH-----
... LPRFMSYLSLFTFFMLILVTADNFVQMFVWEGVGLCSYLLINFWFTRIQANKAAIKAMIINRIGDFSLLIGII
... LIFANYKVDY--ATVAILSPFFKNSS---
... ASFLNFNLELLTTIGIFLFLGAVGKSAQLGLHTWLPDAMEGPTPVSALIIHAATMVTAGVFLIVRSSFIYEHTFS
... VLEFIAILGATTSLFASTTGLLQNDLKRVIAYSTCSQLGYMVFACGLSNYSVSVFHLNSHAFFKALLFLSAGSV
... IHAVNDEQDMRKMGLKLNLPFTYSTMIIGSLTLMG--FPF-----
... LAGFYSKDLILEVAYGKYNSTGHFCYFLGTTGAFLTAFYSIRLLIYLTFLSKPT--GFKKTICCA-----
... -----
... LDGQSICIALGCLAISLFIGYLTkdLLVGL-GSD----FFGNAIYVSV-KNLNMFDAEF-
... IPSFYKTLPVLSLCLGLLGFVLYNFKSK-----
... -----ELFLLKISDFGKKYYSFLNRKWFFDKIYNNCLGQVFFRFGYSTSYKFIDRGIFETLGPTGLS
... -LVSLRIASNLHKTQTGYLYHYTLAILIGLTLFISIRQMLFFMEHLLDYR
599 >YP_008999866_NAD5_Prasinoderma_coloniale
600 MY-----LVLLLLPTLGLTFCFFG----RAMGGRGTAILTTAVALSALLSFVGLYEVGYA-GSP--
... CALSLG-RWVHSEAFDAEWGFLFDLTMVMLCMITGVSSLVHLYSIGYMSADPH-----
... LPRFMTYLSAFTIFMMLLVGTGNNFLILFLGWEGVGLASYLLINFWFTRAQANKASIKAMIMNRVGDVGLALGIF
... GIYALFKSLDY--ATVFSTAHLHAEDV---
... LIFFGYEVHALTAIGCLLFIGAIGKSAQVGLHTWLPDAMEGPTPVSALIIHAATMVTAGVLLARVSPLLAYAPG
... ALQVTVVGATTALLGAVTGLTQNDMCRVIAYSTCSQLGYMVFAGVAVAYALYHMIHAFFKALLFLCAGSV
... IHAIGGEQDMRKMGLARLLPLTYACMVVGSALVG--FPY-----
... LGAFYSKDLVLEAAYSRGMATGLLAYLLGIFAAAFCTSYYSFRLFLVFWGESR--TPKAGVRLA-----
... -----
... HEGSWTMLIPLLVLTTCISIFGAEGLKEAFTGL-GTP----FWGGSLVAAG-GLTQSFEAEL-
```

```
600... VPLSAKLAPLVATGLGATLAYLVHLGPLRKL-----  
... -----ALKALTESQLGRTFYIFTNKRWFIDKIYAEVFGWSALFFGYHVTFKTIDKGLLEVFGPTGAK  
... -FSAASLIPALRLRSWTS�PHYASVLAFLCLILLLSILGPASGMLSIGIP  
601 >ADU04611_NAD5_Mesostigma_viride  
602 MY-----GTIIALPLIGSFCAGALG----RWLGRGAAFITTLFVTISTIFSWIAFYEVALS-GSF--  
... CYIPVG-AWILSEMFVSWLFLFDPLTVVMLIVVTSVSTLVHLYSISYMWSDPH-----  
... LPRFMSNLSIFTFFMLILVTAGNLVQMFLGWEGVGLASYLLINFWFTRLQANKSAIKAMLMNRVGDVGLALAIM  
... GIFYTFQSVDF--SVLLAL-SASEHSS-----  
... SSENFFTFVSLLLFVGSIGKSAQLGLHTWLPDAMEGPTPVSALIIHAATMVTAGVFLIARCSALFEQSVHASFLV  
... ALVGAMTAFFAATTGAAQNDLKRVIAYSTCSQLGYMVFASGLSHYDLSVFHLMNHAFKALLFLGAGSVIHALS  
... DEQDLRRMGGLVQLLPFTYTMMLIGSLSLVG--IPF-----  
... LTGFYSKDAILEVAYAKYTVSAHFAYWLGSLSVLTSTYSFQLLQSAFLTSTN--AKRFALAKI-----  
... -----  
... HESDLLLSIPLVLLALGSIFVGYLAKDMMIGL-GTD----FWSQSLFVQP-  
... YNVRLLAEAFATPISIKMVPLIFSFLGALIAHLLQNNKNVQTFIFS-----  
... -----  
... LLLFNPATDFLRSIYSFWLKRWLFDKVYNDFIVRPCMFGYVYVTFKTIDKGFLEWLGPLGIS-  
... YTIQKFGSTLSRFQSGYIYHYAFVMLIAFTTFISMQTPFAESTFQLQST  
603 >NP_054400_NAD5_Marchantia_paleacea  
604 MY-----LLIVILPLIGSFAAGFFG----RFLGSRGVAVVTTTCVSLSSIFSCIAFYEVALC-ASA--  
... CYIKIA-PWIFSELFDAAWGFLFDSLTVILLVVTIVSSLVHIYSISYMSDPH-----  
... SPRFFCYLSIFTFFMLMLVTGDNFIQLFLGWEGVGLASYLLINFWFTRIQANKAAIKAMLINRVGDFGLALGIM  
... GCFTIFQTVDF--STIFACASAFSEPHY-  
... FLFCNMGFHAITVICILVFIGAVGKSAQIGLHTWLPDAMEGPTPVSALIIHAATMVTAGVFMIIARCSPLFEYSPN  
... ALIVITFVGAMTSFFAATTGILQNDLKRVIAYSTCSQLGYMIFACGISNYSVSVFHLMNHACFKALLFLSAGSV  
... IHAMSDEQDMRKMGLASLLPFTYAMMLIGSLSLIG--FPF-----  
... LTGFYSKDVILELAYTKYTISGNFAFWLGSVSVFFTSYYSFRLFLTLFLAPTN--SFKRDLSRC-----  
... -----  
... HDAPILMAIPLILLAFGSIFVGYLAKDMMIGL-GTN----FWANSLFILP-  
... KNEILAESEFATPTIIKLIPILFSTLGSFVAYSVNFVNP-----  
... -----  
... LIFALKTSTFGNRLYCFNKRWFFDKVFNDFLARSFLRFGYEVSFKALDKGAIEILGPYGIS-  
... YTIRKMAQQISKIQSGFVYHYAFVMLLGLTIFISVIGLWDFISFWVDNR  
605 >YP_009047585_NAD5_Sphagnum_palustre  
606 MY-----LLIVTLPLLGSVAGAFG----RFLSSRGTAIVTSTCVSLSFILSLIAFYEVALE-ASA--  
... CYIKMA-PWIFSEMFDASWGFFFDSLTVIMLIVVTFVSSLVHIYSISYMFEDPH-----  
... SPRFMCYLSIFTFSMLMLVTGDNSIQLFLGWEGVGLASYLLINFWFTRLQANKAAIKAMLVNRVGDVGLALGIM  
... GRFTIFQTVDF--STLFACVSAFSEPHY-  
... LIFCNMCFHAITVICILLFIGAVGKSAQIGLHTWLPDAMEGPTPVSALIIHAATMVTAGVFMIIARCSPLFEYPPN  
... ALIVITFVGAMTSFFAATTGILQNDLKRVIAYSTCSQLGYMIFACGISNYSVSVFHLMNHAFKALLFLSAGSV  
... IHAMSDEQDMRKMGLASLLPFTYAMMFIGSLSLIG--FPF-----  
... CTGFYSKDVILELAYTKYTISGNFAFWLGSVSVFFTSYHSFRLFLTLFLAPTN--SFKQDILQC-----  
... -----  
... HDAPILMAIPLIFLAFGSIFAGYLAKDMMIGL-GTN----FWANSLFVLP-  
... KNEIIAESEFATPTIIKLIPILFSTLGAFVAYNINNVANQ-----  
... -----  
... FIFALKTSTLGNRLYCFNKRWFFDKVFNDFIVRSFLRFGYEVSFKVLDKGAIEILGPYGIS-  
... YTFRKLAKQISKLQSGFVYHYAFVMLIGLITIFITIIGLWDFISFWVDNR
```

```
607 >AJF36693_NAD5_Klebsormidium_flaccidum
608 MY-----LLIVTLPLLGCATSALFG----RFLGSRGAAIVTTSCVGTSLFSLVAFYEVALV-GSA--
... CTLQFA-PWFDSEMFIDASWGFLFDSLTVVMLIVVTLVSTLVHTYSISYMSSEDPF-----
... LPRFMCYLSIFTFFMLMLVSADNLIQMFLGWEGVGLASYLLINFWFTRLQANKAAIKAMLVNRVGDGFLALGIM
... SCFLVFQSDY--
... HVLFAVANEWAMKESESFVFCNMHVDALSAICLLL FVGAVGKSAQIGLHTWLPDAMEGPTPVSALIHAATMVTA
... GVFLIARCSPLFEYAPNALVVVTCMGAMTAFFAATTGILQNDLKRVIAYSTCSQLGYMVFACGISNYAVSIFHL
... MNHAFFKALLFLSAGSVIHAMSDEQDMRKMGGLNQVLPFTYAMMLIGSLALIG--FPF-----
... LTGFYSKDVILELAYTKYTISGHFAFWLGSLSVLFTSYYSFRLFLFTLENTN--AFKQDIKNA-----
-----
... HDAPPLMAAPLIVLAFGSLFVGYLCKDMMIGL-GTD----FWGQSIFVLP-
... DNSNLSESEFSTPQIVKLIPLLLSTLGAGIAYWINNHKNS-----
-----
... FVYDFKTSSLGRRFYTFLNKRWLFDKVLNEFLAQSVLRFYYSISFVTLDKGVIELLPYGGIA-
... TTMRTLSKRTSGLQSGLIYHYAFIMLIGLTVLITFIGLWDIVSFVWDSR
609 >NP_943684_NAD5_Chara_vulgaris
610 MY-----LLIVVLP LLGSLVAGVFG----RFLGSRGAALVTTTSCVSISSGLCFIAFYEVALG-ASA--
... CYIKFA-PWILSEMFIDASWGFLFDLTVVMLIVVTFVSSLVHIYSISYMSSEDPF-----
... LPRFMCYLSIFTFFMLMLVTGDNLIQMFLGWEGVGLASYLLINFWFTRLQANKAAIKAMLVNRVGDGFLALGIM
... GCFAIFQTVDF--STIFACASAFVW-EPS-
... FIFLNMKIHALTAICVLLFIGAVGKSAQIGLHTWLPDAMEGPTPVSALIHAATMVTAGVFMARCSPLFEYAPK
... ALIVITFVGAMTSFFAATTGILQNDLKRVIAYSTCSQLGYMVFACGISNYSVSVFHLMNHALFKALLFLSAGSV
... IHAMSDEQDMRKMGGLASLLPFTYAMMLIGSMLIG--FPF-----
... LTGFYSKDVILELAYTKYTISGNLAFWLGSLSVLFTSYYSFRLFLFTLAPTAN--AFKRDIERC-----
-----
... HDAPTLMAIPLILLAFGSLFVGYLAKDMMIGL-GTH----FWANSIFILP-
... KNEIMFSSEFATPRMMKLIPILFSAIGAFLAYRVNFCANK-----
-----
... FIYVLTSTLGTKCYCFLNKRWLFDKVFNDFIAKSFLRFYEVSLKTLDKGAISILGPYGIS-
... TTFRKLAKQISTLQSGFVYHYAFVMLIGLTIFFITIIIGLWDFISFWVDNR
611 >YP_009472097_NAD5_Arabidopsis_thaliana
612 MY-----LLIVFLPLLGS SVAGFFG----RFLGSEGS AIMTTTSCVFS SILSLIAFYEVALG-ASA--
... CYLRIA-PWISSEMFIDASWGFLFDSLTVVMLIVVTFISSLVHLYSISYMSSEDPH-----
... SPRFMCYLSIFTFFMLMLVTGDNFLQLFLGWEGVGLASYLLIHFWRTRLQADKAAIKAMLVNRVGDGFLALGIL
... GCFTLFQTVDF--STIFACASVPRNS-----
... WIFCNMRLNAISLICILLFIGAVGKSAQIGLHTWLPDAMEGPTPVSALIHAATMVTAGVFMARCSPLFEYSPT
... ALIVITFAGAMTSFLAATTGILQNDLKRVIAYSTCSQLGYMIFACGISNYSVSVFHLMNHAFFKALLFLSAGSV
... IHAMSDEQDMRKMGGCLASSFPLTYAMMLIGSLSLIG--FPF-----
... LTGFYSKDVILELAYTKYTISGNFAFWLGSISVLFTSYYSFRLFLFTLVPTN--SFGRDISRC-----
-----
... HDAPIPMAIP SILLALGSLFVGYLAKDMMIGL-GWN----FWANSLLVLP-
... KNEILAESEFAAPTIIKLIPIILFSTLGAFVAYNVNLVADQ-----
-----
... FQRAFQTSTFCNRLYSFFNKRWFFDQVLNDFLVRSLRFYEVSVFEALDKGAIEILGPYGIS-
... YTFRRLAERISQLQSGFVYHYAFAMLLGLTLFVTFFCMWDLSLSSWVDNR
613 >YP_588334_NAD5_Zea_mays
614 MY-----LLIVFLPLLGS SVAGFFG----RFLGSEGTAIMTTTSCVFS SILSLIAFYEVALG-ASA--
... CYLRIA-PWISSEMFIDASWGFFFDLTVVMLIVVTFISSLVHLYSISYMSSEDPH-----
```

```
614... SPRFMCYLSIFTFFMLMLVTGDNFLQLFLGWEGVGLASYLLIHFVWTRLQADKAAIKAMLVNRVGDGFLALGIF
... GCFTLFQTVDF--STIFACASAPRNE-----
... WIFCNMRFNAILICILLFIGAVGKSAQIGLHTWLPDAMEGPTPVSALIIHAATMVTAGVFMIIARCSPLFEYSPT
... ALIVITFAGAMTSFLAATTGILQNDLKRVIAYSTCSQLGYMIFACGISNYSVSVFHLMNHAFFKALLFLSAGSV
... IHAMSDEQDMRKMGGGLASSFPLTYAMMLMGSLSLIG--FPF-----
... LTGFYSKDVILELAYTKYTISGNFAFWLGSVSVLFTSYYSFRLFLTLVPTN--SFGDRDLRC-----
... -----
... HDAPIPMAIPLILLALGSLFVGYLAKDMMIGL-GTN----FWANSPFVLP-
... KNEILAESEFAAPTITKLIPILFSTSGASLAYNVNLVADQ-----
... -----
... FQRAFQTSTFCNRLYSFFNKRWFFDQVLNDFLVRSLFRFGYSVSFEALDKGAIEILGPYGIS-
... YTFRRLLAERISQLQSGSVYHYAFAMLLGSTPFVTFSRMWDSSLSSWVDSR
615 >ANA57055_NAD5_Pyramimonas_parkeae
616 MY-----LLLVLPLMGSLFAGFFG----RYLGYRGAGLFSSTCVGLSAIGSWVAFYEVGLS-GSP--
... CYLKFA-PWFHSEFFDASWGFLFDSL SVMLVTVTASTCIHLYSISYMGEDPH-----
... LPRFMSYLSIFTFFMLVLVTADNFIQMFLGWEGIGLASYLLINFWVTRLQANKAALKAMLVNKGIDFGLALGIL
... GVFQLVKTVDY--ASL FACVPYINESS---
... ICFFQWELDGLTLIACLLFLGVVGKSSQIGLHTWLPDAMEGPTPVSALIIHAATLVTAGVFLMARISPLLEYAPQ
... ALSLIAFTGAMTCFLAASTGIMQNDLKRVIAYSTCSQLGYMVFACGLSSYGVSI FHLMNHAFFKALLFLSAGSL
... IHALADEQDMRKMGGGLGRLLPYTYGMILIGSLSLAG--FPF-----
... LTGFYSKDVILEMAYAKYSLSGNFAYWLGALSVFFTSYYSFRLISLAFFAPTN--CIKGSIRTV-----
... -----
... HDAPFLLGAPLIPLALGSLFLGFLGKMMIGA-GST----FWGNALFILP-QNSLSIESEW-
... IPQNVKLLPLVLTIGGAITAYLINLVWIE-----
... -----SAFKIKTHWLGREIYLFNKRWLFDKVYNEFIAKTFMQFGYNVSFKSLDKGAFEIIGPYGLI
... -QSVPIILLKETS RFQSGFLYHYALIMLIGITFLIGLIGLPILNYWIDPR
617 >QIQ59668.1_Nad5_Trebouxia_sp._A1-2
618 MY-----LSLIFLPLLGSLCAGFFG----RFLGFRGACLITTSVFSSFIMSTVAFYEVALS-GSS--
... CYIKYS-SWFVSEMFDSWGFYFDLTVVMLVVVTSVSTLVHLYSISYMSGDPH-----
... LPRFMSYLSIFTFFMLVLVTADNFLQMFFGWEGVGLASYLLINFWVTRLQASKASIKAMLVNRVGDGFLSLGIM
... AIFSVFKSVDF--ATVFSCAPHFADTE---
... FLFCNIECTLLNVVCILLFIGAVGKSAQLGLHTWLPDAMEGPTPVSALIIHAATMVTAGVFLIARCSPLFEYAPN
... ALMIVTLVGGMTTFFAATTGIVQNDLKRVIAYSTCSQLGYMVFACGISNYSVGVFHLMNHAFFKALLFLSAGSV
... IHALSDEQDMRKMGGVQQLPFTYGMMLIGSLSLTG--FPF-----
... LTGFYSKDTILELAFASYTVNGNFAYWLGAI CVLFTSYYSFRLFLTLVPTN--LYKSSLKNT-----
... -----
... HDANFIMALPLILLAFGSIFVGYLKMMIGL-GTN----FWGNALFVLP-KNINLLESEY-
... IPQVQKMVPLFFTLGAF LAYLVNYSLFR-----
... -----ETYFIKTSWIGRKFYMLSKRWLFDKVYNDFIGQKNLDFGYRISFKTLDKGCFEILGPYGIS
... -FLFQNLTRYLSKLQSGMIYHYAVVMLLGVILLISIVGLWEFLEVFVDNR
619 >YP_717300.1_nad5_Ostreococcus_tauri
620 MY-----LLL VFLPFFGFLLVTVFG----RFFGYRGAPLLSTFAVMSSACLSFVALYEVGIC-GSP--
... CYVQFL-PWFQDMFVASWGFLFDSLTVIMCVVTVFVSSLVHIYSISYMGEDPH-----
... LPRFMSYLSVFTFFMLMLVTS DNFLQMFFGWEGVGVASYLLINFWYTRLQANKSAIKAMLVNRVGDGFLALGIM
... GIFHIFKAVDF--ETVFACASEFACHH---
... FLFFHMEVHTLTCISLLLFIGAIGKSAQLGLHTWLPDAMEGPTPVSALIIHAATMVTAGVFLIARCSPLVEYSSQ
... ALVVITLVGASTAFFAATTGVVQNDLKRVIAYSTCSQLGYMMFACGISQYALGVFHLMNHAFFKALLFLSAGSV
... IHALGDEQDMRKMGGVLRLPFTYSMMMLGSLALIG--FPY-----
```

620... LTGFYSKDVILEVAYAKYTLSGNFAYWLGSVSALFTSYYSFRLLYLTLFLASPQ--MLKSSVQNV-----  
-----  
... HDAPFLMGLSLCCLALGSIFGGFIAKDMMIGL-GTN----FWGNAVFTLP-TNTLVLESEY-  
... IPQAVKVFPIIFSILGAVFAVNLNGFGSS-----  
... -----FSYSLKTSVLGKQLYTFLNKRWLFDKVYNDFVARPSLHFGYTISFKLVDKGFLEMFGPTGIM  
... -QQSAFMRHFVKTQVQTGSIYHYAFMMFVSLTSLAFFLVATTSVGAFDTR  
621 >YP\_008994799\_NAD5\_Bathycoccus\_prasinus  
622 MY-----LTILFLPLLGLLAASGG----RFFGWRGTPLITTFVFLSSLFSFIAFYEVGIA-GSP--  
... CYIQLA-PWFTSEFFDATWGFMFDSLTVVMLVVVTFVSTLVHIYSISYMSDPH-----  
... LPRFMSYLSIFTFFMLMLVTADNFIQLFFGWEGVGLASYLLINFWYTRLQANKSAIKAMLVNRVGDFFGLALGII  
... ATFSLFKSVDF--ATVFACSAHFAENS---  
... FIFFHLEWHALSLICALLFVGAVGKSAQLGLHTWLPDAMEGPTPVSALHAATMVTAGVFMIA RCSPLFEQAPQ  
... TLILVTVTGALTAFFAATTGVVQNDLKRVIAYSTCSQLGYMVFACGISQYAVGVFHLMNHAFFKALLFLSAGAV  
... IHALADEQDMRKMGGTIKVL PFTYSMMFIGSLALIG--FPF-----  
... LTGFYSKDVILEVAYAKYTVAGTFTYWLGAVSALFTSYYSFRLFLTFIGPVN--SLKDSLKHV-----  
-----  
... HDAPFLMGFPLFLAFGSIFVGYLAKDMMIGM-GTQ----FWGNALFMGP-DHGLLVESEY-  
... IPQAIKYIPILFSFLGFLFALNLLNGAS-----  
... -----FSYSLKTSTFGRTLYIFLNKRWLFDKMYTDFVALPALFFGYNVSFKTLDKGLLEIVGPAGVI  
... -QTVSQGGRQLRKMQSGLIYHYAFIMLCSLTFLIAFVGLWDFFSFFVETH  
623 >YP\_009121385\_NAD5\_Thecamonas\_trahens  
624 MY-----SLIIFLPLIGSFAAGFFG----RLIGEKGAAIITTSAMVFSTLFSYVALYNLVVT-GNP--  
... VYIDLF-TWIDSGLFEARWGFTFDSLTVIMLIVVTTVSTLVHLYSTEY MAGDPH-----  
... VPRFMSYLSLFTFFMLMLVTSNNLIQLFFGWEGVGLASYLLINFWFTRIPANKAAIKAMIVNRVGDFFGLSLGIM  
... AIFFIKSVDF--ATIFALIPHFDGYT---  
... FVFFNDTYNIFNVICLLLFIGAVGKSAQIGLHTWLPDAMEGPTPVSALHAATMVTAGVFLIRCSALFEYAPD  
... VLLIVTFVGAVTALFAATAGMLQNDLKKVIAYSTCSQLGYMVFACGISNYSVSMFHLMNHAFFKALLFLSAGSV  
... IHAMADEQDMRKMGGIINLLPFTYTMILIGSLSLMG--FPF-----  
... LTGFYSKDVILELAFAYKYTITSSFSYWFGTLAAFFTA FYSFRLVYLTFISNTN--AYKKVMEQA-----  
-----  
... HDAPIRMAIPLIILLFGSIFVGYLTRDMIIGL-GTD----FWGNAIFILP-SNLNMIDSEF-  
... IPWNIKLIPVIFSLIGASLAFILNAFYDR-----  
... -----FLVDFKLSKGLRLYGFINKKWYVDNIYNEFIVKNFLAFGYHVSFKTIDRGLIEYIGPYGIV  
... -KLAQKFSNTISKLQTGYVNYTAMTLIGSILFITLIGLWDILNVFVDHR  
625 >BAA78087\_NAD5\_Dictyostelium\_discoideum\_3D  
626 MY-----IVNLILPLIGSIITGIFG----HKLGNRISIKI AVGCMMMLTAISSLYIGYEILLC-NSV--  
... VHFKLG-TWMQVGS LNVEYGLLYDSLTSIMIIVITCISSMVHLYSMDYMKEDPH-----  
... KTRFFSYLSLFTFFMMLLV TADNFVQLFFGWEGVGIMS YLLINFWYTRLQANKSALKAVILNRFGDFFGLFFGIL  
... LVFLVFKSVDF--SVIFTIAPFITEYT---  
... INLLGYEVNAITLIGSFIVIGVVGKSAQLGLHMWLPDAMEGPTPVSALLHAATMVTAGVFLVLR TSPLLSYSIT  
... ILNILTIIGALTTLFATTIGIVQNDIKRVIAYSTCSQLGYMIFACGLLNYNASIYHLTTHAFFKALLFLSAGSV  
... IHGLNDEQDMRKMGGVNL MPLTYQCMLIGTLALTG--FPF-----  
... LSGYYSKDIILET SYATYYWEGTFAAIIGYVAAF GTTFYSFRLIILTF FNKPR-MQYKTIAGV-----  
-----  
... HEASTNMVIPLVILALCSIFIGYVTKDFFVGL-GTP----VWNNSFFAYP-YNNLILESEV-  
... LQRELKLLPLFAFIYGVITPVL FYFNIKEID-----  
-----  
... RMINVKQNL MVKESYFFFVKKWYFDFLSRVLIVVPFFHLSYDVMNKNLDKGLWEKIGVTGVAKNEITLSTYISY



```
626... IVQTIILIIIVVGIFSFMTGFIYMELCIIIGILYICLPS
627 >YP_009476712_NAD5_Proteomonas_sulcata
628 MY-----LTIIFLPLVGCFFSGFFG----RFLSPKGSAFITILGIFIAFIFSLVAFFEVLGLS-LCP--
... CYIQLL-PWIDCELFASWGFMFDTISVGMCVTVTFISLLVHIYSTSYMSHDPH-----
... QPRFMAYLSLFTFFMLCLVTADNFIQLFLGWEGVGLCSYLLINFWFTRLQANKAAIKAMIINRIGDVGLALGVF
... AAFIVFKTTNF--SVIFSLVPYYVNHE----
... IFFFTYKCNAITLIGLLLFIGSVGKSAQLGLHTWLPDAMEGPTPVSALIIHAATMVTAGVFLIIRCSPLYEYES
... ALFIIIVIFGALTAFFAATIGLLQNDLKKIIAYSTCSQLGYMVFACGLSSYSVSMFHLVNHAYFKALLFLSAGSV
... IHALNNEQDMRRMGGLLQVLPFTYCMFVVGSLALMG--FPF-----
... LTGFYSKDAILEIAYAKYNFIGTFAHWLGIISAFFTAFYSFRLIYFTFVISP--GYKTNMQNA-----
... -----
... HDAPLLMGLPLFLLSVASIFIGYLTRDLYIGL-GTP----FWNNAIYTAP-QNLSYIDAEF-
... IPTSIKWLPIVIFSLGAILSIFLYHNCKQ-----
... -----ILYNLTSISLFRYIYAFLNRRWLFDRLQNDFIGDSFLKIGYSITYKKLDKGIIEVIGPKGII
... -NLTTNIGKQVISLQGLIHQYASLIFVGVIFIVIKITNFFHFPFIDIH
629 >BBD14148_NAD5_Ophirina_amphinema
630 MY-----LLIVFIPLVTSLSVGLGG----RFIGKLSQVLTSLGVLMSATLSSVAFYEVGIC-GSP--
... CYVEFL-PWISSDMLRVYWGQFDSLTVVMLVVVTVSTLVHLYSIGYMSDPH-----
... IPRFMSYLSLFTFFMLMLVTGDNLVQLFFGWEGVGVCSYLLISFWYTRIQANKAALKAMVMNRVGDGFLSLGIF
... ASFYVFKSLDY--ATIFSLAPYYVDFQ----
... IPFLYWSFGSLNLIGILLFVGAVGKSAQLGLHTWLPDAMEGPTPVSALIIHAATMVTAGVFLISRCSPLEYEYAPK
... ALLVVTIIGTTAFAATTGLVQNDLKRVIAYSTCSQLGYMIFACGLSGYSIGMFHLMNHAFKALLFLSAGSV
... IHALADEQDMRKMGGMLNIVPLTYTMMLIGSMSLMG--FPF-----
... LTGFYSKDVILEFSFAKYTIDSSVFWLGVISAFFTAFYSFRLIYLTFFGEPN--SIRSVVSKS-----
... -----
... HDAPVIMALPLMLLCLGSVFGYIFRDLIIGL-GTD----FWGSALYVSP-HNSAHIDSEF-
... IPHMVKLMPVCLSVLGALASLYVEKLLAL-----
... -----EIGSLYKTAIWL SVYKFLNGRWLFDSVYNYFVAEKLM SFGYHISFKTLDKGIIEFMGPSGLI
... -SLISTWSIRVSRNTGYLYHSAFLMMLGAVIVL--GVTRVCQMESDIA
631 >YP_007890522_NAD5_Andalucia_godoyi
632 MY-----LLIVFLPLLGSILAGLFG----RFLGRHGASLVSTTSVGLTCLFSWIAFYEVGIC-ESP--
... VYLTLL-PWIDSGMLTANWGFLFDSLTVVMLIVITTVSFLVHIYSTSYMSDPH-----
... LPRFMSYLSFFTFFMLMLVTADNFVQMFLGWEGVGLCSYLLINFWFTRLQANKAAIKAMIMNRIGDFGLSLGMM
... ALFAVFQALDF--STLFAIAPLFANQD---
... FLFLNFQVDLLTTICILLFVGSVGKSAQLGLHTWLPDAMEGPTPVSALIIHAATMVTAGVFLIVRCSPLEFYAPS
... ALLVTVFVGAMTAFAATTGMLQNDLKRVIAYSTCSQLGYMVFACGLSSYSVSMFHLMNHAFKALLFLSAGAV
... IHALADEQDMRRMGGLVQLLPFTYSMMLIGSLALMG--FPF-----
... LTGFYSKDVILELAYAKYSLDGTFAHWLGTVSAFFTSFYFRLLYLTFLTKTN--AYKSSVSHA-----
... -----
... HDAPFVMAFPLMVLALGSLFVGYLFRDMMIGL-GTS----FWGNSLFLVLP-EHLILIDSEF-
... IPYSIKSIPVLLSFGASLAWLLNHSYGA-----
... -----FLYELKTSSFGRDLYTFLNKRWLFDKVYNDYVGK VLLQFGYNVSYKTLDKGILEILGPYGII
... -RLVRHLSDRVSSFHTGYLYHYAFIMLIGVTL LISVIRFWDVLSQVVDPR
633 >AGH24310_NAD5_Reclinomonas_americana
634 MY-----LLIVFLPLLGSITAGFFG----RSLGKQGAIIITTSVALSSLFSMVAFYEVGLC-GSP--
... CYIRLF-NWIDSEMLHASWGFLFDSLTVVMLIVVTIVSSLVHLYSVGYMSHDPH-----
... LPRFMSYLSLFTFFMLMLVTGDNFVQMFLGWEGVGLCSYLLINFWFTRLQANKSAIKAMIMNRIGDFGLSLGMM
... AIFFIKSVDF--ITVFALSPYMTDAT---
```

```
634... IVFLNYEVHALTLICILLFVGAVGKSSQLGLHTWLPDAMEGPTPVSALIIHAATMVTAGVFLIARCSPIFEYAPT
... ALLVVTIVGAMTAFFAATTGLLQNDIKRVIAYSTCSQLGYMVFACGISGYSVGMFHLMNHAFFKALLFLSAGCV
... IHALADEQDMRRMGIVKIVPFTYGMMLIGSMLMG--FPF-----
... LTGFYSKDVILELAFAKYTIIDGTFAHWLGTVAFFTAFFYSFRLIYLTFLGETN--APRTIINHA-----
... -----
... HDAPFIMALPLMILAIGSIFVGFIMKDMMIGL-GTD-----FWGNSLFTHP-KNLTIESEF-
... IPTPIKLLPVILSIVGASLAIILNNFYAT-----
... -----FLVSLKTSLLGREIYSFLNKRWYFDIVYNEYVGKTLWFGYNISFKSVDKGLIEILGPYGLE
... -RLTRRLTSKVSALQTGYIYHYAFIMLLGVTLIITIIGLWDYISMWTDYR
635 >YP_009245579_NAD5_Diphylleia_rotans
636 MY-----LSIIVLPGIAALLAGFFG----RFLGPKGSSLITTTLVGITCFLSLTSLYEVGIL-GSV--
... CEIKLA-KWIESDLLDADWGFLFDSLTVSMLVVITSISTLVHLYSIDYMEEDPH-----
... LPRFMSYLSFFTFMLIILVTADNYLQMFVWEGVGLCSYLLINFWFTRIAANKSAMKAIIVNRIGDLGLILGII
... CLMTTFKSVDY--ETIFSIVSGSDLIT-----
... GVPSSILTLTLLLLFIGAVGKSAQIGLHTWLPDAMEGPTPVSALIIHAATMVTAGVFLIIRSSPLFIVAEDILVL
... MTIMGSLTALFAATSGLLQNDLKRVIAYSTCSQLGYMVFACGITSFATSFHFLANHAFFKALLFLSAGAVIHAL
... GDEQDMRKMGGILIRLLPFTYVMILIGSLSLMG--FPF-----
... LTGYYSKDVILEFAYSFVSFDSSFAYWLGTSIAFFTAFFYSIRLIYLTFTITETN--AYHSIIKNV-----
... -----
... HEVPLKMAIPLMILAFGSIFIGYLTKDLIIGF-GTP-----FWNNAIVLLP-N-----DAEF-
... LPFFIKLIPVIFSLFGAFLGYTLYSSNI-----
... -----LWNMPEQGSVLRVYVSFFNQKWYFDQLYNRFVQPLLKIGYHTTFKLLDKGIIIEILGPYGIA
... -SIIRYTVDRARYLQSGLIYHYTFIMVSGLILLLLVISQKEFSIITPFPI
637 >YP_009446429_NAD5_Ancoracysta_twista
638 MY-----LLIVFLPLLSALTVLSFG----RYLGREGSVLLTVSSLFITAAMSTTAFYEVALC-GSV--
... CHIKLA-PWITSELLEISWGFLFDSLTAVMLVVVTYVSALVHLYSVSYMEEDPH-----
... LPRFMSYLSLFTFFMLMLVTGDNFLQLFLGWEGVGLASYLLINFWYSRIQANKSAIKAMVMNRIGDFGLALGLM
... AIFAVFKSIDY--STVFATAPFFSNEN---
... FLFCNLELDQLTVICLLL FVGAVGKSAQLGLHTWLPDAMEGPTPVSALIIHAATMVTAGVFMICRCSPLFEYAPD
... ALFVITLVGASTAFFAATVGVVQNDLKRVIAYSTCSQLGYMVFSCGLSSYSVSMFHLMNHAFFKALLFLSAGSV
... IHAMGDEQDMRRMGLLNLLPFTYTMMLIGSLSLVG--FPF-----
... LTGFYSKDVILELAYGKYTVSGTFAHWLGSLSVFFTSFYSFRLIYLTFFINKTN--SHKSLIEGA-----
... -----
... HDAPIIMAIPMLILAVGSIFVGYVTKDLMIGL-GTT-----FWSHSLFVLP-VNMTSVESEF-
... LDASIKCIPLFFSGMGATVAFILCYANRR-----
... -----LNFRLTSNPVGRGIYTFLNKRWLVDVYVYGAAPLMRFGYSTSFRLLDTGFIQMFGRGLS
... -TLLLELSSLASRFQSGYVYHYAFIMVCGATILVGFINLWPFTSLYLSNK
639
```
