# Supplementary material
Source: PubMed Central journal article supplement (PMC11022542)
Supplement: aem.02099-23-s0003.pdf [file aem.02099-23-s0003.pdf]

```
1 >Globobulimina_NorI_GloG15_CONTIG49717:890-3289
2 M-----ADVA
3 PKEGEWILRPAKTNWIATLSNKNYWAFYFLVIVAICVGGIGYF--GEVAHYEVPPLCDFV
4 --G-PDGSVVISAKSINHGEVVFHLRGLMAYGSFLGDGSEGRPDYTAELHELAIGMTKH
5 YESKCLKHK-----TQHDVEALKPRVRMELR----NNAYD-LEKDVIV
6 LNSAQISAWKRIKTYRRIFAGADQG-----TSTL----TPN----MFITN
7 PTDIADLAGFFFWGAWMSAARPGEDYSYTHNWPHEPLAGNIPTAVILWSAISVLILWF
8 GLAATLFIYQQLDHENEDEEDIKT----KGQPLTTQDLET---GVVRETQVDCYKFFVLS
9 MLAFAIQVIAGVCCAIDFV---RPL-----GFS-ACYILGYNVLRSYHATFQIFWFFVA
10 WVGTTIWFLPRFQRRVPIGQKFLINLLFGGCCVVALGGAIGIPLGQTGYI-QGEMAYYFG
11 SQGWEFMELGRIFQDLLLCGFVLWILILFRGVYSYITWNT-IWSTPAWVFYGS LVMVWFL
12 FFSLKVTPKTNFIVSDFWRWMMVVMWVEVTFEVFTTVIVAFLYREMGLVSKKAAERATYI
13 AVMLFFLTATIGVGHNFYWIAKPTGVIAMGSAFSTTQVMPLILLTMDAWKFIQMRE----
14 KAELEQAKGNQKHIMRGVWLFMLGVNFWNVFGAGILGSFINLPVVNYMHSTYL TGNHAH
15 AAMWGVKGNIAIAGVLFVCVQHTVQEKYWSPKIVSVAFWSLNGGIAAQMFLSMFPAGLVHM
16 YTAMA EGLWAARTHDMYNSTIFQNLAKGRAFGGHI FLWGGLLPLVYFVVSRYFYLK-PVT
17 P-----NIDKNRKYDS-----F---WLDAAHTAPYSTKK-----
18 --LV
19 >Globobulimina_NorII_GloT15_NODE_10819:151-2556
20 MST-----DAKSY
21 PLIQDFVPSGTRNNWIATLSDKRWTFYFAIIVAICVSGIGYF--GGVAHYQNPPNCFDFV
22 --D-QNGKVVPQSMIKHGEEIFHLRGLMSYGSFLGDGSEHGVDYTAELHMMALSMGDF
23 YTAQLRQNTSR-----E---LAEHDMEAVKARVRLELR----ANTYE-EARDVVV
24 LNEAMVYAWKDLEKYHLRMHFEDGFG-----DLL----PN---ERFAK
25 KRVDSDMAAFFYWGWI SVAARPGEDYSYTHNWP HDPLVGNLPTAATILWSTLSVGVLV
26 GLGITLFIWQQRKDEIEA--DDGT----TGKPLTTQDLEL---GVVHPTQLACYKFFVLA
27 MIAFAIQVLGGIACSVVV---RPG-----GLT-LCMWIPYTVLRSYHTTFQIYWFFVA
28 WVGTTIFFLPRFQKPPAGQLFLINLLGVGCAIVAAGGLIGIPLGQGGYL-EGDMAYYFG
29 SQGWEFMELGRAFDILLGGFVLWIFILFRGVYSYITWDT-IWSTPAWLFYGS LVMVWFL
30 FFSLKVTPD TDFVVSDFWRWMMVVMWVEVTFEVFTTVIVAYLYREMGLVSKKGAERATYI
31 AVMLFFLTATIGVGHNFYWIAKPTGVIALGSAFSTTQVMPLILLTLDWKYIQVSE----
32 RAELERKKGNQKHVMKAAWL FLLGVNFWNVFGAGILGSFINMPIVNYYMHATYL TGNHAH
33 GAMFGVKGNVALAGVLFCAQHLVKEEAWSPKLLSLSFCMNGGIAAQMFLSLFPTGMYHM
34 YINMEGLYAARKFEVTQGYIFQTLAKGRAVGGHI FLWGGLLPLVYFILSRAAYLK-DAT
35 K-----NAPGKRYQS-----F---WLDSAHTAGYKVK-----
36 --VY
37 >Ga0066833_100066952
38 MTLVV-----
39 -PESVIPKAAAYDTNMAGKLANKNYWG VYGILVF AIIVLGTGYM--TGAAIFEVPPLVDFV
40 --S-ETGEVVLSTSKINHGE EIFHHRGLMSYGSMLGDGSEGRPDFTAELHIMAVSMGEF
41 YVKKHGDGQTDAG-----S---NSTYDMEAIKARVITELH----LNTWNGDDKGVIV
42 LSEAKISAWQAVRKHYRRVYYREEASVSGSEDEVSSADSAGSGRVGL---WSI---ERFAN
43 PGHADDLAAFFFWGAWCCVANRPSEDYSYTHNWPYDPLAGNTPTPEVMIWSVASL FVLFF
44 GLMITLYIYGQFP EEEEEP-----LTQQPLTTQDLEA---DIVRPTQQATYRFFVLA
45 IAAFFIQVVS GIACAIDFI---RPG-----GFS-VCQFLPFSVFRSYHTTFQIYWFFVA
46 WVGTTIFFLPRFSK-V PAAQHGLIDLLYIGCVVVALGGVIGIPLGQTGFL-EGPVAYYFG
47 SQGW EYMELGRFYQDVLLAGFVLWIVIMFRGVWPYLT LRR-AWSPPAWLFYGSIVMVAFL
48 FFSLKVTPKTNFIISDFWRWMMVVMWVEVTFEVFTTVIVSYLLVEMGLVTRKKA EKTYYI
```

49 AVMLFFLTATIGVGHNFYWIAKPTGVIALGSTFSTTQILPLILVTLDAWKIMQEKS-----  
50 RAEAEQKKGNQOQYVMKEVFQFVVGINFWNIIFGAGVLGSLVNLPIVNYLHSTYLTGCHAH  
51 GAMFGVKGNVALAGVLFVQHLVVEEKHWSGRLINISFWCLNGGMALMMFLSLFPTGLYQL  
52 FMVIKYGFWYARSAEIVHGPVFQFLLKLRPIGGHIFFEGLLPLLYFVFRGFKLK-NET  
53 D-----PKSMGKDRYRS-----T---WHIDEADTKK-----

54 --EQ

55 >Ga0066844\_100022823

56 MTLIA-----

57 -PESGIPKATYDTNMAGKLSNKKYWGVIIVIAIIVLGNGYM--TGAAISEVPPLVDFV  
58 --S-ETGEVIMSTSKINHGEEIFHHRGLMSYGSVLGDGSEKPDFTAEALHIMAVSMGEF  
59 YVEKHGQTDAG-----A---GSAYDMEAIKARVIAELH----LNTWNGDDNGVIV  
60 LNEAKIFAWQAVRKYRYYRYYREEASVSGSED-----GGL---WPT---ERFAN  
61 PEHADDLAAFFFWGAWCCVANRPSSESYTHNWPYDPLAGNTPTPEVMIWSVASLFFVLF

62 GLMITLYIYGQFPEDDEP-----LTQQPLTTQDLEA---DIVRPTQRATYKFFVLA  
63 IAAFFIQVISGIAAIDFI---RPG-----GFS-VCEFIPFSVFRSYHTTFQIYFFFVA  
64 WVGATIFFLPRFSK-VPTAQHGLIDLLYIGCIAVALGGVIGIPLGQTGYL-EGPMAYYFG  
65 SQGWEYMELGRFYQDVLLAGFVLWIVIMFRGVWPFLTWKR-VWSPPAWLFYGSVIMVAFL  
66 FFSKLVTPKTNFIISDFWRWVHMWVEVTFEVFTTVIVSYLLVEMGLVTRKMAEKTTYI

67 AVMLFFLTATIGVGHNFYWIAKPTGVIALGSTFSTTQILPLILITLDAWKIMQEKS-----  
68 RAEAEQKKGNQMYVMKEVFQFVVAINFWNIIFGAGVLGSLVNLPIVNYLHSTYITGCHAH  
69 GAMFGVKGNVALAGVLFVQHLVKEKHWSGRLNINISFWCLNGGMALMMFISLFPGLYQL  
70 FMVIKYGFWYARSAEIVQGPVFQFLLKLRPIGGHIFFEGLLPLVYFIFSRWYTVK-NET  
71 D-----PKSKEENMYRS-----T---WHIDESDTKK-----

72 --VQ

73 >MBS93797\_Chromatiales\_NP37

74 M-----

75 -----STSSQQNLALWLVNKKNLTHFMIVAGISIAGLIYL--GGATYTGAPPLVDYV  
76 --S-SSGDTVISQQQIKRGKELFHIRGLMSWGSFWGDGAERGPFTADALHRTVMGMRAF  
77 YGQDLEQRAG-----S---LTQHDQDAISVRVKREVVH----NNAYD-EEAGVIR  
78 LNDQVVSALGDLNAHYTRMFNDPAYS-----EAY---EPS---GLISD

79 PDDLRLDTAFFFWGGWVSAADRPGETYSYTHNWPDKDAGNEPTAATFFWSVFSVFALFV  
80 GVMIVLYAYGEMKEQPVDVFDQSNESQSGGQSLTTYDLEN---EYVRPTQRATYKFFVLA  
81 IIVFGCQILGGVIAATDFV---RPG-----GVS-LNEIIPFNVARSYHTLLQIFWFFMC  
82 WVGYTIFFLPRISK-VPPGQKSLINLLFFLCVVTGGGALVGIYMGQTGML-SDNMSYWFG  
83 SQGWEFMEELGRFFQFTLLAAFALWIWIIYRAVKPWLTRRN-VWSVPSWLLYGSIMVAFL

84 FFGLLVQPEMNFAISDYWRWVHMWVEVTFEVFTTVIVGYMLVQMGLITRMMMAERVIFL  
85 AVMLFLVTATIGISHNFYWIAKPTGIIALGSVFSTLQVLPLLLLTLDAWQMRQEGL-----  
86 KADKNVVEGKQTIIVMEGVWLFILGVNFWNIIFGAGVFGSMINLPIVNYEHATYLTGNHAH  
87 AAMFGVKGNIALGGMLFCCQHLFHKSANPKLVRTSFWSMNIGLVLMFLDLFPVGLYQT  
88 WWAYTDGTWYARSSEIVTGPVFSFLTYCRTIGGAVFIWGGLLPMWFILSRGTKLRRKEE  
89 E-----VEQGEWTVYEA-----D---WADQKDPALGG-----

90 ----

91 >MBT76598\_Chromatiales\_NP153\*\*

92 M-----

93 -----SNANQQNLALWLVNKKNLTHFLIVATICIAGLIYL--GGATYTGAPPLVDYV  
94 --S-ATGETVISQQQIKRGQELFHIRGLMSYGSFWGDGAERGPFTADALHRTVIGMRGF  
95 YAQEKENSGV-----V---LDKHDHGAIASRVKLEVVH----ENTYD-ENAGIIH  
96 INDAQIQAFNDLNDHYTQMFTNPDYTCYRDCANPS-----NEAF---LPS---GHISD

97 PDDLRLSAFFFWGGWVASTNRPGENYSYTHNWPGDKDAGNSPTAATFFWSVFSIFALFV  
98 GVMVVLAYAYGQMKEQPVDVFDSS--RNGGQSLTTYDLEN---EYVRPTQRATYKFFVLA  
99 VIVFGVQIIGGVIAATDFI---RPG-----GVS-LNDIIPFQVARSYHTLLQIFWFFMC  
100 WVGTYIFFLPRISK-VPPGQKALINLLFVLCVVTGGGALVGIYMGQTGML-SDSMSYWFG  
101 SQGWEFMELGRRFFQFTLLAAFALWIGIYRAVKPWLTRRN-LWSVPSWLLYGGSGIMVMFL  
102 FFGLLVQPEMNFAISDYWRWVHMWVEVTFEVFTTVIVGYMLVQMGLITRMAERVIFL  
103 AVMLFLITATIGISHNFYWIAKPTGIIALGSVFSTLQVLPLLLLTLDAWQMRQEGL-----  
104 TANKNVVEGKQTIIVMEGVWLFILGVNFWNIFGAGVFGSVVNLPIVNYEHATYLTGNHAH  
105 AAMFGVKGNIALGGMLFCCQHLFHKSAWNPKLVRTSFWSLNIGLVLMFLDLFPVGLYQT  
106 WIAYTEGTWYARSSEIVTGPVFSFLTYCRTIGGAVFIWGGLPLMWFILSRGFKLRRKEE  
107 E----VEQGEWTVYES-----E---WAEQNNPSLGG-----  
108 ----

109 >Ga0187827\_100036806

110 M-----  
111 -----STTSTSNQNIALWLVNKKNLTHFMIVSAICIAGLIYL--GGATYMGSPPLEDYV  
112 --SASTGETVITRTQIKRGQELFHIRGLMGYGSFWGDAERGPDFSADALHRTVMGMRSF  
113 YAQELADSGV-----A---PTEYDAGAIARVRGEVH----ENYYD-EVAGVIR  
114 INDAQISAFSDVVDHYTAMFNDPTYS-----EAF---EPS---GFISD  
115 PDDLELSAFFFWGGWVSAANRPGETYSYTHNWPNDPDAGNSPTAATFFWSVFSIFALFV  
116 GVMLVLYVYGMREQDQVDVFDTSGNENNGQSLTTYDLEN---EYVRPTQRATYKFFVLA  
117 MIVFLVQIIGGVLAATDFV---RPF-----GVS-MNDIIPFTVARSYHTLLQIFWFFMC  
118 WVGTYIFFLPRISK-VPPGQKTLINLLFVLCIVTGGGALAGIYMGQTGML-SDSAAWFG  
119 SQGWEFMELGRRFFQFTLLAAFALWIFIYRAVRPWLTKRN-LWSVPSWLLYGGSGIMVMFL  
120 FFGMLVQPD MNFAISDYWRWVHMWVEVTFEVFTTVIVGYMLVQMGLITRMAERVIFL  
121 AVMLFLITATIGISHNFYWIAKPTGIIALGSVFSTLQVLPLLLLTLDAWQMRQEGH-----  
122 TATQNMMEGKQTIIVMEGVWLFILGVNFWNIFGAGVLGSVINLPIVNYEHATYLTGNHAH  
123 AAMFGVKGNIALGGMLFCCQHLFHKAAWNPKLVRTSFWSLNIGLALMMFLDLFPVGLYQT  
124 WIAYTEGTWYARSSEIVTGPVFSFLTYCRTIGGMVFIWGGLVPMVWFILSRGTKLRLKEE  
125 D----VAEGEWTVYEQ-----A---WSEQNDPSLGG-----  
126 ----

127 >Ga0187827\_100071743\*

128 M-----  
129 -----STTSNQNIALWLVNKKNLTHFMIVSAICIAGLIYL--GGATYMGSPPLEDYV  
130 --SASTGETVISRTQIKRGQELFHIRGLMGWGSFWGDAERGPDFSADALHRTVLGMRSF  
131 YAQELENSGV-----S---PTEYDAGAIASRVRDEVH----VNNYD-EVAGVIR  
132 INDAQISAFADLNEHYTAVFNDPTYS-----EAF---EPS---GFISD  
133 PDDLTAFFFWGGWVSAANRPGENYSYTHNWPNDPDAGNSPTAATFFWSVFSIFALFV  
134 GVMLVLYVYGMREQDQVDVFDTSAGNENNGQSLTTYDLEN---EYVRPTQRATYKFFVLA  
135 MVVFLVQIIGGVVAATDFV---RPG-----GVS-LNEIIPFTVARSYHTLLQIFWFFMC  
136 WVGTYIFFLPRISK-VPPGQKSLINALFVLCVVTGGGALAGIYMGQTGML-SDGAAYWFG  
137 SQGWEFVELGRFFQFTLLAAFALWIFIYRAVKPWLTKRN-LWSVPSWLLYGGSGIMVMFL  
138 FFGMLVQPD MNFAISDYWRWVHMWVEVTFEVFTTVIVGYMLVQMGLITRMAERVIFL  
139 AVMLFLITATIGISHNFYWIAKPTGIIALGSVFSTLQVLPLLLLTLDAWQMRQEGH-----  
140 TATKNMIEGKQSIIVMEGVWLFILGVNFWNIFGAGVLGSVINLPIVNYEHATYLTGNHAH  
141 AAMFGVKGNIALGGMLFCCQHLFHKAAWNPKLVRTSFWSLNIGLALMMFLDLFPVGLYQT  
142 WWAYTDGTWYARSSEIVTGPVFTFLTYCRTIGGMVFIWGGLVPMVWFILSRGTKLRLKEE  
143 D----VAEGEWTVYEN-----A---WSDQKDPSSLGG-----  
144 ----

145 >RLA57063\_Gammaproteobacterium\_B36\_G6  
146 M-----  
147 -----SSQNLTGTVLTSRKNWFGVFLLVAAISVAGLIYL--GGATYTGAPPLENIE  
148 --S--STGDVIISRDIHKGETVFHLRGLMSWGSFWGDGGERGPDFTADALHRTAMSMRRF  
149 YELEVEANSR-----P---ATQYDKDAISVRVRELH----NNAYD--EDRGLIE  
150 INDAQIFALKELNEHYTSMFMDPSYS-----EAF---DPA---GYISD  
151 PTDIKNLTAFFFWGGWVSAANRPGENYSYTHNWPGDKAAGNAPTSATFMWSVFSVFALIL  
152 GISAVLYVYGGEMKDQDQDMFEAEE-----GTTLTTYDLEN---EYVRPTQKATYKFFVLA  
153 IIVFAVQIIAGTIIATDFV---RPG-----GMS--LNEIIPFPIARSYHTLLQIFWFFMC  
154 WVGYTIFFLPRISK-VPTGQKLLIDVLFVLCITGVGSIVGIYLGQSGVL-TGDAAYWLG  
155 SQGWEFMEGRFFQLTLLSSFALWIFIYRAVKPWLTAKN-MWSVPSWLLYGGSGIMVFFL  
156 FFGFLIQPEMNFAIADYWRWVHMWVEVTFEVFTTVIIGYMLVQMGMITRMAERVIPL  
157 AVMLFLITATIGISHNFYWIAKPTGIIALGSVFSTLQVPLLLLLTLDWQMREEGH----  
158 WANKNRMAGKQNHVMEGVWLFILGVNFWNIFGAGVLGSVINLPVNYEHATYLTGNHAH  
159 AAMFGVKGNIALGGMLFCCQHLFHKEAWNAKLVKTAFWSLNIGLAMMMFLDMFWVGLYQT  
160 WVAFTDGTWYARSQAIATGNVFVYLT SARALGGLVFIGGLLPLVWFILSRGSKLRLKEE  
161 D----VEEGEWTVYEQ-----D---WSEQNDPALGG-----  
162 -----

163 >MBT4522754\_Halieaceae\_SI047\_bin19  
164 M-----  
165 -----SSQNLAITLMNRKNWFTIFLIVSAISIAGLIYL--GGATYTGAPPLENFE  
166 --S--STGNVVISRDQIKKGEEVFHLRGLMSWGSFWGDGAERGPDFTADALHRTAMSMRRF  
167 YEQEVADRTGQ-----A---ATQYDKDAISVQVIRELH----TNTYD--EDRGLIQ  
168 INDAQIFALKELNEHYTSMFTDADYY-----EAF---DPA---GYISD  
169 PDDIAKLTAFFFWGGWVAAANRPGESYSYTHNWPGDKDAGNFPTSATFMWSVFSIFALIL  
170 GVCIVLYVYGGQMKEEEQDMFEAEE-----GATLTTYDLEK---EYVRPTQKATYKFFMLA  
171 ILVFGVQILAGIIIATDFI---RPG-----GVS--LNEILPFPVARSLHTLLQIYWFFMC  
172 WVGYTIFFLPRISK-VPNGQRALINILFTLCLITGVGAIVGIFLGQTGII-TGQMAYWFG  
173 SQGWEFMELGRFFQFTLLASFALWILIIYRGVKPWLTMKN-MWSVPSWLLYGGSGIMVFFL  
174 FFGLLVQPD MNFAISDYWRWVHMWVEVTFEVFTTVIIGYMLVQMGMITRMAERVIPL  
175 AVMLFLITATIGISHNFYWIAKPTGIIALGSVFSTLQVPLLLLLTLDWKMREEGR----  
176 WADKNRIAGKQTHVMEGVWLFILGVNFWNIFGAGVFGSLINLPVNYEHATYLTGNHAH  
177 AAMFGVKGNIALGGMLFCCQHLFQKPAWNAKLVRTAFWSLNIGLAMMMFLDLFWVGLYQT  
178 WIAYTHGTWFARSQEIIVTGDVVFVYMTYARSLGGVFVFIGGLIPLIWFIMSRATKLRQEE  
179 D----VQEGEWTVYDK-----D---WGEQNNPALGG-----  
180 -----

181 >MBP20251\_Gammaproteobacterium\_NP964\*\*\*\*\*  
182 M-----  
183 -----SQNLAITLMNKNWAALFALVSAISIAGLIYL--GGATYTGSPPLENFK  
184 --A--ANGDIVISREAIKGGEEVFHLRGLMSWGSFWGDGGERGPDFTADALHRTAMSMREF  
185 YAQELGGSTSQYD-----T---LPQYDKDAIAARVIRELH----ANTYD--EESGFIG  
186 INDAEIIYAFEELNKHYTRMFTDASYE-----EAF---SPA---GYISE  
187 PDQLRDLTAFFFWGGWVSSSNRPGENYSYTHNWPGDKDAGNTPDATFMWSVFSIFALIF  
188 GIGAVLYVYGGQMKQPVDVFEAGDDNGNGQQLTTYDLEN---EYVRPTQRATYKFFMLA  
189 IIVFGVQILAGIIIATDFV---RPF-----GMD--LNELIPFTVARSYHTLLQIYWFFMC  
190 WVGYTIFFLPRISK-PPGQKGLIDLLFALCVITGAGAIFIGIYLGQTGVI-TGSMAYWFG  
191 SQGWEFMELGRFFQFTLLTSFALWILIIYRGVKPWLTTKN-MWSVPSWLLYGGSGIMVAFL  
192 FFGGLMIQPEMNFAISDYWRWVHMWVEVTFEVFTTVIIGYMLVQMGLITRLMAERVIYL

193 AVMLFLITATIGISHNFYWIAKPTGIIALGSVFSTLQVLPLLLLTLDWQMRQEGN-----  
194 SAEKNRVEGKQTFVMEGVWLFILGVNFWNIFGAGVFGSLINLPIVNYEHATYLTGNHAH  
195 AAMFGVKGNIALGGMLFCCQHLFTRTAWNAKLVKTAFWSMNIGLAMMMFMDLFWVGLYQT  
196 YVAF AEGTW MARSQEIVTGPV FVYLT SARALGGLVFIWGGLLPMMWFILSRGNKLRLKEE  
197 D-----VEEGEWTVYDK-----D---WSAQTDP SRGG-----  
198 -----

199 >MBV28360\_Rhodospirillaceae\_NP1106\*\*\*\*

200 M-----  
201 --SKESNGNSIHQNLALILLNKNYWITHFMIVVVISVVGLIYL--GRV TYTGAPPLVDYV  
202 --S--SAGDTVISREEIKRGE EVFHLRGLMSYGSFWGDGAERGPDFSADALHRTVVTMR SF  
203 YENEAKEKG-----A---VSQYDQDAIAAQVKRE VH----HNTWE--EDADLIR  
204 INDAQIYA FEELNVHYTKMFSDPDYP-----EHF---M-T---GYITD  
205 SEDIRALT AFFYWGGWVAAANRPGETYSYTHNWPYDPDAGNTPTSANYIWSIISILALFL  
206 GIGVVLYVY GQMKS LGGEPFSGN-----GTSLTTHDLEN---EYVRPTQRATYKFFALA  
207 VILFGIQVLAGIISATDFV---R PY-----GLY-LGDIIPFTVARSYHTLFQIFWFFMC  
208 WVG YTIFFLPRLAK-VPNGQAF LINLLFALCII VGGGALVGIYLGQTGVL-TGPAAYWFG  
209 SQGW EFMELGRA FQIILLMAFALWIAIIYRGVKPWLTKKN-LWSVPAWLLYGS GIMVAFL  
210 FFGLLVTPDTNF AIADYWRWMVVMWVEVTFEVFTTVIVAYMLVQMGLVTRMMAERVIFL  
211 AVILFLITATLGISHNFYWIAKPTGIIAIGSVFSTLQVLPLLLLTLDWAKMRQEGE-----  
212 RANEYVAQ GKQKFLMDGVW MFILAVNFWNIFGAGVFGSLINLPIVNYFEHATYLTGNHAH  
213 AAMFGVKGNIALGGMLFCCMHLFHKASWNP KLVMTSFWSLNIGLALMMFLDLFPVGVYQL  
214 VAVLQ EGLWYARSYEIVQGVVFQTLTYFRSLGGAVFVIGLLPLIWFVLSRGSQLR-REV  
215 E----VKDGEWSVYEK-----H---WATQEDSKLLG-----  
216 -----

217 >MBL6933931\_Alphaproteobacteria\_S150m-G7\_BlackSea

218 M-----  
219 ----KSN GNSIHTNLALILLNKNYWIWHFLV VVVIGVVGLIYL--GRATYTGAPPLVDYV  
220 --S--SAGDTVISREEIKKGE EVFHLRGLMSYGSFWGDGAERGP DFTADALHRTVVAMKSF  
221 YEDARSKETS R-----T---VSQHDKDAIAARVKREVR----KNTWD-EDANLIQ  
222 INPAQAHA FEELNDHYTKMFSDPEYP-----EFF---M-S---GYITD  
223 PEDIRNLTA FFYWGGWVAAANRPGETYSYTHNWPYDPDAGNTPTSATNIWSIISILALFL  
224 GIGVILYVY GQMKTLQGD PFASN-----GTSLTTHDLEN---EYVRPTQRATYKFFALA  
225 VILFGLQVLAGIISATDFV---RPF-----GLY-LGDIIPFTVARSYHTLFQIFWFFMC  
226 WVG YTIFFLPRLAK-VP SGQAF LINLLFALCMVVGAGSLVGIYLGQTGIL-TGPAAYWFG  
227 SQGW EFMELGRA FQIILLVAFALWILIIYRGVKPWLTKKN-LWSVPAWLLYGS GIMVAFL  
228 FFGLLVTPETNF AIADYWRWMVVMWVEVTFEVFTTVIVAYMLVQMGLVTRMMAERVIFL  
229 AVMLFLITATLGISHNFYWIAKPTGIIAIGSVFSTLQVLPLLLLTLDWQMRQEGE-----  
230 RANEYVAQ GKQRFLMDGVWLFILAVNFWNIFGAGVFGSLINLPIVNYFEHGTYLTGNHAH  
231 AAMFGVKGNIALGGMLFCCMHLFHRASWNP KLIKTAFWSLNIGVALMMFLDLFPVGVYQL  
232 VAVLQ EGYWYARSHEIVQGVVFQTLTYFRSIGGAVFVIGLLPLIWFILSRGFQLR-REV  
233 E----VKDGEWSVYEK-----N---WATQEDPKLLG-----  
234 -----

235 >MBT5374662\_Rhodospirillaceae\_SI074\_bin107

236 M-----  
237 --STQSYKSSNRGNLALILLNKNYWIWHFLIVVVIGVVGLIYL--GRLTYTGAPPLVDFT  
238 --S--STGETVISLQEIKHGQEVFHLRGLMSYGSFWGDGAERGP DFTADALHRTVVAMKSF  
239 YENEAKEGG-----E---LSQYDEDAIAAQVKRE VH----TNTWD-EDAGIIR  
240 INAAQIYAIGELNDHYTRMFSDPDYP-----EFF---M-S---GYITD

241 PADIKGLTAFYWGVAANRPGEIYSYTHNWPYDPDAGNTPTSATYIWSIISILALFL  
242 GIGVVLVYVYQMKTLQGDPFVSN-----GTSLTTHDLEN---EYVRPTQRATYKFFALA  
243 VILFGLQVLGAVISATDFI---RPF-----GLY-MGDIIPFTVARSYHTLFQIFWFFMC  
244 WVGYTIFFLPRLSK-VPRGQKFLINLLFMLCIIVGGGSLVGIYLGQTGIL-TGEAAYWFG  
245 SQGWEFMELGRLFQIILLVAFTLWILIIYRGVKPWLTKKN-LWSVPAWLLYSGSIMVGFL  
246 FFGLLVSPDTNFAVADYWRMVMVHMWVEVTFEVFTTVIVAYMLVQMGLVTRLMAERVIFL  
247 AVMLFLLTATLGISHNFYWIAKPTGIIAIGSVFSTLQVLPLLLLTLDAWQMRQEGG----  
248 RASEYQSQGKQTFVMEGVWLFILAVNFWNIFGAGVFGSLINLPVINYFEHATYLTGNHAH  
249 AAMFGVKGNIALGGMLFCCMHLFKESSWNPGLIKIAFWSLNIGVAMMMFLDLFPVGVYQL  
250 MLVFQEGFWYARSQEVVQGTVFQTLTYFRSLGGAVFIIGLLPIIWFILSRGRHLR-REV  
251 N----VEDGEWSVYQK-----N---WAEQEDEKLPG-----  
252 ----

253 >Ga0066848\_100037855\*\*\*\*\*  
254 M-----  
255 ---SASAETNGRGDYALVLINKKYWVGLFLIVAASISVGLIYL--GRVTYTGAPPDANFV  
256 --S-STGEVLSRQLVARGEVVFHLRGLMGYGSFWGDGAERGPDSAEALHRSVVMRTF  
257 YENEIKKDR-----A---VTQFDRDAIGARVKREVEH---VNTWN-EEAGTVT  
258 LNDQVFAIQELNVHYTRMFMDPEYK-----HLF---Q-T---GYITD  
259 PEDIRALTAFYWGVAANRPGEVYSYTHNWPYDPAAGNYPTSAVYIWSILSIFALFL  
260 GIGAVLYVYVYQMKDLGGPEFDGT-----GTSLTTSLEN---EYVRPTQRATYKFFALA  
261 MILFGLQILAGIIGASDFI---RPF-----GIF-LGDLVPFTVARSYHTLFQIFWFFMC  
262 WVGYTIFFLPRLSK-VPPGQKFLINLLFVGCLIVGAGALVGIYLGQTGVL-TGSTAYWFG  
263 SQGWEFMELGRAQFILLGGFALWIFIYRGVVRTWLTNRN-MWSVPAWLLYSGSIMVGFL  
264 FFGIFVSPETNFAIADYWRMVMVHMWVEVTFEVFTTVIVAYMLVQMGLVTRLMAERIIFL  
265 AVMLFLITATIGISHNFYWIAKPTGIIALGSVFSTLQVLPLLLLTLDAWRMRQEGD----  
266 RAQEYRSQKQMFVMEGAWMFILAVNFWNIFGAGVFGSLVNLPIVINYFEHATYMTGNHAH  
267 AAMFGVKGNIALAGMLFCCQHLFKSSWNAKLVRTSFWSLNIGLGLMMFLDLFPVGVYQV  
268 VIVLQEGLWYARSVDVVRGVSFVTLTYFRMIGGGVFLGGLLPLIWFILSRGFSLV-REV  
269 E----VEEGEWVYK-----D---WAAQEDPSLRHSRPLAE-----  
270 ----

271 >Ga0187827\_100051115\*  
272 M-----  
273 ---SVSAENNHGEDFALILINKKYWMGLFLIVAASISGLIYL--GRATYTGAPPDANFI  
274 --S-SSGKTVLSRQLVSRGEEVVFHLRGLMSYGSFWGDGAERGPDTADALHRTVVAMRTF  
275 YENELKKER-----A---VTPYDKEAIAARVRLEVH---NNTWD-EKSGTIT  
276 LNDQIFAFDEVHKHYTSMFMDPNYP-----ELF---Q-T---GYITD  
277 PENIRALSAFFFWGGWVSAANRPGENYSYTHNWPYDPDAGNHPTSATYIWSFLSIFALFL  
278 GIGAVLYVYVYQMKVLGGPEFVEN-----GTSLTTSLEN---EYVRPTQRATYKFFALA  
279 MILFGLQVLAGIISATDFI---RPF-----GIF-LGDIIPFTVARSYHALFQIFWFFMC  
280 WVGYTIFFLPRLSK-VPSGQKFLINLLFLLCVITGGGALVGIYLGQTGALGTGEMAYWFG  
281 SQGWEFMELGRAQFVLLVAFALWIYIIYRGVKTWLTNRN-MWSVPAWLLYSGSIMVGFL  
282 FFGILVSPETNFAIADYWRMVMVHMWVEVTFEVFTTVIVGYMLVQMGLVTRLMAERIIFL  
283 AVMLFLITATIGISHNFYWIAKPTGIIALGSVFSTLQVLPLLLLTLDAWRMRQEGD----  
284 RAEHRAQKQMFVMEGVWMFILAVNFWNIFGAGVFGSLINLPVINYFEHATYMTGNHAH  
285 AAMFGVKGNIALAGMLFCCQHLFKNSWNPGLVRTSFWSLNIGIAMMMFLDLFPVGVYQM  
286 VIVLQEGLWYARSSEIVMGTWVKTLYFRMIGGGVFLGGLLPLIWFILSRGMRLV-REV  
287 E----VEEGEWTVYK-----D---WAAQEDPTLRHSPGLAE-----  
288 ----

```
289 >0EJ69613_Magnetovibrio_blakemorei_MV-1
290 M-----
291 --SSKLNDKLRFKNLSLILLNKKFWFTHFLIVTIIISVAGLIYL--GQATYSGAPPLVHFK
292 --S--STGETVISRQLINAGERVFHLRGLMSYGSFWGDAERGPDFTADALHRMTVSMRSF
293 YAGELKAQGTQ-----D---LGQYDQDAIAARVRREVH----TNTWD--ESSDIL
294 LNEAQIFALEELNRHYTRMFTDPHY-----ELF---Q-I---GYITE
295 PKDIQALTAFFYWGAWVAANRPGEDYSYTHNWPYDPDAGNTPTTATFIWSAMSILGLFL
296 GIGIVLYVYQGMSMHYDPFNGNT-----GTSLTTHDLEN---NYIRPTQRGTYKFFALA
297 IVLFALQVLAGIIGATDFV---RPF-----GLF-LGDIIPFTVARSYHTLFQIFWFFMC
298 WVGYTIFFLPRLSE-APRGQTFLLINLLFTLCIIVGAGALVGIYLGQTGIL-TGDMAYWLG
299 SQGWEFMEFGRLFQIILLVAFTLWIFIIYRGVKPWLTRKN-MWSIPAWLLYGSVMVFFL
300 FFGLLVTPETNFAVADYWRWMVVMWVEVTFEVFTTVIVAYILVQMNLITRAMAERVVFL
301 AVMLFFITATVGLIAHNFYWIAKPTGVIAFGSVFSTLQVLPLLLLLTLDAWRMRQEK-----
302 RANTLRDQGKQTIVMDEVWLFILAVNFWNVFGAGVFGSVINLPVINYEHATYLTGNHAH
303 AAMFGVKGNIALAGLLFCCQHIFEKSSWNAKLIRRSFWSLNIQVAMMMFLDLFPVGVYQL
304 VDLVQNLWHARSYEIVQGDVFKLTLYFRSLGGAVFVIGGVIPLVWFILSRGRRLV-REV
305 Q----IEPNSHTDYEK-----D---WAAQEDAP-----H-
306 ----
307 >MBT38371_Deltaproteobacterium_NP36*****
308 M-----
309 -----SNSSRTIAQILQDKKTWWLHFLIVAAICVTGLVYL--GTETYTGAPPLEDYV
310 --S--ASGETVISREQIKHGQEVFHLRGLMSYGSFWGDAERGPDFTADALHRTVMSMRAF
311 YEKEMGGA-----TTVYDKDAVAARVRREVH----TNTWD--ERAGHIV
312 ISPAQTQGYNDLIVHYTAMFNPNYN-----EAF---EPA---GYISD
313 PEDLRDLSAFFFWGGWVSAANRPGEEYSYTHNWPYDPDAGNATSQTWIWSFISIFGLFL
314 GILVVLYVYQGQFKEQ-GDPFIGN-----GTSLTNDLEE---GRVRATQRATYKFFVFS
315 ILLFGAQLAGIFASMDFV---RPF-----GFS-LGDIIPFTVLRSYHTLFQIYWFFMA
316 WVGYTIFFLPRISK-VPNGQIGLINGLFALCIVTGVGALVGIYAGQTGMI-TGATAYWFG
317 SQGWEFMEIGRAFQYTLGSGFALWIYIIYRGVKPWLTTKN-IWSVPSWLLYGSIMVAFL
318 FFGLMISPEQNFAVSDYWRWMVVMWVEVTFEVFTTVIVGYILVQMGLISRMMCERVIFL
319 AVMMFLVTATLGISHNFYWIAKPTGIIAVGGVFSTLQVLPLLLLLTLDAWRGKSEAG-----
320 RARTHVTEGRQVFMMEGVWLFMLAVNFWNIFGAGVFGSLINLPVINYEHATYMTGNHAH
321 AAMFGVKGNIALGGMLFCIQHLVHKEAWSPKLVRTAFWSLQIGVALMMFLDLFPVGLYQI
322 MIVVQDGLWFARSQEILTGPVWTLTYFRSLGGTLFLLGGVPLIYFIVTRGSELK-EEA
323 D----SDEGEWTVYEK-----D---WAA-----
324 ----
325 >MBW2395684_Deltaproteobacterium_Meg19_02_Bin_150
326 M-----
327 -----SSSGRNLAQVLQDKNTWWVHFLIVTAICATGLIYL--GTQTYSGAPPLESYK
328 --S--ADGATVISREQIKHGQEVFHLRGLMSYGSFWGDAERGPDFTADALHRTVVTMRTF
329 YANELGGV-----VSQYDEDAIAARVRRELH----TNTWD--EEAGHIV
330 INAAQIQAYEDLVVHYTAMFNDPGYG-----EAF---EPA---GYISD
331 PTDLRDLTSFFFWGAWVSAANRPGQVYSYTHNWPYDPDAGNTATSQTWIWSFISIFGLFL
332 GILAILVYVYQGQFKEQ-GDPFEGD-----GTSLTNDLEE---GRVRATQRATYKFFIFS
333 IVLFGCQVLAGVFASMDFV---RPF-----GFS-LGDIIPFTVLRSYHTLFQIYWFFMA
334 WVGYTIFFLPRISK-VPNGQLFLINLLFAICCVTGAGALVGIYAGQTGMI-TGATAYWFG
335 SQGWEFMEIGRAFQYTLTSLFALWIYIIYRGVVRPWLTAKN-IWSVPSWLLYGSIMVGFL
336 FFGLMISPEQNFAVSDYWRWMVVMWVEVTFEVFTTVIVGYVLVQMGLISRMMMAERVIFL
```

```
337 AVMMFLVTATLGISHNFYWIAKPTGIIAVGGVFSTLQVLPLLLLTLDAWRMKSEAG-----
338 RAQTNVVQGRQIFVMEGVWLFILAVNFWNIFGAGVFGSLINLPVNYEYEHATYMTGNHAH
339 AAMFGVKGNIALGGMLFCIQHLIHKEAWNEQLVRRAFWSLQGGGLGMMFLDLFPVGLYQC
340 MIVVQEGLWFARSQEILTGTWVKTLTYFRSIGGTLFIVGGVPLIYFFITSARQLK-PEA
341 D-----SDEGEWTVYEK-----D---WAA-----
342 -----
343 >MBW2230945_Deltaproteobacterium_Meg19_46_Bin_91
344 M-----
345 -----SNPSRNLAQVLQDKRTWVHFLIVA AICATGLIYL--GTETYSGAPPLESFV
346 --SSSTGKVVSREQIKKGQEVFHLRGLMGYGSFWGDGAERGPDFTADALHRTVVTMRDF
347 YADEIAATQ-----A---VTQYDTDAIAARVRREIH----TNTWD-EKAEQIL
348 INDAQVQAYRDLVVHYTRMFNDSEYG-----EAF---EPA---GYISD
349 PQDLENLTAFFYWGAWVSGANRPGQVYSYTHNWPYDPDAGNTATSQTWIWSFISILGLFL
350 GILAVLYVYGQFKEQ-GDPFEGN-----GTSLTNDLEE---GRVRATQRATYKFFVFS
351 IVLFGCQVLAMFASMDFV---RPF-----GFS-LGDIIPFTVLRSYHTLFQIYWFFMA
352 WVGYTIFFLPRISR-VPNGQLFLINALFAICMVTGAGALVGIYAGQTGMI-TGQTAYWFG
353 SQGWEFMEIGRFFQYTLSSFALWIYIIFRAVRPWLTAKN-IWSVPSWLLYSGGIMVAFL
354 FFGLMISPEQNFAVSDYWRWMVVMWVEVTFEVFTTVIVGYILVQMGLISRVMCERVIFL
355 AVMMFLVTATLGISHNFYWIAKPTGIIAVGGVFSTLQVLPLLLLTLDAWRMKSEAG-----
356 RANTNLVAGRQIHVMEGVWLFILAVNFWNIFGAGVFGSLINLPVNYEYEHATYMTGNHAH
357 AAMFGVKGNIALGGMLFCVQHLSKEAWNEKLVRTSFWSLNLGMALMMFLDLFPVGLYQC
358 MIVVQEGLWYARSQEILTGTWVKTLTYFRSIGGTLFIVGGVIPLIWFFFITSATRLE-AEA
359 D-----SDEGEWTVYEK-----D---WAA-----
360 -----
361 >MAG34007_Deltaproteobacterium_ARS120
362 M-----
363 -----SDSNRNLAQILQDKKTWVHFLIVA AICVSGLLYL--GQQTYSGAPPLESFV
364 --T-ADGQTVFSREQIKQGQEVFHLRGLMGYGSFWGDGAERGPDFTADSLHRTVLSMRAF
365 YEEELGANQS-----E---LSLYDKDAVAARVRREVH----NNTWD-EQAGQIV
366 INDAQVRAYNDLVKHYTAMFNDDPYA-----EAF---EPT---GFISD
367 PEELRSLT AFFYWGWSAANRPGQVYSYTHNWPYDPDAGNTATSQTWIWSFISIFGLFL
368 GILAVLYIYGQFKEQ-GDPFVGN-----GTSLTNDLEE---GRVRATQRATYKYFIFS
369 IVLFGCQVVAGIFASMDFV---RPF-----GFS-LGEIIPFSVLRSYHTLFQIYWFFMA
370 WVGYTIFFLPRISR-VPTGQIALINGLFALCMVTGVGALVGIYAGQTGMI-TGSTAYWFG
371 SQGWEFMEIGRFFQYTLTTSFALWIYIIFRAVKPWLTAKN-IWSVPAWLLYSGGIMVAFL
372 FFGLMISPEQNFAVSDYWRWMVVMWVEVTFEVFTTVIVGYILVQMGLISRMMCERVIFL
373 AVMMFLVTATLGISHNFYWIAKPTGIIAVGGVFSTLQVLPLLLLTLDAWRGKSEGG-----
374 RAEKNVLAGRQAFLEMEGVWLFMLAVNFWNIFGAGVFGSLINLPVNYEYEHATYMTGNHAH
375 AAMFGVKGNIALGGMLFCIQHLIHKEAWNEQLVKRAFWSLQIGVALMMFLDLFPVGLYQC
376 MIVVQEGLWFARSQEILTGSVWVKTLTYFRSIGGTLFLVGGVPLIWFILKSATQMK-AEA
377 D-----SDEGEWTVYEK-----D---WAA-----
378 -----
379 >MBM4335308_Deltaproteobacterium_K_DeepCast_100m_m2_268
380 M-----
381 -----SNTKRNLAQVLHDKKTWVHFLIVA AICLSGLVYL--GTETYTGAPPIEDYV
382 --SATTGEVVIPLATIKKGQEVFHLRGLMLYGSFWGDGAERGPDFTADALHRTGVAMRSF
383 YEQQGGGN-----LAQYDKDAIDVRVIREIK----TNTWN-ESAKQIV
384 INDAQIHAFNELKAHYTRMFNDPEYE-----EAF---KPS---GAISA
```



385 PEDIEALTAFFFWGGWVSGAERPGQTYSYTHNWPYDPSTGNLPTNQTMVWSFISIFGLFL  
386 GILVILYVYGQFKEE-GDPFTGN-----GTSGTTNDLEQ---GRIRATQKATYKFFVFS  
387 IILFGAQVLSGMLAATDFV---TPF-----GVS-LASIIPFVSVLRSYHTLFQIYWFFMA  
388 WVGYTIFFLPRISK-VPNGQLFLINLLFAICMVTGVGALVGIYMGQTGMI-TGATAYWFG  
389 SQGWEFMELGRAFQYTLSSFALWIYIIYRSVRPWLTTKN-IWSVPSWLLYSGSIMVAFL  
390 FFGLMISPDQNWAVADYWRWMMVHMWVEVTFEVFTTVIVGYMLVQMGLISRMMCERVIFL  
391 AVMMFLVTATLGISHNFYWIAKPTGIIAVGGVFSTLQVLPLLLLTLDAWRMKSEAV-----  
392 RAKTHVAAGRQVFMMEGVWLFILAVNFWNIFGAGVFGSLINLPVNYEYHATYMTGNHAH  
393 AAMFGVKGNIALGGMLFCAQHLLTKADWSEKLVKNSFWSLQIGLLMMTLDLFPVGLYQL  
394 MIVFQEGLWYARSQEVITGPVWTFPTYMRSIGGTLFIVGGVPLIWL FVSRVGKLR-KET  
395 PEL--ESEGWTVYEK-----D---WAA-----  
396 -----

397 >Q0J32248\_Gammaproteobacterium\_H2\_PR01

398 M-----  
399 -STKAANVSTGDSNLAMWLLNKKNWFTFLIVAIISIAGLVYL--GRETYVGAPPLANFV  
400 --T-SNGQVLMTTEQLARGKEIFHLRGLMLYGSFWGDGAERGPDFTADAMHRIGASMRSY  
401 YEEETKRRTGAE-----S---LTGYEKDAIAQRVLREMH----NNTYN-AEAGTIV  
402 LNDAQVFAFDELLQHYTRMFTDPTY-----DRM---DPI---NQVSG  
403 EQNLRDLTTFYWGWSAANRPGEEYSYTHNWPYEPEVGNVPTTATFIWTFISIFALWI  
404 GISVVLYVYGMKEQPVDVFSQEG---ANGHSLTSDLEN---GYVRETQRSTYKFFALA  
405 MIVFGLQVLGGVSAWDFI---RPF-----GIN-LNELLPFTVSRSYHAILQIYWFMC  
406 WVGYTIFFLPRLTK-VPKGQKFLINLLFFLSCVAVGAVGGIYAGQRGWI-DDTMSYWFG  
407 SQGWEFIELGRFFQVWLLLGFSLWIYIIYRGVKPWISVKN-VWSVPAWLLWGSVMVFLFL  
408 FFSVLMTPDSNFAISDYWRWMTVHMWVEVTFEVFTTVIVAYLLVQMGLVTRMMAERVIFL  
409 AVMLFFVTAINGISHNFYWIAKPTGIIAVGSVFSTLQVLPLLLLTLDAWQMRQEGG-----  
410 RAHEFRVQGKQVVMEGVWLFILGVNFWNIFGAGVFGSLITLPVNYEYHATYMTGNHAH  
411 AAMFGVKGNVALAGMLFCLQHLFQKTAWNEKLVRTVFWSFQIGLALMMFLDLFPVGLYQI  
412 YVVLTEGLWYARSTEVIMGPVFATLTYLRTIGGAVFIFGGLLPIIYFVLSGASRLR-KEV  
413 D----VTTDEWAQYHKEYGNEGGKE---WAAQEELPKVSR-----  
414 -----

415 >MBC6944429\_Gammaproteobacterium\_PR03

416 M-----  
417 -STNAANVSTGDSNLAMWLLNKKNWFTFLIVAIISIAGLVYL--GRETYVGSPLANFV  
418 --T-SSGQVMTTEQLARGKEIFHLRGLMLYGSFWGDGAERGPDFTADSMHRIGASMRSY  
419 YEEETKRRTGAQ-----S---LTEYEKDAIAQRVLREMH----GNTYS-AEAGTIT  
420 LNDAQVFAYDELLTHYTRMFTDATYP-----DHM---DPI---NQVSG  
421 EQNLRDLTAFYWGWSAANRPGEEYSYTHNWPYEPEVGNVPTTATFIWTFISIFALWV  
422 GISVVLYVYGMKEQPVDVFSQEG---ANGHSLTSDLEN---GYVRETQRSTYKFFALA  
423 MIVFGLQVLGGVSAWDFI---RPF-----GIN-LNELLPFTVSRSYHAILQIYWFMC  
424 WVGYTIFFLPRLTK-VPKGQNFLINLLFVMSVIVALGCVFGIYAGQRGWI-DDKMAYLFG  
425 SQGWEFIELGRVFQWILLAAFSLWIYIIYRGVKPWISVKN-VWSVPAWLLWGSVMVFLFL  
426 FFSVLMTPDSNFAISDYWRWMTVHMWVEVTFEVFTTVIVAYLLVQMGLVTRMMAERVIFL  
427 AVMLFFVTAINGISHNFYWIAKPTGIIAVGSVFSTLQVLPLLLLTLDAWQMRQEGG-----  
428 RAHEFRVQGKQVVMEGVWLFILGVNFWNIFGAGVFGSLITLPVNYEYHATYMTGNHAH  
429 AAMFGVKGNVALAGMLFCLQHLFQKSAWNEKLVRTVFWSFQIGLALMMFLDLFPVGLYQI  
430 YVVLTEGLWYARSTDVIMGPVFATLTYLRSIGGAVFIFGGLIPIIYFVLSGAGRLR-KEV  
431 D----VTTDEWAQYHKEYGNEGGKE---WAAQEELPKVSR-----  
432 -----

```
433 >MBW7931464_Gammaproteobacterium_BROCD033
434 M-----
435 -STNAANVSPGDSNLAMWLLNKKNWFTFLIVAVISIAGLVYL--GQQTYSGAPPVADVF
436 --G-PNGEMIASDMLQHGKHFHIRGLMLYGSFWGDGAERGPDFTAEMHRIGASMSRSY
437 YEEEMKQRTGAS-----S---ITDYERDAIAQRVLKEMH----NNTYD-EATNKIT
438 LNDAQVFAFHELNEHYTRMFTDPTY-----ERM---EG----GQIQG
439 EETIRDLTAFWGGWVSAANRPGQEYSYTHNWPYEPEVGNVPTTATFIWTFISIFALWI
440 GISVVLYVYGQMKQPVDFVMGEG---GGHSLTSDLEN---GVRPTQRATYKFFVLA
441 MIVFGIQVFSGVIAAWDFI---KPF-----GIN-LNDLIPFSVRSYHAILQIFWFFMC
442 WVGYTIFFLPRLTK-VPKGQKSLINLLFLMSCIVAFGTVTGIYVQQRGWL-DETLGYWLG
443 SQGWEFIELGRLFQYILLAAFSLWIYIIYRGVKPWISMKN-IWSVPAWLLWGSIMVFL
444 FFSVLMTPSSNFAISDYWRWMTVHMWVEVTFEVFTTVIVAYLLVQMGLVTRVMAERVI
445 AVMLFLVTAINGISHNFYWIAKPTGIIAVGSVFSTLQVLPLLLLTLDWQMRQEGG----
446 RAHEFRVQKQVVMEGVWLFILGVNFWNIFGAGVFGSLITLPLVNYEHATYMTGNHAH
447 AAMFGVKGNVALAGMLFCMQHLVQKAAWSEKLVRMVFWFSFQIGLALMMFLDLFPVGLYQI
448 YVVLTEGLWYARSNEVVMGPVFATMTYMRTIGGSVFI FGGLLP IYFVLSRGGMR-DEV
449 D----VSSNEWADYHKEYGHEAGQE---WAAQEEPVKVA-----
450 ----
451 >MCC6201880_Gammaproteobacterium_SJ34
452 M-----
453 -ATEAVAPSGSNSNLAMWLLNKKNWFTFLIVAAISVVGLVYL--GQQTYSGAPPLVNFV
454 --T-KDGA VVFSKENIERGKELFHIRGLMAYGSFWGDGAERGPDFTAALHRTVLSMREF
455 YANEMKARNGVA-----E---LPLYEQDAIAQRVIRELH----GNTYD-ETAQHVV
456 LNEAQIYA FEELNKHYTRMFTDPTY-----DRM---DPV---NQLSG
457 ADNIRAVTAFWYGGWVSAANRPGESYSYTHNWPDPDAGNSATAATFIWTFASIFALWI
458 GISIVLYVYGQMKQPIDLFEAQN--SENSHWLTTSDLEN---GYVRPTQRATYKFFAPA
459 MIVFGCQVLAGIIGATDFL---RPF-----GIN-LNNLVPFTVARSYHTLLQIFWFFMC
460 WVGYTIFFLPRLAK-IPNGQKFLINLLFGIIVAVGALGGIYTQQRGWISDDKMAYWFG
461 SQGWEFIELGRFFQLLLLGGFTLWIYIIYRGVKPWLNRN-VWSVPAWLLYGSVMVFL
462 FFGVLMVPDSNFAISDYWRWVHMWVEVTFEVFTTVIVAYLLVQMGLVTRLMAERVI
463 AVMLFFVTALNGISHNFYWIAKPTGIIAVGSVFSTLQVLPLLLLTLDWQMRQEGN----
464 KADARRLQGKQTTVMNGVWLFILGVNFWNVFAGVFGSLITLPIVNYEHATYMTGNHAH
465 AAMFGVKGNIAIAGMLFCCQHLFPKSFNDLLIRRIFWALNIGIALMMFLDLFPVGLYQI
466 FHVVTGTWYARSTEIVMGPVFQTLTYLRMIGGAVFVLGGLLPIWVLSRGTLLR-QET
467 N----VETDEWSQYQEQYEGKEHGKE---WAAQPEPRA-----
468 ----
469 >MCC7257357_Gammaproteobacterium_SJ686
470 M-----
471 -STKAV-SNTGSSNLAMWMLNKKNWFAQFLIVAAISVVGLVYL--GQQTYSGAPPLVDFV
472 --S-STGEVVASEATIKRGKEVFHLRGLMGYGSFWGDGADRGPDFTADALHRTVVAMREF
473 YTEELKARNGTE-----T---LTAFETDAIGQRVIRELH----TNTYD-EAAGRIV
474 LTEGQIYALGELNKHYTRMFTDPTYK-----DRM---DPV---NQVSG
475 EDNLRAVSAFFWGGWVAAAANRPGEEYSYTHNWPYDPEAGNYATTATFVWTFISIFALWI
476 GIMVVLYVYGQMKLQVDFLDTQS---GNGHSLTSDLEN---GYVRPTQRSTYKFFALA
477 VIVFGLQVLAGIISATDFL---RPF-----GIN-LNELVPFTVRSYHTLLQIYWFFMC
478 WVGYTIFFLPRLTK-VPKQKFLINLLFVVAAVVAVGAVGGIYTQQRGWFGDDELSYWFG
479 SQGWEFIELGRFFQLLLLGGFTLWIYIIYRGVKPWLTMKN-IWSVPAWLLWGSVMVFL
480 FFSVLMTPSDNFAISDYWRWMTVHMWVEVTFEVFTTVIVAYLLVQMGLVTRLMAERVI
```

481 AVMLFFVTAINGISHNFYWIAKPTGIIAVGSVFSTLQVLP LLLLLTLDAWQMRQEGG-----  
482 RANELRVQ GKQAHVMEGVWVFILGVNFWNVFGAGVFGSLITLPLVNYEYEHATYMTLNHAH  
483 AAMFGVKGNVALAGLLFCCQHLFQKSAWNDKLVSTSFWSLNIGVGLMMFLDLFPVGVYQI  
484 WLVLTEGFYARSTEVITGPVFTLTYLRLMIGGALFVLGGLLPLIWFVLSRGNRLQ-KEA  
485 E-----VGTDEWAQYQKEYGKEAGRE---WATQEEPRV-----  
486 -----

487 >CBE69502\_Candidatus\_Methylomirabilis\_oxyfera\_DAM0\_2437

488 M-----SPN  
489 -PSGTAAGKKNERTFAQVLLIKKYWWLHALIVTAISTIGLIAL--GVWTYAGAPPLVNFV  
490 --S-KSGDVVIAEHSMNRGKQVFHLKGLMLYGSFWGDGAERGPDFTAELHRTFVSMGKY  
491 YEMQIEKEQGR-----P---ATQDEKDG IAGKV KREIH----QNGYD-AAAGVIR  
492 LNDAQIFAYNELVDHYTKMFTDPTYE-----EAFQKGRIQ---SYVSN  
493 PEDIKGLAGYFFWGGWVAGANRPGEIYSYTHNWPYDPDAGNLPTYATYIWSFLSILVLF  
494 GTMLVLYVYGEMKSLPGEPFN GRD-----WSLTTVDLENKGDAYVRPTQRATYKFFAFA  
495 VILFLVQVLAGILGAEDFV---GGGPGEAI-LGA-FGLVIPFSVRSYHAI VQIYWFFMA  
496 WVG YTLFFLPRISK-VPNGQRFLINLLFALCVLVGAGALFGIYAGHTGML-TDDMAYWFG  
497 SQGWEFLELGRFWHLMLASFCLWVYIIFRAVKPWITSQN-LWSVPAWLFYGS GIMVLF  
498 FFGMFMTPSQNFAISDYWRWMNIHMWVEVTFEVFTTCIVGYMLVQMGLVNRAMAERVI FL  
499 AVMMFLVTALIGISHNFYWIAKPTGIIALG SVFSTMQVLP LLLLITLDAWKMR TERT----  
500 KAHEHLSEGKQRFVMDGVWTFILAVNFWNIFGAGVMGSLINLPVNYEYEHGTYLTNNHAH  
501 GAMFGVKGNIAIAGMLFACQHLFQRSAWNEKLIKTVFWSLQVGI VMMMLMDMFPVGLYQL  
502 AHIFQYGFYGRQQS FVTNEVWHTLTWLR SIGGVVFLFGGVLP LCFWILSRAGRMV-REA  
503 AV---VEEGEWTIYDREKAK----EREAWAASDEAF-----  
504 -----

505 >WP\_107560883\_Candidatus\_Methylomirabilis\_limnetica

506 M-----SPN  
507 -PNEAVSKAKMHR TFAQALLIKKYWWLHALIVTAISVIGLIAL--GVWTYAGAPPLVNFV  
508 --SSTTGEVVIPEWEMNRGKQVFFL KGLMTYGSFWGDGAERGPDFTAELHRTSLSMGTH  
509 YRNEIAKTR-----A---VTQDDEMIKTRVAREIH----TNLYD-SAAGVIR  
510 LNDAQIFAYHELNTHYTRMFTDRTYV-----EAFQNGRIE---SYIKN  
511 PADIKALTGFFFWGGWVSGANRPGEVYSYTHNWPYDPAVGNFPTYATYIWSFLSIFVLF  
512 GTMLVLYVYGEMKTLPGEPFN GRD-----WSLTTVDLENKGDAYVRPTQRATYKFFAFA  
513 VILFLVQILAGIISAEDFI---GGGPVDAM-LGM-VGLTIPFSVARGWHLIVQIYWFFMA  
514 WVG YTIFFLPRISK-VPNGQRFLINLLFTLCVIVGAGALFGIYLGHTGFFANDEMAYWFG  
515 SQGWEFLELGRFWHLMLISFCLWVFIIFRAVKPWLT SQN-MWSVPAWLFYGS AIMVLF  
516 FFGMFMT PQQNFAISDYWRWMNIHMWVEVTFEVFTTCIVGYMLVQMGLVNRAMAERVI FL  
517 AVMMFLVTALIGISHNFYWIAKPTGIIALG SVFSTMQVLP LLLLITLDAWKMR TERV----  
518 KAHEAVAEGKQRFVMDGVWTFILAVNFWNIFGAGVMGSMINLP IINYYEYEHGTYVTSNHAH  
519 GAMFGVKGNIAIGGMLFACQHLFQRSAWNEKLIKTVFWSLQIGLVMMMMMDMFPVGLYQV  
520 AAI IQHGFYGRQQS FITNEVWHTLTL LRAIGGAVFLFGGVLP LTFWILSRGTRMV-REA  
521 AT---VEEGEWTIYDKEKAK----EREAWAASDEAF-----  
522 -----

523 >CBE69496\_Candidatus\_Methylomirabilis\_oxyfera\_\_DAM0\_2434

524 MR-----  
525 -SSSSSGMGKTNRTFGQALLIKKYWWLHALIVTVISVIGLVAL--GVWTYTSAPPLTNYV  
526 -LS-STGETVIPEWQIQRGKQVFHLKGLMTYGSFWGDGGERGPDFTAELHHTYVSMSKF  
527 YENEIAKER-----P---VTQADRD MISVRVKREIH----ENGYD-AAANIIR  
528 INPAQVFAYQELITHYTRMFTDATYE-----EAFMKGRIE---NHISS

529 PEDLKALAGYFFWGGWVSGANRPGFDYTYTHNWPPDPLVGNTPTFETYLWSFISIFVLFC  
530 GTMLVLYVYGEMKVLPGEPFNGRD-----WSLTTVDLENKGDAYVRPTQRATYKFFAFA  
531 VILFLVQVLAGILSAEDFV---GGPGSAIATTV-LGFTIPFTVTRGWHTIVQIYWFFMA  
532 WVGYTLLFFLPRISK-VPNGQRFLINLLFTLCLIVGAGALFGIYLGHGTGYM-TDDMAYWFG  
533 SQGWEFLELGRFWHILMLASFCLWVYIIFRAVKPWITSQN-LWSVPAWLFYGGSGIMVFLFL  
534 FFGMFMTPSQNFAIADYWRWMNIHMWVEVTFEVFTTCIVGYMLVQMGLVNRAMAERVI FL  
535 AVMMFLVTALIGISHNFYWIAKPTGIIALGSVFSTMQVLP LLLITLDAWKMRTERT-----  
536 KAHENIAEGKQRFVMDGVWTFILAVNFWNIFGAGVFGSLINLPVNYEYHGTYLTGNHAH  
537 AAMFGVKGNIAIAGMLFACQHLFQRSAWNEKLIKGI FWSLQVGLVLMMLDLFPVGLYQV  
538 ATVFKEGLWAARAQAHVTDVSWITLTMRTIGGAVFLFGGVLPLVYFILSRAGRMV-REA  
539 SV---VEEGEWTIYDREKAK-----EREAWAAGDEAF-----  
540 -----  
541 >WP\_107560884\_Candidatus\_Methylomirabilis\_limnetica  
542 M-----SPH  
543 -PSTPVSKAKVYRTFAQALLIKKYWWLHALIVGLISVVGLIAL--GWTYASAPPLVNFV  
544 AVS-NSGTVVIPEWEIQRGKQVFFLKGLMTYGSFWGDGGERGPDYTAELHHTSVSMRKY  
545 YSAEIVKSR-----P---LTQDDLGMIDSRVKREIH----TNLYD-EKAGVIA  
546 LNDAQIFAYQELITHYTRTFTDATYE-----EAFMKGRIE---NHISN  
547 PADLKALASFFWGGWVSGANRPGEDYSYTHNWPPDQSVNNYPTFPTYLWSFISIFVLFA  
548 GTMLVLYIYGEMKTLPGEPFNGRD-----WSLTTVDLENKGDAYVRPTQRATYKFFAFA  
549 VILFLVQILAGILSAEDFV---GGPGSFLATSV-LGFTIPFTVTRGWHLIVQIYWFFMA  
550 WVGYTLLFFLPRISK-VPNGQRFLINLLFTLCVIVGAGALFGIYFGHTGWFANDEMAYWFG  
551 SQGWEFLELGRFWHILMLSSFCLWVFIIFRAVRPWLTSQN-MWSVPAWLFYGGSGMMVFLFL  
552 FFGLFMTPTQNFAIADYWRWMNIHMWVEVTFEVFTTCIIGYMLVQMGLVNRAMAERVI FL  
553 AVMMFLVTALIGISHNFYWIAKPTGIIALGSVFSTMQVLP LLLITLDAWKMRTERI-----  
554 KAHEAVAEGKQRFVMDGVWTFILAVNFWNIFGAGIMGSMINLPVNYEYHGTYLTGSHAH  
555 AAMFGVKGNIAIAGMLFACQHLFQRSAWNEKLIKTI FWSLQIGLSLMIGLDLFPVGLYQV  
556 ATVFKEGLWAARAQSHVTDVSWVTLTWLRTIGGAI FLFGGVLPLAWFILSRGTRMV-REA  
557 AT---VEEGEWTIYDKEKAK-----ERESWAASDEAF-----  
558 -----  
559 >MBI3325094\_Nitrospinae\_NC\_groundwater\_833\_Pr1\_B  
560 MS-----SSTS  
561 -RASRSHNGSRRTFAQILLVKRYWWLHLLIVAAISTVGLVAL--GTWYTGSPPLADVF  
562 --SSTTGRTVIPLDQIQRGKEVFHLKGLMDYGSFWGDGATRGPDFTADALHRTVVYMRSF  
563 YENEMKDR-----P---VTQFERDGI AARVQRELH----ANAWD-ETAGVIR  
564 INDAQIHAYRELIGHYTRMFTDSTYP-----EAFQLGRIT---GYISD  
565 PADLKALAAFFWGGWVSAADRPGESYSYTHNWPYDPAAGNTPTFATMFWSVASILGLFL  
566 GIMLVLYVYGQMKTLPGDPFNGAN-----GGTLTIDLENKGDAYVRPTHRSTYKFFAFA  
567 VILFLVQVLAGILSAEDYV---RGGPGTAA-LNL-LGMTIPFTVTRSWHLILQIYWFFMC  
568 WVGYTIFFLPRLSR-VPNGQRFLINLLFAVCVLV GAGALFGIYLQGTGRL-SDRVAYWFG  
569 SQGWEFLELGRFWHILMLSAFVLWVGIIFRAVKPWITSQN-LWSVPAWLFYGGSGIMVAFL  
570 FFGMLMTPGQNFAISDYWRWMNIHMWVEVTFEVFTTCIIGYMLVQMGLVSRLVAERII FL  
571 AVMMFLVTALIGISHNFYWIAKPSGIIALGSVFSTMQVLP LVLITLDAWRMRAEKF-----  
572 RANEYLVOGKQQFVMDGVWMFILAVNFWNIVGAGVFGSLINLPVNYFEHSTYLTANHAH  
573 AAMFGVKGNVALGGMLFCCQHLFQRASWNAKLVKTVFWALNGGLVLMFFDLFPVGVYQL  
574 SVVFTHGFYARSQEVVTPVFTTLTWLRTLGGVVFLFGGVLPLVWFILSRARRLV-REV  
575 E-----VQEGEWTVYDKEKKGK-----D---WAAQEEPIPSA-----  
576 -----

```
577 >MBI2962797_Deltaproteobacterium_NC_groundwater_687_Ag
578 M-----QKSN
579 -VNRNRGSSKSRNFGTWLLAKPNWFIQFAIVSGISIVGLIAL--GSWTYSGAPPRVAMV
580 --SAASGEPVVPPIEQIRRGQELFHIRGLMSWGSFWGDGAERGPDFTADALHRTVVGMRSF
581 YERQMEKER-----P---LTQSDKDAITVRVQREIK----QNGYD-AAAGVIR
582 INDAQIHAYEELQTHYKRVFTDPTYP-----AKF---RLD---NYITD
583 PEDLRALTGYFFWGGWVAGAARPGETYSYTHNWPYDPEAGNPTMPTVLWSFLSILALFA
584 GAMLVLYVYGEMKALPGDPFNGAN-----GGTLTTIELEK-GYDFVRPTQRATYKFFAFA
585 VILFLVQVLGILSAEDFV---GGGPGEAI-VQV-FGISLPFTVVRAYHTILQIYWFFMC
586 WVGYTIFFLPRLSK-VPNGQRFLINLLFTLCVIVGAGALFGIYFGQMGYL-SDTAAYWFG
587 SQGWEFLELGRFHWILMLASFVLWITIIIFRGVWPWITKQN-MWSVPAWLFYGGSGIMVMFL
588 FFLGATTTSNFAIADYWRWMTVHMWVEVTFEVFTTCIVGYMLVQMGLLNRAMAERVI FL
589 AVMMFLITATVGISHNFYWIAKPTGIIALGSVFSTLQVLP LLLITLDAWRMRNEKI-----
590 RAGEHLVEGKQKQFVMEGVWLFVLAVNFWNIVGAGVFGSLINLPVINYFEHGTYLTGNHAH
591 AAMFGVKGNVALAGLLFCCQHLFPRLAWNEALLRRTFWSLQIGIVLMMTLDLFPVGLYQL
592 AAVLTHGYWYARTNEFVTGPVFATLTWMRVIGGVVFLFGGVLPLVWFVLSRGPKMV-REL
593 E----VEEGEWTVYDK-----D---WAAHEEEILRALK-----
594 ----
595 >MCC6766257_Deltaproteobacterium_SJ478
596 M-----HTD
597 -VKARTRNSRTRQNLGKWM LAKPNWLTQFAIVTAVSLLGLIAL--GTWTYGSAPPRVPFV
598 --SASTGKEVIPLSDILRGQELFHIRGLMSWGSFWGDGAERGPDFTA EALHHTVVSMSRSF
599 YEAQAASGG-----T---SSQTDRAIAVRVQREIK----ENGYD-EAAGVIR
600 INDAQIRAYQDLQTHYARVFTDPTYP-----AKF---RLA---NYITD
601 PNDLRALSAYFFWGGWVSGAKRPGEPYSYTHNWPYDPDAGNVPTTPTVMWSFLSILVLF A
602 GAMLVLYVYQG MKELPGDPFNGAN-----GGTLTTAELER-GYEFVRPTQRATYKFFAFA
603 VILFLAQVLGILSAEDFV---SGGPGTAI-VKV-LGVPFSFTVTRAWHTILQIYWFFMC
604 WVGYTIFFLPRLSR-VPNGQRFLINLLFALCVIVGAGALFGIYFGHMGYM-SDTASYWLG
605 SQGWEFMELGRFHWILMLASFVLWIAIIYRGVWPWITKQN-MWSVPAWLFYGGSGIMV LFL
606 FFLGATPSGNFAITDYWRWMTVHMWVEVTFEVFTTCIVAYLLVQMGLLNRSMAERVI FL
607 AVMMFLITAIIVGISHNFYWIAKPTGIIALGSVFSTMQVLP LLLMTLDAWRMRNEKL-----
608 RAGEHRAQGKQKQFVMEGVWLFILACNFWNIVGAGVFGSLINLPVINYFEHGTYLTHNHAH
609 AAMFGVKGNIALAGVLFCCQHLFPRAAWNEKLLRTSFWSLQAGLVLMMLVLDLFPVGLYQM
610 AAVVTHGFYARTNDFVTGPVWVKLTWLRITIGGVIFLFGGVLPLLWFILSRGRVLV-REL
611 E----LEEGEWTVYEK-----D---WAAHEEEIEHALTS-----
612 ----
613 >OQY65997_Polyangiaceae_bacterium_UTPR01
614 M-----HTD
615 VVKARGRTSRSRQNI GKWMLAKPNWLTQFAIVTAVSVTGLVAL--GMWTYGSAPPRVPFV
616 --SASTGKEVIPLADIVRGQEIFHIRGLMSWGSFWGDGAERGPDFTA EALHHTVVSMSRSF
617 YESAASKDR-----P---LAQADRDAIAMRVQREIK----DNGYD-EAAGVIR
618 INDAQIRAYEELQTHYTRVFTDPTYP-----AKF---RLA---NYITD
619 PNDLRAITAYFFWGGWVSGAKRPGETYSYTHNWPYDPEAGNVPTMPAVLWSFLSILVLFV
620 GTMLVLYVYGM RDLPGSPFNGAH-----GGTLTTSELER-GYEFVRPTQSATYKFFAFA
621 VILFLIQVLGILSAEDFI---GGGPGEAI-VKV-FGLALPFTVVRAWHTILQIYWFFMC
622 WVGYTIFFLPRLSH-VPKGQRFLINLLFAVCVIVGAGALFGIYFGHMGYL-SDTAAYWLG
623 SQGWEFVELGRFHWILMLSAFVLWIAIIIFRGVWPWITKQN-MWSVPAWLFYGGSGIMV LFL
624 FFLGATPTGNFAITDYWRWMTVHMWVEVTFEVFTTCIVAYLLVQMGLMNRAMAERVI FL
```

625 AVMMFLVTALVGISHNFYWIAKPTGIIALGSVFSTMQVLP LLLMTLDAWRMRNEKL-----  
626 RAAEHREAGKQQFVMEGVWLFILACNFWNIVGAGVFGSLINLP IVNYFEHGTYVTGNHAH  
627 AAMFGVKGNIALAGVLFCCQHLFPRAAWNEKLIKTSFWSFQIGLVLMMTL DLFVPVGLYQM  
628 AAVVQHGFWFARTNEFVTGPV FVTLTYLRVIGGMVFLFGLLPLLW FILSRGPRLV-REL  
629 D-----IEEGEWTVYGK-----D---WAAHEEEI LSALK-----

630 -----  
631 >MCC6850618\_Deltaproteobacterium\_SJ588

632 M-----NAN  
633 -VRTRTWSNRTRQN LGKWL LAKPNWLTQFAIVTSVSVLGLVAL--GTW TYGSAPPRVPFV  
634 --SATTGKEVIPLADLARGQELFHLRGLMSWGSFWGDGAERGP DFTA EALHRTVVSMSRF  
635 YEESAQNQ-----PSPEAAQADRDAITVRVQREIK----HNGYD-EAAGVIR  
636 INDAQIQAYQDLQAHYTRVFTDPTYP-----ARF---RLA---NYITD  
637 PNELRALTAFFFWGGWVSGAKRPGETYSYTHNWPYDPDAGNFPTT PAVVWSFSLV LFA  
638 GAMLVLYVYGQMKDLP GDFPNGAK-----GGTLTTYELER-GYEFVRPTQRATYKFFAFA  
639 LILFLVQVLAGILSAEDFV---SGGPG EAI-VKV-LGLSLPFTVVR AWHITLQIYWFFMC  
640 WVGYTIFFLPRLSR-VPKGQRFLINLLFALS VTVGAGVLFGIYFGHMGYL-TDSAAYWLG  
641 SQGWEFMELGRLWHIMMLGAFVLWIGIIFRGV RPWITKAN-MWSVPAWLFY GSGIMVFLFL  
642 FFGLGATPYQNFAITDYWRWMTVHMWVEVTFEVFTTCIVAYLLVQMGLMNRAMAERVI FL  
643 AVMMFVVTA VVGISHNFYWIAKPTGIIALGSVFSTMQVLP LLLMTLDAWRMRNEKL-----  
644 RAAEHQAAGRQTFVMEGVWLFV LACNFWNIVGAGVFGSLINLP IVNYFEHGTYVTGNHAH  
645 AAMFGVKGNIALAGVLFCCQHLFPRASWNEKLIKTSFWSFQIGLVLMMTL DLFVPVGLYQM  
646 AAVVTHGFWYARTNEFVTGPVWVILT WLRITIGGVIFLFGLLPMLW FILSRGLKLV-REL  
647 E-----LEEGEWTVYDK-----D---WAAHEEEI VHALK-----

648 -----  
649 >OFW12443\_Acidobacteria\_RIFCSLOW02\_02\_FULL\_67\_21

650 MV-----NHRN  
651 RPNGTGNGSKTQQNFGKWL LAKRNWVQFTVVAGISLVGLLAL--GVW TYAGAPPLTRFV  
652 --SSATGETV VPLDGIQRGREVFHLRGLMAWGSFWGDGAERGP DFTADALHRTNVAMKAY  
653 YEQGIAKER-----P---VTQTDRDAIAVRVQREIK----ANGYD-EAADVIR  
654 VNDAQIYALRELEAHYTRMFTDPTYS-----EAF---TLD---GYITD  
655 PDDLKALAAFFYWGGWVAGAARPGETYSYTHNWPYDPEVGNLPTMPTV VWSFSLV LFA  
656 GAMLVLYVYGQMKDLP GDFPNGAN-----GGTLTTIELEK-GYDFVRPTQRATYKFFAFA  
657 MVLFLVQVLAGIISAEDFV---QGGPGQAI-ISL-FGISIPFTVAR SWHTILQIYWFFMC  
658 WVGYTIFFLPRLSR-VPKGQRFLINLLFAMS VIAGAGVLFGIYFGQM GYM-SDTASYWFG  
659 SQGWEFLEMGRFWHIAILAA FVLWIAIIFRGV RPWITRQN-LWSVPAWLFY GSGIMVAFL  
660 FMSLGATTSGNFAIEDYWRW MNVHMWVEVTFEVFTTCIVGYMLVQMGLLN RAMAERVI FL  
661 AVMMFLVTAIVGISHNFYWIAKPTGIIALGSVFSTLQVMPLLLITLDAWRMRSEKI-----  
662 RAGEHQQEGRQKFVMEGVWLFILAVNFWNIVGAGVFGSLINLP IVNYFEHGTYLTGNHAH  
663 AAMFGVKGNIALGGMLFCCQHLFPRAAWNEKLIKNSFWSLQIGIVLMMTL DLFVPVGM YQL  
664 AAVLTHGFWYARTNEFVTGPVFTTLT WMRVIGGMVFLFGLLPLMWFILSRGRVLV-REL  
665 E-----VEEDEWTVYEK-----D---WAAHEEEI LRALK-----

666 -----  
667 >MBI2828937\_Acidobacteria\_NC\_groundwater\_629\_Ag\_B

668 M-----  
669 -NNNRHNSRTRQNFGKWL LAKPNWVQFSVVAGISLAGLLAL--GTW TYMGAPPYTSFV  
670 --SASTGETVIPYATVARGKEVFHLRGLMSWGSFWGDGAERGP DFTADALHRTVVSMSRSY  
671 YENELSRDR-----P---VTQADKDAISVRVQREIHENTRENGYD-EQADVIR  
672 INDAQIQAYRDLIVHYTRMFTDPSYP-----EKF---NLD---GFISD

```
673 PDDLRLTAFFYWGGWVAGANRPGETYSYTHNWPYDPAAGNNPTMATVLWSFLSILALFA
674 GAMLVLYVYGQMKELPGDPFNGAN-----GGTLTTFELEK-GYDFVRPTQRATYKFFAFA
675 VILFVVQVLGILSAEDFV---SGGPGMAI-TSV-LGISLPFSVVRWHTLLQIYWFFMA
676 WVGYTIFFLPRLSR-VPKGQRFLINLLFTLCVVAGAGVLFGIYFGQMGYM-SDTMSYWFG
677 NQGWEFLEMGRFWHIAILGAFALWIFIIFRGVWPWLTKQN-MWSVPAWLFYGSIMVFLFL
678 FMSLGATMGGNFAITDYWRWMNVHMWVEVTFEVFTTCIVGYMLVQMGLLNRAMAERVIFL
679 AVMMFLVTAIVGISHNFYWIAKPSGIIALGSVFSTLQVLPLLLITLDAWRMRNEKV-----
680 RAGEHLQEGKQKFVMEGVWLFILAVNFWNIVGAGVFGSLINLPVINYFEHSTYLTDGNHAH
681 AAMFGVKGNVALAGLLFCCQHLFPRAQWNEKLIRTSFWSLQSGIVLMMTLDLFPAGLYQL
682 AAVLTHGFYARTNDFVTGPVWVTLTWLRTIGGVVFLFGGVLPLTWVLSRGRSLL-REV
683 E-----IEEGEWTYDR-----D---WASHEEEILQVLKS-----
684 --RE
685 >CBL43845_Gammaproteobacterium_HdN1_NorZ2
686 MST-----
687 -NSLLGGSIRAKKNIALWLVSCKNWILQFLIVAICTGGLLYL--GAQTYISAPPIVNFV
688 --N-DKGDTVFSEQQIMDGKHWWSIRGLMAYGSFWGDGAERGPDFTADSLHRSVVAMREF
689 YAKEKKAELGVD-----A---LPVYETDAIAARVIRELH----NNAYD-EEAGIVR
690 LNPAQEYAFAEVREHYRKMFNATYS-----EAF---HPQ---GLISD
691 PEQITSLTSFFFWGGWASAANRPGETYSYTHNWPDPGAGNAPTATWIWSFLSILALFL
692 CIVVLYVYGQMRPELIDVFGTST---ENPFALTTHDLEN---GYVRPTQKATYKFFALA
693 MILFGVQIFAGIAAAWDFV---KPF-----GIS-LNDFLPFTASRSFHAIQIYVFFVC
694 WVGYTIFFLPRLSK-LPSSQRTMINSLFAMIVIVGLGTLIGVYLSTMGFL-DGWVAYWFG
695 TMGWEFMEMGRFFQLFLLVTFDFWYIIYRGVKNWLTRKN-IWSVPAWLLYGSIMVFLFL
696 FFGVLILEDQNFAIADYWRWMVVMWVEVTFEVFTTVIVGYLLVQMGLVTRLMAERTIFL
697 AVMLFLITAVIGISHNFYWIAKPTGIIALGSIFSTLQVLPMLLLTLDWAKMRQELG-----
698 RAHDLRQQGRQVHVMEGVWLFILGVNFWNIVGAGVFGSLINLPVINYEHATYLTGNHAH
699 AAMFGVKGNIAIAGMLFCLQHMFKSAWSETRIKGIFWSLQIGLVLMVLDMPVGLYQV
700 WLTLDGLWHARSSEVILGPVFASFYTLRVIGIAVFVLLGGALPLIWFVLSRGRTLQ-QET
701 E----VAEGEWTAYED-----D-EPWVAVKK-----
702 ----
703 >Ga0257115_100087344_SI112_100m_VIRAL
704 MTHLL--SLIVLIIALMGFLYLISWVFKIINKIIDIFKIKEEKMTTEFKNGEYIITTKDD
705 -SETVRSVLSFKDSVSALLLNKKYWFHFVIVSIIISILGLVYM--GGATYMGAPPVPTYV
706 --A-SNGEVIITEAEIMKGQEIFHLRGLMNYGSFWGDGAERGPDFTAETLHTMAVAMKGY
707 YAEQLKPGSVTQDDKLRKWKFD---ISEYDEGAIETRVKKELEH----NNTYT-EERNRVV
708 LNDAQIYGIEYVRWYEQMFTNADHP-----EAF---HPI---GYITD
709 KTDLNNLAFFYWGSWTSAADRPGDDFSYTSNWPYDPQAGNEPPPSLMMWSFLSIFILWI
710 GIMLVLYVYGQMRTPGGPFDMGA----RGPTLTADLES---GYVRPTQLATYKFFALS
711 IVMFGLQVLGILGAMDFV---NPF-----AHK-LANILPFNILRSYHTLLQIYWFFVA
712 WVGYTIFFLPRLSE-VPKHQEFLLINLLFGICVTVGVGGIVGVYLGQAGYM-TGWAAYWFG
713 SQGWEFMELGRFFQMLLLGGFSLWIYIIYRGVKNWITKKT-FWSVPAWLLWGSIMVFFL
714 FFGVLFATIDSNWAIADFWRMVVMWVEVTFEVFTTVIVGYILVQMGLVTKVMAERVIYL
715 AVILFLITATIGVAHNFYWIAKPESVIALGSVFSTLQILPLLLLTLDWQMRKEGI-----
716 GAYQSRDEGKQTFIMEGVWLFVIAVNFVNIVGAGIFGSLINLPVINYEHATYLTGNHAH
717 AAMFGVKGNVALAGILFVCQHLFTTESWNDKIIKYAFWSLNIGVVLMMFLDLFPAGLYQL
718 SIVLEDGFWLARAQETINGTVFQTLTYFRSIGGAVFVT-GVVALIWFILSRSMHLK-SET
719 GKA--ASTQDWTTAEN-----D---WQK-----
720 ----
```

```
721 >Ga0209665_10050414_SI074_LV_200m
722 M-----DE
723 -STSNGTKKEFKGTLAHMLLSKKYWFIFHWIVSVISIMGLVYM--GAATYMGAPPVPDFK
724 --N-ANGELVISEADIMKGQEIFHLRGLMNYGSFWGDGAERGPDFTAALHAITVSMKGY
725 YANQIKPGSVTQDDRLREWRFR---ISDYDEGAIEARIAKELH----VNTFN-EDTNTVI
726 LNDAQTDSFEYINWYYTQMFTNADHP-----EAF---YPT---NYISD
727 KQQLKELSAFFFWGAWTSAADRPGDAFSYTSNWPYDPAAGNTPPPGLMMWSFLSIGILLI
728 GIMIVLYVYQGMRLEPGSPFKLNP----TGKILTPDLEA---GYVRPTQKSTYKFFAVA
729 IVAFGLQVLGILGAMDF---NPF-----AHE-LAGVLPFNILRSYHTLLQIYWFFLM
730 WVGYTIFFLPRLSK-VPKGQNTLINILFGICVAVGLGGIFGVYLGQAGYL-TGWAAYWFG
731 SQGWEFMEELGRVWQTL LGGFTLWIFIIYRGVKPWITKKT-FWSVPAWLLWGSIMVFFL
732 FFGLFATIDQNWAIADFWRWVHMWVEVTFEVFTTVIVGYILVQLGLVSRAMA EKVIYL
733 AVILFLITATIGVAHNFYWIAKPEGVIAMGSVFSTLQILPLLLLTLD AWQMRKEGH----
734 GAYTNMANGTQNHAMDGVWLFILAVNFWNIFGAGVLGSLINLPVNYFEHATYLTGNHAH
735 AAMFGVKGNIALAGMLFVLQHLVKPEFWNPKLIKLSFWSLNLGIVFMMFFDLFPAGLYQF
736 SIVLEDGLWLARAQETITGTVFQTLTYFRSIGGLVFVV-GVVSLIWFVLTRGTKLK-DET
737 GKTVQIQTQEWNDLDN-----D---WVDEEHAVERGVEEEIKEINNFQVQRS AWKYK
738 K---
739 >St16_OMZ_317E_VIRAL
740 MVNIILMGLMMIFMVALAFVIFLSLV-ATKNIIINFF-----NTNTN
741 -RNNMKQDKEFKGTVAHMLLSKKYWFAHFVWVSVISIMGLLYM--GGATYMGAPPVPDYK
742 --N-ANGEMVFSSEIMKGQELFHLRGLMNYGSFWGDGAERGPDFTAALHATTVAMKGY
743 YAEQLKPGSVTQDDKLRKWRFD---IEEYDKGAIEAQVAKELH----INTYD-EDTNTVV
744 LNDAQVFSFEYINWYYTQMFTNADHP-----EAF---HPL---NYITD
745 ETQLRELSAFFFWGAWTSAADRPGDDFSYTSNWPYDPAAGNEPPPSLMMWSFLSIGILMA
746 GIMIVLYVYQGMRLEPGSPFKLNA----TGQLLTPDLEA---GYVRPTQKSTYKFFAIA
747 IVAFGLQVVAGILGAMDF---NPF-----AHQ-LADVLPFNILRSYHTLLQIYWFFLM
748 WVGYTIFFLPRLSK-VPKGQNTLINILFTICVIVGLGGVFGVYLGQAGYM-TGWAAYWFG
749 SQGWEFMEELGRFWQML LGGFTLWIFIIYRGVKPWITKKT-FWSVPAWLLWGSIMVFFL
750 FFGLFATIDQNWAIADFWRWVHMWVEVTFEVFTTVIVGYILVQMGLVSR SMAEKVIYL
751 AVILFLITATVGV AHNFYWIAKPEGVIAMGSVFSTLQILPLLLLTLD AWQMRKEGH----
752 GAFKNLANGTQNHVMDGVWLFILAVNFWNIMGAGVLGSLINLPVNYFEHATYLTGNHAH
753 AAMFGVKGNIALAGMLFVLQHLVKPEFWNPKLIKTA FWSLNLGIVLMMFFDLFPAGLYQF
754 MIVLEDGFWLARAQETITGTVFQTLTYFRSIGGLVFVV-GVVSLIWFVLTRGTKLK-DET
755 GKS--IQTQNWNDLDN-----D---WIDEQHAVANGVEEEVNELSTFE--QALIKHN
756 KKEQ
757 >WP_026951429_Algoriphagus_mannitolivorans
758 M-----
759 -----NTEPSFLTYLMKPKNWLPFLLI FTVSISGLIFI--GYQTYNEAPPIDYV
760 --D-SEGNMIIISQAEILAGQEVFHR YALMEYGS MFGDGALRGPDFTAQTLHTLAESIKEF
761 YRVQ--SPL-----D---PKPFELAGIEQMVKNEIK----KNRYQ-TRSNQTE
762 LTPAQVFAVSEINTFYQRVFLDPEFH-----EAF---KPA---GYLTD
763 PKEIEDLSKFFYWGAWVCSVARPGETYSYTHNWPFDPEAGNTP TASTVLWSMLGLFGLVL
764 GLGAVMYYYGQFEQLTEEYYAKGA-----SEMVTEEKVRS---FRPTPTQRATFKFFFVA
765 ILLFFIQVLAGVLT VHDFVGFTSFF-----GLD-LQALLPVTISR SWHVQISLYWISAC
766 WVGISFFILPILAKGEPKGQLKLINLLFAIFFVLVAGSLVGIYLGPMNML--GSLSRWLG
767 HQGWEFVELGRLYQYMLLAVFALWAVIVYRGLKGVMAKAK-PWELPNWL VYAVVCILILL
768 VSGFVASPETNFVVADFWRWVHMWVEAFFEVFTTIIVGYMMVM MGLVNRQAVTKVVYL
```



```
769 AALLFLGSGLLGISHNFYWNAKPVGTLALGSVFSTLQVVPLILLTLEAWRMQRMPQL-L-
770 AKKNNESGRSSLFAMPGVFLYLLGVNFWNFFGAGVFGLIINLPIVNYYEHGTYLTVNHGH
771 AALMGVYGNLSIAGILFALRYLVQPTSWNPQLVKLSFWSINLGLVFMVVLDFPAGIHQL
772 FTVMDQGYWFARSQDFIQSTPFQMTWLRIVGGSLFLLGGVIPLTWMVIKSSRQLK-YEQ
773 P-----FVLNRFHQERKEM----E-----
774 --LH
775 >WP_130276701_Cecemia_calidifontis
776 M-----
777 -----KPDTKFLNYIMKQKNWWLPFMVIFVISIVGLLFI--AYQTYEEAPPIPHYV
778 --D-EKGEEIITQEILRGQEVFHRYSALMEYGSFMFGDGALRGPDFTAQALNERAKSMFRF
779 YQESLNENG-----S---RSEFESEGILRKVQKEIK----ENTYD-ENNNQVN
780 ISFAQVAAIRDLEGFYQEMFLNPDFH-----EAF---KPT---GYISD
781 PTEIKDLSAFFFWGSWVCSVERPGEKYSYTHNWPYDEFAGNVATPSTLIWSIVGLLGLVL
782 GLGIVLYYYGQFEQLSEEYYAKGA-----SEMVTEEKLQQ---YKPTPTQRATFKFFYVA
783 VILFLIQVLAVLTVHDFVGFTKFF-----GWD-IQEVLPVTISRSHVQLSLFWISAC
784 WVGISFFILPLLAKSEPKGQLFLINLLFGIFFVMVGGSFVGFIFMGPMGML--GDYSRWLG
785 HQGWEFVELGRLYQYFLLAIFALWAIIVYRGVKNTLRPGM-PWGLPNWLVSIVCILLLL
786 LSGFVARPETNFVIADFWRWVVMVHMWVEAFFEVFTTIIVGYMMVMMGLVNRQAVVKVYI
787 AALLFLGSGLLGISHNFYWNAKPVGTLALGSVFSTLQVVPLILLTLEAWRMQRMPYL-L-
788 STKQKERHRSSLFAMPGVFLFIIGVTFWNFFGAGVFGLIINLPIANYEHGTYLTVNHGH
789 AALMGVYGNLSIAAILFALRFLKPEAWNTQLVKTAFWWSINIGLLLMVTLDFPAGIHQL
790 VAVMEEGYWFARSQEFIQSVPFQAMTWLRIVGGAFFCIGGLFPLTWVFLKSAKHLK-PAY
791 E----MEKIDHHEEEVEEEI----E-----
792 --TV
793 >Ga0066828_100166541
794 -----
795 -----MKSTNWWKYLLAVLVVGASGVIFM--GISTYKDAPPKPDYI
796 --S-PSGVEIVQQASVERGQLVFQRYALMEYGSFMFGDGAARGPDFTAALHQAQVAVEMNTF
797 YGQQVASGSTD-----E---LSQIEKDGISVRVKRELK----ANRYD-RERNIVV
798 LTEGQAYAAGR LAEYYNSKF-KGDHK-----EAF---KPA---GYITD
799 DAELKDLSAFFFWGAWCAVERPGGESSYTHNWPFDYAGNTPTPSVILWSVIGMLFLIF
800 GLGAVLCTYSYYSKASQLQ-----VKEDPVDNKSVD A---SAPTASQRATYKFFVVA
801 VSLFFIQILAGVLTIHDFVGFITFF-----GYN-ISELLQITITRSWHVQLSILWIATC
802 WIAGSIFILPGIYRQEPKRQVLLINVLFGLLVSVVIGMFVGCFLGPKNLL--GDHWRLLG
803 NQGWEFVELGKLWQVVLFAALVMWSVIVYRGVKPALKGQS-AFSLPYWILYSVIAITILF
804 LSSFVGGKNTNFVIADFWRWCVIHMWAECFFEFTTMVIACYMLMGLVSRQATRVIYL
805 ATLLFLGSGLLGISHNFYWNAKPAALMAMGSVFSTLQVIPLVLLTLEVWKFVRVPGYSF-
806 GPSTNSAVTGSSFGFSEAFLLIAVNFWNFFGAGVFGLIINLPIMNYYEHGTYLTVNHGH
807 AALMGVYGNLSIAAVLFCSRHVITSRRWNVRLLRSTFWAINVGLLLMVMDTFPAGVLQF
808 RSVVENGYWVARSQEFILGSAFQVLTWMRAVGGVLF-FAGVIPLLYFMISRLNSLK-AAS
809 T----VYSSEESVLIKEELT----K-----CDA-----
810 ----
811 >Ga0187827_100070556
812 -----
813 -----MKSTNWWKYLLAVLVVGASGVIFM--GISTYKDAPPKPDYI
814 --S-PSGVEIVQQASVERGQLVFQRYALMEYGSFMFGDGAARGPDFTAALHRVAVEMNAF
815 YGQQVASGSTD-----E---LSQIEKDGISVRVKRELK----ANRYD-RERNIVV
816 LTEGQAYAAGR LAEYYNSKF-KGDHK-----EAF---KPA---GYITD
```

```
817 DAELKDLSAFFFWGAWCAVERPGGESSYTHNWPFD EYAGNTPTPSVILWSVIGMLFLIF
818 GLGAVLCTYSYYSKASQLQ-----VKEDPVDNKSVD A---SAPTASQRATYKFFVVA
819 VSLFFIQILAGVLTIHDFVGFTTFF-----GYN-ISELLQITITRSWHVQLSILWIATC
820 WIAGSIFILPGIYRQEPKRQVLLINVLFGLLVSVVIGM FVGCFLGPKNLL--GDHWRLLG
821 NQGWEFVELGKLWQVVLFAALVMWSVIVYRGVKPALKG QS-AFSLPYWILYSVIAITILF
822 LSSFVGGKNTNFVIADFWRWCVIHMWAECFFEVF TTMVIACYMVLMGLVSRQGATRVIYL
823 ATLLFLGSGLLGISHNFYWNAKPAALMAMGSVFSTL QVIPLVLLTLEVWKFVRVPGYSF-
824 GPSTNSAVTGSSFGFSEAFLFLIAVNFWNFFGAGV FGLIINLPIMNYYEHGTYLTVNHGH
825 AALMGVYGNLSIAAVLFCSRHVITSRRWNVRLLRST FWAMNVGLLLMVMTDTPAGVLQF
826 KSVVENGYWVARSQEFILGGAFQMLTWMRAVGGVLF -FAGVIPLLYFMISRLNSLK-VAA
827 T----AHSSEELVLTKEELP-----E-----CDV Q-----
828 --VA
829 >MBT3880006_Scalindua_SI054_bin45
830 -----
831 -----MKSTNWWKYLLAVLVGASGVIFM--GFSTY KDAPPKPDYI
832 --S-PSGVEIVQRAAVERGQLVFQKYALMEYGS MFGDGAARGPDFTAEALHRIAVEMNDY
833 YGRQVTNNLD-----E---LSQIEKDGISIRVKR ELK----ANRYD-GERNIVV
834 LTEGQAYAAERLVEYYSSKF-KGDHK-----EAF ---KPA---GYITD
835 DSELKDLTAFFFWGAWCAVERPGGESSYTHNWPFD EYAGNTPTPSVILWSVIGMLFLIF
836 GLGAVLCTYSYYSKTSQLQ-----VKENPVNKSVD A---SAPTASQRATYKFFVVA
837 VALFFIQIVAGVLTIHDFVGFTTFF-----GYN-ISE FLQITITRSWHVQLSVLWIATC
838 WIAGSIFILPGIYRQEPKRQVLLINVLFGLLVSVV VVGMVLVGCFLGPKNLL--GDHWRLLG
839 NQGWEFVELGKLWQVVLFASLVMWSVIIYRGVKP ALKGQS-AFSLPYWILYSVIAITILF
840 LSSFVGGKNTNFVIADFWRWCVIHMWAECFFEVF TTMIIACYMVMGLVSRQGAIRVIYL
841 ATLLFLGSGLLGISHNFYWNAKPAALMAMGSVFST LQVIPLVLLTLEVWKFVRVPEYSL-
842 RRSANSAVAGSSFGFSEAFLFLIAVNFWNFFGAGV FGLIINLPIINYYEHGTYLTVNHGH
843 AALMGVYGNLSIAAVLFCSRHVIIARRWNVRLLRST FWAINVGLLLMVMDTTPAGVLQF
844 RSVVENGYWVARSQEFILGGTFQVLTWLRVGGVLF -FAGVVPLLYFMISRLNSLK-AAA
845 T----EHSSEEPILIKEEIP-----E-----CDV R-----
846 --VA
847 >WP_096896255_Scalindua_japonica
848 -----
849 -----MKSTNWWKYLLAVLVGASGVIFM--GFSTY KDAPPKPDYI
850 --S-PEGVEIVQKSAVERGQLVFQKYALMEYGS MFGDGAARGPDFTAEALHRIAVDMNNY
851 YGRQVTDGNLS-----E---LSQIEKDGISVQVR RELK----ENRYD-MERNIVV
852 LTEGYAYAAEQLVDYYRLKF-KGNHK-----EAF ---KPA---GYITD
853 DSELNDLSAFFFWGAWVCAAERPGGESSYTHNWPFD EYAGNVPTPSVILWSVIGMLFLIF
854 GLGAVLCTYSYYSKASQLQ-----VKENPVNKSVE A---SIPTATQRAAYKFFVVA
855 VALLFIQIVAGVLTIHDFVGFTTFF-----GYN-ISE FLQITITRSWHVQLSILWIATC
856 WIAGSIFLLPGIHRQEPNRQVLLINVLFGLLVSVV VVGMVLVGCFLGPKNLL--GDNWRLFG
857 NQGWEFVELGKVWQIVLFAALIMWAVIIYRGVKP ALKGQS-AFSLPYWILYSVVAITILF
858 LSSFVGGKNTNFVIADFWRWCVIHMWAECFFEVF TTIACYMVMGLVSRQGATRVIYL
859 ATLLFLGSGLLGISHNFYWNAKPAALMAIGSVFST LQVIPLVLLTLEVWKFVRIPGYSI-
860 RRSEDSAVTGSSFGFSEAFLFLIAVNFWNFFGAGV FGLIINLPIINYYEHGTYLTVNHGH
861 AALMGVYGNLSIAAVLFCSRHVITSRRWNVRLLRST FWAINVGLLLMVMDTTPAGVLQF
862 RSVVENGYWVARSQEFILGGAFQVLTWMRAVGGVLF -FAGVIPLLYFMVSRLNSLK-AAA
863 T----TQKSEEPVLITEELP-----E-----RDV Q-----
864 --VA
```

```
865 >Ga0066833_100015614
866 -----
867 -----MQRNNWwKYLLVVLVAGTAGVLFM--GIKTYKDAPPKPDYV
868 --S--SSGEPVFMRASVERGQQVFQKYALMEYGSMFGDGAARGPDFTAELHQIIVEMNDY
869 YGKQFTNGRTE-----E---LTQIEKDGISVRVKRELK----TNYVD--GERDIVV
870 LTEGQVYAAGQLVEYYRLKF--KGDHR-----ESF---KPA---GYITD
871 DSELEDLAAFFFWGSWVCAAERPGGESSYTHNWPYDEYAGNIPTPSVILWSVIGMLFFIF
872 GLGAVLCIYGYAKSSGLQPP-----AKEKPVSNESISS---SVPTAGQRATYKFFAVA
873 VAMFFLQIVAGVLTIHDFVGFTTFF-----GYD--IAEYLQITITRSWHVQLSILWISVC
874 WIAGSIFILPSIHRQESKHQVTLINVLFWLLITVVVGMVLVGC FMGPKNML--GDHWRLLG
875 NQGWEFVELGKLWQIFLFAALIMWAVIIYRGVKPALKGQS--AFSLPYWILYSVVAITVLF
876 TSGFVSGPNTNFVIADFWRWCVIHMWAECFFEFTTIIIVACYLVFMGLITRQAATRVIYL
877 ATLLFLGSGLLGISHNFYWNAKPAALMAMGSVFSTLQVVPLILLTIEVWKFARVPDYSLG
878 KRSENEAVKGTSGFSEAFLLIAVNFWNFFGAGVLGLIINLPIINYFEHGTYLTVNHGH
879 AALMGVYGNVSLAAVLFCSRHLIVSRRWNVRLLRSSFWAINVGLLLMVALDTFPAGVLQF
880 KLVVESGYWIARSQEFILGGPFQVLTWMRAVGGVFFFGGVIPLFYFMMTRLNSLK--AAA
881 P----GHVPADPVRIEELP----E-----LNVQ-----
882 --TA
883 >Ga0066834_100088392
884 -----
885 -----MQRNNWwKYLLVVLVAGTAGVLFM--GIKTYKDAPPKPDYV
886 --S--SSGEPVFMRASVERGQQVFQKYALMEYGSMFGDGAARGPDFTAELHQIIVEMNDY
887 YGKQFTNGRTE-----E---LTQIEKDGISVRVKRELK----TNYVD--RERDIVV
888 LTEGQVYAAGQLVEYYRLKF--KGDHR-----ESF---KPA---GYITD
889 DSELEDLAAFFFWGSWVCAAERPGGESSYTHNWPYDEYAGNIPTPSVILWSVIGMLFFIF
890 GLGAVLCIYGYAKSSGLQPP-----AKEKPVSNESISS---SVPTAGQRATYKFFAVA
891 VAMFFLQIVAGVLTIHDFVGFTTFF-----GYD--IAEYLQITITRSWHVQLSILWISVC
892 WIAGSIFILPSIHRQESKHQVTLINVLFWLLITVVVGMVLVGC FMGPKNML--GDHWRLLG
893 NQGWEFVELGKLWQIFLFAALIMWAVIIYRGVKPALKGQS--AFSLPYWILYSVVAITVLF
894 TSGFVSGPNTNFVIADFWRWCVIHMWAECFFEFTTIIIVACYLVFMGLITRQAATRVIYL
895 ATLLFLGSGLLGISHNFYWNAKPAALMAMGSVFSTLQVIPLILLTIEVWKFARVPDYSLG
896 KRSENEAVKGTSGFSEAFLLIAVNFWNFFGAGVLGLIINLPIINYFEHGTYLTVNHGH
897 AALMGVYGNVSLAAVLFCSRHLIVSRRWNVRLLRSSFWAINVGLLLMVALDTFPAGVLQF
898 KLVVESGYWIARSQEFILGGPFQVLTWMRAVGGVFFFGGVIPLFYFMMTRLNSLK--AAA
899 P----GHVPADPVRIEELP----E-----LNVQ-----
900 --TA
901 >Ga0208638_10055013*****
902 -----
903 -----MQRNNWwKYLLVVLVAGTAGVLFM--GIKTYKDAPPKPDYV
904 --S--SSGEPVFMRASVERGQQVFQKYALMEYGSMFGDGAARGPDFTAELHQIIVEMNDY
905 YGKQFTNGRTE-----E---LTQIEKDGISVRVKRELK----TNYVD--RERDIVV
906 LTEGQVYAAGQLVEYYRLKF--KGDHR-----ESF---KPA---GYITD
907 DSELEDLAAFFFWGSWVCAAERPGGESSYTHNWPYDEYAGNIPTPSVILWSVIGMLFFIF
908 GLGAVLCIYGYAKSSGLQPP-----AKEKPVSNESISS---SVPTAGQRATYKFFAVA
909 VAMFFLQIVAGVLTIHDFVGFTTFF-----GYD--IAEYLQITITRSWHVQLSILWISVC
910 WIAGSIFILPSIHRQESKHQVTLINVLFWLLITVVVGMVLVGC FMGPKNML--GDHWRLLG
911 NQGWEFVELGKLWQIFLFAALIMWAVIIYRGVKPALKGQS--AFSLPYWILYSVVAITVLF
912 TSGFVSGPNTNFVIADFWRWCVIHMWAECFFEFTTIIIVACYLVFMGLITRQAATRVIYL
```

```
913 ATLLFLGSGLLGISHNFYWNAKPAALMAMGSVFSTLQVVPLILLTIEVWKFARVPDYSLG
914 KRSENEAVKGTSTFGFSEAFLFLIAVNFWNFFGAGVLGLIINLPIINYFEHGTYLTVNHGH
915 AALMGVYGNVSLAAVLFCRHLIVSRRWNVRLLRSSFWAINVGLLLMVALDTFPAGVLQF
916 KLVVESGYWIARSQEFILGGPFQVLTWMRAVGGVVFVFFGGVIPLFYFMMTRLNSLK-AAA
917 P----GHVPADPVRIEEPLP----E-----LNVQ-----
918 --TA
919 >Ga0208642_10056733*****
920 -----
921 -----MQRNNWYIYLLVVLVTGAAGVLFM--GIKTYKDAPPKPDYV
922 --S--SSGEEVFTRASIERGQLVFQKYALMEYGSFMFGDGAVRGPDFTAELHQIAVQMNDY
923 YGRQITNDSSA-----E---LTQIEKDGISVRVKRELK----TNYVD--REGIVV
924 LTEGQVYAAERLVEYYRSKF--KGDHR-----ESF---KPA---GYITD
925 DSELEDLAAFFFWGSWVCSAERPGEESYTHNWPYDEYAGNIPTPSVILWSVIGLLFLIF
926 GLGAVLCIYGYAKSAGLQSP-----DEENPVNNENVSS---SVPTAGQRATYKFFMVA
927 VAMFFLQIVAGVLTIHDFVGFTTFF-----GYN--ISEYLQITITRSWHVQLSILWISVC
928 WIAGSIFILPSIHRQESKHQVTLINVLFWLLVTVVVGMLAGCFMGPKNML--GDHWRLLG
929 NQGWEFVELGKLWQVFLFAALIMWAVIIYRGVKPALKGQS-AFSLPYWILYSVVAIAVLV
930 TSGFVSGPNTNFVIADFWRWCVIHMWAECFFEFTTIIIVACYLVFMGLITRQAATRVIYL
931 ATLLFLGSGLLGISHNFYWNAKPAALMAMGSVFSTLQVIPLILLTIEVWKFARVPGYSLG
932 KRSENAAVKGTSTFGFSEAFLFLIAVNFWNFFGAGVFGLIINLPIINYFEHGTYLTVNHGH
933 AALMGVYGNVSIAAILFCRQLIVSRRWNVRLLRSSFWAVNVGLLLMVTMDTFPAGVLQF
934 KSVVENGYWAARSQEFILGGPFQVLTWMRAVGGSVVFFGGVIPLFYFMITRLNSLK-AAA
935 P----GHVSEDPVRIEEPLP----E-----FNVQ-----
936 --TA
937 >BAG66139_Geobacillus_stearothermophilus
938 MEV-----
939 -----NRTVSPNIQTG-RKTTNSFLKSILIFTILISSTVLLVGGYWIFKEMAPRPKEV
940 -RS-ESGEVLMTKETIIGGQAVFQKYGLMDYGTVLGHGSYMGPDYTAELKVYTEGMQDY
941 KAKERYNKPFA-----D---LTDDEKSIIREQVIKEMR----KNRYN-PVTDVLV
942 LTDAQVYGLEKVRDYRDVFTNGDGWGLKKGLIK-----ESD---MPKANRAWVAD
943 SDQIQIADFFFWTAWLSSTLRIGDEITYTNNWPYYEDAGNTMSFSAVWWSGASVTILIL
944 FIGIILYVFYRYQLSMQEAYA-----EGKFPVIDLRR---QPLTPSQVKAGKYFVVV
945 SALFFVQTMFGALLAHYYTEPDSFF-----GINWIYDILPFNIAKGYHLQLAIFWIATA
946 WLGMGIFIAPLVGGQEPKKQGLLDLLFWALVVLVGGSMIGQWLVGNGYL--GNEWFLLG
947 HQGWEYIELGRIWQIILVVGMLLWLFIVFRGVKRGKRESKGGLIHLLFYSIAIVPFFY
948 IFAFFIQPDTNFTMADFWRWWIHLWVEGIFEVFAVVVIGFLLVQLRLVTKKSTVRALYF
949 QFTILLGSGVIGIGHYHYNGSPEVWIALGAVFSALEVIPLTLLILEAYEQYKM-----
950 -----MRDGGANFPYKATFWFLISTAIWNLVGAGVFGFLINLPAVSYFEHQFLTPAHGH
951 AAMMGVYGMFAIAVLLYSLRNIVKPEAWNDKWLKFCWMLNIGLAGMVVITLLPVGILQM
952 KEAFIHGYWASRSPSFLQQDVVQNLLLVRAVPDTIFLI-GVVALLVFAIKALFHLR-KPT
953 H-----GEGEELPVAN-----H---WMKDRLKNS-----
954 -----
```
